# Supplementary material for: Integrating Network Pharmacology and Pharmacological Validation for Deciphering the Mechanism of Qishen Yixin Granules in Suppressing myocardial fibrosis
Source: Research Square preprint supplement (doi:10.21203/rs.3.rs-1526523/v1), 2022-04-08
Supplement: Supplementary file 1 [file 113fc9115ab73fd4fa27ac46.xlsx]

## Sheet: Sheet1
ITGAM	ITGAM	G:9606:ITGAM	180226	1902	integrin subunit alpha M	gene	["biological_process-&-1&-GO:0007155-&&-cell adhesion-%%-GO:0007229-&&-integrin-mediated signaling pathway-%%-GO:0010668-&&-ectodermal cell differentiation-%%-GO:0030198-&&-extracellular matrix organization-%%-GO:0034142-&&-toll-like receptor 4 signaling pathway-%%-GO:0043312-&&-neutrophil degranulation-%%-GO:0050900-&&-leukocyte migration","cellular_component-&-1&-GO:0005886-&&-plasma membrane-%…	["KEGG-&-1&-hsa04810-&&-Regulation of actin cytoskeleton-%%-hsa05150-&&-Staphylococcus aureus infection-%%-hsa05146-&&-Amoebiasis-%%-hsa04610-&&-Complement and coagulation cascades-%%-hsa05133-&&-Pertussis-%%-hsa05152-&&-Tuberculosis-%%-hsa05221-&&-Acute myeloid leukemia-%%-hsa04015-&&-Rap1 signaling pathway-%%-hsa05134-&&-Legionellosis-%%-hsa04670-&&-Leukocyte transendothelial migration-%%-hsa04…	ITGAM	Homo sapiens (Human)-&&-9606	taxon:9606	["Gene Symbol-&-1&-ITGAM"]	[""]	FALSE	8	8
ITGAL	ITGAL	G:9606:ITGAL	180227	1902	integrin subunit alpha L	gene	["biological_process-&-1&-GO:0007157-&&-heterophilic cell-cell adhesion via plasma membrane cell adhesion molecules-%%-GO:0002291-&&-T cell activation via T cell receptor contact with antigen bound to MHC molecule on antigen presenting cell-%%-GO:0007155-&&-cell adhesion-%%-GO:0007165-&&-signal transduction-%%-GO:0006909-&&-phagocytosis-%%-GO:0006928-&&-movement of cell or subcellular component-%…	["KEGG-&-1&-hsa05323-&&-Rheumatoid arthritis-%%-hsa04810-&&-Regulation of actin cytoskeleton-%%-hsa05144-&&-Malaria-%%-hsa05166-&&-Human T-cell leukemia virus 1 infection-%%-hsa04015-&&-Rap1 signaling pathway-%%-hsa05150-&&-Staphylococcus aureus infection-%%-hsa04670-&&-Leukocyte transendothelial migration-%%-hsa04514-&&-Cell adhesion molecules (CAMs)-%%-hsa04650-&&-Natural killer cell mediated c…	ITGAL	Homo sapiens (Human)-&&-9606	taxon:9606	["Gene Symbol-&-1&-ITGAL"]	[""]	FALSE	4	4
ITGAV	ITGAV	G:9606:ITGAV	180225	1902	integrin subunit alpha V	gene	["biological_process-&-1&-GO:0001525-&&-angiogenesis-%%-GO:0016049-&&-cell growth-%%-GO:0001570-&&-vasculogenesis-%%-GO:0002479-&&-antigen processing and presentation of exogenous peptide antigen via MHC class I, TAP-dependent-%%-GO:0007155-&&-cell adhesion-%%-GO:0007160-&&-cell-matrix adhesion-%%-GO:0007204-&&-positive regulation of cytosolic calcium ion concentration-%%-GO:0007229-&&-integrin-m…	["KEGG-&-1&-hsa04810-&&-Regulation of actin cytoskeleton-%%-hsa04510-&&-Focal adhesion-%%-hsa04512-&&-ECM-receptor interaction-%%-hsa05165-&&-Human papillomavirus infection-%%-hsa05412-&&-Arrhythmogenic right ventricular cardiomyopathy (ARVC)-%%-hsa05418-&&-Fluid shear stress and atherosclerosis-%%-hsa05200-&&-Pathways in cancer-%%-hsa05410-&&-Hypertrophic cardiomyopathy (HCM)-%%-hsa05205-&&-Prot…	ITGAV	Homo sapiens (Human)-&&-9606	taxon:9606	["Gene Symbol-&-1&-ITGAV"]	[""]	FALSE	20	20
ITGA9	ITGA9	G:9606:ITGA9	180230	1902	integrin subunit alpha 9	gene	["biological_process-&-1&-GO:0007155-&&-cell adhesion-%%-GO:0007229-&&-integrin-mediated signaling pathway-%%-GO:0030198-&&-extracellular matrix organization-%%-GO:0030593-&&-neutrophil chemotaxis-%%-GO:0042060-&&-wound healing","cellular_component-&-1&-GO:0005886-&&-plasma membrane-%%-GO:0008305-&&-integrin complex-%%-GO:0009925-&&-basal plasma membrane-%%-GO:0034679-&&-integrin alpha9-beta1 com…	["KEGG-&-1&-hsa04810-&&-Regulation of actin cytoskeleton-%%-hsa04510-&&-Focal adhesion-%%-hsa04151-&&-PI3K-Akt signaling pathway-%%-hsa04512-&&-ECM-receptor interaction-%%-hsa04514-&&-Cell adhesion molecules (CAMs)-%%-hsa05414-&&-Dilated cardiomyopathy (DCM)-%%-hsa05165-&&-Human papillomavirus infection-%%-hsa05412-&&-Arrhythmogenic right ventricular cardiomyopathy (ARVC)-%%-hsa05410-&&-Hypertrop…	ITGA9	Homo sapiens (Human)-&&-9606	taxon:9606	["Gene Symbol-&-1&-ITGA9"]	[""]	FALSE	2	2
ITGAD	ITGAD	G:9606:ITGAD	180229	1902	integrin subunit alpha D	gene	["biological_process-&-1&-GO:0006955-&&-immune response-%%-GO:0007229-&&-integrin-mediated signaling pathway-%%-GO:0030198-&&-extracellular matrix organization-%%-GO:0034113-&&-heterotypic cell-cell adhesion","cellular_component-&-1&-GO:0005886-&&-plasma membrane-%%-GO:0008305-&&-integrin complex-%%-GO:0009986-&&-cell surface","molecular_function-&-1&-GO:0046872-&&-metal ion binding"]	["KEGG-&-1&-hsa04810-&&-Regulation of actin cytoskeleton"]	ITGAD	Homo sapiens (Human)-&&-9606	taxon:9606	["Gene Symbol-&-1&-ITGAD"]	[""]	FALSE	2	2
HNRNPH3	HNRNPH3	G:9606:HNRNPH3	180234	1902	heterogeneous nuclear ribonucleoprotein H3	gene	["biological_process-&-1&-GO:0000398-&&-mRNA splicing, via spliceosome-%%-GO:0006396-&&-RNA processing-%%-GO:0008380-&&-RNA splicing-%%-GO:0030855-&&-epithelial cell differentiation","cellular_component-&-1&-GO:0005634-&&-nucleus-%%-GO:0005654-&&-nucleoplasm-%%-GO:0005681-&&-spliceosomal complex","molecular_function-&-1&-GO:0000166-&&-nucleotide binding-%%-GO:0005515-&&-protein binding-%%-GO:0003…	[""]	HNRNPH3	Homo sapiens (Human)-&&-9606	taxon:9606	["Gene Symbol-&-1&-HNRNPH3"]	[""]	FALSE	38	38
PURA	PURA	G:9606:PURA	178187	1902	purine rich element binding protein A	gene	["biological_process-&-1&-GO:0006268-&&-DNA unwinding involved in DNA replication-%%-GO:0006270-&&-DNA replication initiation-%%-GO:0006351-&&-transcription, DNA-templated-%%-GO:0006357-&&-regulation of transcription from RNA polymerase II promoter-%%-GO:0007399-&&-nervous system development-%%-GO:0008284-&&-positive regulation of cell proliferation-%%-GO:0045892-&&-negative regulation of transcr…	[""]	PURA	Homo sapiens (Human)-&&-9606	taxon:9606	["Gene Symbol-&-1&-PURA"]	[""]	FALSE	13	13
RUVBL2	RUVBL2	G:9606:RUVBL2	174088	1902	RuvB like AAA ATPase 2	gene	["biological_process-&-1&-GO:0006457-&&-protein folding-%%-GO:0006281-&&-DNA repair-%%-GO:0006310-&&-DNA recombination-%%-GO:0006338-&&-chromatin remodeling-%%-GO:0006351-&&-transcription, DNA-templated-%%-GO:0032508-&&-DNA duplex unwinding-%%-GO:0034644-&&-cellular response to UV-%%-GO:0035066-&&-positive regulation of histone acetylation-%%-GO:0040008-&&-regulation of growth-%%-GO:0043967-&&-hi…	[""]	RUVBL2	Homo sapiens (Human)-&&-9606	taxon:9606	["Gene Symbol-&-1&-RUVBL2"]	[""]	FALSE	59	59
ITGA5	ITGA5	G:9606:ITGA5	180232	1902	integrin subunit alpha 5	gene	["biological_process-&-1&-GO:0001525-&&-angiogenesis-%%-GO:0007157-&&-heterophilic cell-cell adhesion via plasma membrane cell adhesion molecules-%%-GO:0007155-&&-cell adhesion-%%-GO:0007044-&&-cell-substrate junction assembly-%%-GO:0007159-&&-leukocyte cell-cell adhesion-%%-GO:0007229-&&-integrin-mediated signaling pathway-%%-GO:0007613-&&-memory-%%-GO:0010811-&&-positive regulation of cell-subs…	["KEGG-&-1&-hsa04810-&&-Regulation of actin cytoskeleton-%%-hsa04510-&&-Focal adhesion-%%-hsa04512-&&-ECM-receptor interaction-%%-hsa05100-&&-Bacterial invasion of epithelial cells-%%-hsa05165-&&-Human papillomavirus infection-%%-hsa05133-&&-Pertussis-%%-hsa05412-&&-Arrhythmogenic right ventricular cardiomyopathy (ARVC)-%%-hsa05410-&&-Hypertrophic cardiomyopathy (HCM)-%%-hsa05205-&&-Proteoglycans…	ITGA5	Homo sapiens (Human)-&&-9606	taxon:9606	["Gene Symbol-&-1&-ITGA5"]	[""]	FALSE	22	22
HNRNPK	HNRNPK	G:9606:HNRNPK	180233	1902	heterogeneous nuclear ribonucleoprotein K	gene	["biological_process-&-1&-GO:0000398-&&-mRNA splicing, via spliceosome-%%-GO:0006366-&&-transcription from RNA polymerase II promoter-%%-GO:0007165-&&-signal transduction-%%-GO:0006396-&&-RNA processing-%%-GO:0043066-&&-negative regulation of apoptotic process-%%-GO:0016032-&&-viral process-%%-GO:0010467-&&-gene expression-%%-GO:0010988-&&-regulation of low-density lipoprotein particle clearance-…	["KEGG-&-1&-hsa03040-&&-Spliceosome-%%-hsa05168-&&-Herpes simplex infection-%%-hsa05206-&&-MicroRNAs in cancer-%%-hsa05203-&&-Viral carcinogenesis"]	HNRNPK	Homo sapiens (Human)-&&-9606	taxon:9606	["Gene Symbol-&-1&-HNRNPK"]	[""]	FALSE	121	289.153	121
HNRNPF	HNRNPF	G:9606:HNRNPF	180238	1902	heterogeneous nuclear ribonucleoprotein F	gene	["biological_process-&-1&-GO:0000398-&&-mRNA splicing, via spliceosome-%%-GO:0006396-&&-RNA processing-%%-GO:0008543-&&-fibroblast growth factor receptor signaling pathway-%%-GO:0010467-&&-gene expression-%%-GO:0043484-&&-regulation of RNA splicing","cellular_component-&-1&-GO:0016020-&&-membrane-%%-GO:0005829-&&-cytosol-%%-GO:0005634-&&-nucleus-%%-GO:0005654-&&-nucleoplasm-%%-GO:0071013-&&-catal…	[""]	HNRNPF	Homo sapiens (Human)-&&-9606	taxon:9606	["Gene Symbol-&-1&-HNRNPF"]	[""]	FALSE	59	59
CDK2	CDK2	G:9606:CDK2	182287	1902	cyclin dependent kinase 2	gene	["biological_process-&-1&-GO:0006260-&&-DNA replication-%%-GO:0000082-&&-G1/S transition of mitotic cell cycle-%%-GO:0000086-&&-G2/M transition of mitotic cell cycle-%%-GO:0000122-&&-negative regulation of transcription from RNA polymerase II promoter-%%-GO:0006281-&&-DNA repair-%%-GO:0006813-&&-potassium ion transport-%%-GO:0006977-&&-DNA damage response, signal transduction by p53 class mediato…	["KEGG-&-1&-hsa04914-&&-Progesterone-mediated oocyte maturation-%%-hsa04068-&&-FoxO signaling pathway-%%-hsa05161-&&-Hepatitis B-%%-hsa04218-&&-Cellular senescence-%%-hsa05165-&&-Human papillomavirus infection-%%-hsa05169-&&-Epstein-Barr virus infection-%%-hsa04114-&&-Oocyte meiosis-%%-hsa05200-&&-Pathways in cancer-%%-hsa05203-&&-Viral carcinogenesis-%%-hsa04934-&&-Cushing syndrome-%%-hsa05160-&…	CDK2	Homo sapiens (Human)-&&-9606	taxon:9606	["Gene Symbol-&-1&-CDK2"]	[""]	FALSE	307	1261.61	307
HNRNPD	HNRNPD	G:9606:HNRNPD	180239	1902	heterogeneous nuclear ribonucleoprotein D	gene	["biological_process-&-1&-GO:0000398-&&-mRNA splicing, via spliceosome-%%-GO:0000723-&&-telomere maintenance-%%-GO:0001889-&&-liver development-%%-GO:0006351-&&-transcription, DNA-templated-%%-GO:0006355-&&-regulation of transcription, DNA-templated-%%-GO:0006396-&&-RNA processing-%%-GO:0006401-&&-RNA catabolic process-%%-GO:0042493-&&-response to drug-%%-GO:0010467-&&-gene expression-%%-GO:00457…	[""]	HNRNPD	Homo sapiens (Human)-&&-9606	taxon:9606	["Gene Symbol-&-1&-HNRNPD"]	[""]	FALSE	99	105.682	99
CDK5	CDK5	G:9606:CDK5	182284	1902	cyclin dependent kinase 5	gene	["biological_process-&-1&-GO:0001764-&&-neuron migration-%%-GO:0001963-&&-synaptic transmission, dopaminergic-%%-GO:0006886-&&-intracellular protein transport-%%-GO:0006913-&&-nucleocytoplasmic transport-%%-GO:0007049-&&-cell cycle-%%-GO:0007160-&&-cell-matrix adhesion-%%-GO:0007268-&&-chemical synaptic transmission-%%-GO:0007416-&&-synapse assembly-%%-GO:0007519-&&-skeletal muscle tissue develop…	["KEGG-&-1&-hsa04360-&&-Axon guidance-%%-hsa05030-&&-Cocaine addiction-%%-hsa05010-&&-Alzheimer disease"]	CDK5	Homo sapiens (Human)-&&-9606	taxon:9606	["Gene Symbol-&-1&-CDK5"]	[""]	FALSE	39	39
HNRNPH1	HNRNPH1	G:9606:HNRNPH1	180236	1902	heterogeneous nuclear ribonucleoprotein H1	gene	["biological_process-&-1&-GO:0000398-&&-mRNA splicing, via spliceosome-%%-GO:0006396-&&-RNA processing-%%-GO:0008543-&&-fibroblast growth factor receptor signaling pathway-%%-GO:0010467-&&-gene expression-%%-GO:0043484-&&-regulation of RNA splicing","cellular_component-&-1&-GO:0016020-&&-membrane-%%-GO:0005829-&&-cytosol-%%-GO:0005634-&&-nucleus-%%-GO:0005654-&&-nucleoplasm-%%-GO:0071013-&&-catal…	[""]	HNRNPH1	Homo sapiens (Human)-&&-9606	taxon:9606	["Gene Symbol-&-1&-HNRNPH1"]	[""]	FALSE	81	91.7729	81
TMEM63B	TMEM63B	G:9606:TMEM63B	169997	1902	transmembrane protein 63B	gene	["biological_process-&-1&-GO:0006811-&&-ion transport","cellular_component-&-1&-GO:0005886-&&-plasma membrane-%%-GO:0016021-&&-integral component of membrane-%%-GO:0015629-&&-actin cytoskeleton","molecular_function-&-1&-GO:0000166-&&-nucleotide binding"]	[""]	TMEM63B	Homo sapiens (Human)-&&-9606	taxon:9606	["Gene Symbol-&-1&-TMEM63B"]	[""]	FALSE	30	30
HNRNPA2B1	HNRNPA2B1	G:9606:HNRNPA2B1	180242	1902	heterogeneous nuclear ribonucleoprotein A2/B1	gene	["biological_process-&-1&-GO:0000122-&&-negative regulation of transcription from RNA polymerase II promoter-%%-GO:0000398-&&-mRNA splicing, via spliceosome-%%-GO:0006397-&&-mRNA processing-%%-GO:0006406-&&-mRNA export from nucleus-%%-GO:0010467-&&-gene expression-%%-GO:0031053-&&-primary miRNA processing-%%-GO:0044806-&&-G-quadruplex DNA unwinding-%%-GO:0048025-&&-negative regulation of mRNA spl…	[""]	HNRNPA2B1	Homo sapiens (Human)-&&-9606	taxon:9606	["Gene Symbol-&-1&-HNRNPA2B1"]	[""]	FALSE	73	93.1498	73
HIST1H2BJ	HIST1H2BJ	G:9606:HIST1H2BJ	176147	1902	histone cluster 1 H2B family member j	gene	["biological_process-&-1&-GO:0002227-&&-innate immune response in mucosa-%%-GO:0006334-&&-nucleosome assembly-%%-GO:0016567-&&-protein ubiquitination-%%-GO:0050830-&&-defense response to Gram-positive bacterium-%%-GO:0019731-&&-antibacterial humoral response","cellular_component-&-1&-GO:0000786-&&-nucleosome-%%-GO:0005829-&&-cytosol-%%-GO:0005615-&&-extracellular space-%%-GO:0005634-&&-nucleus-%%…	["KEGG-&-1&-hsa05322-&&-Systemic lupus erythematosus-%%-hsa05203-&&-Viral carcinogenesis-%%-hsa05034-&&-Alcoholism"]	HIST1H2BJ	Homo sapiens (Human)-&&-9606	taxon:9606	["Gene Symbol-&-1&-HIST1H2BJ"]	[""]	FALSE	8	8
HNRNPA1	HNRNPA1	G:9606:HNRNPA1	180243	1902	heterogeneous nuclear ribonucleoprotein A1	gene	["biological_process-&-1&-GO:0000398-&&-mRNA splicing, via spliceosome-%%-GO:0006397-&&-mRNA processing-%%-GO:0006405-&&-RNA export from nucleus-%%-GO:0008543-&&-fibroblast growth factor receptor signaling pathway-%%-GO:0016032-&&-viral process-%%-GO:0010467-&&-gene expression-%%-GO:0032211-&&-negative regulation of telomere maintenance via telomerase-%%-GO:0032212-&&-positive regulation of telom…	["KEGG-&-1&-hsa03040-&&-Spliceosome"]	HNRNPA1	Homo sapiens (Human)-&&-9606	taxon:9606	["Gene Symbol-&-1&-HNRNPA1"]	[""]	FALSE	183	376.651	183
HNRNPC	HNRNPC	G:9606:HNRNPC	180240	1902	heterogeneous nuclear ribonucleoprotein C (C1/C2)	gene	["biological_process-&-1&-GO:0000398-&&-mRNA splicing, via spliceosome-%%-GO:0001649-&&-osteoblast differentiation-%%-GO:0008380-&&-RNA splicing-%%-GO:0010467-&&-gene expression-%%-GO:0032211-&&-negative regulation of telomere maintenance via telomerase-%%-GO:0043044-&&-ATP-dependent chromatin remodeling-%%-GO:0070935-&&-3'-UTR-mediated mRNA stabilization","cellular_component-&-1&-GO:0000790-&&-n…	["KEGG-&-1&-hsa03040-&&-Spliceosome"]	HNRNPC	Homo sapiens (Human)-&&-9606	taxon:9606	["Gene Symbol-&-1&-HNRNPC"]	[""]	FALSE	61	61.5255	61
PTPRS	PTPRS	G:9606:PTPRS	178193	1902	protein tyrosine phosphatase, receptor type S	gene	["biological_process-&-1&-GO:0007155-&&-cell adhesion-%%-GO:0006470-&&-protein dephosphorylation-%%-GO:0010977-&&-negative regulation of neuron projection development-%%-GO:0021510-&&-spinal cord development-%%-GO:0021549-&&-cerebellum development-%%-GO:0021766-&&-hippocampus development-%%-GO:0021987-&&-cerebral cortex development-%%-GO:0022038-&&-corpus callosum development-%%-GO:0030517-&&-neg…	[""]	PTPRS	Homo sapiens (Human)-&&-9606	taxon:9606	["Gene Symbol-&-1&-PTPRS"]	[""]	FALSE	7	7
NAA15	NAA15	G:9606:NAA15	167958	1902	N(alpha)-acetyltransferase 15, NatA auxiliary subunit	gene	["biological_process-&-1&-GO:0001525-&&-angiogenesis-%%-GO:0006351-&&-transcription, DNA-templated-%%-GO:0006474-&&-N-terminal protein amino acid acetylation-%%-GO:0043066-&&-negative regulation of apoptotic process-%%-GO:0045893-&&-positive regulation of transcription, DNA-templated-%%-GO:0050821-&&-protein stabilization-%%-GO:0017196-&&-N-terminal peptidyl-methionine acetylation-%%-GO:0030154-&…	[""]	NAA15	Homo sapiens (Human)-&&-9606	taxon:9606	["Gene Symbol-&-1&-NAA15"]	[""]	FALSE	16	16
AFF4	AFF4	G:9606:AFF4	172054	1902	AF4/FMR2 family member 4	gene	["biological_process-&-1&-GO:0006366-&&-transcription from RNA polymerase II promoter-%%-GO:0006355-&&-regulation of transcription, DNA-templated-%%-GO:0006368-&&-transcription elongation from RNA polymerase II promoter-%%-GO:0007286-&&-spermatid development","cellular_component-&-1&-GO:0001650-&&-fibrillar center-%%-GO:0005634-&&-nucleus-%%-GO:0005654-&&-nucleoplasm-%%-GO:0008023-&&-transcriptio…	[""]	AFF4	Homo sapiens (Human)-&&-9606	taxon:9606	["Gene Symbol-&-1&-AFF4"]	[""]	FALSE	7	7
PTPRK	PTPRK	G:9606:PTPRK	178199	1902	protein tyrosine phosphatase, receptor type K	gene	["biological_process-&-1&-GO:0007155-&&-cell adhesion-%%-GO:0007165-&&-signal transduction-%%-GO:0006470-&&-protein dephosphorylation-%%-GO:0007179-&&-transforming growth factor beta receptor signaling pathway-%%-GO:0008285-&&-negative regulation of cell proliferation-%%-GO:0010839-&&-negative regulation of keratinocyte proliferation-%%-GO:0016477-&&-cell migration-%%-GO:0045892-&&-negative regul…	[""]	PTPRK	Homo sapiens (Human)-&&-9606	taxon:9606	["Gene Symbol-&-1&-PTPRK"]	[""]	FALSE	21	21
HIST1H2AG	HIST1H2AG	G:9606:HIST1H2AG	176148	1902	histone cluster 1 H2A family member g	gene	["biological_process-&-1&-GO:0006342-&&-chromatin silencing-%%-GO:0008150-&&-biological_process","cellular_component-&-1&-GO:0000786-&&-nucleosome-%%-GO:0000790-&&-nuclear chromatin-%%-GO:0005634-&&-nucleus-%%-GO:0070062-&&-extracellular exosome","molecular_function-&-1&-GO:0005515-&&-protein binding-%%-GO:0003677-&&-DNA binding-%%-GO:0019899-&&-enzyme binding-%%-GO:0046982-&&-protein heterodimer…	["KEGG-&-1&-hsa05322-&&-Systemic lupus erythematosus-%%-hsa04217-&&-Necroptosis-%%-hsa05034-&&-Alcoholism"]	HIST1H2AG	Homo sapiens (Human)-&&-9606	taxon:9606	["Gene Symbol-&-1&-HIST1H2AG"]	[""]	FALSE	24	24
HIST1H3F	HIST1H3F	G:9606:HIST1H3F	176149	1902	histone cluster 1 H3 family member f	gene	["biological_process-&-1&-GO:0000183-&&-chromatin silencing at rDNA-%%-GO:0006334-&&-nucleosome assembly-%%-GO:0007596-&&-blood coagulation-%%-GO:0006325-&&-chromatin organization-%%-GO:0006335-&&-DNA replication-dependent nucleosome assembly-%%-GO:0031047-&&-gene silencing by RNA-%%-GO:0032200-&&-telomere organization-%%-GO:0044267-&&-cellular protein metabolic process-%%-GO:0045814-&&-negative …	["KEGG-&-1&-hsa05322-&&-Systemic lupus erythematosus-%%-hsa05034-&&-Alcoholism-%%-hsa05202-&&-Transcriptional misregulation in cancer"]	HIST1H3F	Homo sapiens (Human)-&&-9606	taxon:9606	["Gene Symbol-&-1&-HIST1H3F"]	[""]	FALSE	151	263.797	151
PTPRF	PTPRF	G:9606:PTPRF	178203	1902	protein tyrosine phosphatase, receptor type F	gene	["biological_process-&-1&-GO:0007155-&&-cell adhesion-%%-GO:0007185-&&-transmembrane receptor protein tyrosine phosphatase signaling pathway-%%-GO:0016477-&&-cell migration-%%-GO:0031102-&&-neuron projection regeneration-%%-GO:0035335-&&-peptidyl-tyrosine dephosphorylation-%%-GO:0048679-&&-regulation of axon regeneration-%%-GO:1900121-&&-negative regulation of receptor binding","cellular_componen…	["KEGG-&-1&-hsa04520-&&-Adherens junction-%%-hsa04931-&&-Insulin resistance-%%-hsa04514-&&-Cell adhesion molecules (CAMs)-%%-hsa04910-&&-Insulin signaling pathway"]	PTPRF	Homo sapiens (Human)-&&-9606	taxon:9606	["Gene Symbol-&-1&-PTPRF"]	[""]	FALSE	13	13
NR4A1	NR4A1	G:9606:NR4A1	180254	1902	nuclear receptor subfamily 4 group A member 1	gene	["biological_process-&-1&-GO:0001938-&&-positive regulation of endothelial cell proliferation-%%-GO:0002042-&&-cell migration involved in sprouting angiogenesis-%%-GO:0007165-&&-signal transduction-%%-GO:0006367-&&-transcription initiation from RNA polymerase II promoter-%%-GO:0030522-&&-intracellular receptor signaling pathway-%%-GO:0035767-&&-endothelial cell chemotaxis-%%-GO:0035924-&&-cellula…	["KEGG-&-1&-hsa04925-&&-Aldosterone synthesis and secretion-%%-hsa04151-&&-PI3K-Akt signaling pathway-%%-hsa04010-&&-MAPK signaling pathway-%%-hsa04934-&&-Cushing syndrome-%%-hsa04927-&&-Cortisol synthesis and secretion"]	NR4A1	Homo sapiens (Human)-&&-9606	taxon:9606	["Gene Symbol-&-1&-NR4A1"]	[""]	FALSE	43	43
FUBP3	FUBP3	G:9606:FUBP3	176156	1902	far upstream element binding protein 3	gene	["biological_process-&-1&-GO:0006366-&&-transcription from RNA polymerase II promoter-%%-GO:0006351-&&-transcription, DNA-templated-%%-GO:0010628-&&-positive regulation of gene expression-%%-GO:0045893-&&-positive regulation of transcription, DNA-templated-%%-GO:0045944-&&-positive regulation of transcription from RNA polymerase II promoter","cellular_component-&-1&-GO:0016020-&&-membrane-%%-GO:0…	[""]	FUBP3	Homo sapiens (Human)-&&-9606	taxon:9606	["Gene Symbol-&-1&-FUBP3"]	[""]	FALSE	24	24
HMGA1	HMGA1	G:9606:HMGA1	180258	1902	high mobility group AT-hook 1	gene	["biological_process-&-1&-GO:0006366-&&-transcription from RNA polymerase II promoter-%%-GO:0009615-&&-response to virus-%%-GO:0006268-&&-DNA unwinding involved in DNA replication-%%-GO:0006284-&&-base-excision repair-%%-GO:0006337-&&-nucleosome disassembly-%%-GO:0006355-&&-regulation of transcription, DNA-templated-%%-GO:0006461-&&-protein complex assembly-%%-GO:0008285-&&-negative regulation of…	[""]	HMGA1	Homo sapiens (Human)-&&-9606	taxon:9606	["Gene Symbol-&-1&-HMGA1"]	[""]	FALSE	41	41
CDC34	CDC34	G:9606:CDC34	182307	1902	cell division cycle 34	gene	["biological_process-&-1&-GO:0000082-&&-G1/S transition of mitotic cell cycle-%%-GO:0000209-&&-protein polyubiquitination-%%-GO:0016567-&&-protein ubiquitination-%%-GO:0006270-&&-DNA replication initiation-%%-GO:0006464-&&-cellular protein modification process-%%-GO:0035458-&&-cellular response to interferon-beta-%%-GO:0043161-&&-proteasome-mediated ubiquitin-dependent protein catabolic process-%…	["KEGG-&-1&-hsa04120-&&-Ubiquitin mediated proteolysis-%%-hsa05168-&&-Herpes simplex infection"]	CDC34	Homo sapiens (Human)-&&-9606	taxon:9606	["Gene Symbol-&-1&-CDC34"]	[""]	FALSE	17	17
HMOX1	HMOX1	G:9606:HMOX1	180256	1902	heme oxygenase 1	gene	["biological_process-&-1&-GO:0001525-&&-angiogenesis-%%-GO:0001935-&&-endothelial cell proliferation-%%-GO:0002246-&&-wound healing involved in inflammatory response-%%-GO:0002686-&&-negative regulation of leukocyte migration-%%-GO:0035556-&&-intracellular signal transduction-%%-GO:0006788-&&-heme oxidation-%%-GO:0006879-&&-cellular iron ion homeostasis-%%-GO:0006979-&&-response to oxidative stre…	["KEGG-&-1&-hsa00860-&&-Porphyrin and chlorophyll metabolism-%%-hsa05206-&&-MicroRNAs in cancer-%%-hsa04216-&&-Ferroptosis-%%-hsa05225-&&-Hepatocellular carcinoma-%%-hsa01100-&&-Metabolic pathways-%%-hsa04066-&&-HIF-1 signaling pathway-%%-hsa05418-&&-Fluid shear stress and atherosclerosis-%%-hsa05200-&&-Pathways in cancer-%%-hsa04978-&&-Mineral absorption"]	HMOX1	Homo sapiens (Human)-&&-9606	taxon:9606	["Gene Symbol-&-1&-HMOX1"]	["HMOX1"]	TRUE	22	22
NEU3	NEU3	G:9606:NEU3	174112	1902	neuraminidase 3	gene	["biological_process-&-1&-GO:0005975-&&-carbohydrate metabolic process-%%-GO:0006687-&&-glycosphingolipid metabolic process-%%-GO:0006689-&&-ganglioside catabolic process-%%-GO:0009313-&&-oligosaccharide catabolic process","cellular_component-&-1&-GO:0005886-&&-plasma membrane-%%-GO:0005887-&&-integral component of plasma membrane-%%-GO:0005737-&&-cytoplasm-%%-GO:0043231-&&-intracellular membrane…	["KEGG-&-1&-hsa00600-&&-Sphingolipid metabolism-%%-hsa00511-&&-Other glycan degradation"]	NEU3	Homo sapiens (Human)-&&-9606	taxon:9606	["Gene Symbol-&-1&-NEU3"]	[""]	FALSE	2	2
SYNJ2BP	SYNJ2BP	G:9606:SYNJ2BP	170023	1902	synaptojanin 2 binding protein	gene	["biological_process-&-1&-GO:0001937-&&-negative regulation of endothelial cell proliferation-%%-GO:0006605-&&-protein targeting-%%-GO:0007266-&&-Rho protein signal transduction-%%-GO:0008593-&&-regulation of Notch signaling pathway-%%-GO:0010596-&&-negative regulation of endothelial cell migration-%%-GO:0016525-&&-negative regulation of angiogenesis-%%-GO:0030100-&&-regulation of endocytosis-%%-…	[""]	SYNJ2BP	Homo sapiens (Human)-&&-9606	taxon:9606	["Gene Symbol-&-1&-SYNJ2BP"]	[""]	FALSE	6	6
BOLA2-SMG1P6	BOLA2-SMG1P6	G:9606:BOLA2-SMG1P6	127012	1902	BOLA2-SMG1P6 readthrough	gene	[""]	[""]	BOLA2-SMG1P6	Homo sapiens (Human)-&&-9606	taxon:9606	["Gene Symbol-&-1&-BOLA2-SMG1P6"]	[""]	FALSE	17	17
CACYBP	CACYBP	G:9606:CACYBP	172068	1902	calcyclin binding protein	gene	["biological_process-&-1&-GO:0007568-&&-aging-%%-GO:0045740-&&-positive regulation of DNA replication-%%-GO:0055007-&&-cardiac muscle cell differentiation-%%-GO:0060416-&&-response to growth hormone-%%-GO:0060548-&&-negative regulation of cell death-%%-GO:0071277-&&-cellular response to calcium ion","cellular_component-&-1&-GO:0005829-&&-cytosol-%%-GO:0005641-&&-nuclear envelope lumen-%%-GO:00056…	["KEGG-&-1&-hsa04310-&&-Wnt signaling pathway"]	CACYBP	Homo sapiens (Human)-&&-9606	taxon:9606	["Gene Symbol-&-1&-CACYBP"]	[""]	FALSE	29	29
PTPN11	PTPN11	G:9606:PTPN11	178213	1902	protein tyrosine phosphatase, non-receptor type 11	gene	["biological_process-&-1&-GO:0000077-&&-DNA damage checkpoint-%%-GO:0000187-&&-activation of MAPK activity-%%-GO:0006641-&&-triglyceride metabolic process-%%-GO:0007173-&&-epidermal growth factor receptor signaling pathway-%%-GO:0007229-&&-integrin-mediated signaling pathway-%%-GO:0007411-&&-axon guidance-%%-GO:0007420-&&-brain development-%%-GO:0007507-&&-heart development-%%-GO:0008543-&&-fibro…	["KEGG-&-1&-hsa04072-&&-Phospholipase D signaling pathway-%%-hsa05220-&&-Chronic myeloid leukemia-%%-hsa04722-&&-Neurotrophin signaling pathway-%%-hsa04920-&&-Adipocytokine signaling pathway-%%-hsa04014-&&-Ras signaling pathway-%%-hsa05205-&&-Proteoglycans in cancer-%%-hsa04931-&&-Insulin resistance-%%-hsa05211-&&-Renal cell carcinoma-%%-hsa05168-&&-Herpes simplex infection-%%-hsa04625-&&-C-type …	PTPN11	Homo sapiens (Human)-&&-9606	taxon:9606	["Gene Symbol-&-1&-PTPN11"]	[""]	FALSE	51	51
PTPN3	PTPN3	G:9606:PTPN3	178218	1902	protein tyrosine phosphatase, non-receptor type 3	gene	["biological_process-&-1&-GO:0006470-&&-protein dephosphorylation-%%-GO:0035335-&&-peptidyl-tyrosine dephosphorylation-%%-GO:0042059-&&-negative regulation of epidermal growth factor receptor signaling pathway-%%-GO:0045930-&&-negative regulation of mitotic cell cycle-%%-GO:0051045-&&-negative regulation of membrane protein ectodomain proteolysis-%%-GO:0097421-&&-liver regeneration-%%-GO:0098902-…	[""]	PTPN3	Homo sapiens (Human)-&&-9606	taxon:9606	["Gene Symbol-&-1&-PTPN3"]	[""]	FALSE	11	11
HMGN1	HMGN1	G:9606:HMGN1	180266	1902	high mobility group nucleosome binding domain 1	gene	["biological_process-&-1&-GO:0000720-&&-pyrimidine dimer repair by nucleotide-excision repair-%%-GO:0006283-&&-transcription-coupled nucleotide-excision repair-%%-GO:0006325-&&-chromatin organization-%%-GO:0006357-&&-regulation of transcription from RNA polymerase II promoter-%%-GO:0032786-&&-positive regulation of DNA-templated transcription, elongation-%%-GO:0010224-&&-response to UV-B-%%-GO:00…	["KEGG-&-1&-hsa05168-&&-Herpes simplex infection"]	HMGN1	Homo sapiens (Human)-&&-9606	taxon:9606	["Gene Symbol-&-1&-HMGN1"]	[""]	FALSE	7	7
CACNG4	CACNG4	G:9606:CACNG4	172075	1902	calcium voltage-gated channel auxiliary subunit gamma 4	gene	["biological_process-&-1&-GO:0006810-&&-transport-%%-GO:0019226-&&-transmission of nerve impulse-%%-GO:0051899-&&-membrane depolarization-%%-GO:0061337-&&-cardiac conduction-%%-GO:0070588-&&-calcium ion transmembrane transport-%%-GO:2000311-&&-regulation of AMPA receptor activity","cellular_component-&-1&-GO:0005886-&&-plasma membrane-%%-GO:0005887-&&-integral component of plasma membrane-%%-GO:0…	["KEGG-&-1&-hsa04921-&&-Oxytocin signaling pathway-%%-hsa04260-&&-Cardiac muscle contraction-%%-hsa05414-&&-Dilated cardiomyopathy (DCM)-%%-hsa04010-&&-MAPK signaling pathway-%%-hsa05412-&&-Arrhythmogenic right ventricular cardiomyopathy (ARVC)-%%-hsa04261-&&-Adrenergic signaling in cardiomyocytes-%%-hsa05410-&&-Hypertrophic cardiomyopathy (HCM)"]	CACNG4	Homo sapiens (Human)-&&-9606	taxon:9606	["Gene Symbol-&-1&-CACNG4"]	[""]	FALSE	1	1
TRAPPC3	TRAPPC3	G:9606:TRAPPC3	172072	1902	trafficking protein particle complex 3	gene	["biological_process-&-1&-GO:0043547-&&-positive regulation of GTPase activity-%%-GO:0048208-&&-COPII vesicle coating-%%-GO:0061024-&&-membrane organization","cellular_component-&-1&-GO:0000139-&&-Golgi membrane-%%-GO:0005829-&&-cytosol-%%-GO:0005783-&&-endoplasmic reticulum-%%-GO:0005794-&&-Golgi apparatus-%%-GO:0030008-&&-TRAPP complex","molecular_function-&-1&-GO:0005515-&&-protein binding-%%-…	[""]	TRAPPC3	Homo sapiens (Human)-&&-9606	taxon:9606	["Gene Symbol-&-1&-TRAPPC3"]	[""]	FALSE	6	6
PTPN6	PTPN6	G:9606:PTPN6	178216	1902	protein tyrosine phosphatase, non-receptor type 6	gene	["biological_process-&-1&-GO:0002244-&&-hematopoietic progenitor cell differentiation-%%-GO:0002924-&&-negative regulation of humoral immune response mediated by circulating immunoglobulin-%%-GO:0006915-&&-apoptotic process-%%-GO:0035556-&&-intracellular signal transduction-%%-GO:0006470-&&-protein dephosphorylation-%%-GO:0007186-&&-G-protein coupled receptor signaling pathway-%%-GO:0042267-&&-na…	["KEGG-&-1&-hsa04520-&&-Adherens junction-%%-hsa04662-&&-B cell receptor signaling pathway-%%-hsa05140-&&-Leishmaniasis-%%-hsa04630-&&-JAK-STAT signaling pathway-%%-hsa04660-&&-T cell receptor signaling pathway-%%-hsa04650-&&-Natural killer cell mediated cytotoxicity-%%-hsa05205-&&-Proteoglycans in cancer"]	PTPN6	Homo sapiens (Human)-&&-9606	taxon:9606	["Gene Symbol-&-1&-PTPN6"]	[""]	FALSE	36	36
CDC6	CDC6	G:9606:CDC6	182313	1902	cell division cycle 6	gene	["biological_process-&-1&-GO:0006260-&&-DNA replication-%%-GO:0000076-&&-DNA replication checkpoint-%%-GO:0000079-&&-regulation of cyclin-dependent protein serine/threonine kinase activity-%%-GO:0000082-&&-G1/S transition of mitotic cell cycle-%%-GO:0000083-&&-regulation of transcription involved in G1/S transition of mitotic cell cycle-%%-GO:0006270-&&-DNA replication initiation-%%-GO:0007067-&&…	["KEGG-&-1&-hsa04110-&&-Cell cycle"]	CDC6	Homo sapiens (Human)-&&-9606	taxon:9606	["Gene Symbol-&-1&-CDC6"]	[""]	FALSE	13	13
CDK1	CDK1	G:9606:CDK1	182318	1902	cyclin dependent kinase 1	gene	["biological_process-&-1&-GO:0006260-&&-DNA replication-%%-GO:0000082-&&-G1/S transition of mitotic cell cycle-%%-GO:0000083-&&-regulation of transcription involved in G1/S transition of mitotic cell cycle-%%-GO:0000086-&&-G2/M transition of mitotic cell cycle-%%-GO:0000187-&&-activation of MAPK activity-%%-GO:0042787-&&-protein ubiquitination involved in ubiquitin-dependent protein catabolic pro…	["KEGG-&-1&-hsa04540-&&-Gap junction-%%-hsa04110-&&-Cell cycle-%%-hsa04914-&&-Progesterone-mediated oocyte maturation-%%-hsa04115-&&-p53 signaling pathway-%%-hsa04218-&&-Cellular senescence-%%-hsa05168-&&-Herpes simplex infection-%%-hsa04114-&&-Oocyte meiosis-%%-hsa05203-&&-Viral carcinogenesis-%%-hsa05170-&&-Human immunodeficiency virus 1 infection"]	CDK1	Homo sapiens (Human)-&&-9606	taxon:9606	["Gene Symbol-&-1&-CDK1"]	[""]	FALSE	91	107.277	91
PTPN1	PTPN1	G:9606:PTPN1	178220	1902	protein tyrosine phosphatase, non-receptor type 1	gene	["biological_process-&-1&-GO:0006470-&&-protein dephosphorylation-%%-GO:0006987-&&-activation of signaling protein activity involved in unfolded protein response-%%-GO:0007257-&&-activation of JUN kinase activity-%%-GO:0008286-&&-insulin receptor signaling pathway-%%-GO:0009966-&&-regulation of signal transduction-%%-GO:0009968-&&-negative regulation of signal transduction-%%-GO:0030100-&&-regula…	["KEGG-&-1&-hsa04520-&&-Adherens junction-%%-hsa04931-&&-Insulin resistance-%%-hsa04910-&&-Insulin signaling pathway"]	PTPN1	Homo sapiens (Human)-&&-9606	taxon:9606	["Gene Symbol-&-1&-PTPN1"]	[""]	FALSE	40	40
HMGB1	HMGB1	G:9606:HMGB1	180269	1902	high mobility group box 1	gene	["biological_process-&-1&-GO:0000122-&&-negative regulation of transcription from RNA polymerase II promoter-%%-GO:0001773-&&-myeloid dendritic cell activation-%%-GO:0002218-&&-activation of innate immune response-%%-GO:0002224-&&-toll-like receptor signaling pathway-%%-GO:0002407-&&-dendritic cell chemotaxis-%%-GO:0002437-&&-inflammatory response to antigenic stimulus-%%-GO:0002643-&&-regulation…	["KEGG-&-1&-hsa03410-&&-Base excision repair-%%-hsa04140-&&-Autophagy - animal-%%-hsa04217-&&-Necroptosis"]	HMGB1	Homo sapiens (Human)-&&-9606	taxon:9606	["Gene Symbol-&-1&-HMGB1"]	[""]	FALSE	39	39
ABCF3	ABCF3	G:9606:ABCF3	170032	1902	ATP binding cassette subfamily F member 3	gene	["biological_process-&-1&-GO:0051607-&&-defense response to virus","cellular_component-&-1&-GO:0016020-&&-membrane","molecular_function-&-1&-GO:0005515-&&-protein binding-%%-GO:0005524-&&-ATP binding-%%-GO:0016887-&&-ATPase activity-%%-GO:0045296-&&-cadherin binding"]	[""]	ABCF3	Homo sapiens (Human)-&&-9606	taxon:9606	["Gene Symbol-&-1&-ABCF3"]	[""]	FALSE	7	7
CD81	CD81	G:9606:CD81	182324	1902	CD81 molecule	gene	["biological_process-&-1&-GO:0000187-&&-activation of MAPK activity-%%-GO:0008104-&&-protein localization-%%-GO:0007166-&&-cell surface receptor signaling pathway-%%-GO:0008283-&&-cell proliferation-%%-GO:0008284-&&-positive regulation of cell proliferation-%%-GO:0046718-&&-viral entry into host cell-%%-GO:0030890-&&-positive regulation of B cell proliferation-%%-GO:0031623-&&-receptor internaliz…	["KEGG-&-1&-hsa05144-&&-Malaria-%%-hsa04662-&&-B cell receptor signaling pathway-%%-hsa05160-&&-Hepatitis C"]	CD81	Homo sapiens (Human)-&&-9606	taxon:9606	["Gene Symbol-&-1&-CD81"]	[""]	FALSE	155	238.85	155
CD68	CD68	G:9606:CD68	182331	1902	CD68 molecule	gene	["biological_process-&-1&-GO:0043312-&&-neutrophil degranulation-%%-GO:0071310-&&-cellular response to organic substance","cellular_component-&-1&-GO:0005886-&&-plasma membrane-%%-GO:0016021-&&-integral component of membrane-%%-GO:0016020-&&-membrane-%%-GO:0010008-&&-endosome membrane-%%-GO:0035577-&&-azurophil granule membrane"]	["KEGG-&-1&-hsa04142-&&-Lysosome"]	CD68	Homo sapiens (Human)-&&-9606	taxon:9606	["Gene Symbol-&-1&-CD68"]	[""]	FALSE	4	4
SND1	SND1	G:9606:SND1	172094	1902	staphylococcal nuclease and tudor domain containing 1	gene	["biological_process-&-1&-GO:0001649-&&-osteoblast differentiation-%%-GO:0006351-&&-transcription, DNA-templated-%%-GO:0006355-&&-regulation of transcription, DNA-templated-%%-GO:0006401-&&-RNA catabolic process-%%-GO:0016032-&&-viral process-%%-GO:0031047-&&-gene silencing by RNA-%%-GO:0090305-&&-nucleic acid phosphodiester bond hydrolysis","cellular_component-&-1&-GO:0016020-&&-membrane-%%-GO:0…	["KEGG-&-1&-hsa05203-&&-Viral carcinogenesis"]	SND1	Homo sapiens (Human)-&&-9606	taxon:9606	["Gene Symbol-&-1&-SND1"]	[""]	FALSE	45	45
SEC31A	SEC31A	G:9606:SEC31A	174143	1902	SEC31 homolog A, COPII coat complex component	gene	["biological_process-&-1&-GO:0002474-&&-antigen processing and presentation of peptide antigen via MHC class I-%%-GO:0006888-&&-ER to Golgi vesicle-mediated transport-%%-GO:0015031-&&-protein transport-%%-GO:0019886-&&-antigen processing and presentation of exogenous peptide antigen via MHC class II-%%-GO:0036498-&&-IRE1-mediated unfolded protein response-%%-GO:0048208-&&-COPII vesicle coating-%%…	["KEGG-&-1&-hsa04141-&&-Protein processing in endoplasmic reticulum"]	SEC31A	Homo sapiens (Human)-&&-9606	taxon:9606	["Gene Symbol-&-1&-SEC31A"]	[""]	FALSE	12	12
KIF1A	KIF1A	G:9606:KIF1A	182338	1902	kinesin family member 1A	gene	["biological_process-&-1&-GO:0008089-&&-anterograde axonal transport","cellular_component-&-1&-GO:0005871-&&-kinesin complex-%%-GO:0005874-&&-microtubule-%%-GO:1904115-&&-axon cytoplasm","molecular_function-&-1&-GO:0003774-&&-motor activity-%%-GO:0003777-&&-microtubule motor activity-%%-GO:0005524-&&-ATP binding-%%-GO:0016887-&&-ATPase activity-%%-GO:0008017-&&-microtubule binding"]	[""]	KIF1A	Homo sapiens (Human)-&&-9606	taxon:9606	["Gene Symbol-&-1&-KIF1A"]	[""]	FALSE	12	12
PHB	PHB	G:9606:PHB	178243	1902	prohibitin	gene	["biological_process-&-1&-GO:0000122-&&-negative regulation of transcription from RNA polymerase II promoter-%%-GO:0001649-&&-osteoblast differentiation-%%-GO:0007165-&&-signal transduction-%%-GO:0006355-&&-regulation of transcription, DNA-templated-%%-GO:0007005-&&-mitochondrion organization-%%-GO:0008285-&&-negative regulation of cell proliferation-%%-GO:0010628-&&-positive regulation of gene e…	[""]	PHB	Homo sapiens (Human)-&&-9606	taxon:9606	["Gene Symbol-&-1&-PHB"]	[""]	FALSE	65	79.6706	65
SLC25A3	SLC25A3	G:9606:SLC25A3	178241	1902	solute carrier family 25 member 3	gene	["biological_process-&-1&-GO:0006810-&&-transport-%%-GO:0006839-&&-mitochondrial transport-%%-GO:0035435-&&-phosphate ion transmembrane transport","cellular_component-&-1&-GO:0016020-&&-membrane-%%-GO:0005739-&&-mitochondrion-%%-GO:0005887-&&-integral component of plasma membrane-%%-GO:0005743-&&-mitochondrial inner membrane-%%-GO:0043209-&&-myelin sheath-%%-GO:0070062-&&-extracellular exosome","…	[""]	SLC25A3	Homo sapiens (Human)-&&-9606	taxon:9606	["Gene Symbol-&-1&-SLC25A3"]	[""]	FALSE	43	43
ABCB1	ABCB1	G:9606:ABCB1	178245	1902	ATP binding cassette subfamily B member 1	gene	["biological_process-&-1&-GO:0000086-&&-G2/M transition of mitotic cell cycle-%%-GO:0006810-&&-transport-%%-GO:0006855-&&-drug transmembrane transport-%%-GO:0042493-&&-response to drug-%%-GO:0042908-&&-xenobiotic transport-%%-GO:0045332-&&-phospholipid translocation-%%-GO:0055085-&&-transmembrane transport-%%-GO:0072089-&&-stem cell proliferation-%%-GO:0099040-&&-ceramide translocation","cellular…	["KEGG-&-1&-hsa02010-&&-ABC transporters-%%-hsa05206-&&-MicroRNAs in cancer-%%-hsa05226-&&-Gastric cancer-%%-hsa04976-&&-Bile secretion"]	ABCB1	Homo sapiens (Human)-&&-9606	taxon:9606	["Gene Symbol-&-1&-ABCB1"]	[""]	FALSE	8	8
ATP5O	ATP5O	G:9606:ATP5O	182346	1902	ATP synthase, H+ transporting, mitochondrial F1 complex, O subunit	gene	["biological_process-&-1&-GO:0006754-&&-ATP biosynthetic process-%%-GO:0015992-&&-proton transport-%%-GO:0042776-&&-mitochondrial ATP synthesis coupled proton transport-%%-GO:0099132-&&-ATP hydrolysis coupled cation transmembrane transport","cellular_component-&-1&-GO:0005886-&&-plasma membrane-%%-GO:0005739-&&-mitochondrion-%%-GO:0005634-&&-nucleus-%%-GO:0005743-&&-mitochondrial inner membrane-%…	["KEGG-&-1&-hsa00190-&&-Oxidative phosphorylation-%%-hsa05016-&&-Huntington disease-%%-hsa05012-&&-Parkinson disease-%%-hsa05010-&&-Alzheimer disease-%%-hsa01100-&&-Metabolic pathways-%%-hsa04714-&&-Thermogenesis"]	ATP5O	Homo sapiens (Human)-&&-9606	taxon:9606	["Gene Symbol-&-1&-ATP5O"]	[""]	FALSE	29	29
FUBP1	FUBP1	G:9606:FUBP1	176203	1902	far upstream element binding protein 1	gene	["biological_process-&-1&-GO:0006366-&&-transcription from RNA polymerase II promoter-%%-GO:0006355-&&-regulation of transcription, DNA-templated-%%-GO:0010628-&&-positive regulation of gene expression","cellular_component-&-1&-GO:0005634-&&-nucleus","molecular_function-&-1&-GO:0005515-&&-protein binding-%%-GO:0003697-&&-single-stranded DNA binding-%%-GO:0003700-&&-transcription factor activity, …	[""]	FUBP1	Homo sapiens (Human)-&&-9606	taxon:9606	["Gene Symbol-&-1&-FUBP1"]	[""]	FALSE	30	30
MMGT1	MMGT1	G:9606:MMGT1	165963	1902	membrane magnesium transporter 1	gene	["biological_process-&-1&-GO:0015693-&&-magnesium ion transport-%%-GO:0098655-&&-cation transmembrane transport-%%-GO:1903830-&&-magnesium ion transmembrane transport","cellular_component-&-1&-GO:0005886-&&-plasma membrane-%%-GO:0000139-&&-Golgi membrane-%%-GO:0016021-&&-integral component of membrane-%%-GO:0016020-&&-membrane-%%-GO:0005769-&&-early endosome-%%-GO:0005794-&&-Golgi apparatus-%%-GO…	[""]	MMGT1	Homo sapiens (Human)-&&-9606	taxon:9606	["Gene Symbol-&-1&-MMGT1"]	[""]	FALSE	24	24
SYCE1	SYCE1	G:9606:SYCE1	165961	1902	synaptonemal complex central element protein 1	gene	["biological_process-&-1&-GO:0007130-&&-synaptonemal complex assembly-%%-GO:0051301-&&-cell division","cellular_component-&-1&-GO:0000801-&&-central element","molecular_function-&-1&-GO:0005515-&&-protein binding"]	[""]	SYCE1	Homo sapiens (Human)-&&-9606	taxon:9606	["Gene Symbol-&-1&-SYCE1"]	[""]	FALSE	4	4
PGF	PGF	G:9606:PGF	178255	1902	placental growth factor	gene	["biological_process-&-1&-GO:0001525-&&-angiogenesis-%%-GO:0001658-&&-branching involved in ureteric bud morphogenesis-%%-GO:0001666-&&-response to hypoxia-%%-GO:0001938-&&-positive regulation of endothelial cell proliferation-%%-GO:0002040-&&-sprouting angiogenesis-%%-GO:0007267-&&-cell-cell signaling-%%-GO:0007165-&&-signal transduction-%%-GO:0007565-&&-female pregnancy-%%-GO:0008284-&&-positiv…	["KEGG-&-1&-hsa04015-&&-Rap1 signaling pathway-%%-hsa04510-&&-Focal adhesion-%%-hsa04151-&&-PI3K-Akt signaling pathway-%%-hsa04010-&&-MAPK signaling pathway-%%-hsa05200-&&-Pathways in cancer-%%-hsa04014-&&-Ras signaling pathway"]	PGF	Homo sapiens (Human)-&&-9606	taxon:9606	["Gene Symbol-&-1&-PGF"]	[""]	FALSE	4	4
SQSTM1	SQSTM1	G:9606:SQSTM1	176205	1902	sequestosome 1	gene	["biological_process-&-1&-GO:0000122-&&-negative regulation of transcription from RNA polymerase II promoter-%%-GO:0000422-&&-mitophagy-%%-GO:0001934-&&-positive regulation of protein phosphorylation-%%-GO:0002376-&&-immune system process-%%-GO:0006915-&&-apoptotic process-%%-GO:0035556-&&-intracellular signal transduction-%%-GO:0008104-&&-protein localization-%%-GO:0006468-&&-protein phosphoryla…	["KEGG-&-1&-hsa04137-&&-Mitophagy - animal-%%-hsa04218-&&-Cellular senescence-%%-hsa05418-&&-Fluid shear stress and atherosclerosis-%%-hsa04217-&&-Necroptosis-%%-hsa04380-&&-Osteoclast differentiation"]	SQSTM1	Homo sapiens (Human)-&&-9606	taxon:9606	["Gene Symbol-&-1&-SQSTM1"]	[""]	FALSE	65	44.271	65
HLA-B	HLA-B	G:9606:HLA-B	180306	1902	major histocompatibility complex, class I, B	gene	["biological_process-&-1&-GO:0002474-&&-antigen processing and presentation of peptide antigen via MHC class I-%%-GO:0002479-&&-antigen processing and presentation of exogenous peptide antigen via MHC class I, TAP-dependent-%%-GO:0002480-&&-antigen processing and presentation of exogenous peptide antigen via MHC class I, TAP-independent-%%-GO:0016032-&&-viral process-%%-GO:0050776-&&-regulation o…	["KEGG-&-1&-hsa04144-&&-Endocytosis-%%-hsa05330-&&-Allograft rejection-%%-hsa04940-&&-Type I diabetes mellitus-%%-hsa04218-&&-Cellular senescence-%%-hsa05332-&&-Graft-versus-host disease-%%-hsa05165-&&-Human papillomavirus infection-%%-hsa05169-&&-Epstein-Barr virus infection-%%-hsa05203-&&-Viral carcinogenesis-%%-hsa05320-&&-Autoimmune thyroid disease-%%-hsa05163-&&-Human cytomegalovirus infecti…	HLA-B	Homo sapiens (Human)-&&-9606	taxon:9606	["Gene Symbol-&-1&-HLA-B"]	[""]	FALSE	111	85.6034	111
ATP6V1C1	ATP6V1C1	G:9606:ATP6V1C1	182353	1902	ATPase H+ transporting V1 subunit C1	gene	["biological_process-&-1&-GO:0008286-&&-insulin receptor signaling pathway-%%-GO:0015992-&&-proton transport-%%-GO:0015991-&&-ATP hydrolysis coupled proton transport-%%-GO:0016241-&&-regulation of macroautophagy-%%-GO:0033572-&&-transferrin transport-%%-GO:0034220-&&-ion transmembrane transport-%%-GO:0090383-&&-phagosome acidification","cellular_component-&-1&-GO:0005886-&&-plasma membrane-%%-GO:…	["KEGG-&-1&-hsa05323-&&-Rheumatoid arthritis-%%-hsa00190-&&-Oxidative phosphorylation-%%-hsa04150-&&-mTOR signaling pathway-%%-hsa04145-&&-Phagosome-%%-hsa04721-&&-Synaptic vesicle cycle-%%-hsa05120-&&-Epithelial cell signaling in Helicobacter pylori infection-%%-hsa05165-&&-Human papillomavirus infection-%%-hsa05110-&&-Vibrio cholerae infection-%%-hsa01100-&&-Metabolic pathways-%%-hsa04966-&&-Co…	ATP6V1C1	Homo sapiens (Human)-&&-9606	taxon:9606	["Gene Symbol-&-1&-ATP6V1C1"]	[""]	FALSE	10	10
HLA-C	HLA-C	G:9606:HLA-C	180305	1902	major histocompatibility complex, class I, C	gene	["biological_process-&-1&-GO:0002474-&&-antigen processing and presentation of peptide antigen via MHC class I-%%-GO:0002479-&&-antigen processing and presentation of exogenous peptide antigen via MHC class I, TAP-dependent-%%-GO:0002480-&&-antigen processing and presentation of exogenous peptide antigen via MHC class I, TAP-independent-%%-GO:0016032-&&-viral process-%%-GO:0050776-&&-regulation o…	["KEGG-&-1&-hsa05330-&&-Allograft rejection-%%-hsa04144-&&-Endocytosis-%%-hsa04940-&&-Type I diabetes mellitus-%%-hsa04218-&&-Cellular senescence-%%-hsa05332-&&-Graft-versus-host disease-%%-hsa05165-&&-Human papillomavirus infection-%%-hsa05169-&&-Epstein-Barr virus infection-%%-hsa05203-&&-Viral carcinogenesis-%%-hsa05320-&&-Autoimmune thyroid disease-%%-hsa04612-&&-Antigen processing and presen…	HLA-C	Homo sapiens (Human)-&&-9606	taxon:9606	["Gene Symbol-&-1&-HLA-C"]	[""]	FALSE	33	33
PFN1	PFN1	G:9606:PFN1	178263	1902	profilin 1	gene	["biological_process-&-1&-GO:0001843-&&-neural tube closure-%%-GO:0030036-&&-actin cytoskeleton organization-%%-GO:0010634-&&-positive regulation of epithelial cell migration-%%-GO:0050821-&&-protein stabilization-%%-GO:0030837-&&-negative regulation of actin filament polymerization-%%-GO:0030838-&&-positive regulation of actin filament polymerization-%%-GO:0032232-&&-negative regulation of actin…	["KEGG-&-1&-hsa05132-&&-Salmonella infection-%%-hsa05131-&&-Shigellosis-%%-hsa04810-&&-Regulation of actin cytoskeleton-%%-hsa04015-&&-Rap1 signaling pathway"]	PFN1	Homo sapiens (Human)-&&-9606	taxon:9606	["Gene Symbol-&-1&-PFN1"]	[""]	FALSE	26	26
ATP5I	ATP5I	G:9606:ATP5I	182359	1902	ATP synthase, H+ transporting, mitochondrial Fo complex subunit E	gene	["biological_process-&-1&-GO:0006754-&&-ATP biosynthetic process-%%-GO:0042776-&&-mitochondrial ATP synthesis coupled proton transport","cellular_component-&-1&-GO:0000276-&&-mitochondrial proton-transporting ATP synthase complex, coupling factor F(o)-%%-GO:0005739-&&-mitochondrion-%%-GO:0005743-&&-mitochondrial inner membrane-%%-GO:0005753-&&-mitochondrial proton-transporting ATP synthase comple…	["KEGG-&-1&-hsa00190-&&-Oxidative phosphorylation-%%-hsa01100-&&-Metabolic pathways-%%-hsa04714-&&-Thermogenesis"]	ATP5I	Homo sapiens (Human)-&&-9606	taxon:9606	["Gene Symbol-&-1&-ATP5I"]	[""]	FALSE	15	15
RPLP2	RPLP2	G:9606:RPLP2	178266	1902	ribosomal protein lateral stalk subunit P2	gene	["biological_process-&-1&-GO:0000184-&&-nuclear-transcribed mRNA catabolic process, nonsense-mediated decay-%%-GO:0002181-&&-cytoplasmic translation-%%-GO:0006364-&&-rRNA processing-%%-GO:0006412-&&-translation-%%-GO:0006413-&&-translational initiation-%%-GO:0006414-&&-translational elongation-%%-GO:0006614-&&-SRP-dependent cotranslational protein targeting to membrane-%%-GO:0019083-&&-viral tran…	["KEGG-&-1&-hsa03010-&&-Ribosome"]	RPLP2	Homo sapiens (Human)-&&-9606	taxon:9606	["Gene Symbol-&-1&-RPLP2"]	[""]	FALSE	87	113.583	87
RPLP1	RPLP1	G:9606:RPLP1	178267	1902	ribosomal protein lateral stalk subunit P1	gene	["biological_process-&-1&-GO:0000184-&&-nuclear-transcribed mRNA catabolic process, nonsense-mediated decay-%%-GO:0002181-&&-cytoplasmic translation-%%-GO:0006364-&&-rRNA processing-%%-GO:0006412-&&-translation-%%-GO:0006413-&&-translational initiation-%%-GO:0006414-&&-translational elongation-%%-GO:0006614-&&-SRP-dependent cotranslational protein targeting to membrane-%%-GO:0019083-&&-viral tran…	["KEGG-&-1&-hsa03010-&&-Ribosome"]	RPLP1	Homo sapiens (Human)-&&-9606	taxon:9606	["Gene Symbol-&-1&-RPLP1"]	[""]	FALSE	78	59.8117	78
MRPL12	MRPL12	G:9606:MRPL12	178265	1902	mitochondrial ribosomal protein L12	gene	["biological_process-&-1&-GO:0006390-&&-transcription from mitochondrial promoter-%%-GO:0045893-&&-positive regulation of transcription, DNA-templated-%%-GO:0070125-&&-mitochondrial translational elongation-%%-GO:0070126-&&-mitochondrial translational termination","cellular_component-&-1&-GO:0005739-&&-mitochondrion-%%-GO:0005743-&&-mitochondrial inner membrane-%%-GO:0005762-&&-mitochondrial larg…	["KEGG-&-1&-hsa03010-&&-Ribosome"]	MRPL12	Homo sapiens (Human)-&&-9606	taxon:9606	["Gene Symbol-&-1&-MRPL12"]	[""]	FALSE	17	17
ATP5C1	ATP5C1	G:9606:ATP5C1	182367	1902	ATP synthase, H+ transporting, mitochondrial F1 complex, gamma polypeptide 1	gene	["biological_process-&-1&-GO:0006119-&&-oxidative phosphorylation-%%-GO:0006754-&&-ATP biosynthetic process-%%-GO:0042776-&&-mitochondrial ATP synthesis coupled proton transport-%%-GO:0099132-&&-ATP hydrolysis coupled cation transmembrane transport","cellular_component-&-1&-GO:0000275-&&-mitochondrial proton-transporting ATP synthase complex, catalytic core F(1)-%%-GO:0016020-&&-membrane-%%-GO:00…	["KEGG-&-1&-hsa00190-&&-Oxidative phosphorylation-%%-hsa05016-&&-Huntington disease-%%-hsa05012-&&-Parkinson disease-%%-hsa05010-&&-Alzheimer disease-%%-hsa01100-&&-Metabolic pathways-%%-hsa04714-&&-Thermogenesis"]	ATP5C1	Homo sapiens (Human)-&&-9606	taxon:9606	["Gene Symbol-&-1&-ATP5C1"]	[""]	FALSE	31	31
PABPC1	PABPC1	G:9606:PABPC1	172127	1902	poly(A) binding protein cytoplasmic 1	gene	["biological_process-&-1&-GO:0000184-&&-nuclear-transcribed mRNA catabolic process, nonsense-mediated decay-%%-GO:0000289-&&-nuclear-transcribed mRNA poly(A) tail shortening-%%-GO:0000398-&&-mRNA splicing, via spliceosome-%%-GO:0006378-&&-mRNA polyadenylation-%%-GO:0006413-&&-translational initiation-%%-GO:0045727-&&-positive regulation of translation-%%-GO:0031047-&&-gene silencing by RNA-%%-GO:…	["KEGG-&-1&-hsa03013-&&-RNA transport-%%-hsa03015-&&-mRNA surveillance pathway-%%-hsa03018-&&-RNA degradation"]	PABPC1	Homo sapiens (Human)-&&-9606	taxon:9606	["Gene Symbol-&-1&-PABPC1"]	[""]	FALSE	114	199.331	114
RPLP0	RPLP0	G:9606:RPLP0	178268	1902	ribosomal protein lateral stalk subunit P0	gene	["biological_process-&-1&-GO:0000184-&&-nuclear-transcribed mRNA catabolic process, nonsense-mediated decay-%%-GO:0006364-&&-rRNA processing-%%-GO:0006412-&&-translation-%%-GO:0006413-&&-translational initiation-%%-GO:0006614-&&-SRP-dependent cotranslational protein targeting to membrane-%%-GO:0019083-&&-viral transcription-%%-GO:0071353-&&-cellular response to interleukin-4","cellular_component-…	["KEGG-&-1&-hsa03010-&&-Ribosome"]	RPLP0	Homo sapiens (Human)-&&-9606	taxon:9606	["Gene Symbol-&-1&-RPLP0"]	[""]	FALSE	121	215.468	121
ATP5F1	ATP5F1	G:9606:ATP5F1	182364	1902	ATP synthase, H+ transporting, mitochondrial Fo complex subunit B1	gene	["biological_process-&-1&-GO:0006754-&&-ATP biosynthetic process-%%-GO:0015986-&&-ATP synthesis coupled proton transport-%%-GO:0021762-&&-substantia nigra development-%%-GO:0042776-&&-mitochondrial ATP synthesis coupled proton transport-%%-GO:0099132-&&-ATP hydrolysis coupled cation transmembrane transport","cellular_component-&-1&-GO:0000276-&&-mitochondrial proton-transporting ATP synthase comp…	["KEGG-&-1&-hsa00190-&&-Oxidative phosphorylation-%%-hsa05016-&&-Huntington disease-%%-hsa05012-&&-Parkinson disease-%%-hsa05010-&&-Alzheimer disease-%%-hsa01100-&&-Metabolic pathways-%%-hsa04714-&&-Thermogenesis"]	ATP5F1	Homo sapiens (Human)-&&-9606	taxon:9606	["Gene Symbol-&-1&-ATP5F1"]	[""]	FALSE	28	28
RPL38	RPL38	G:9606:RPL38	178274	1902	ribosomal protein L38	gene	["biological_process-&-1&-GO:0000184-&&-nuclear-transcribed mRNA catabolic process, nonsense-mediated decay-%%-GO:0001501-&&-skeletal system development-%%-GO:0001503-&&-ossification-%%-GO:0006364-&&-rRNA processing-%%-GO:0006412-&&-translation-%%-GO:0006413-&&-translational initiation-%%-GO:0006417-&&-regulation of translation-%%-GO:0006614-&&-SRP-dependent cotranslational protein targeting to m…	["KEGG-&-1&-hsa03010-&&-Ribosome"]	RPL38	Homo sapiens (Human)-&&-9606	taxon:9606	["Gene Symbol-&-1&-RPL38"]	[""]	FALSE	79	53.91	79
NRG1	NRG1	G:9606:NRG1	180320	1902	neuregulin 1	gene	["biological_process-&-1&-GO:0000165-&&-MAPK cascade-%%-GO:0000187-&&-activation of MAPK activity-%%-GO:0000902-&&-cell morphogenesis-%%-GO:0001964-&&-startle response-%%-GO:0003161-&&-cardiac conduction system development-%%-GO:0003222-&&-ventricular trabecula myocardium morphogenesis-%%-GO:0007154-&&-cell communication-%%-GO:0007171-&&-activation of transmembrane receptor protein tyrosine kinas…	["KEGG-&-1&-hsa01521-&&-EGFR tyrosine kinase inhibitor resistance-%%-hsa04012-&&-ErbB signaling pathway"]	NRG1	Homo sapiens (Human)-&&-9606	taxon:9606	["Gene Symbol-&-1&-NRG1"]	[""]	FALSE	5	5
CEP162	CEP162	G:9606:CEP162	174176	1902	centrosomal protein 162	gene	["biological_process-&-1&-GO:0060271-&&-cilium assembly-%%-GO:0097711-&&-ciliary basal body docking","cellular_component-&-1&-GO:0005829-&&-cytosol-%%-GO:0005634-&&-nucleus-%%-GO:0005813-&&-centrosome-%%-GO:0005814-&&-centriole-%%-GO:0005819-&&-spindle-%%-GO:0005879-&&-axonemal microtubule","molecular_function-&-1&-GO:0005515-&&-protein binding"]	[""]	CEP162	Homo sapiens (Human)-&&-9606	taxon:9606	["Gene Symbol-&-1&-CEP162"]	[""]	FALSE	15	15
ATP5B	ATP5B	G:9606:ATP5B	182369	1902	ATP synthase, H+ transporting, mitochondrial F1 complex, beta polypeptide	gene	["biological_process-&-1&-GO:0001525-&&-angiogenesis-%%-GO:0001649-&&-osteoblast differentiation-%%-GO:0006091-&&-generation of precursor metabolites and energy-%%-GO:0006629-&&-lipid metabolic process-%%-GO:0006754-&&-ATP biosynthetic process-%%-GO:0006933-&&-negative regulation of cell adhesion involved in substrate-bound cell migration-%%-GO:0007005-&&-mitochondrion organization-%%-GO:0015992-…	["KEGG-&-1&-hsa00190-&&-Oxidative phosphorylation-%%-hsa05016-&&-Huntington disease-%%-hsa05012-&&-Parkinson disease-%%-hsa05010-&&-Alzheimer disease-%%-hsa01100-&&-Metabolic pathways-%%-hsa04714-&&-Thermogenesis"]	ATP5B	Homo sapiens (Human)-&&-9606	taxon:9606	["Gene Symbol-&-1&-ATP5B"]	[""]	FALSE	60	60
RPL35A	RPL35A	G:9606:RPL35A	178278	1902	ribosomal protein L35a	gene	["biological_process-&-1&-GO:0000184-&&-nuclear-transcribed mRNA catabolic process, nonsense-mediated decay-%%-GO:0006364-&&-rRNA processing-%%-GO:0006412-&&-translation-%%-GO:0006413-&&-translational initiation-%%-GO:0006614-&&-SRP-dependent cotranslational protein targeting to membrane-%%-GO:0019083-&&-viral transcription-%%-GO:0042273-&&-ribosomal large subunit biogenesis","cellular_component-…	["KEGG-&-1&-hsa03010-&&-Ribosome"]	RPL35A	Homo sapiens (Human)-&&-9606	taxon:9606	["Gene Symbol-&-1&-RPL35A"]	[""]	FALSE	62	10.1464	62
ATP4A	ATP4A	G:9606:ATP4A	182374	1902	ATPase H+/K+ transporting alpha subunit	gene	["biological_process-&-1&-GO:0006810-&&-transport-%%-GO:0006813-&&-potassium ion transport-%%-GO:0006814-&&-sodium ion transport-%%-GO:0010248-&&-establishment or maintenance of transmembrane electrochemical gradient-%%-GO:0015991-&&-ATP hydrolysis coupled proton transport-%%-GO:0034220-&&-ion transmembrane transport","cellular_component-&-1&-GO:0005886-&&-plasma membrane-%%-GO:0005887-&&-integra…	["KEGG-&-1&-hsa00190-&&-Oxidative phosphorylation-%%-hsa04971-&&-Gastric acid secretion-%%-hsa04966-&&-Collecting duct acid secretion"]	ATP4A	Homo sapiens (Human)-&&-9606	taxon:9606	["Gene Symbol-&-1&-ATP4A"]	[""]	FALSE	18	18
ATP2B4	ATP2B4	G:9606:ATP2B4	182375	1902	ATPase plasma membrane Ca2+ transporting 4	gene	["biological_process-&-1&-GO:0003407-&&-neural retina development-%%-GO:0006357-&&-regulation of transcription from RNA polymerase II promoter-%%-GO:0006874-&&-cellular calcium ion homeostasis-%%-GO:0007283-&&-spermatogenesis-%%-GO:0010751-&&-negative regulation of nitric oxide mediated signal transduction-%%-GO:0021766-&&-hippocampus development-%%-GO:0030317-&&-flagellated sperm motility-%%-GO:…	["KEGG-&-1&-hsa04024-&&-cAMP signaling pathway-%%-hsa04925-&&-Aldosterone synthesis and secretion-%%-hsa04970-&&-Salivary secretion-%%-hsa04020-&&-Calcium signaling pathway-%%-hsa04022-&&-cGMP-PKG signaling pathway-%%-hsa04972-&&-Pancreatic secretion-%%-hsa04261-&&-Adrenergic signaling in cardiomyocytes"]	ATP2B4	Homo sapiens (Human)-&&-9606	taxon:9606	["Gene Symbol-&-1&-ATP2B4"]	[""]	FALSE	19	19
CFH	CFH	G:9606:CFH	180327	1902	complement factor H	gene	["biological_process-&-1&-GO:0006956-&&-complement activation-%%-GO:0006957-&&-complement activation, alternative pathway-%%-GO:0030449-&&-regulation of complement activation","cellular_component-&-1&-GO:0005576-&&-extracellular region-%%-GO:0005615-&&-extracellular space-%%-GO:0070062-&&-extracellular exosome-%%-GO:0072562-&&-blood microparticle","molecular_function-&-1&-GO:0005515-&&-protein bi…	["KEGG-&-1&-hsa05150-&&-Staphylococcus aureus infection-%%-hsa04610-&&-Complement and coagulation cascades"]	CFH	Homo sapiens (Human)-&&-9606	taxon:9606	["Gene Symbol-&-1&-CFH"]	[""]	FALSE	9	9
ATP5A1	ATP5A1	G:9606:ATP5A1	182372	1902	ATP synthase, H+ transporting, mitochondrial F1 complex, alpha subunit 1, cardiac muscle	gene	["biological_process-&-1&-GO:0001937-&&-negative regulation of endothelial cell proliferation-%%-GO:0006629-&&-lipid metabolic process-%%-GO:0006754-&&-ATP biosynthetic process-%%-GO:0009790-&&-embryo development-%%-GO:0042776-&&-mitochondrial ATP synthesis coupled proton transport-%%-GO:0099132-&&-ATP hydrolysis coupled cation transmembrane transport","cellular_component-&-1&-GO:0005886-&&-plasm…	["KEGG-&-1&-hsa00190-&&-Oxidative phosphorylation-%%-hsa05016-&&-Huntington disease-%%-hsa05012-&&-Parkinson disease-%%-hsa05010-&&-Alzheimer disease-%%-hsa01100-&&-Metabolic pathways-%%-hsa04714-&&-Thermogenesis"]	ATP5A1	Homo sapiens (Human)-&&-9606	taxon:9606	["Gene Symbol-&-1&-ATP5A1"]	[""]	FALSE	65	53.3	65
HDAC3	HDAC3	G:9606:HDAC3	176234	1902	histone deacetylase 3	gene	["biological_process-&-1&-GO:0000122-&&-negative regulation of transcription from RNA polymerase II promoter-%%-GO:0001934-&&-positive regulation of protein phosphorylation-%%-GO:0006325-&&-chromatin organization-%%-GO:0006351-&&-transcription, DNA-templated-%%-GO:0006476-&&-protein deacetylation-%%-GO:0007623-&&-circadian rhythm-%%-GO:0043066-&&-negative regulation of apoptotic process-%%-GO:001…	["KEGG-&-1&-hsa04919-&&-Thyroid hormone signaling pathway-%%-hsa05203-&&-Viral carcinogenesis-%%-hsa05034-&&-Alcoholism"]	HDAC3	Homo sapiens (Human)-&&-9606	taxon:9606	["Gene Symbol-&-1&-HDAC3"]	[""]	FALSE	85	156.564	85
RPL31	RPL31	G:9606:RPL31	178282	1902	ribosomal protein L31	gene	["biological_process-&-1&-GO:0000184-&&-nuclear-transcribed mRNA catabolic process, nonsense-mediated decay-%%-GO:0006364-&&-rRNA processing-%%-GO:0006412-&&-translation-%%-GO:0006413-&&-translational initiation-%%-GO:0006614-&&-SRP-dependent cotranslational protein targeting to membrane-%%-GO:0019083-&&-viral transcription","cellular_component-&-1&-GO:0022625-&&-cytosolic large ribosomal subunit…	["KEGG-&-1&-hsa03010-&&-Ribosome"]	RPL31	Homo sapiens (Human)-&&-9606	taxon:9606	["Gene Symbol-&-1&-RPL31"]	[""]	FALSE	109	149.138	109
RPL30	RPL30	G:9606:RPL30	178286	1902	ribosomal protein L30	gene	["biological_process-&-1&-GO:0000184-&&-nuclear-transcribed mRNA catabolic process, nonsense-mediated decay-%%-GO:0006364-&&-rRNA processing-%%-GO:0006412-&&-translation-%%-GO:0006413-&&-translational initiation-%%-GO:0006614-&&-SRP-dependent cotranslational protein targeting to membrane-%%-GO:0019083-&&-viral transcription-%%-GO:0097421-&&-liver regeneration-%%-GO:1904571-&&-positive regulation …	["KEGG-&-1&-hsa03010-&&-Ribosome"]	RPL30	Homo sapiens (Human)-&&-9606	taxon:9606	["Gene Symbol-&-1&-RPL30"]	[""]	FALSE	84	70.3457	84
RPL27	RPL27	G:9606:RPL27	178287	1902	ribosomal protein L27	gene	["biological_process-&-1&-GO:0000184-&&-nuclear-transcribed mRNA catabolic process, nonsense-mediated decay-%%-GO:0006364-&&-rRNA processing-%%-GO:0006412-&&-translation-%%-GO:0006413-&&-translational initiation-%%-GO:0006614-&&-SRP-dependent cotranslational protein targeting to membrane-%%-GO:0019083-&&-viral transcription","cellular_component-&-1&-GO:0022625-&&-cytosolic large ribosomal subunit…	["KEGG-&-1&-hsa03010-&&-Ribosome"]	RPL27	Homo sapiens (Human)-&&-9606	taxon:9606	["Gene Symbol-&-1&-RPL27"]	[""]	FALSE	94	87.4474	94
ATP2A2	ATP2A2	G:9606:ATP2A2	182380	1902	ATPase sarcoplasmic/endoplasmic reticulum Ca2+ transporting 2	gene	["biological_process-&-1&-GO:0002026-&&-regulation of the force of heart contraction-%%-GO:0007155-&&-cell adhesion-%%-GO:0006984-&&-ER-nucleus signaling pathway-%%-GO:0006996-&&-organelle organization-%%-GO:0008544-&&-epidermis development-%%-GO:0010460-&&-positive regulation of heart rate-%%-GO:0010882-&&-regulation of cardiac muscle contraction by calcium ion signaling-%%-GO:0014883-&&-transit…	["KEGG-&-1&-hsa04024-&&-cAMP signaling pathway-%%-hsa04260-&&-Cardiac muscle contraction-%%-hsa04020-&&-Calcium signaling pathway-%%-hsa05414-&&-Dilated cardiomyopathy (DCM)-%%-hsa04022-&&-cGMP-PKG signaling pathway-%%-hsa05010-&&-Alzheimer disease-%%-hsa04919-&&-Thyroid hormone signaling pathway-%%-hsa04972-&&-Pancreatic secretion-%%-hsa05412-&&-Arrhythmogenic right ventricular cardiomyopathy (A…	ATP2A2	Homo sapiens (Human)-&&-9606	taxon:9606	["Gene Symbol-&-1&-ATP2A2"]	[""]	FALSE	27	27
RPL27A	RPL27A	G:9606:RPL27A	178285	1902	ribosomal protein L27a	gene	["biological_process-&-1&-GO:0000184-&&-nuclear-transcribed mRNA catabolic process, nonsense-mediated decay-%%-GO:0006364-&&-rRNA processing-%%-GO:0006412-&&-translation-%%-GO:0006413-&&-translational initiation-%%-GO:0006614-&&-SRP-dependent cotranslational protein targeting to membrane-%%-GO:0019083-&&-viral transcription","cellular_component-&-1&-GO:0022625-&&-cytosolic large ribosomal subunit…	["KEGG-&-1&-hsa03010-&&-Ribosome"]	RPL27A	Homo sapiens (Human)-&&-9606	taxon:9606	["Gene Symbol-&-1&-RPL27A"]	[""]	FALSE	97	86.2152	97
GMPS	GMPS	G:9606:GMPS	176242	1902	guanine monophosphate synthase	gene	["biological_process-&-1&-GO:0006177-&&-GMP biosynthetic process-%%-GO:0006541-&&-glutamine metabolic process-%%-GO:0009113-&&-purine nucleobase biosynthetic process-%%-GO:0009168-&&-purine ribonucleoside monophosphate biosynthetic process","cellular_component-&-1&-GO:0005829-&&-cytosol","molecular_function-&-1&-GO:0003921-&&-GMP synthase activity-%%-GO:0003922-&&-GMP synthase (glutamine-hydrolyz…	["KEGG-&-1&-hsa00230-&&-Purine metabolism-%%-hsa01100-&&-Metabolic pathways-%%-hsa00983-&&-Drug metabolism - other enzymes"]	GMPS	Homo sapiens (Human)-&&-9606	taxon:9606	["Gene Symbol-&-1&-GMPS"]	[""]	FALSE	12	12
MRPL23	MRPL23	G:9606:MRPL23	178290	1902	mitochondrial ribosomal protein L23	gene	["biological_process-&-1&-GO:0006412-&&-translation-%%-GO:0032543-&&-mitochondrial translation-%%-GO:0070125-&&-mitochondrial translational elongation-%%-GO:0070126-&&-mitochondrial translational termination","cellular_component-&-1&-GO:0001650-&&-fibrillar center-%%-GO:0005739-&&-mitochondrion-%%-GO:0005743-&&-mitochondrial inner membrane-%%-GO:0005762-&&-mitochondrial large ribosomal subunit","…	["KEGG-&-1&-hsa03010-&&-Ribosome"]	MRPL23	Homo sapiens (Human)-&&-9606	taxon:9606	["Gene Symbol-&-1&-MRPL23"]	[""]	FALSE	20	20
HDAC1	HDAC1	G:9606:HDAC1	180336	1902	histone deacetylase 1	gene	["biological_process-&-1&-GO:0000122-&&-negative regulation of transcription from RNA polymerase II promoter-%%-GO:0007596-&&-blood coagulation-%%-GO:0006325-&&-chromatin organization-%%-GO:0006338-&&-chromatin remodeling-%%-GO:0006346-&&-methylation-dependent chromatin silencing-%%-GO:0006351-&&-transcription, DNA-templated-%%-GO:0006476-&&-protein deacetylation-%%-GO:0043066-&&-negative regulat…	["KEGG-&-1&-hsa05220-&&-Chronic myeloid leukemia-%%-hsa05016-&&-Huntington disease-%%-hsa05165-&&-Human papillomavirus infection-%%-hsa05169-&&-Epstein-Barr virus infection-%%-hsa05200-&&-Pathways in cancer-%%-hsa05203-&&-Viral carcinogenesis-%%-hsa04330-&&-Notch signaling pathway-%%-hsa04213-&&-Longevity regulating pathway - multiple species-%%-hsa04110-&&-Cell cycle-%%-hsa05031-&&-Amphetamine a…	HDAC1	Homo sapiens (Human)-&&-9606	taxon:9606	["Gene Symbol-&-1&-HDAC1"]	[""]	FALSE	125	230.379	125
RPL26	RPL26	G:9606:RPL26	178288	1902	ribosomal protein L26	gene	["biological_process-&-1&-GO:0000184-&&-nuclear-transcribed mRNA catabolic process, nonsense-mediated decay-%%-GO:0006364-&&-rRNA processing-%%-GO:0006412-&&-translation-%%-GO:0006413-&&-translational initiation-%%-GO:0006614-&&-SRP-dependent cotranslational protein targeting to membrane-%%-GO:0019083-&&-viral transcription-%%-GO:0042273-&&-ribosomal large subunit biogenesis","cellular_component-…	["KEGG-&-1&-hsa03010-&&-Ribosome"]	RPL26	Homo sapiens (Human)-&&-9606	taxon:9606	["Gene Symbol-&-1&-RPL26"]	[""]	FALSE	68	42.3291	68
HTT	HTT	G:9606:HTT	180337	1902	huntingtin	gene	["biological_process-&-1&-GO:0000132-&&-establishment of mitotic spindle orientation-%%-GO:0006915-&&-apoptotic process-%%-GO:0006890-&&-retrograde vesicle-mediated transport, Golgi to ER-%%-GO:0007030-&&-Golgi organization-%%-GO:0031587-&&-positive regulation of inositol 1,4,5-trisphosphate-sensitive calcium-release channel activity-%%-GO:0042297-&&-vocal learning-%%-GO:0043666-&&-regulation of …	["KEGG-&-1&-hsa05016-&&-Huntington disease"]	HTT	Homo sapiens (Human)-&&-9606	taxon:9606	["Gene Symbol-&-1&-HTT"]	[""]	FALSE	69	84.7956	69
ATP1B3	ATP1B3	G:9606:ATP1B3	182385	1902	ATPase Na+/K+ transporting subunit beta 3	gene	["biological_process-&-1&-GO:0006810-&&-transport-%%-GO:0006883-&&-cellular sodium ion homeostasis-%%-GO:0010107-&&-potassium ion import-%%-GO:0010248-&&-establishment or maintenance of transmembrane electrochemical gradient-%%-GO:0050821-&&-protein stabilization-%%-GO:0030007-&&-cellular potassium ion homeostasis-%%-GO:0032781-&&-positive regulation of ATPase activity-%%-GO:0034220-&&-ion transm…	["KEGG-&-1&-hsa04911-&&-Insulin secretion-%%-hsa04925-&&-Aldosterone synthesis and secretion-%%-hsa04972-&&-Pancreatic secretion-%%-hsa04960-&&-Aldosterone-regulated sodium reabsorption-%%-hsa04964-&&-Proximal tubule bicarbonate reclamation-%%-hsa04970-&&-Salivary secretion-%%-hsa04024-&&-cAMP signaling pathway-%%-hsa04260-&&-Cardiac muscle contraction-%%-hsa04918-&&-Thyroid hormone synthesis-%%-…	ATP1B3	Homo sapiens (Human)-&&-9606	taxon:9606	["Gene Symbol-&-1&-ATP1B3"]	[""]	FALSE	28	28
RPL24	RPL24	G:9606:RPL24	178289	1902	ribosomal protein L24	gene	["biological_process-&-1&-GO:0000027-&&-ribosomal large subunit assembly-%%-GO:0000184-&&-nuclear-transcribed mRNA catabolic process, nonsense-mediated decay-%%-GO:0006364-&&-rRNA processing-%%-GO:0006412-&&-translation-%%-GO:0006413-&&-translational initiation-%%-GO:0006614-&&-SRP-dependent cotranslational protein targeting to membrane-%%-GO:0007093-&&-mitotic cell cycle checkpoint-%%-GO:0010458…	["KEGG-&-1&-hsa03010-&&-Ribosome"]	RPL24	Homo sapiens (Human)-&&-9606	taxon:9606	["Gene Symbol-&-1&-RPL24"]	[""]	FALSE	121	316.186	121
NRP1	NRP1	G:9606:NRP1	176246	1902	neuropilin 1	gene	["biological_process-&-1&-GO:0001525-&&-angiogenesis-%%-GO:0001569-&&-branching involved in blood vessel morphogenesis-%%-GO:0001764-&&-neuron migration-%%-GO:0001938-&&-positive regulation of endothelial cell proliferation-%%-GO:0002040-&&-sprouting angiogenesis-%%-GO:0002042-&&-cell migration involved in sprouting angiogenesis-%%-GO:0007267-&&-cell-cell signaling-%%-GO:0007165-&&-signal transdu…	["KEGG-&-1&-hsa05166-&&-Human T-cell leukemia virus 1 infection-%%-hsa04360-&&-Axon guidance"]	NRP1	Homo sapiens (Human)-&&-9606	taxon:9606	["Gene Symbol-&-1&-NRP1"]	[""]	FALSE	16	16
RPL21	RPL21	G:9606:RPL21	178295	1902	ribosomal protein L21	gene	["biological_process-&-1&-GO:0000184-&&-nuclear-transcribed mRNA catabolic process, nonsense-mediated decay-%%-GO:0006364-&&-rRNA processing-%%-GO:0006412-&&-translation-%%-GO:0006413-&&-translational initiation-%%-GO:0006614-&&-SRP-dependent cotranslational protein targeting to membrane-%%-GO:0019083-&&-viral transcription","cellular_component-&-1&-GO:0022625-&&-cytosolic large ribosomal subunit…	["KEGG-&-1&-hsa03010-&&-Ribosome"]	RPL21	Homo sapiens (Human)-&&-9606	taxon:9606	["Gene Symbol-&-1&-RPL21"]	[""]	FALSE	95	58.0093	95
NRP2	NRP2	G:9606:NRP2	176247	1902	neuropilin 2	gene	["biological_process-&-1&-GO:0001525-&&-angiogenesis-%%-GO:0001938-&&-positive regulation of endothelial cell proliferation-%%-GO:0007155-&&-cell adhesion-%%-GO:0007411-&&-axon guidance-%%-GO:0010595-&&-positive regulation of endothelial cell migration-%%-GO:0021675-&&-nerve development-%%-GO:0038084-&&-vascular endothelial growth factor signaling pathway-%%-GO:0048010-&&-vascular endothelial gro…	[""]	NRP2	Homo sapiens (Human)-&&-9606	taxon:9606	["Gene Symbol-&-1&-NRP2"]	[""]	FALSE	6	6
RNF128	RNF128	G:9606:RNF128	168055	1902	ring finger protein 128, E3 ubiquitin protein ligase	gene	["biological_process-&-1&-GO:0042787-&&-protein ubiquitination involved in ubiquitin-dependent protein catabolic process-%%-GO:0016579-&&-protein deubiquitination-%%-GO:0031647-&&-regulation of protein stability-%%-GO:0042036-&&-negative regulation of cytokine biosynthetic process-%%-GO:0061462-&&-protein localization to lysosome-%%-GO:1904352-&&-positive regulation of protein catabolic process i…	[""]	RNF128	Homo sapiens (Human)-&&-9606	taxon:9606	["Gene Symbol-&-1&-RNF128"]	[""]	FALSE	7	7
RPL23A	RPL23A	G:9606:RPL23A	178292	1902	ribosomal protein L23a	gene	["biological_process-&-1&-GO:0000027-&&-ribosomal large subunit assembly-%%-GO:0000184-&&-nuclear-transcribed mRNA catabolic process, nonsense-mediated decay-%%-GO:0006364-&&-rRNA processing-%%-GO:0006412-&&-translation-%%-GO:0006413-&&-translational initiation-%%-GO:0006614-&&-SRP-dependent cotranslational protein targeting to membrane-%%-GO:0008283-&&-cell proliferation-%%-GO:0019083-&&-viral t…	["KEGG-&-1&-hsa03010-&&-Ribosome"]	RPL23A	Homo sapiens (Human)-&&-9606	taxon:9606	["Gene Symbol-&-1&-RPL23A"]	[""]	FALSE	109	91.4713	109
RPL22	RPL22	G:9606:RPL22	178293	1902	ribosomal protein L22	gene	["biological_process-&-1&-GO:0000184-&&-nuclear-transcribed mRNA catabolic process, nonsense-mediated decay-%%-GO:0002181-&&-cytoplasmic translation-%%-GO:0006364-&&-rRNA processing-%%-GO:0006412-&&-translation-%%-GO:0006413-&&-translational initiation-%%-GO:0006614-&&-SRP-dependent cotranslational protein targeting to membrane-%%-GO:0019083-&&-viral transcription-%%-GO:0046632-&&-alpha-beta T ce…	["KEGG-&-1&-hsa03010-&&-Ribosome"]	RPL22	Homo sapiens (Human)-&&-9606	taxon:9606	["Gene Symbol-&-1&-RPL22"]	[""]	FALSE	94	105.183	94
RPL18	RPL18	G:9606:RPL18	178298	1902	ribosomal protein L18	gene	["biological_process-&-1&-GO:0000184-&&-nuclear-transcribed mRNA catabolic process, nonsense-mediated decay-%%-GO:0006364-&&-rRNA processing-%%-GO:0006412-&&-translation-%%-GO:0006413-&&-translational initiation-%%-GO:0006614-&&-SRP-dependent cotranslational protein targeting to membrane-%%-GO:0019083-&&-viral transcription","cellular_component-&-1&-GO:0022625-&&-cytosolic large ribosomal subunit…	["KEGG-&-1&-hsa03010-&&-Ribosome"]	RPL18	Homo sapiens (Human)-&&-9606	taxon:9606	["Gene Symbol-&-1&-RPL18"]	[""]	FALSE	109	95.8642	109
RPL17	RPL17	G:9606:RPL17	178299	1902	ribosomal protein L17	gene	["biological_process-&-1&-GO:0000184-&&-nuclear-transcribed mRNA catabolic process, nonsense-mediated decay-%%-GO:0006364-&&-rRNA processing-%%-GO:0006412-&&-translation-%%-GO:0006413-&&-translational initiation-%%-GO:0006614-&&-SRP-dependent cotranslational protein targeting to membrane-%%-GO:0019083-&&-viral transcription","cellular_component-&-1&-GO:0022625-&&-cytosolic large ribosomal subunit…	["KEGG-&-1&-hsa03010-&&-Ribosome"]	RPL17	Homo sapiens (Human)-&&-9606	taxon:9606	["Gene Symbol-&-1&-RPL17"]	[""]	FALSE	96	93.5678	96
ATP1A1	ATP1A1	G:9606:ATP1A1	182392	1902	ATPase Na+/K+ transporting subunit alpha 1	gene	["biological_process-&-1&-GO:0002026-&&-regulation of the force of heart contraction-%%-GO:0002028-&&-regulation of sodium ion transport-%%-GO:0006883-&&-cellular sodium ion homeostasis-%%-GO:0008217-&&-regulation of blood pressure-%%-GO:0042493-&&-response to drug-%%-GO:0010107-&&-potassium ion import-%%-GO:0010248-&&-establishment or maintenance of transmembrane electrochemical gradient-%%-GO:0…	["KEGG-&-1&-hsa04911-&&-Insulin secretion-%%-hsa04925-&&-Aldosterone synthesis and secretion-%%-hsa04972-&&-Pancreatic secretion-%%-hsa04960-&&-Aldosterone-regulated sodium reabsorption-%%-hsa04964-&&-Proximal tubule bicarbonate reclamation-%%-hsa04970-&&-Salivary secretion-%%-hsa04024-&&-cAMP signaling pathway-%%-hsa04260-&&-Cardiac muscle contraction-%%-hsa04918-&&-Thyroid hormone synthesis-%%-…	ATP1A1	Homo sapiens (Human)-&&-9606	taxon:9606	["Gene Symbol-&-1&-ATP1A1"]	[""]	FALSE	54	54
RPL19	RPL19	G:9606:RPL19	178296	1902	ribosomal protein L19	gene	["biological_process-&-1&-GO:0000184-&&-nuclear-transcribed mRNA catabolic process, nonsense-mediated decay-%%-GO:0006364-&&-rRNA processing-%%-GO:0006412-&&-translation-%%-GO:0006413-&&-translational initiation-%%-GO:0006614-&&-SRP-dependent cotranslational protein targeting to membrane-%%-GO:0019083-&&-viral transcription-%%-GO:0097421-&&-liver regeneration","cellular_component-&-1&-GO:0022625-…	["KEGG-&-1&-hsa03010-&&-Ribosome"]	RPL19	Homo sapiens (Human)-&&-9606	taxon:9606	["Gene Symbol-&-1&-RPL19"]	[""]	FALSE	111	165.32	111
IQGAP1	IQGAP1	G:9606:IQGAP1	176248	1902	IQ motif containing GTPase activating protein 1	gene	["biological_process-&-1&-GO:0001817-&&-regulation of cytokine production-%%-GO:0007165-&&-signal transduction-%%-GO:0007173-&&-epidermal growth factor receptor signaling pathway-%%-GO:0008543-&&-fibroblast growth factor receptor signaling pathway-%%-GO:0034260-&&-negative regulation of GTPase activity-%%-GO:0043547-&&-positive regulation of GTPase activity-%%-GO:0035305-&&-negative regulation of…	["KEGG-&-1&-hsa04520-&&-Adherens junction-%%-hsa04810-&&-Regulation of actin cytoskeleton-%%-hsa05205-&&-Proteoglycans in cancer"]	IQGAP1	Homo sapiens (Human)-&&-9606	taxon:9606	["Gene Symbol-&-1&-IQGAP1"]	[""]	FALSE	82	89.9577	82
HCK	HCK	G:9606:HCK	180345	1902	HCK proto-oncogene, Src family tyrosine kinase	gene	["biological_process-&-1&-GO:0002522-&&-leukocyte migration involved in immune response-%%-GO:0002758-&&-innate immune response-activating signal transduction-%%-GO:0007155-&&-cell adhesion-%%-GO:0007169-&&-transmembrane receptor protein tyrosine kinase signaling pathway-%%-GO:0006468-&&-protein phosphorylation-%%-GO:0006954-&&-inflammatory response-%%-GO:0007229-&&-integrin-mediated signaling pa…	["KEGG-&-1&-hsa04062-&&-Chemokine signaling pathway-%%-hsa04666-&&-Fc gamma R-mediated phagocytosis-%%-hsa05167-&&-Kaposi sarcoma-associated herpesvirus infection"]	HCK	Homo sapiens (Human)-&&-9606	taxon:9606	["Gene Symbol-&-1&-HCK"]	[""]	FALSE	35	35
RPL12	RPL12	G:9606:RPL12	178302	1902	ribosomal protein L12	gene	["biological_process-&-1&-GO:0000027-&&-ribosomal large subunit assembly-%%-GO:0000184-&&-nuclear-transcribed mRNA catabolic process, nonsense-mediated decay-%%-GO:0006364-&&-rRNA processing-%%-GO:0006412-&&-translation-%%-GO:0006413-&&-translational initiation-%%-GO:0006614-&&-SRP-dependent cotranslational protein targeting to membrane-%%-GO:0019083-&&-viral transcription","cellular_component-&-…	["KEGG-&-1&-hsa03010-&&-Ribosome"]	RPL12	Homo sapiens (Human)-&&-9606	taxon:9606	["Gene Symbol-&-1&-RPL12"]	[""]	FALSE	102	101.513	102
HBZ	HBZ	G:9606:HBZ	180350	1902	hemoglobin subunit zeta	gene	["biological_process-&-1&-GO:0000122-&&-negative regulation of transcription from RNA polymerase II promoter-%%-GO:0015671-&&-oxygen transport-%%-GO:0043249-&&-erythrocyte maturation","cellular_component-&-1&-GO:0005833-&&-hemoglobin complex-%%-GO:0070062-&&-extracellular exosome","molecular_function-&-1&-GO:0005515-&&-protein binding-%%-GO:0005344-&&-oxygen transporter activity-%%-GO:0005506-&&-…	[""]	HBZ	Homo sapiens (Human)-&&-9606	taxon:9606	["Gene Symbol-&-1&-HBZ"]	[""]	FALSE	10	10
RPL11	RPL11	G:9606:RPL11	178303	1902	ribosomal protein L11	gene	["biological_process-&-1&-GO:0000027-&&-ribosomal large subunit assembly-%%-GO:0000184-&&-nuclear-transcribed mRNA catabolic process, nonsense-mediated decay-%%-GO:0006364-&&-rRNA processing-%%-GO:0006412-&&-translation-%%-GO:0006413-&&-translational initiation-%%-GO:0006605-&&-protein targeting-%%-GO:0006614-&&-SRP-dependent cotranslational protein targeting to membrane-%%-GO:0019083-&&-viral tr…	["KEGG-&-1&-hsa03010-&&-Ribosome"]	RPL11	Homo sapiens (Human)-&&-9606	taxon:9606	["Gene Symbol-&-1&-RPL11"]	[""]	FALSE	105	147.336	105
RPL15	RPL15	G:9606:RPL15	178300	1902	ribosomal protein L15	gene	["biological_process-&-1&-GO:0000184-&&-nuclear-transcribed mRNA catabolic process, nonsense-mediated decay-%%-GO:0002181-&&-cytoplasmic translation-%%-GO:0006364-&&-rRNA processing-%%-GO:0006412-&&-translation-%%-GO:0006413-&&-translational initiation-%%-GO:0006614-&&-SRP-dependent cotranslational protein targeting to membrane-%%-GO:0019083-&&-viral transcription-%%-GO:0045471-&&-response to eth…	["KEGG-&-1&-hsa03010-&&-Ribosome"]	RPL15	Homo sapiens (Human)-&&-9606	taxon:9606	["Gene Symbol-&-1&-RPL15"]	[""]	FALSE	102	110.289	102
SLC52A2	SLC52A2	G:9606:SLC52A2	168061	1902	solute carrier family 52 member 2	gene	["biological_process-&-1&-GO:0006771-&&-riboflavin metabolic process-%%-GO:0046718-&&-viral entry into host cell-%%-GO:0032218-&&-riboflavin transport","cellular_component-&-1&-GO:0005886-&&-plasma membrane-%%-GO:0005887-&&-integral component of plasma membrane","molecular_function-&-1&-GO:0005515-&&-protein binding-%%-GO:0001618-&&-virus receptor activity-%%-GO:0032217-&&-riboflavin transporter …	[""]	SLC52A2	Homo sapiens (Human)-&&-9606	taxon:9606	["Gene Symbol-&-1&-SLC52A2"]	[""]	FALSE	1	1
RPL13	RPL13	G:9606:RPL13	178301	1902	ribosomal protein L13	gene	["biological_process-&-1&-GO:0000184-&&-nuclear-transcribed mRNA catabolic process, nonsense-mediated decay-%%-GO:0006364-&&-rRNA processing-%%-GO:0006412-&&-translation-%%-GO:0006413-&&-translational initiation-%%-GO:0006614-&&-SRP-dependent cotranslational protein targeting to membrane-%%-GO:0019083-&&-viral transcription","cellular_component-&-1&-GO:0022625-&&-cytosolic large ribosomal subunit…	["KEGG-&-1&-hsa03010-&&-Ribosome"]	RPL13	Homo sapiens (Human)-&&-9606	taxon:9606	["Gene Symbol-&-1&-RPL13"]	[""]	FALSE	101	228.429	101
RPL8	RPL8	G:9606:RPL8	178306	1902	ribosomal protein L8	gene	["biological_process-&-1&-GO:0000184-&&-nuclear-transcribed mRNA catabolic process, nonsense-mediated decay-%%-GO:0002181-&&-cytoplasmic translation-%%-GO:0006364-&&-rRNA processing-%%-GO:0006412-&&-translation-%%-GO:0006413-&&-translational initiation-%%-GO:0006614-&&-SRP-dependent cotranslational protein targeting to membrane-%%-GO:0019083-&&-viral transcription-%%-GO:1990090-&&-cellular respon…	["KEGG-&-1&-hsa03010-&&-Ribosome"]	RPL8	Homo sapiens (Human)-&&-9606	taxon:9606	["Gene Symbol-&-1&-RPL8"]	[""]	FALSE	94	71.7911	94
HBE1	HBE1	G:9606:HBE1	180354	1902	hemoglobin subunit epsilon 1	gene	["biological_process-&-1&-GO:0007596-&&-blood coagulation-%%-GO:0014070-&&-response to organic cyclic compound-%%-GO:0015671-&&-oxygen transport-%%-GO:0051291-&&-protein heterooligomerization","cellular_component-&-1&-GO:0005829-&&-cytosol-%%-GO:0005833-&&-hemoglobin complex-%%-GO:0072562-&&-blood microparticle","molecular_function-&-1&-GO:0005515-&&-protein binding-%%-GO:0005344-&&-oxygen transp…	[""]	HBE1	Homo sapiens (Human)-&&-9606	taxon:9606	["Gene Symbol-&-1&-HBE1"]	[""]	FALSE	5	5
RPL7A	RPL7A	G:9606:RPL7A	178307	1902	ribosomal protein L7a	gene	["biological_process-&-1&-GO:0000184-&&-nuclear-transcribed mRNA catabolic process, nonsense-mediated decay-%%-GO:0000470-&&-maturation of LSU-rRNA-%%-GO:0006364-&&-rRNA processing-%%-GO:0006412-&&-translation-%%-GO:0006413-&&-translational initiation-%%-GO:0006614-&&-SRP-dependent cotranslational protein targeting to membrane-%%-GO:0019083-&&-viral transcription","cellular_component-&-1&-GO:0022…	["KEGG-&-1&-hsa03010-&&-Ribosome"]	RPL7A	Homo sapiens (Human)-&&-9606	taxon:9606	["Gene Symbol-&-1&-RPL7A"]	[""]	FALSE	111	115.206	111
HBD	HBD	G:9606:HBD	180355	1902	hemoglobin subunit delta	gene	["biological_process-&-1&-GO:0007596-&&-blood coagulation-%%-GO:0015671-&&-oxygen transport","cellular_component-&-1&-GO:0005829-&&-cytosol-%%-GO:0005833-&&-hemoglobin complex-%%-GO:0072562-&&-blood microparticle","molecular_function-&-1&-GO:0005515-&&-protein binding-%%-GO:0005344-&&-oxygen transporter activity-%%-GO:0005506-&&-iron ion binding-%%-GO:0019825-&&-oxygen binding-%%-GO:0020037-&&-he…	[""]	HBD	Homo sapiens (Human)-&&-9606	taxon:9606	["Gene Symbol-&-1&-HBD"]	[""]	FALSE	8	8
HBG2	HBG2	G:9606:HBG2	180352	1902	hemoglobin subunit gamma 2	gene	["biological_process-&-1&-GO:0007596-&&-blood coagulation-%%-GO:0015671-&&-oxygen transport","cellular_component-&-1&-GO:0005829-&&-cytosol-%%-GO:0005833-&&-hemoglobin complex-%%-GO:0072562-&&-blood microparticle","molecular_function-&-1&-GO:0005344-&&-oxygen transporter activity-%%-GO:0005506-&&-iron ion binding-%%-GO:0019825-&&-oxygen binding-%%-GO:0020037-&&-heme binding"]	[""]	HBG2	Homo sapiens (Human)-&&-9606	taxon:9606	["Gene Symbol-&-1&-HBG2"]	[""]	FALSE	8	8
RPL10	RPL10	G:9606:RPL10	178304	1902	ribosomal protein L10	gene	["biological_process-&-1&-GO:0000027-&&-ribosomal large subunit assembly-%%-GO:0000184-&&-nuclear-transcribed mRNA catabolic process, nonsense-mediated decay-%%-GO:0006364-&&-rRNA processing-%%-GO:0006412-&&-translation-%%-GO:0006413-&&-translational initiation-%%-GO:0006614-&&-SRP-dependent cotranslational protein targeting to membrane-%%-GO:0019083-&&-viral transcription","cellular_component-&-…	["KEGG-&-1&-hsa03010-&&-Ribosome"]	RPL10	Homo sapiens (Human)-&&-9606	taxon:9606	["Gene Symbol-&-1&-RPL10"]	[""]	FALSE	123	180.523	123
RPL9	RPL9	G:9606:RPL9	178305	1902	ribosomal protein L9	gene	["biological_process-&-1&-GO:0000184-&&-nuclear-transcribed mRNA catabolic process, nonsense-mediated decay-%%-GO:0002181-&&-cytoplasmic translation-%%-GO:0006364-&&-rRNA processing-%%-GO:0006412-&&-translation-%%-GO:0006413-&&-translational initiation-%%-GO:0006614-&&-SRP-dependent cotranslational protein targeting to membrane-%%-GO:0019083-&&-viral transcription","cellular_component-&-1&-GO:002…	["KEGG-&-1&-hsa03010-&&-Ribosome"]	RPL9	Homo sapiens (Human)-&&-9606	taxon:9606	["Gene Symbol-&-1&-RPL9"]	[""]	FALSE	95	88.5652	95
HBG1	HBG1	G:9606:HBG1	180353	1902	hemoglobin subunit gamma 1	gene	["biological_process-&-1&-GO:0007596-&&-blood coagulation-%%-GO:0015671-&&-oxygen transport","cellular_component-&-1&-GO:0005829-&&-cytosol-%%-GO:0005833-&&-hemoglobin complex","molecular_function-&-1&-GO:0005344-&&-oxygen transporter activity-%%-GO:0005506-&&-iron ion binding-%%-GO:0019825-&&-oxygen binding-%%-GO:0020037-&&-heme binding"]	[""]	HBG1	Homo sapiens (Human)-&&-9606	taxon:9606	["Gene Symbol-&-1&-HBG1"]	[""]	FALSE	4	4
RPL5	RPL5	G:9606:RPL5	178311	1902	ribosomal protein L5	gene	["biological_process-&-1&-GO:0000027-&&-ribosomal large subunit assembly-%%-GO:0000184-&&-nuclear-transcribed mRNA catabolic process, nonsense-mediated decay-%%-GO:0006364-&&-rRNA processing-%%-GO:0006412-&&-translation-%%-GO:0006413-&&-translational initiation-%%-GO:0006614-&&-SRP-dependent cotranslational protein targeting to membrane-%%-GO:0019083-&&-viral transcription-%%-GO:0042273-&&-riboso…	["KEGG-&-1&-hsa03010-&&-Ribosome"]	RPL5	Homo sapiens (Human)-&&-9606	taxon:9606	["Gene Symbol-&-1&-RPL5"]	[""]	FALSE	117	220.286	117
RPL7	RPL7	G:9606:RPL7	178308	1902	ribosomal protein L7	gene	["biological_process-&-1&-GO:0000184-&&-nuclear-transcribed mRNA catabolic process, nonsense-mediated decay-%%-GO:0000463-&&-maturation of LSU-rRNA from tricistronic rRNA transcript (SSU-rRNA, 5.8S rRNA, LSU-rRNA)-%%-GO:0002181-&&-cytoplasmic translation-%%-GO:0006364-&&-rRNA processing-%%-GO:0006412-&&-translation-%%-GO:0006413-&&-translational initiation-%%-GO:0006614-&&-SRP-dependent cotransla…	["KEGG-&-1&-hsa03010-&&-Ribosome"]	RPL7	Homo sapiens (Human)-&&-9606	taxon:9606	["Gene Symbol-&-1&-RPL7"]	[""]	FALSE	116	161.031	116
U2AF1L5	U2AF1L5	G:9606:U2AF1L5	139396	1902	U2 small nuclear RNA auxiliary factor 1 like 5	gene	["biological_process-&-1&-GO:0000398-&&-mRNA splicing, via spliceosome","cellular_component-&-1&-GO:0016607-&&-nuclear speck-%%-GO:0089701-&&-U2AF","molecular_function-&-1&-GO:0000166-&&-nucleotide binding-%%-GO:0003723-&&-RNA binding-%%-GO:0046872-&&-metal ion binding"]	["KEGG-&-1&-hsa05131-&&-Shigellosis-%%-hsa03040-&&-Spliceosome"]	U2AF1L5	Homo sapiens (Human)-&&-9606	taxon:9606	["Gene Symbol-&-1&-U2AF1L5"]	[""]	FALSE	36	36
RPL6	RPL6	G:9606:RPL6	178309	1902	ribosomal protein L6	gene	["biological_process-&-1&-GO:0000027-&&-ribosomal large subunit assembly-%%-GO:0000184-&&-nuclear-transcribed mRNA catabolic process, nonsense-mediated decay-%%-GO:0002181-&&-cytoplasmic translation-%%-GO:0006355-&&-regulation of transcription, DNA-templated-%%-GO:0006364-&&-rRNA processing-%%-GO:0006412-&&-translation-%%-GO:0006413-&&-translational initiation-%%-GO:0006614-&&-SRP-dependent cotra…	["KEGG-&-1&-hsa03010-&&-Ribosome"]	RPL6	Homo sapiens (Human)-&&-9606	taxon:9606	["Gene Symbol-&-1&-RPL6"]	[""]	FALSE	119	155.877	119
RPL3	RPL3	G:9606:RPL3	178314	1902	ribosomal protein L3	gene	["biological_process-&-1&-GO:0000184-&&-nuclear-transcribed mRNA catabolic process, nonsense-mediated decay-%%-GO:0006364-&&-rRNA processing-%%-GO:0006412-&&-translation-%%-GO:0006413-&&-translational initiation-%%-GO:0006614-&&-SRP-dependent cotranslational protein targeting to membrane-%%-GO:0019083-&&-viral transcription-%%-GO:0071353-&&-cellular response to interleukin-4","cellular_component-…	["KEGG-&-1&-hsa03010-&&-Ribosome"]	RPL3	Homo sapiens (Human)-&&-9606	taxon:9606	["Gene Symbol-&-1&-RPL3"]	[""]	FALSE	96	119.828	96
RPL4	RPL4	G:9606:RPL4	178312	1902	ribosomal protein L4	gene	["biological_process-&-1&-GO:0000184-&&-nuclear-transcribed mRNA catabolic process, nonsense-mediated decay-%%-GO:0006364-&&-rRNA processing-%%-GO:0006412-&&-translation-%%-GO:0006413-&&-translational initiation-%%-GO:0006614-&&-SRP-dependent cotranslational protein targeting to membrane-%%-GO:0019083-&&-viral transcription","cellular_component-&-1&-GO:0022625-&&-cytosolic large ribosomal subunit…	["KEGG-&-1&-hsa03010-&&-Ribosome"]	RPL4	Homo sapiens (Human)-&&-9606	taxon:9606	["Gene Symbol-&-1&-RPL4"]	[""]	FALSE	111	192.795	111
HBA2	HBA2	G:9606:HBA2	180360	1902	hemoglobin subunit alpha 2	gene	["biological_process-&-1&-GO:0006898-&&-receptor-mediated endocytosis-%%-GO:0010942-&&-positive regulation of cell death-%%-GO:0015671-&&-oxygen transport-%%-GO:0015701-&&-bicarbonate transport-%%-GO:0042542-&&-response to hydrogen peroxide-%%-GO:0042744-&&-hydrogen peroxide catabolic process-%%-GO:0051291-&&-protein heterooligomerization-%%-GO:0098869-&&-cellular oxidant detoxification","cellula…	["KEGG-&-1&-hsa05144-&&-Malaria-%%-hsa05143-&&-African trypanosomiasis"]	HBA2	Homo sapiens (Human)-&&-9606	taxon:9606	["Gene Symbol-&-1&-HBA2"]	[""]	FALSE	19	19
HBA1	HBA1	G:9606:HBA1	180361	1902	hemoglobin subunit alpha 1	gene	["biological_process-&-1&-GO:0006898-&&-receptor-mediated endocytosis-%%-GO:0010942-&&-positive regulation of cell death-%%-GO:0015671-&&-oxygen transport-%%-GO:0015701-&&-bicarbonate transport-%%-GO:0042542-&&-response to hydrogen peroxide-%%-GO:0042744-&&-hydrogen peroxide catabolic process-%%-GO:0051291-&&-protein heterooligomerization-%%-GO:0098869-&&-cellular oxidant detoxification","cellula…	["KEGG-&-1&-hsa05144-&&-Malaria-%%-hsa05143-&&-African trypanosomiasis"]	HBA1	Homo sapiens (Human)-&&-9606	taxon:9606	["Gene Symbol-&-1&-HBA1"]	[""]	FALSE	19	19
RPA2	RPA2	G:9606:RPA2	178318	1902	replication protein A2	gene	["biological_process-&-1&-GO:0006260-&&-DNA replication-%%-GO:0000082-&&-G1/S transition of mitotic cell cycle-%%-GO:0000722-&&-telomere maintenance via recombination-%%-GO:0000723-&&-telomere maintenance-%%-GO:0000724-&&-double-strand break repair via homologous recombination-%%-GO:0006283-&&-transcription-coupled nucleotide-excision repair-%%-GO:0006284-&&-base-excision repair-%%-GO:0006289-&&-…	["KEGG-&-1&-hsa03430-&&-Mismatch repair-%%-hsa03420-&&-Nucleotide excision repair-%%-hsa03460-&&-Fanconi anemia pathway-%%-hsa03440-&&-Homologous recombination-%%-hsa03030-&&-DNA replication"]	RPA2	Homo sapiens (Human)-&&-9606	taxon:9606	["Gene Symbol-&-1&-RPA2"]	[""]	FALSE	153	266.472	153
RPA1	RPA1	G:9606:RPA1	178319	1902	replication protein A1	gene	["biological_process-&-1&-GO:0006260-&&-DNA replication-%%-GO:0000082-&&-G1/S transition of mitotic cell cycle-%%-GO:0000722-&&-telomere maintenance via recombination-%%-GO:0000723-&&-telomere maintenance-%%-GO:0000724-&&-double-strand break repair via homologous recombination-%%-GO:0006261-&&-DNA-dependent DNA replication-%%-GO:0006281-&&-DNA repair-%%-GO:0006283-&&-transcription-coupled nucleot…	["KEGG-&-1&-hsa03430-&&-Mismatch repair-%%-hsa03420-&&-Nucleotide excision repair-%%-hsa03460-&&-Fanconi anemia pathway-%%-hsa03440-&&-Homologous recombination-%%-hsa03030-&&-DNA replication"]	RPA1	Homo sapiens (Human)-&&-9606	taxon:9606	["Gene Symbol-&-1&-RPA1"]	[""]	FALSE	154	270.907	154
TRIM24	TRIM24	G:9606:TRIM24	176268	1902	tripartite motif containing 24	gene	["biological_process-&-1&-GO:0006366-&&-transcription from RNA polymerase II promoter-%%-GO:0016567-&&-protein ubiquitination-%%-GO:0008285-&&-negative regulation of cell proliferation-%%-GO:0042981-&&-regulation of apoptotic process-%%-GO:0045893-&&-positive regulation of transcription, DNA-templated-%%-GO:0045892-&&-negative regulation of transcription, DNA-templated-%%-GO:0018108-&&-peptidyl-t…	[""]	TRIM24	Homo sapiens (Human)-&&-9606	taxon:9606	["Gene Symbol-&-1&-TRIM24"]	[""]	FALSE	43	43
PHB2	PHB2	G:9606:PHB2	174221	1902	prohibitin 2	gene	["biological_process-&-1&-GO:0000060-&&-protein import into nucleus, translocation-%%-GO:0006351-&&-transcription, DNA-templated-%%-GO:0007005-&&-mitochondrion organization-%%-GO:0007062-&&-sister chromatid cohesion-%%-GO:0043066-&&-negative regulation of apoptotic process-%%-GO:0045892-&&-negative regulation of transcription, DNA-templated-%%-GO:0050821-&&-protein stabilization-%%-GO:0030449-&&-…	[""]	PHB2	Homo sapiens (Human)-&&-9606	taxon:9606	["Gene Symbol-&-1&-PHB2"]	[""]	FALSE	59	59
RPA3	RPA3	G:9606:RPA3	178317	1902	replication protein A3	gene	["biological_process-&-1&-GO:0006260-&&-DNA replication-%%-GO:0000082-&&-G1/S transition of mitotic cell cycle-%%-GO:0000722-&&-telomere maintenance via recombination-%%-GO:0000724-&&-double-strand break repair via homologous recombination-%%-GO:0006283-&&-transcription-coupled nucleotide-excision repair-%%-GO:0006284-&&-base-excision repair-%%-GO:0006289-&&-nucleotide-excision repair-%%-GO:00062…	["KEGG-&-1&-hsa03430-&&-Mismatch repair-%%-hsa03420-&&-Nucleotide excision repair-%%-hsa03460-&&-Fanconi anemia pathway-%%-hsa03440-&&-Homologous recombination-%%-hsa03030-&&-DNA replication"]	RPA3	Homo sapiens (Human)-&&-9606	taxon:9606	["Gene Symbol-&-1&-RPA3"]	[""]	FALSE	134	191.875	134
ASNS	ASNS	G:9606:ASNS	182419	1902	asparagine synthetase (glutamine-hydrolyzing)	gene	["biological_process-&-1&-GO:0001889-&&-liver development-%%-GO:0006529-&&-asparagine biosynthetic process-%%-GO:0006541-&&-glutamine metabolic process-%%-GO:0009612-&&-response to mechanical stimulus-%%-GO:0043066-&&-negative regulation of apoptotic process-%%-GO:0008652-&&-cellular amino acid biosynthetic process-%%-GO:0009636-&&-response to toxic substance-%%-GO:0009416-&&-response to light st…	["KEGG-&-1&-hsa01230-&&-Biosynthesis of amino acids-%%-hsa01100-&&-Metabolic pathways-%%-hsa00250-&&-Alanine, aspartate and glutamate metabolism"]	ASNS	Homo sapiens (Human)-&&-9606	taxon:9606	["Gene Symbol-&-1&-ASNS"]	[""]	FALSE	24	24
HADHB	HADHB	G:9606:HADHB	180368	1902	hydroxyacyl-CoA dehydrogenase/3-ketoacyl-CoA thiolase/enoyl-CoA hydratase (trifunctional protein), beta subunit	gene	["biological_process-&-1&-GO:0006635-&&-fatty acid beta-oxidation-%%-GO:0035965-&&-cardiolipin acyl-chain remodeling","cellular_component-&-1&-GO:0005739-&&-mitochondrion-%%-GO:0005783-&&-endoplasmic reticulum-%%-GO:0005740-&&-mitochondrial envelope-%%-GO:0005741-&&-mitochondrial outer membrane-%%-GO:0005743-&&-mitochondrial inner membrane-%%-GO:0042645-&&-mitochondrial nucleoid-%%-GO:0070062-&&-…	["KEGG-&-1&-hsa00280-&&-Valine, leucine and isoleucine degradation-%%-hsa00062-&&-Fatty acid elongation-%%-hsa00071-&&-Fatty acid degradation-%%-hsa01212-&&-Fatty acid metabolism-%%-hsa01100-&&-Metabolic pathways"]	HADHB	Homo sapiens (Human)-&&-9606	taxon:9606	["Gene Symbol-&-1&-HADHB"]	[""]	FALSE	21	21
ATAD3A	ATAD3A	G:9606:ATAD3A	170128	1902	ATPase family, AAA domain containing 3A	gene	["biological_process-&-1&-GO:0016049-&&-cell growth-%%-GO:0043066-&&-negative regulation of apoptotic process","cellular_component-&-1&-GO:0016021-&&-integral component of membrane-%%-GO:0005739-&&-mitochondrion-%%-GO:0005743-&&-mitochondrial inner membrane-%%-GO:0042645-&&-mitochondrial nucleoid","molecular_function-&-1&-GO:0005524-&&-ATP binding"]	[""]	ATAD3A	Homo sapiens (Human)-&&-9606	taxon:9606	["Gene Symbol-&-1&-ATAD3A"]	[""]	FALSE	18	18
HIST1H1A	HIST1H1A	G:9606:HIST1H1A	180374	1902	histone cluster 1 H1 family member a	gene	["biological_process-&-1&-GO:0006334-&&-nucleosome assembly-%%-GO:0007283-&&-spermatogenesis","cellular_component-&-1&-GO:0000786-&&-nucleosome-%%-GO:0000790-&&-nuclear chromatin-%%-GO:0005719-&&-nuclear euchromatin","molecular_function-&-1&-GO:0005515-&&-protein binding-%%-GO:0031490-&&-chromatin DNA binding"]	[""]	HIST1H1A	Homo sapiens (Human)-&&-9606	taxon:9606	["Gene Symbol-&-1&-HIST1H1A"]	[""]	FALSE	37	37
ASL	ASL	G:9606:ASL	182423	1902	argininosuccinate lyase	gene	["biological_process-&-1&-GO:0000050-&&-urea cycle-%%-GO:0042450-&&-arginine biosynthetic process via ornithine","cellular_component-&-1&-GO:0005829-&&-cytosol-%%-GO:0005737-&&-cytoplasm-%%-GO:0070062-&&-extracellular exosome","molecular_function-&-1&-GO:0005515-&&-protein binding-%%-GO:0004056-&&-argininosuccinate lyase activity-%%-GO:0042802-&&-identical protein binding"]	["KEGG-&-1&-hsa00220-&&-Arginine biosynthesis-%%-hsa01230-&&-Biosynthesis of amino acids-%%-hsa01100-&&-Metabolic pathways-%%-hsa00250-&&-Alanine, aspartate and glutamate metabolism"]	ASL	Homo sapiens (Human)-&&-9606	taxon:9606	["Gene Symbol-&-1&-ASL"]	[""]	FALSE	5	5
H3F3B	H3F3B	G:9606:H3F3B	180375	1902	H3 histone family member 3B	gene	["biological_process-&-1&-GO:0000183-&&-chromatin silencing at rDNA-%%-GO:0001649-&&-osteoblast differentiation-%%-GO:0006334-&&-nucleosome assembly-%%-GO:0007596-&&-blood coagulation-%%-GO:0006336-&&-DNA replication-independent nucleosome assembly-%%-GO:0006997-&&-nucleus organization-%%-GO:0007286-&&-spermatid development-%%-GO:0007338-&&-single fertilization-%%-GO:0007420-&&-brain development-…	["KEGG-&-1&-hsa05322-&&-Systemic lupus erythematosus-%%-hsa05034-&&-Alcoholism-%%-hsa05202-&&-Transcriptional misregulation in cancer"]	H3F3B	Homo sapiens (Human)-&&-9606	taxon:9606	["Gene Symbol-&-1&-H3F3B"]	[""]	FALSE	53	53
HIST1H2BD	HIST1H2BD	G:9606:HIST1H2BD	180378	1902	histone cluster 1 H2B family member d	gene	["biological_process-&-1&-GO:0006334-&&-nucleosome assembly-%%-GO:0016567-&&-protein ubiquitination","cellular_component-&-1&-GO:0000786-&&-nucleosome-%%-GO:0005829-&&-cytosol-%%-GO:0005634-&&-nucleus-%%-GO:0005654-&&-nucleoplasm-%%-GO:0070062-&&-extracellular exosome","molecular_function-&-1&-GO:0003674-&&-molecular_function-%%-GO:0003677-&&-DNA binding-%%-GO:0046982-&&-protein heterodimerizatio…	["KEGG-&-1&-hsa05322-&&-Systemic lupus erythematosus-%%-hsa05034-&&-Alcoholism-%%-hsa05203-&&-Viral carcinogenesis"]	HIST1H2BD	Homo sapiens (Human)-&&-9606	taxon:9606	["Gene Symbol-&-1&-HIST1H2BD"]	[""]	FALSE	24	24
H3F3A	H3F3A	G:9606:H3F3A	180376	1902	H3 histone family member 3A	gene	["biological_process-&-1&-GO:0000183-&&-chromatin silencing at rDNA-%%-GO:0001649-&&-osteoblast differentiation-%%-GO:0006334-&&-nucleosome assembly-%%-GO:0007596-&&-blood coagulation-%%-GO:0006336-&&-DNA replication-independent nucleosome assembly-%%-GO:0006997-&&-nucleus organization-%%-GO:0007286-&&-spermatid development-%%-GO:0007338-&&-single fertilization-%%-GO:0007420-&&-brain development-…	["KEGG-&-1&-hsa05322-&&-Systemic lupus erythematosus-%%-hsa05034-&&-Alcoholism-%%-hsa05202-&&-Transcriptional misregulation in cancer"]	H3F3A	Homo sapiens (Human)-&&-9606	taxon:9606	["Gene Symbol-&-1&-H3F3A"]	[""]	FALSE	53	53
HIST1H2BB	HIST1H2BB	G:9606:HIST1H2BB	180377	1902	histone cluster 1 H2B family member b	gene	["biological_process-&-1&-GO:0006334-&&-nucleosome assembly-%%-GO:0016567-&&-protein ubiquitination","cellular_component-&-1&-GO:0000784-&&-nuclear chromosome, telomeric region-%%-GO:0000786-&&-nucleosome-%%-GO:0005829-&&-cytosol-%%-GO:0005634-&&-nucleus-%%-GO:0005654-&&-nucleoplasm","molecular_function-&-1&-GO:0005515-&&-protein binding-%%-GO:0003677-&&-DNA binding-%%-GO:0046982-&&-protein heter…	["KEGG-&-1&-hsa05322-&&-Systemic lupus erythematosus-%%-hsa05034-&&-Alcoholism-%%-hsa05203-&&-Viral carcinogenesis"]	HIST1H2BB	Homo sapiens (Human)-&&-9606	taxon:9606	["Gene Symbol-&-1&-HIST1H2BB"]	[""]	FALSE	37	37
RGS11	RGS11	G:9606:RGS11	176286	1902	regulator of G-protein signaling 11	gene	["biological_process-&-1&-GO:0035556-&&-intracellular signal transduction-%%-GO:0007186-&&-G-protein coupled receptor signaling pathway-%%-GO:0008277-&&-regulation of G-protein coupled receptor protein signaling pathway-%%-GO:0009968-&&-negative regulation of signal transduction-%%-GO:0043547-&&-positive regulation of GTPase activity","cellular_component-&-1&-GO:0005886-&&-plasma membrane-%%-GO:0…	[""]	RGS11	Homo sapiens (Human)-&&-9606	taxon:9606	["Gene Symbol-&-1&-RGS11"]	[""]	FALSE	4	4
LYPLA2	LYPLA2	G:9606:LYPLA2	174236	1902	lysophospholipase II	gene	["biological_process-&-1&-GO:0002084-&&-protein depalmitoylation-%%-GO:0006631-&&-fatty acid metabolic process-%%-GO:0007411-&&-axon guidance","cellular_component-&-1&-GO:0005829-&&-cytosol-%%-GO:0005737-&&-cytoplasm-%%-GO:0070062-&&-extracellular exosome","molecular_function-&-1&-GO:0008474-&&-palmitoyl-(protein) hydrolase activity-%%-GO:0045296-&&-cadherin binding-%%-GO:0052689-&&-carboxylic es…	["KEGG-&-1&-hsa00564-&&-Glycerophospholipid metabolism"]	LYPLA2	Homo sapiens (Human)-&&-9606	taxon:9606	["Gene Symbol-&-1&-LYPLA2"]	[""]	FALSE	7	7
RGS9	RGS9	G:9606:RGS9	176285	1902	regulator of G-protein signaling 9	gene	["biological_process-&-1&-GO:0006457-&&-protein folding-%%-GO:0035556-&&-intracellular signal transduction-%%-GO:0007212-&&-dopamine receptor signaling pathway-%%-GO:0007399-&&-nervous system development-%%-GO:0007601-&&-visual perception-%%-GO:0008277-&&-regulation of G-protein coupled receptor protein signaling pathway-%%-GO:0009968-&&-negative regulation of signal transduction-%%-GO:0043547-&&…	["KEGG-&-1&-hsa04744-&&-Phototransduction-%%-hsa05030-&&-Cocaine addiction"]	RGS9	Homo sapiens (Human)-&&-9606	taxon:9606	["Gene Symbol-&-1&-RGS9"]	[""]	FALSE	2	2
HIST1H2AD	HIST1H2AD	G:9606:HIST1H2AD	180381	1902	histone cluster 1 H2A family member d	gene	["biological_process-&-1&-GO:0006342-&&-chromatin silencing-%%-GO:0008150-&&-biological_process","cellular_component-&-1&-GO:0000786-&&-nucleosome-%%-GO:0000790-&&-nuclear chromatin-%%-GO:0005634-&&-nucleus-%%-GO:0070062-&&-extracellular exosome","molecular_function-&-1&-GO:0003674-&&-molecular_function-%%-GO:0003677-&&-DNA binding-%%-GO:0046982-&&-protein heterodimerization activity"]	["KEGG-&-1&-hsa05322-&&-Systemic lupus erythematosus-%%-hsa05034-&&-Alcoholism-%%-hsa04217-&&-Necroptosis"]	HIST1H2AD	Homo sapiens (Human)-&&-9606	taxon:9606	["Gene Symbol-&-1&-HIST1H2AD"]	[""]	FALSE	17	17
HIST1H1D	HIST1H1D	G:9606:HIST1H1D	180386	1902	histone cluster 1 H1 family member d	gene	["biological_process-&-1&-GO:0000122-&&-negative regulation of transcription from RNA polymerase II promoter-%%-GO:0006334-&&-nucleosome assembly-%%-GO:0016584-&&-nucleosome positioning-%%-GO:0080182-&&-histone H3-K4 trimethylation-%%-GO:0098532-&&-histone H3-K27 trimethylation","cellular_component-&-1&-GO:0000786-&&-nucleosome-%%-GO:0000790-&&-nuclear chromatin-%%-GO:0005719-&&-nuclear euchromat…	[""]	HIST1H1D	Homo sapiens (Human)-&&-9606	taxon:9606	["Gene Symbol-&-1&-HIST1H1D"]	[""]	FALSE	15	15
HIST1H1C	HIST1H1C	G:9606:HIST1H1C	180387	1902	histone cluster 1 H1 family member c	gene	["biological_process-&-1&-GO:0000122-&&-negative regulation of transcription from RNA polymerase II promoter-%%-GO:0006334-&&-nucleosome assembly-%%-GO:0016584-&&-nucleosome positioning-%%-GO:0080182-&&-histone H3-K4 trimethylation-%%-GO:0098532-&&-histone H3-K27 trimethylation","cellular_component-&-1&-GO:0000786-&&-nucleosome-%%-GO:0005634-&&-nucleus-%%-GO:0005719-&&-nuclear euchromatin-%%-GO:0…	[""]	HIST1H1C	Homo sapiens (Human)-&&-9606	taxon:9606	["Gene Symbol-&-1&-HIST1H1C"]	[""]	FALSE	38	38
HIST1H1B	HIST1H1B	G:9606:HIST1H1B	180384	1902	histone cluster 1 H1 family member b	gene	["biological_process-&-1&-GO:0000122-&&-negative regulation of transcription from RNA polymerase II promoter-%%-GO:0006334-&&-nucleosome assembly-%%-GO:0006325-&&-chromatin organization-%%-GO:0050821-&&-protein stabilization-%%-GO:0030307-&&-positive regulation of cell growth-%%-GO:0051574-&&-positive regulation of histone H3-K9 methylation-%%-GO:0071169-&&-establishment of protein localization t…	[""]	HIST1H1B	Homo sapiens (Human)-&&-9606	taxon:9606	["Gene Symbol-&-1&-HIST1H1B"]	[""]	FALSE	31	31
HIST1H1E	HIST1H1E	G:9606:HIST1H1E	180385	1902	histone cluster 1 H1 family member e	gene	["biological_process-&-1&-GO:0000122-&&-negative regulation of transcription from RNA polymerase II promoter-%%-GO:0006334-&&-nucleosome assembly-%%-GO:0016584-&&-nucleosome positioning-%%-GO:0080182-&&-histone H3-K4 trimethylation-%%-GO:0098532-&&-histone H3-K27 trimethylation","cellular_component-&-1&-GO:0000786-&&-nucleosome-%%-GO:0005634-&&-nucleus-%%-GO:0005720-&&-nuclear heterochromatin-%%-…	[""]	HIST1H1E	Homo sapiens (Human)-&&-9606	taxon:9606	["Gene Symbol-&-1&-HIST1H1E"]	[""]	FALSE	16	16
TMEM259	TMEM259	G:9606:TMEM259	166055	1902	transmembrane protein 259	gene	["biological_process-&-1&-GO:0034976-&&-response to endoplasmic reticulum stress-%%-GO:1901215-&&-negative regulation of neuron death-%%-GO:1904294-&&-positive regulation of ERAD pathway","cellular_component-&-1&-GO:0016021-&&-integral component of membrane-%%-GO:0005789-&&-endoplasmic reticulum membrane"]	[""]	TMEM259	Homo sapiens (Human)-&&-9606	taxon:9606	["Gene Symbol-&-1&-TMEM259"]	[""]	FALSE	5	5
NAPA	NAPA	G:9606:NAPA	176295	1902	NSF attachment protein alpha	gene	["biological_process-&-1&-GO:0006886-&&-intracellular protein transport-%%-GO:0006888-&&-ER to Golgi vesicle-mediated transport-%%-GO:0006890-&&-retrograde vesicle-mediated transport, Golgi to ER-%%-GO:0006891-&&-intra-Golgi vesicle-mediated transport-%%-GO:0007420-&&-brain development-%%-GO:0061025-&&-membrane fusion-%%-GO:0010807-&&-regulation of synaptic vesicle priming-%%-GO:0030182-&&-neuron…	["KEGG-&-1&-hsa04721-&&-Synaptic vesicle cycle"]	NAPA	Homo sapiens (Human)-&&-9606	taxon:9606	["Gene Symbol-&-1&-NAPA"]	[""]	FALSE	15	15
HIST1H2AI	HIST1H2AI	G:9606:HIST1H2AI	176298	1902	histone cluster 1 H2A family member i	gene	["biological_process-&-1&-GO:0006342-&&-chromatin silencing-%%-GO:0008150-&&-biological_process","cellular_component-&-1&-GO:0000786-&&-nucleosome-%%-GO:0000790-&&-nuclear chromatin-%%-GO:0005634-&&-nucleus-%%-GO:0070062-&&-extracellular exosome","molecular_function-&-1&-GO:0005515-&&-protein binding-%%-GO:0003677-&&-DNA binding-%%-GO:0019899-&&-enzyme binding-%%-GO:0046982-&&-protein heterodimer…	["KEGG-&-1&-hsa05322-&&-Systemic lupus erythematosus-%%-hsa04217-&&-Necroptosis-%%-hsa05034-&&-Alcoholism"]	HIST1H2AI	Homo sapiens (Human)-&&-9606	taxon:9606	["Gene Symbol-&-1&-HIST1H2AI"]	[""]	FALSE	24	24
HIST1H2AK	HIST1H2AK	G:9606:HIST1H2AK	176297	1902	histone cluster 1 H2A family member k	gene	["biological_process-&-1&-GO:0006342-&&-chromatin silencing-%%-GO:0008150-&&-biological_process","cellular_component-&-1&-GO:0000786-&&-nucleosome-%%-GO:0000790-&&-nuclear chromatin-%%-GO:0005634-&&-nucleus-%%-GO:0070062-&&-extracellular exosome","molecular_function-&-1&-GO:0005515-&&-protein binding-%%-GO:0003674-&&-molecular_function-%%-GO:0003677-&&-DNA binding-%%-GO:0019899-&&-enzyme binding-…	["KEGG-&-1&-hsa05322-&&-Systemic lupus erythematosus-%%-hsa04217-&&-Necroptosis-%%-hsa05034-&&-Alcoholism"]	HIST1H2AK	Homo sapiens (Human)-&&-9606	taxon:9606	["Gene Symbol-&-1&-HIST1H2AK"]	[""]	FALSE	24	24
ARRB1	ARRB1	G:9606:ARRB1	182446	1902	arrestin beta 1	gene	["biological_process-&-1&-GO:0000187-&&-activation of MAPK activity-%%-GO:0001934-&&-positive regulation of protein phosphorylation-%%-GO:0002031-&&-G-protein coupled receptor internalization-%%-GO:0002092-&&-positive regulation of receptor internalization-%%-GO:0006366-&&-transcription from RNA polymerase II promoter-%%-GO:0006915-&&-apoptotic process-%%-GO:0016567-&&-protein ubiquitination-%%-G…	["KEGG-&-1&-hsa04062-&&-Chemokine signaling pathway-%%-hsa04740-&&-Olfactory transduction-%%-hsa04144-&&-Endocytosis-%%-hsa05032-&&-Morphine addiction-%%-hsa04928-&&-Parathyroid hormone synthesis, secretion and action-%%-hsa04926-&&-Relaxin signaling pathway-%%-hsa04340-&&-Hedgehog signaling pathway-%%-hsa04010-&&-MAPK signaling pathway"]	ARRB1	Homo sapiens (Human)-&&-9606	taxon:9606	["Gene Symbol-&-1&-ARRB1"]	[""]	FALSE	129	255.996	129
ARR3	ARR3	G:9606:ARR3	182447	1902	arrestin 3	gene	["biological_process-&-1&-GO:0001932-&&-regulation of protein phosphorylation-%%-GO:0007165-&&-signal transduction-%%-GO:0006897-&&-endocytosis-%%-GO:0007601-&&-visual perception","cellular_component-&-1&-GO:0001750-&&-photoreceptor outer segment-%%-GO:0001917-&&-photoreceptor inner segment-%%-GO:0005737-&&-cytoplasm-%%-GO:0045202-&&-synapse","molecular_function-&-1&-GO:0005515-&&-protein binding…	[""]	ARR3	Homo sapiens (Human)-&&-9606	taxon:9606	["Gene Symbol-&-1&-ARR3"]	[""]	FALSE	7	7
ARRB2	ARRB2	G:9606:ARRB2	182445	1902	arrestin beta 2	gene	["biological_process-&-1&-GO:0001933-&&-negative regulation of protein phosphorylation-%%-GO:0002031-&&-G-protein coupled receptor internalization-%%-GO:0002032-&&-desensitization of G-protein coupled receptor protein signaling pathway by arrestin-%%-GO:0002092-&&-positive regulation of receptor internalization-%%-GO:0006366-&&-transcription from RNA polymerase II promoter-%%-GO:0016567-&&-protei…	["KEGG-&-1&-hsa04062-&&-Chemokine signaling pathway-%%-hsa04740-&&-Olfactory transduction-%%-hsa04144-&&-Endocytosis-%%-hsa05032-&&-Morphine addiction-%%-hsa04928-&&-Parathyroid hormone synthesis, secretion and action-%%-hsa04926-&&-Relaxin signaling pathway-%%-hsa04340-&&-Hedgehog signaling pathway-%%-hsa04010-&&-MAPK signaling pathway-%%-hsa04728-&&-Dopaminergic synapse"]	ARRB2	Homo sapiens (Human)-&&-9606	taxon:9606	["Gene Symbol-&-1&-ARRB2"]	[""]	FALSE	158	534.62	158
CDC45	CDC45	G:9606:CDC45	176308	1902	cell division cycle 45	gene	["biological_process-&-1&-GO:0006260-&&-DNA replication-%%-GO:0000076-&&-DNA replication checkpoint-%%-GO:0000082-&&-G1/S transition of mitotic cell cycle-%%-GO:0000083-&&-regulation of transcription involved in G1/S transition of mitotic cell cycle-%%-GO:0000727-&&-double-strand break repair via break-induced replication-%%-GO:0006267-&&-pre-replicative complex assembly involved in nuclear cell …	["KEGG-&-1&-hsa04110-&&-Cell cycle"]	CDC45	Homo sapiens (Human)-&&-9606	taxon:9606	["Gene Symbol-&-1&-CDC45"]	[""]	FALSE	23	23
ARHGAP5	ARHGAP5	G:9606:ARHGAP5	182459	1902	Rho GTPase activating protein 5	gene	["biological_process-&-1&-GO:0007155-&&-cell adhesion-%%-GO:0007266-&&-Rho protein signal transduction-%%-GO:0030879-&&-mammary gland development-%%-GO:0043547-&&-positive regulation of GTPase activity-%%-GO:0051056-&&-regulation of small GTPase mediated signal transduction","cellular_component-&-1&-GO:0016020-&&-membrane-%%-GO:0005829-&&-cytosol-%%-GO:0005783-&&-endoplasmic reticulum-%%-GO:00057…	["KEGG-&-1&-hsa04510-&&-Focal adhesion-%%-hsa04670-&&-Leukocyte transendothelial migration"]	ARHGAP5	Homo sapiens (Human)-&&-9606	taxon:9606	["Gene Symbol-&-1&-ARHGAP5"]	[""]	FALSE	7	7
CCDC155	CCDC155	G:9606:CCDC155	164027	1902	coiled-coil domain containing 155	gene	["biological_process-&-1&-GO:0000724-&&-double-strand break repair via homologous recombination-%%-GO:0007015-&&-actin filament organization-%%-GO:0007129-&&-synapsis-%%-GO:0007283-&&-spermatogenesis-%%-GO:0034397-&&-telomere localization-%%-GO:0048477-&&-oogenesis-%%-GO:0051225-&&-spindle assembly-%%-GO:0051653-&&-spindle localization-%%-GO:0090220-&&-chromosome localization to nuclear envelope …	[""]	CCDC155	Homo sapiens (Human)-&&-9606	taxon:9606	["Gene Symbol-&-1&-CCDC155"]	[""]	FALSE	6	6
ARHGDIA	ARHGDIA	G:9606:ARHGDIA	182457	1902	Rho GDP dissociation inhibitor alpha	gene	["biological_process-&-1&-GO:0006928-&&-movement of cell or subcellular component-%%-GO:0007162-&&-negative regulation of cell adhesion-%%-GO:0043066-&&-negative regulation of apoptotic process-%%-GO:0043547-&&-positive regulation of GTPase activity-%%-GO:0035023-&&-regulation of Rho protein signal transduction-%%-GO:0050771-&&-negative regulation of axonogenesis-%%-GO:0050772-&&-positive regulat…	["KEGG-&-1&-hsa04962-&&-Vasopressin-regulated water reabsorption-%%-hsa04722-&&-Neurotrophin signaling pathway"]	ARHGDIA	Homo sapiens (Human)-&&-9606	taxon:9606	["Gene Symbol-&-1&-ARHGDIA"]	[""]	FALSE	32	32
AXIN1	AXIN1	G:9606:AXIN1	176313	1902	axin 1	gene	["biological_process-&-1&-GO:0001743-&&-optic placode formation-%%-GO:0001934-&&-positive regulation of protein phosphorylation-%%-GO:0006915-&&-apoptotic process-%%-GO:0016055-&&-Wnt signaling pathway-%%-GO:0007257-&&-activation of JUN kinase activity-%%-GO:0007368-&&-determination of left/right symmetry-%%-GO:0010800-&&-positive regulation of peptidyl-threonine phosphorylation-%%-GO:0045893-&&-…	["KEGG-&-1&-hsa04550-&&-Signaling pathways regulating pluripotency of stem cells-%%-hsa05224-&&-Breast cancer-%%-hsa04310-&&-Wnt signaling pathway-%%-hsa05225-&&-Hepatocellular carcinoma-%%-hsa05213-&&-Endometrial cancer-%%-hsa05165-&&-Human papillomavirus infection-%%-hsa05226-&&-Gastric cancer-%%-hsa04390-&&-Hippo signaling pathway-%%-hsa05200-&&-Pathways in cancer-%%-hsa05210-&&-Colorectal can…	AXIN1	Homo sapiens (Human)-&&-9606	taxon:9606	["Gene Symbol-&-1&-AXIN1"]	[""]	FALSE	23	23
PICALM	PICALM	G:9606:PICALM	176318	1902	phosphatidylinositol binding clathrin assembly protein	gene	["biological_process-&-1&-GO:0016192-&&-vesicle-mediated transport-%%-GO:0006461-&&-protein complex assembly-%%-GO:0006898-&&-receptor-mediated endocytosis-%%-GO:0007409-&&-axonogenesis-%%-GO:0008283-&&-cell proliferation-%%-GO:0010629-&&-negative regulation of gene expression-%%-GO:0016188-&&-synaptic vesicle maturation-%%-GO:0016197-&&-endosomal transport-%%-GO:0045893-&&-positive regulation of…	[""]	PICALM	Homo sapiens (Human)-&&-9606	taxon:9606	["Gene Symbol-&-1&-PICALM"]	[""]	FALSE	39	39
RHOA	RHOA	G:9606:RHOA	182466	1902	ras homolog family member A	gene	["biological_process-&-1&-GO:0030036-&&-actin cytoskeleton organization-%%-GO:0007179-&&-transforming growth factor beta receptor signaling pathway-%%-GO:0007266-&&-Rho protein signal transduction-%%-GO:0016032-&&-viral process-%%-GO:0016477-&&-cell migration-%%-GO:0016579-&&-protein deubiquitination-%%-GO:0021762-&&-substantia nigra development-%%-GO:0030168-&&-platelet activation-%%-GO:0030334-…	["KEGG-&-1&-hsa04062-&&-Chemokine signaling pathway-%%-hsa04520-&&-Adherens junction-%%-hsa04810-&&-Regulation of actin cytoskeleton-%%-hsa04072-&&-Phospholipase D signaling pathway-%%-hsa04144-&&-Endocytosis-%%-hsa04611-&&-Platelet activation-%%-hsa04510-&&-Focal adhesion-%%-hsa04310-&&-Wnt signaling pathway-%%-hsa05100-&&-Bacterial invasion of epithelial cells-%%-hsa04722-&&-Neurotrophin signal…	RHOA	Homo sapiens (Human)-&&-9606	taxon:9606	["Gene Symbol-&-1&-RHOA"]	[""]	FALSE	41	41
HIST1H4I	HIST1H4I	G:9606:HIST1H4I	176320	1902	histone cluster 1 H4 family member i	gene	["biological_process-&-1&-GO:0000183-&&-chromatin silencing at rDNA-%%-GO:0006334-&&-nucleosome assembly-%%-GO:0006303-&&-double-strand break repair via nonhomologous end joining-%%-GO:0006335-&&-DNA replication-dependent nucleosome assembly-%%-GO:0006336-&&-DNA replication-independent nucleosome assembly-%%-GO:0006352-&&-DNA-templated transcription, initiation-%%-GO:0016233-&&-telomere capping-%…	["KEGG-&-1&-hsa05322-&&-Systemic lupus erythematosus-%%-hsa05203-&&-Viral carcinogenesis-%%-hsa05034-&&-Alcoholism"]	HIST1H4I	Homo sapiens (Human)-&&-9606	taxon:9606	["Gene Symbol-&-1&-HIST1H4I"]	[""]	FALSE	85	65.4613	85
RHOC	RHOC	G:9606:RHOC	182464	1902	ras homolog family member C	gene	["biological_process-&-1&-GO:0000910-&&-cytokinesis-%%-GO:0007264-&&-small GTPase mediated signal transduction-%%-GO:0043123-&&-positive regulation of I-kappaB kinase/NF-kappaB signaling-%%-GO:0043297-&&-apical junction assembly-%%-GO:0044319-&&-wound healing, spreading of cells-%%-GO:0051056-&&-regulation of small GTPase mediated signal transduction-%%-GO:0060193-&&-positive regulation of lipase…	[""]	RHOC	Homo sapiens (Human)-&&-9606	taxon:9606	["Gene Symbol-&-1&-RHOC"]	[""]	FALSE	9	9
RNF5	RNF5	G:9606:RNF5	178369	1902	ring finger protein 5	gene	["biological_process-&-1&-GO:0042787-&&-protein ubiquitination involved in ubiquitin-dependent protein catabolic process-%%-GO:0009617-&&-response to bacterium-%%-GO:0010507-&&-negative regulation of autophagy-%%-GO:0031648-&&-protein destabilization-%%-GO:0036503-&&-ERAD pathway-%%-GO:0044257-&&-cellular protein catabolic process-%%-GO:0055085-&&-transmembrane transport-%%-GO:0070534-&&-protein …	["KEGG-&-1&-hsa04141-&&-Protein processing in endoplasmic reticulum"]	RNF5	Homo sapiens (Human)-&&-9606	taxon:9606	["Gene Symbol-&-1&-RNF5"]	[""]	FALSE	12	12
NCKAP1	NCKAP1	G:9606:NCKAP1	174273	1902	NCK associated protein 1	gene	["biological_process-&-1&-GO:0006915-&&-apoptotic process-%%-GO:0007417-&&-central nervous system development-%%-GO:0016032-&&-viral process-%%-GO:0010592-&&-positive regulation of lamellipodium assembly-%%-GO:0016601-&&-Rac protein signal transduction-%%-GO:0038096-&&-Fc-gamma receptor signaling pathway involved in phagocytosis-%%-GO:0048010-&&-vascular endothelial growth factor receptor signali…	["KEGG-&-1&-hsa04810-&&-Regulation of actin cytoskeleton"]	NCKAP1	Homo sapiens (Human)-&&-9606	taxon:9606	["Gene Symbol-&-1&-NCKAP1"]	[""]	FALSE	11	11
HIST3H3	HIST3H3	G:9606:HIST3H3	176324	1902	histone cluster 3 H3	gene	["biological_process-&-1&-GO:0006334-&&-nucleosome assembly-%%-GO:0006303-&&-double-strand break repair via nonhomologous end joining-%%-GO:0016233-&&-telomere capping-%%-GO:0032460-&&-negative regulation of protein oligomerization-%%-GO:0051290-&&-protein heterotetramerization","cellular_component-&-1&-GO:0000786-&&-nucleosome-%%-GO:0000788-&&-nuclear nucleosome-%%-GO:0005634-&&-nucleus-%%-GO:00…	["KEGG-&-1&-hsa05322-&&-Systemic lupus erythematosus-%%-hsa05034-&&-Alcoholism-%%-hsa05202-&&-Transcriptional misregulation in cancer"]	HIST3H3	Homo sapiens (Human)-&&-9606	taxon:9606	["Gene Symbol-&-1&-HIST3H3"]	[""]	FALSE	60	60
CNNM3	CNNM3	G:9606:CNNM3	172234	1902	cyclin and CBS domain divalent metal cation transport mediator 3	gene	["biological_process-&-1&-GO:0006811-&&-ion transport","cellular_component-&-1&-GO:0005886-&&-plasma membrane-%%-GO:0016021-&&-integral component of membrane-%%-GO:0016020-&&-membrane","molecular_function-&-1&-GO:0005515-&&-protein binding"]	[""]	CNNM3	Homo sapiens (Human)-&&-9606	taxon:9606	["Gene Symbol-&-1&-CNNM3"]	[""]	FALSE	5	5
ARF1	ARF1	G:9606:ARF1	182475	1902	ADP ribosylation factor 1	gene	["biological_process-&-1&-GO:0002090-&&-regulation of receptor internalization-%%-GO:0006661-&&-phosphatidylinositol biosynthetic process-%%-GO:0006878-&&-cellular copper ion homeostasis-%%-GO:0006892-&&-post-Golgi vesicle-mediated transport-%%-GO:0055108-&&-Golgi to transport vesicle transport-%%-GO:0007015-&&-actin filament organization-%%-GO:0007264-&&-small GTPase mediated signal transduction…	["KEGG-&-1&-hsa04072-&&-Phospholipase D signaling pathway-%%-hsa04144-&&-Endocytosis-%%-hsa05134-&&-Legionellosis-%%-hsa05110-&&-Vibrio cholerae infection"]	ARF1	Homo sapiens (Human)-&&-9606	taxon:9606	["Gene Symbol-&-1&-ARF1"]	[""]	FALSE	21	21
ARF4	ARF4	G:9606:ARF4	182473	1902	ADP ribosylation factor 4	gene	["biological_process-&-1&-GO:0006471-&&-protein ADP-ribosylation-%%-GO:0006888-&&-ER to Golgi vesicle-mediated transport-%%-GO:0006890-&&-retrograde vesicle-mediated transport, Golgi to ER-%%-GO:0007173-&&-epidermal growth factor receptor signaling pathway-%%-GO:0007264-&&-small GTPase mediated signal transduction-%%-GO:0007420-&&-brain development-%%-GO:0007612-&&-learning-%%-GO:0043066-&&-negat…	[""]	ARF4	Homo sapiens (Human)-&&-9606	taxon:9606	["Gene Symbol-&-1&-ARF4"]	[""]	FALSE	22	22
AREG	AREG	G:9606:AREG	182476	1902	amphiregulin	gene	["biological_process-&-1&-GO:0007267-&&-cell-cell signaling-%%-GO:0006888-&&-ER to Golgi vesicle-mediated transport-%%-GO:0007173-&&-epidermal growth factor receptor signaling pathway-%%-GO:0007186-&&-G-protein coupled receptor signaling pathway-%%-GO:0008283-&&-cell proliferation-%%-GO:0008284-&&-positive regulation of cell proliferation-%%-GO:0014009-&&-glial cell proliferation-%%-GO:0031175-&&…	["KEGG-&-1&-hsa04151-&&-PI3K-Akt signaling pathway-%%-hsa04012-&&-ErbB signaling pathway-%%-hsa04010-&&-MAPK signaling pathway-%%-hsa04390-&&-Hippo signaling pathway-%%-hsa05210-&&-Colorectal cancer"]	AREG	Homo sapiens (Human)-&&-9606	taxon:9606	["Gene Symbol-&-1&-AREG"]	[""]	FALSE	5	5
AR	AR	G:9606:AR	182481	1902	androgen receptor	gene	["biological_process-&-1&-GO:0016049-&&-cell growth-%%-GO:0001701-&&-in utero embryonic development-%%-GO:0007267-&&-cell-cell signaling-%%-GO:0003073-&&-regulation of systemic arterial blood pressure-%%-GO:0003382-&&-epithelial cell morphogenesis-%%-GO:0007165-&&-signal transduction-%%-GO:0006351-&&-transcription, DNA-templated-%%-GO:0006367-&&-transcription initiation from RNA polymerase II pro…	["KEGG-&-1&-hsa04114-&&-Oocyte meiosis-%%-hsa05215-&&-Prostate cancer-%%-hsa05200-&&-Pathways in cancer"]	AR	Homo sapiens (Human)-&&-9606	taxon:9606	["Gene Symbol-&-1&-AR"]	[""]	FALSE	117	115.284	117
CCR10	CCR10	G:9606:CCR10	180438	1902	C-C motif chemokine receptor 10	gene	["biological_process-&-1&-GO:0006935-&&-chemotaxis-%%-GO:0006955-&&-immune response-%%-GO:0007186-&&-G-protein coupled receptor signaling pathway-%%-GO:0007204-&&-positive regulation of cytosolic calcium ion concentration-%%-GO:0070098-&&-chemokine-mediated signaling pathway","cellular_component-&-1&-GO:0005886-&&-plasma membrane-%%-GO:0005887-&&-integral component of plasma membrane-%%-GO:000998…	["KEGG-&-1&-hsa04062-&&-Chemokine signaling pathway-%%-hsa04060-&&-Cytokine-cytokine receptor interaction-%%-hsa04672-&&-Intestinal immune network for IgA production"]	CCR10	Homo sapiens (Human)-&&-9606	taxon:9606	["Gene Symbol-&-1&-CCR10"]	[""]	FALSE	5	5
AQP3	AQP3	G:9606:AQP3	182487	1902	aquaporin 3 (Gill blood group)	gene	["biological_process-&-1&-GO:0002684-&&-positive regulation of immune system process-%%-GO:0003091-&&-renal water homeostasis-%%-GO:0006810-&&-transport-%%-GO:0006833-&&-water transport-%%-GO:0007588-&&-excretion-%%-GO:0015793-&&-glycerol transport-%%-GO:0015840-&&-urea transport-%%-GO:0032526-&&-response to retinoic acid-%%-GO:0033280-&&-response to vitamin D-%%-GO:0042476-&&-odontogenesis-%%-GO…	["KEGG-&-1&-hsa04962-&&-Vasopressin-regulated water reabsorption"]	AQP3	Homo sapiens (Human)-&&-9606	taxon:9606	["Gene Symbol-&-1&-AQP3"]	[""]	FALSE	2	2
GPC1	GPC1	G:9606:GPC1	180446	1902	glypican 1	gene	["biological_process-&-1&-GO:0001523-&&-retinoid metabolic process-%%-GO:0006024-&&-glycosaminoglycan biosynthetic process-%%-GO:0006027-&&-glycosaminoglycan catabolic process-%%-GO:0007411-&&-axon guidance-%%-GO:0014037-&&-Schwann cell differentiation-%%-GO:0030200-&&-heparan sulfate proteoglycan catabolic process-%%-GO:0030203-&&-glycosaminoglycan metabolic process-%%-GO:0032288-&&-myelin assem…	["KEGG-&-1&-hsa05418-&&-Fluid shear stress and atherosclerosis-%%-hsa05205-&&-Proteoglycans in cancer"]	GPC1	Homo sapiens (Human)-&&-9606	taxon:9606	["Gene Symbol-&-1&-GPC1"]	[""]	FALSE	4	4
FAM162A	FAM162A	G:9606:FAM162A	172255	1902	family with sequence similarity 162 member A	gene	["biological_process-&-1&-GO:0006919-&&-activation of cysteine-type endopeptidase activity involved in apoptotic process-%%-GO:0043065-&&-positive regulation of apoptotic process-%%-GO:0051402-&&-neuron apoptotic process-%%-GO:0071456-&&-cellular response to hypoxia-%%-GO:0090200-&&-positive regulation of release of cytochrome c from mitochondria","cellular_component-&-1&-GO:0016021-&&-integral c…	[""]	FAM162A	Homo sapiens (Human)-&&-9606	taxon:9606	["Gene Symbol-&-1&-FAM162A"]	[""]	FALSE	8	8
FAS	FAS	G:9606:FAS	182492	1902	Fas cell surface death receptor	gene	["biological_process-&-1&-GO:0002377-&&-immunoglobulin production-%%-GO:0003014-&&-renal system process-%%-GO:0006915-&&-apoptotic process-%%-GO:0007165-&&-signal transduction-%%-GO:0006461-&&-protein complex assembly-%%-GO:0006919-&&-activation of cysteine-type endopeptidase activity involved in apoptotic process-%%-GO:0006924-&&-activation-induced cell death of T cells-%%-GO:0006925-&&-inflamma…	["KEGG-&-1&-hsa04060-&&-Cytokine-cytokine receptor interaction-%%-hsa04940-&&-Type I diabetes mellitus-%%-hsa04210-&&-Apoptosis-%%-hsa05169-&&-Epstein-Barr virus infection-%%-hsa05320-&&-Autoimmune thyroid disease-%%-hsa05160-&&-Hepatitis C-%%-hsa05163-&&-Human cytomegalovirus infection-%%-hsa04115-&&-p53 signaling pathway-%%-hsa04668-&&-TNF signaling pathway-%%-hsa05142-&&-Chagas disease (Americ…	FAS	Homo sapiens (Human)-&&-9606	taxon:9606	["Gene Symbol-&-1&-FAS"]	[""]	FALSE	35	35
USP11	USP11	G:9606:USP11	176349	1902	ubiquitin specific peptidase 11	gene	["biological_process-&-1&-GO:0006511-&&-ubiquitin-dependent protein catabolic process-%%-GO:0016579-&&-protein deubiquitination","cellular_component-&-1&-GO:0005829-&&-cytosol-%%-GO:0005634-&&-nucleus-%%-GO:0005654-&&-nucleoplasm-%%-GO:0005694-&&-chromosome","molecular_function-&-1&-GO:0005515-&&-protein binding-%%-GO:0004197-&&-cysteine-type endopeptidase activity-%%-GO:0004843-&&-thiol-dependen…	[""]	USP11	Homo sapiens (Human)-&&-9606	taxon:9606	["Gene Symbol-&-1&-USP11"]	[""]	FALSE	19	19
CHRNA9	CHRNA9	G:9606:CHRNA9	170211	1902	cholinergic receptor nicotinic alpha 9 subunit	gene	["biological_process-&-1&-GO:0007204-&&-positive regulation of cytosolic calcium ion concentration-%%-GO:0042472-&&-inner ear morphogenesis-%%-GO:0050910-&&-detection of mechanical stimulus involved in sensory perception of sound-%%-GO:0060079-&&-excitatory postsynaptic potential-%%-GO:0070588-&&-calcium ion transmembrane transport","cellular_component-&-1&-GO:0005886-&&-plasma membrane-%%-GO:000…	["KEGG-&-1&-hsa04080-&&-Neuroactive ligand-receptor interaction"]	CHRNA9	Homo sapiens (Human)-&&-9606	taxon:9606	["Gene Symbol-&-1&-CHRNA9"]	[""]	FALSE	4	4
ADCY6	ADCY6	G:9606:ADCY6	182499	1902	adenylate cyclase 6	gene	["biological_process-&-1&-GO:0035811-&&-negative regulation of urine volume-%%-GO:0003091-&&-renal water homeostasis-%%-GO:0035556-&&-intracellular signal transduction-%%-GO:0006171-&&-cAMP biosynthetic process-%%-GO:0006182-&&-cGMP biosynthetic process-%%-GO:0007189-&&-adenylate cyclase-activating G-protein coupled receptor signaling pathway-%%-GO:0007190-&&-activation of adenylate cyclase activ…	["KEGG-&-1&-hsa04062-&&-Chemokine signaling pathway-%%-hsa04072-&&-Phospholipase D signaling pathway-%%-hsa04611-&&-Platelet activation-%%-hsa04916-&&-Melanogenesis-%%-hsa01522-&&-Endocrine resistance-%%-hsa05032-&&-Morphine addiction-%%-hsa04972-&&-Pancreatic secretion-%%-hsa04713-&&-Circadian entrainment-%%-hsa04962-&&-Vasopressin-regulated water reabsorption-%%-hsa05414-&&-Dilated cardiomyopat…	ADCY6	Homo sapiens (Human)-&&-9606	taxon:9606	["Gene Symbol-&-1&-ADCY6"]	[""]	FALSE	2	2
DGCR14	DGCR14	G:9606:DGCR14	176358	1902	DiGeorge syndrome critical region gene 14	gene	["biological_process-&-1&-GO:0000398-&&-mRNA splicing, via spliceosome-%%-GO:0007399-&&-nervous system development","cellular_component-&-1&-GO:0005634-&&-nucleus-%%-GO:0071013-&&-catalytic step 2 spliceosome","molecular_function-&-1&-GO:0005515-&&-protein binding-%%-GO:0003674-&&-molecular_function"]	[""]	DGCR14	Homo sapiens (Human)-&&-9606	taxon:9606	["Gene Symbol-&-1&-DGCR14"]	[""]	FALSE	17	17
ADCY5	ADCY5	G:9606:ADCY5	182500	1902	adenylate cyclase 5	gene	["biological_process-&-1&-GO:0001973-&&-adenosine receptor signaling pathway-%%-GO:0003091-&&-renal water homeostasis-%%-GO:0035556-&&-intracellular signal transduction-%%-GO:0006171-&&-cAMP biosynthetic process-%%-GO:0006182-&&-cGMP biosynthetic process-%%-GO:0007189-&&-adenylate cyclase-activating G-protein coupled receptor signaling pathway-%%-GO:0007190-&&-activation of adenylate cyclase acti…	["KEGG-&-1&-hsa04062-&&-Chemokine signaling pathway-%%-hsa04072-&&-Phospholipase D signaling pathway-%%-hsa04916-&&-Melanogenesis-%%-hsa04611-&&-Platelet activation-%%-hsa01522-&&-Endocrine resistance-%%-hsa05032-&&-Morphine addiction-%%-hsa04972-&&-Pancreatic secretion-%%-hsa04713-&&-Circadian entrainment-%%-hsa05414-&&-Dilated cardiomyopathy (DCM)-%%-hsa05012-&&-Parkinson disease-%%-hsa04728-&&…	ADCY5	Homo sapiens (Human)-&&-9606	taxon:9606	["Gene Symbol-&-1&-ADCY5"]	[""]	FALSE	4	4
PF4	PF4	G:9606:PF4	178404	1902	platelet factor 4	gene	["biological_process-&-1&-GO:0002576-&&-platelet degranulation-%%-GO:0006954-&&-inflammatory response-%%-GO:0006955-&&-immune response-%%-GO:0007186-&&-G-protein coupled receptor signaling pathway-%%-GO:0010628-&&-positive regulation of gene expression-%%-GO:0010744-&&-positive regulation of macrophage derived foam cell differentiation-%%-GO:0016525-&&-negative regulation of angiogenesis-%%-GO:00…	["KEGG-&-1&-hsa04062-&&-Chemokine signaling pathway-%%-hsa04060-&&-Cytokine-cytokine receptor interaction"]	PF4	Homo sapiens (Human)-&&-9606	taxon:9606	["Gene Symbol-&-1&-PF4"]	[""]	FALSE	6	6
ADCY3	ADCY3	G:9606:ADCY3	182501	1902	adenylate cyclase 3	gene	["biological_process-&-1&-GO:0003091-&&-renal water homeostasis-%%-GO:0007165-&&-signal transduction-%%-GO:0035556-&&-intracellular signal transduction-%%-GO:0006171-&&-cAMP biosynthetic process-%%-GO:0006182-&&-cGMP biosynthetic process-%%-GO:0007189-&&-adenylate cyclase-activating G-protein coupled receptor signaling pathway-%%-GO:0007190-&&-activation of adenylate cyclase activity-%%-GO:000719…	["KEGG-&-1&-hsa04062-&&-Chemokine signaling pathway-%%-hsa04072-&&-Phospholipase D signaling pathway-%%-hsa04611-&&-Platelet activation-%%-hsa04916-&&-Melanogenesis-%%-hsa01522-&&-Endocrine resistance-%%-hsa05032-&&-Morphine addiction-%%-hsa04020-&&-Calcium signaling pathway-%%-hsa04972-&&-Pancreatic secretion-%%-hsa04713-&&-Circadian entrainment-%%-hsa04962-&&-Vasopressin-regulated water reabsor…	ADCY3	Homo sapiens (Human)-&&-9606	taxon:9606	["Gene Symbol-&-1&-ADCY3"]	[""]	FALSE	5	5
ID1	ID1	G:9606:ID1	180453	1902	inhibitor of DNA binding 1, HLH protein	gene	["biological_process-&-1&-GO:0000122-&&-negative regulation of transcription from RNA polymerase II promoter-%%-GO:0001525-&&-angiogenesis-%%-GO:0001886-&&-endothelial cell morphogenesis-%%-GO:0006351-&&-transcription, DNA-templated-%%-GO:0007179-&&-transforming growth factor beta receptor signaling pathway-%%-GO:0007420-&&-brain development-%%-GO:0007507-&&-heart development-%%-GO:0007623-&&-cir…	["KEGG-&-1&-hsa04550-&&-Signaling pathways regulating pluripotency of stem cells-%%-hsa04015-&&-Rap1 signaling pathway-%%-hsa04350-&&-TGF-beta signaling pathway-%%-hsa04390-&&-Hippo signaling pathway"]	ID1	Homo sapiens (Human)-&&-9606	taxon:9606	["Gene Symbol-&-1&-ID1"]	[""]	FALSE	9	9
ICAM1	ICAM1	G:9606:ICAM1	180462	1902	intercellular adhesion molecule 1	gene	["biological_process-&-1&-GO:0001541-&&-ovarian follicle development-%%-GO:0007157-&&-heterophilic cell-cell adhesion via plasma membrane cell adhesion molecules-%%-GO:0001910-&&-regulation of leukocyte mediated cytotoxicity-%%-GO:0001975-&&-response to amphetamine-%%-GO:0002291-&&-T cell activation via T cell receptor contact with antigen bound to MHC molecule on antigen presenting cell-%%-GO:00…	["KEGG-&-1&-hsa05144-&&-Malaria-%%-hsa04064-&&-NF-kappa B signaling pathway-%%-hsa05150-&&-Staphylococcus aureus infection-%%-hsa05143-&&-African trypanosomiasis-%%-hsa04933-&&-AGE-RAGE signaling pathway in diabetic complications-%%-hsa05169-&&-Epstein-Barr virus infection-%%-hsa05418-&&-Fluid shear stress and atherosclerosis-%%-hsa05323-&&-Rheumatoid arthritis-%%-hsa05166-&&-Human T-cell leukemi…	ICAM1	Homo sapiens (Human)-&&-9606	taxon:9606	["Gene Symbol-&-1&-ICAM1"]	["ICAM1"]	TRUE	159	172.417	159
PEPD	PEPD	G:9606:PEPD	178415	1902	peptidase D	gene	["biological_process-&-1&-GO:0006508-&&-proteolysis-%%-GO:0006520-&&-cellular amino acid metabolic process-%%-GO:0030574-&&-collagen catabolic process","cellular_component-&-1&-GO:0070062-&&-extracellular exosome","molecular_function-&-1&-GO:0005515-&&-protein binding-%%-GO:0004177-&&-aminopeptidase activity-%%-GO:0004181-&&-metallocarboxypeptidase activity-%%-GO:0030145-&&-manganese ion binding-…	[""]	PEPD	Homo sapiens (Human)-&&-9606	taxon:9606	["Gene Symbol-&-1&-PEPD"]	[""]	FALSE	9	9
NCOA3	NCOA3	G:9606:NCOA3	176370	1902	nuclear receptor coactivator 3	gene	["biological_process-&-1&-GO:0006351-&&-transcription, DNA-templated-%%-GO:0010628-&&-positive regulation of gene expression-%%-GO:0045893-&&-positive regulation of transcription, DNA-templated-%%-GO:0016573-&&-histone acetylation-%%-GO:0030521-&&-androgen receptor signaling pathway-%%-GO:0030522-&&-intracellular receptor signaling pathway-%%-GO:0032870-&&-cellular response to hormone stimulus-%%…	["KEGG-&-1&-hsa01522-&&-Endocrine resistance-%%-hsa05224-&&-Breast cancer-%%-hsa04919-&&-Thyroid hormone signaling pathway-%%-hsa04915-&&-Estrogen signaling pathway-%%-hsa05200-&&-Pathways in cancer"]	NCOA3	Homo sapiens (Human)-&&-9606	taxon:9606	["Gene Symbol-&-1&-NCOA3"]	[""]	FALSE	59	59
IARS	IARS	G:9606:IARS	180466	1902	isoleucyl-tRNA synthetase	gene	["biological_process-&-1&-GO:0001649-&&-osteoblast differentiation-%%-GO:0006418-&&-tRNA aminoacylation for protein translation-%%-GO:0006428-&&-isoleucyl-tRNA aminoacylation-%%-GO:0006450-&&-regulation of translational fidelity","cellular_component-&-1&-GO:0016020-&&-membrane-%%-GO:0005829-&&-cytosol-%%-GO:0005737-&&-cytoplasm-%%-GO:0070062-&&-extracellular exosome","molecular_function-&-1&-GO:0…	["KEGG-&-1&-hsa00970-&&-Aminoacyl-tRNA biosynthesis"]	IARS	Homo sapiens (Human)-&&-9606	taxon:9606	["Gene Symbol-&-1&-IARS"]	[""]	FALSE	41	41
NRIP1	NRIP1	G:9606:NRIP1	176369	1902	nuclear receptor interacting protein 1	gene	["biological_process-&-1&-GO:0000122-&&-negative regulation of transcription from RNA polymerase II promoter-%%-GO:0001543-&&-ovarian follicle rupture-%%-GO:0006351-&&-transcription, DNA-templated-%%-GO:0007623-&&-circadian rhythm-%%-GO:0045893-&&-positive regulation of transcription, DNA-templated-%%-GO:0019915-&&-lipid storage-%%-GO:0030521-&&-androgen receptor signaling pathway-%%-GO:0032922-&…	[""]	NRIP1	Homo sapiens (Human)-&&-9606	taxon:9606	["Gene Symbol-&-1&-NRIP1"]	[""]	FALSE	19	19
ACTN1	ACTN1	G:9606:ACTN1	182521	1902	actinin alpha 1	gene	["biological_process-&-1&-GO:0002576-&&-platelet degranulation-%%-GO:0051017-&&-actin filament bundle assembly-%%-GO:0007015-&&-actin filament organization-%%-GO:0042981-&&-regulation of apoptotic process-%%-GO:0030168-&&-platelet activation-%%-GO:0030220-&&-platelet formation-%%-GO:0036344-&&-platelet morphogenesis-%%-GO:0048041-&&-focal adhesion assembly-%%-GO:0051271-&&-negative regulation of …	["KEGG-&-1&-hsa04520-&&-Adherens junction-%%-hsa04810-&&-Regulation of actin cytoskeleton-%%-hsa05146-&&-Amoebiasis-%%-hsa04510-&&-Focal adhesion-%%-hsa04670-&&-Leukocyte transendothelial migration-%%-hsa04530-&&-Tight junction-%%-hsa05322-&&-Systemic lupus erythematosus-%%-hsa05203-&&-Viral carcinogenesis"]	ACTN1	Homo sapiens (Human)-&&-9606	taxon:9606	["Gene Symbol-&-1&-ACTN1"]	[""]	FALSE	44	44
HTR4	HTR4	G:9606:HTR4	180476	1902	5-hydroxytryptamine receptor 4	gene	["biological_process-&-1&-GO:0007186-&&-G-protein coupled receptor signaling pathway-%%-GO:0007187-&&-G-protein coupled receptor signaling pathway, coupled to cyclic nucleotide second messenger-%%-GO:0007214-&&-gamma-aminobutyric acid signaling pathway-%%-GO:0007268-&&-chemical synaptic transmission-%%-GO:0032098-&&-regulation of appetite-%%-GO:0098664-&&-G-protein coupled serotonin receptor sign…	["KEGG-&-1&-hsa04024-&&-cAMP signaling pathway-%%-hsa04020-&&-Calcium signaling pathway-%%-hsa04080-&&-Neuroactive ligand-receptor interaction-%%-hsa04726-&&-Serotonergic synapse"]	HTR4	Homo sapiens (Human)-&&-9606	taxon:9606	["Gene Symbol-&-1&-HTR4"]	[""]	FALSE	1	1
ACTN4	ACTN4	G:9606:ACTN4	182525	1902	actinin alpha 4	gene	["biological_process-&-1&-GO:0001666-&&-response to hypoxia-%%-GO:0002576-&&-platelet degranulation-%%-GO:0051017-&&-actin filament bundle assembly-%%-GO:0015031-&&-protein transport-%%-GO:0042981-&&-regulation of apoptotic process-%%-GO:0030050-&&-vesicle transport along actin filament-%%-GO:0030335-&&-positive regulation of cell migration-%%-GO:0032417-&&-positive regulation of sodium:proton an…	["KEGG-&-1&-hsa04520-&&-Adherens junction-%%-hsa04810-&&-Regulation of actin cytoskeleton-%%-hsa05146-&&-Amoebiasis-%%-hsa04510-&&-Focal adhesion-%%-hsa04670-&&-Leukocyte transendothelial migration-%%-hsa04530-&&-Tight junction-%%-hsa05322-&&-Systemic lupus erythematosus-%%-hsa05203-&&-Viral carcinogenesis"]	ACTN4	Homo sapiens (Human)-&&-9606	taxon:9606	["Gene Symbol-&-1&-ACTN4"]	[""]	FALSE	44	44
LOC107984053	LOC107984053	G:9606:LOC107984053	127233	1902	bolA-like protein 2	gene	[""]	[""]	LOC107984053	Homo sapiens (Human)-&&-9606	taxon:9606	["Gene Symbol-&-1&-LOC107984053"]	[""]	FALSE	17	17
PDHB	PDHB	G:9606:PDHB	178435	1902	pyruvate dehydrogenase (lipoamide) beta	gene	["biological_process-&-1&-GO:0006006-&&-glucose metabolic process-%%-GO:0006086-&&-acetyl-CoA biosynthetic process from pyruvate-%%-GO:0006090-&&-pyruvate metabolic process-%%-GO:0006099-&&-tricarboxylic acid cycle-%%-GO:0010510-&&-regulation of acetyl-CoA biosynthetic process from pyruvate-%%-GO:0046487-&&-glyoxylate metabolic process-%%-GO:0061732-&&-mitochondrial acetyl-CoA biosynthetic proces…	["KEGG-&-1&-hsa04922-&&-Glucagon signaling pathway-%%-hsa00010-&&-Glycolysis / Gluconeogenesis-%%-hsa00620-&&-Pyruvate metabolism-%%-hsa00020-&&-Citrate cycle (TCA cycle)-%%-hsa01200-&&-Carbon metabolism-%%-hsa01100-&&-Metabolic pathways-%%-hsa04066-&&-HIF-1 signaling pathway-%%-hsa05230-&&-Central carbon metabolism in cancer"]	PDHB	Homo sapiens (Human)-&&-9606	taxon:9606	["Gene Symbol-&-1&-PDHB"]	[""]	FALSE	22	22
CCT8	CCT8	G:9606:CCT8	174337	1902	chaperonin containing TCP1 subunit 8	gene	["biological_process-&-1&-GO:0006457-&&-protein folding-%%-GO:0006458-&&-'de novo' protein folding-%%-GO:0007339-&&-binding of sperm to zona pellucida-%%-GO:0046931-&&-pore complex assembly-%%-GO:0050821-&&-protein stabilization-%%-GO:0032212-&&-positive regulation of telomere maintenance via telomerase-%%-GO:0043312-&&-neutrophil degranulation-%%-GO:0061077-&&-chaperone-mediated protein folding-…	[""]	CCT8	Homo sapiens (Human)-&&-9606	taxon:9606	["Gene Symbol-&-1&-CCT8"]	[""]	FALSE	48	48
HTR1F	HTR1F	G:9606:HTR1F	180481	1902	5-hydroxytryptamine receptor 1F	gene	["biological_process-&-1&-GO:0007187-&&-G-protein coupled receptor signaling pathway, coupled to cyclic nucleotide second messenger-%%-GO:0007193-&&-adenylate cyclase-inhibiting G-protein coupled receptor signaling pathway-%%-GO:0007268-&&-chemical synaptic transmission-%%-GO:0098664-&&-G-protein coupled serotonin receptor signaling pathway","cellular_component-&-1&-GO:0005886-&&-plasma membrane-…	["KEGG-&-1&-hsa04024-&&-cAMP signaling pathway-%%-hsa04080-&&-Neuroactive ligand-receptor interaction-%%-hsa04742-&&-Taste transduction-%%-hsa04726-&&-Serotonergic synapse"]	HTR1F	Homo sapiens (Human)-&&-9606	taxon:9606	["Gene Symbol-&-1&-HTR1F"]	[""]	FALSE	1	1
PDGFRB	PDGFRB	G:9606:PDGFRB	178438	1902	platelet derived growth factor receptor beta	gene	["biological_process-&-1&-GO:0000165-&&-MAPK cascade-%%-GO:0007165-&&-signal transduction-%%-GO:0006024-&&-glycosaminoglycan biosynthetic process-%%-GO:0007186-&&-G-protein coupled receptor signaling pathway-%%-GO:0007568-&&-aging-%%-GO:0043066-&&-negative regulation of apoptotic process-%%-GO:0008284-&&-positive regulation of cell proliferation-%%-GO:0008584-&&-male gonad development-%%-GO:00096…	["KEGG-&-1&-hsa04540-&&-Gap junction-%%-hsa04072-&&-Phospholipase D signaling pathway-%%-hsa04810-&&-Regulation of actin cytoskeleton-%%-hsa04510-&&-Focal adhesion-%%-hsa01521-&&-EGFR tyrosine kinase inhibitor resistance-%%-hsa04020-&&-Calcium signaling pathway-%%-hsa05165-&&-Human papillomavirus infection-%%-hsa04010-&&-MAPK signaling pathway-%%-hsa05200-&&-Pathways in cancer-%%-hsa04014-&&-Ras …	PDGFRB	Homo sapiens (Human)-&&-9606	taxon:9606	["Gene Symbol-&-1&-PDGFRB"]	[""]	FALSE	41	41
ACTG1	ACTG1	G:9606:ACTG1	182533	1902	actin gamma 1	gene	["biological_process-&-1&-GO:0001895-&&-retina homeostasis-%%-GO:0006928-&&-movement of cell or subcellular component-%%-GO:0009612-&&-response to mechanical stimulus-%%-GO:0034329-&&-cell junction assembly-%%-GO:0038096-&&-Fc-gamma receptor signaling pathway involved in phagocytosis-%%-GO:0045214-&&-sarcomere organization-%%-GO:0048010-&&-vascular endothelial growth factor receptor signaling pat…	["KEGG-&-1&-hsa04520-&&-Adherens junction-%%-hsa04810-&&-Regulation of actin cytoskeleton-%%-hsa04611-&&-Platelet activation-%%-hsa04510-&&-Focal adhesion-%%-hsa04210-&&-Apoptosis-%%-hsa05100-&&-Bacterial invasion of epithelial cells-%%-hsa04390-&&-Hippo signaling pathway-%%-hsa05110-&&-Vibrio cholerae infection-%%-hsa04530-&&-Tight junction-%%-hsa05412-&&-Arrhythmogenic right ventricular cardiom…	ACTG1	Homo sapiens (Human)-&&-9606	taxon:9606	["Gene Symbol-&-1&-ACTG1"]	[""]	FALSE	62	87.2946	62
PDHA1	PDHA1	G:9606:PDHA1	178437	1902	pyruvate dehydrogenase (lipoamide) alpha 1	gene	["biological_process-&-1&-GO:0006006-&&-glucose metabolic process-%%-GO:0006086-&&-acetyl-CoA biosynthetic process from pyruvate-%%-GO:0006090-&&-pyruvate metabolic process-%%-GO:0006099-&&-tricarboxylic acid cycle-%%-GO:0010510-&&-regulation of acetyl-CoA biosynthetic process from pyruvate-%%-GO:0046487-&&-glyoxylate metabolic process-%%-GO:0061732-&&-mitochondrial acetyl-CoA biosynthetic proces…	["KEGG-&-1&-hsa04922-&&-Glucagon signaling pathway-%%-hsa00010-&&-Glycolysis / Gluconeogenesis-%%-hsa00020-&&-Citrate cycle (TCA cycle)-%%-hsa00620-&&-Pyruvate metabolism-%%-hsa01200-&&-Carbon metabolism-%%-hsa01100-&&-Metabolic pathways-%%-hsa04066-&&-HIF-1 signaling pathway-%%-hsa05230-&&-Central carbon metabolism in cancer"]	PDHA1	Homo sapiens (Human)-&&-9606	taxon:9606	["Gene Symbol-&-1&-PDHA1"]	[""]	FALSE	19	19
AKAP1	AKAP1	G:9606:AKAP1	176389	1902	A-kinase anchoring protein 1	gene	["biological_process-&-1&-GO:0007596-&&-blood coagulation-%%-GO:0010738-&&-regulation of protein kinase A signaling","cellular_component-&-1&-GO:0016021-&&-integral component of membrane-%%-GO:0016020-&&-membrane-%%-GO:0005739-&&-mitochondrion-%%-GO:0005829-&&-cytosol-%%-GO:0005741-&&-mitochondrial outer membrane","molecular_function-&-1&-GO:0005515-&&-protein binding-%%-GO:0003723-&&-RNA binding…	[""]	AKAP1	Homo sapiens (Human)-&&-9606	taxon:9606	["Gene Symbol-&-1&-AKAP1"]	[""]	FALSE	11	11
PDGFRA	PDGFRA	G:9606:PDGFRA	178441	1902	platelet derived growth factor receptor alpha	gene	["biological_process-&-1&-GO:0000165-&&-MAPK cascade-%%-GO:0001553-&&-luteinization-%%-GO:0001775-&&-cell activation-%%-GO:0007204-&&-positive regulation of cytosolic calcium ion concentration-%%-GO:0008284-&&-positive regulation of cell proliferation-%%-GO:0016032-&&-viral process-%%-GO:0010544-&&-negative regulation of platelet activation-%%-GO:0010863-&&-positive regulation of phospholipase C …	["KEGG-&-1&-hsa04540-&&-Gap junction-%%-hsa04072-&&-Phospholipase D signaling pathway-%%-hsa04810-&&-Regulation of actin cytoskeleton-%%-hsa04144-&&-Endocytosis-%%-hsa04510-&&-Focal adhesion-%%-hsa01521-&&-EGFR tyrosine kinase inhibitor resistance-%%-hsa04020-&&-Calcium signaling pathway-%%-hsa04010-&&-MAPK signaling pathway-%%-hsa05200-&&-Pathways in cancer-%%-hsa04014-&&-Ras signaling pathway-%…	PDGFRA	Homo sapiens (Human)-&&-9606	taxon:9606	["Gene Symbol-&-1&-PDGFRA"]	[""]	FALSE	26	26
ACTB	ACTB	G:9606:ACTB	182542	1902	actin beta	gene	["biological_process-&-1&-GO:0001895-&&-retina homeostasis-%%-GO:0006928-&&-movement of cell or subcellular component-%%-GO:0016579-&&-protein deubiquitination-%%-GO:0021762-&&-substantia nigra development-%%-GO:0034329-&&-cell junction assembly-%%-GO:0038096-&&-Fc-gamma receptor signaling pathway involved in phagocytosis-%%-GO:0043044-&&-ATP-dependent chromatin remodeling-%%-GO:0045815-&&-positi…	["KEGG-&-1&-hsa04520-&&-Adherens junction-%%-hsa04810-&&-Regulation of actin cytoskeleton-%%-hsa04611-&&-Platelet activation-%%-hsa04510-&&-Focal adhesion-%%-hsa04210-&&-Apoptosis-%%-hsa05100-&&-Bacterial invasion of epithelial cells-%%-hsa04530-&&-Tight junction-%%-hsa05110-&&-Vibrio cholerae infection-%%-hsa04390-&&-Hippo signaling pathway-%%-hsa05412-&&-Arrhythmogenic right ventricular cardiom…	ACTB	Homo sapiens (Human)-&&-9606	taxon:9606	["Gene Symbol-&-1&-ACTB"]	[""]	FALSE	106	211.459	106
GLIPR2	GLIPR2	G:9606:GLIPR2	164109	1902	GLI pathogenesis related 2	gene	["biological_process-&-1&-GO:0010634-&&-positive regulation of epithelial cell migration-%%-GO:0010718-&&-positive regulation of epithelial to mesenchymal transition-%%-GO:0070374-&&-positive regulation of ERK1 and ERK2 cascade","cellular_component-&-1&-GO:0000139-&&-Golgi membrane-%%-GO:0070062-&&-extracellular exosome","molecular_function-&-1&-GO:0042803-&&-protein homodimerization activity"]	[""]	GLIPR2	Homo sapiens (Human)-&&-9606	taxon:9606	["Gene Symbol-&-1&-GLIPR2"]	[""]	FALSE	2	2
HSPD1	HSPD1	G:9606:HSPD1	180499	1902	heat shock protein family D (Hsp60) member 1	gene	["biological_process-&-1&-GO:0001666-&&-response to hypoxia-%%-GO:0002236-&&-detection of misfolded protein-%%-GO:0002368-&&-B cell cytokine production-%%-GO:0002755-&&-MyD88-dependent toll-like receptor signaling pathway-%%-GO:0002842-&&-positive regulation of T cell mediated immune response to tumor cell-%%-GO:0002931-&&-response to ischemia-%%-GO:0006986-&&-response to unfolded protein-%%-GO:0…	["KEGG-&-1&-hsa03018-&&-RNA degradation-%%-hsa04940-&&-Type I diabetes mellitus-%%-hsa05134-&&-Legionellosis-%%-hsa05152-&&-Tuberculosis"]	HSPD1	Homo sapiens (Human)-&&-9606	taxon:9606	["Gene Symbol-&-1&-HSPD1"]	[""]	FALSE	80	133.164	80
ACP5	ACP5	G:9606:ACP5	182547	1902	acid phosphatase 5, tartrate resistant	gene	["biological_process-&-1&-GO:0006771-&&-riboflavin metabolic process-%%-GO:0016311-&&-dephosphorylation","cellular_component-&-1&-GO:0016021-&&-integral component of membrane-%%-GO:0005764-&&-lysosome-%%-GO:0005829-&&-cytosol-%%-GO:0070062-&&-extracellular exosome","molecular_function-&-1&-GO:0003993-&&-acid phosphatase activity-%%-GO:0008198-&&-ferrous iron binding-%%-GO:0008199-&&-ferric iron b…	["KEGG-&-1&-hsa05323-&&-Rheumatoid arthritis-%%-hsa04142-&&-Lysosome-%%-hsa00740-&&-Riboflavin metabolism-%%-hsa01100-&&-Metabolic pathways-%%-hsa04380-&&-Osteoclast differentiation"]	ACP5	Homo sapiens (Human)-&&-9606	taxon:9606	["Gene Symbol-&-1&-ACP5"]	[""]	FALSE	4	4
GAN	GAN	G:9606:GAN	176400	1902	gigaxonin	gene	["biological_process-&-1&-GO:0007010-&&-cytoskeleton organization-%%-GO:0016567-&&-protein ubiquitination","cellular_component-&-1&-GO:0005737-&&-cytoplasm-%%-GO:0005856-&&-cytoskeleton-%%-GO:0031463-&&-Cul3-RING ubiquitin ligase complex","molecular_function-&-1&-GO:0005515-&&-protein binding-%%-GO:0003674-&&-molecular_function-%%-GO:0004842-&&-ubiquitin-protein transferase activity"]	[""]	GAN	Homo sapiens (Human)-&&-9606	taxon:9606	["Gene Symbol-&-1&-GAN"]	[""]	FALSE	71	51.3103	71
DNAJB1	DNAJB1	G:9606:DNAJB1	180496	1902	DnaJ heat shock protein family (Hsp40) member B1	gene	["biological_process-&-1&-GO:0006986-&&-response to unfolded protein-%%-GO:0032781-&&-positive regulation of ATPase activity-%%-GO:0051085-&&-chaperone mediated protein folding requiring cofactor-%%-GO:0070389-&&-chaperone cofactor-dependent protein refolding-%%-GO:0090084-&&-negative regulation of inclusion body assembly-%%-GO:0097201-&&-negative regulation of transcription from RNA polymerase I…	["KEGG-&-1&-hsa04141-&&-Protein processing in endoplasmic reticulum-%%-hsa05164-&&-Influenza A"]	DNAJB1	Homo sapiens (Human)-&&-9606	taxon:9606	["Gene Symbol-&-1&-DNAJB1"]	[""]	FALSE	28	28
HSPE1	HSPE1	G:9606:HSPE1	180497	1902	heat shock protein family E (Hsp10) member 1	gene	["biological_process-&-1&-GO:0001649-&&-osteoblast differentiation-%%-GO:0006457-&&-protein folding-%%-GO:0006986-&&-response to unfolded protein-%%-GO:0006919-&&-activation of cysteine-type endopeptidase activity involved in apoptotic process-%%-GO:0051085-&&-chaperone mediated protein folding requiring cofactor","cellular_component-&-1&-GO:0016020-&&-membrane-%%-GO:0005739-&&-mitochondrion-%%-G…	[""]	HSPE1	Homo sapiens (Human)-&&-9606	taxon:9606	["Gene Symbol-&-1&-HSPE1"]	[""]	FALSE	36	36
HSP90AB1	HSP90AB1	G:9606:HSP90AB1	180501	1902	heat shock protein 90 alpha family class B member 1	gene	["biological_process-&-1&-GO:0001890-&&-placenta development-%%-GO:0006457-&&-protein folding-%%-GO:0006986-&&-response to unfolded protein-%%-GO:0006805-&&-xenobiotic metabolic process-%%-GO:0007004-&&-telomere maintenance via telomerase-%%-GO:0009651-&&-response to salt stress-%%-GO:0050821-&&-protein stabilization-%%-GO:0019062-&&-virion attachment to host cell-%%-GO:0030511-&&-positive regula…	["KEGG-&-1&-hsa04914-&&-Progesterone-mediated oocyte maturation-%%-hsa04612-&&-Antigen processing and presentation-%%-hsa04621-&&-NOD-like receptor signaling pathway-%%-hsa04151-&&-PI3K-Akt signaling pathway-%%-hsa04141-&&-Protein processing in endoplasmic reticulum-%%-hsa04659-&&-Th17 cell differentiation-%%-hsa04657-&&-IL-17 signaling pathway-%%-hsa04915-&&-Estrogen signaling pathway-%%-hsa0520…	HSP90AB1	Homo sapiens (Human)-&&-9606	taxon:9606	["Gene Symbol-&-1&-HSP90AB1"]	[""]	FALSE	155	439.826	155
ACP1	ACP1	G:9606:ACP1	182549	1902	acid phosphatase 1, soluble	gene	["biological_process-&-1&-GO:0035335-&&-peptidyl-tyrosine dephosphorylation","cellular_component-&-1&-GO:0005737-&&-cytoplasm-%%-GO:0009898-&&-cytoplasmic side of plasma membrane-%%-GO:0070062-&&-extracellular exosome","molecular_function-&-1&-GO:0005515-&&-protein binding-%%-GO:0003993-&&-acid phosphatase activity-%%-GO:0004726-&&-non-membrane spanning protein tyrosine phosphatase activity"]	["KEGG-&-1&-hsa04520-&&-Adherens junction-%%-hsa00740-&&-Riboflavin metabolism-%%-hsa00730-&&-Thiamine metabolism-%%-hsa01100-&&-Metabolic pathways"]	ACP1	Homo sapiens (Human)-&&-9606	taxon:9606	["Gene Symbol-&-1&-ACP1"]	[""]	FALSE	18	18
HSP90AA1	HSP90AA1	G:9606:HSP90AA1	180506	1902	heat shock protein 90 alpha family class A member 1	gene	["biological_process-&-1&-GO:0000086-&&-G2/M transition of mitotic cell cycle-%%-GO:0006986-&&-response to unfolded protein-%%-GO:0042026-&&-protein refolding-%%-GO:0007165-&&-signal transduction-%%-GO:0051131-&&-chaperone-mediated protein complex assembly-%%-GO:0006839-&&-mitochondrial transport-%%-GO:0006898-&&-receptor-mediated endocytosis-%%-GO:0007004-&&-telomere maintenance via telomerase-%…	["KEGG-&-1&-hsa04914-&&-Progesterone-mediated oocyte maturation-%%-hsa04612-&&-Antigen processing and presentation-%%-hsa04621-&&-NOD-like receptor signaling pathway-%%-hsa04151-&&-PI3K-Akt signaling pathway-%%-hsa04141-&&-Protein processing in endoplasmic reticulum-%%-hsa04659-&&-Th17 cell differentiation-%%-hsa04657-&&-IL-17 signaling pathway-%%-hsa04217-&&-Necroptosis-%%-hsa05418-&&-Fluid shea…	HSP90AA1	Homo sapiens (Human)-&&-9606	taxon:9606	["Gene Symbol-&-1&-HSP90AA1"]	[""]	FALSE	182	529.001	182
ANP32A	ANP32A	G:9606:ANP32A	176409	1902	acidic nuclear phosphoprotein 32 family member A	gene	["biological_process-&-1&-GO:0035556-&&-intracellular signal transduction-%%-GO:0006351-&&-transcription, DNA-templated-%%-GO:0006355-&&-regulation of transcription, DNA-templated-%%-GO:0006913-&&-nucleocytoplasmic transport-%%-GO:0043488-&&-regulation of mRNA stability","cellular_component-&-1&-GO:0005783-&&-endoplasmic reticulum-%%-GO:0005634-&&-nucleus-%%-GO:0005737-&&-cytoplasm-%%-GO:0005654-…	[""]	ANP32A	Homo sapiens (Human)-&&-9606	taxon:9606	["Gene Symbol-&-1&-ANP32A"]	[""]	FALSE	46	46
H3F3AP4	H3F3AP4	G:9606:H3F3AP4	157977	1902	H3 histone, family 3A, pseudogene 4	gene	[""]	[""]	H3F3AP4	Homo sapiens (Human)-&&-9606	taxon:9606	["Gene Symbol-&-1&-H3F3AP4"]	[""]	FALSE	53	53
HSPA9	HSPA9	G:9606:HSPA9	180510	1902	heat shock protein family A (Hsp70) member 9	gene	["biological_process-&-1&-GO:0006457-&&-protein folding-%%-GO:0006611-&&-protein export from nucleus-%%-GO:0043066-&&-negative regulation of apoptotic process-%%-GO:0030218-&&-erythrocyte differentiation-%%-GO:0045647-&&-negative regulation of erythrocyte differentiation-%%-GO:1902037-&&-negative regulation of hematopoietic stem cell differentiation","cellular_component-&-1&-GO:0005739-&&-mitocho…	["KEGG-&-1&-hsa03018-&&-RNA degradation-%%-hsa05152-&&-Tuberculosis"]	HSPA9	Homo sapiens (Human)-&&-9606	taxon:9606	["Gene Symbol-&-1&-HSPA9"]	[""]	FALSE	75	138.324	75
SMAP2	SMAP2	G:9606:SMAP2	168223	1902	small ArfGAP2	gene	["biological_process-&-1&-GO:0043547-&&-positive regulation of GTPase activity","cellular_component-&-1&-GO:0005737-&&-cytoplasm","molecular_function-&-1&-GO:0005515-&&-protein binding-%%-GO:0005096-&&-GTPase activator activity-%%-GO:0046872-&&-metal ion binding"]	["KEGG-&-1&-hsa04144-&&-Endocytosis"]	SMAP2	Homo sapiens (Human)-&&-9606	taxon:9606	["Gene Symbol-&-1&-SMAP2"]	[""]	FALSE	5	5
HSPA8	HSPA8	G:9606:HSPA8	180511	1902	heat shock protein family A (Hsp70) member 8	gene	["biological_process-&-1&-GO:0000398-&&-mRNA splicing, via spliceosome-%%-GO:0051726-&&-regulation of cell cycle-%%-GO:0006457-&&-protein folding-%%-GO:0006986-&&-response to unfolded protein-%%-GO:0042026-&&-protein refolding-%%-GO:0006351-&&-transcription, DNA-templated-%%-GO:0006479-&&-protein methylation-%%-GO:0007269-&&-neurotransmitter secretion-%%-GO:0009267-&&-cellular response to starvat…	["KEGG-&-1&-hsa04213-&&-Longevity regulating pathway - multiple species-%%-hsa04612-&&-Antigen processing and presentation-%%-hsa04144-&&-Endocytosis-%%-hsa04141-&&-Protein processing in endoplasmic reticulum-%%-hsa03040-&&-Spliceosome-%%-hsa05134-&&-Legionellosis-%%-hsa05145-&&-Toxoplasmosis-%%-hsa04010-&&-MAPK signaling pathway-%%-hsa05164-&&-Influenza A-%%-hsa05162-&&-Measles-%%-hsa04915-&&-Es…	HSPA8	Homo sapiens (Human)-&&-9606	taxon:9606	["Gene Symbol-&-1&-HSPA8"]	[""]	FALSE	133	372.076	133
HSPB1	HSPB1	G:9606:HSPB1	180508	1902	heat shock protein family B (small) member 1	gene	["biological_process-&-1&-GO:0001895-&&-retina homeostasis-%%-GO:0001932-&&-regulation of protein phosphorylation-%%-GO:0006986-&&-response to unfolded protein-%%-GO:0009615-&&-response to virus-%%-GO:0035556-&&-intracellular signal transduction-%%-GO:0006446-&&-regulation of translational initiation-%%-GO:0006469-&&-negative regulation of protein kinase activity-%%-GO:0006928-&&-movement of cell…	["KEGG-&-1&-hsa05146-&&-Amoebiasis-%%-hsa04010-&&-MAPK signaling pathway-%%-hsa04370-&&-VEGF signaling pathway"]	HSPB1	Homo sapiens (Human)-&&-9606	taxon:9606	["Gene Symbol-&-1&-HSPB1"]	[""]	FALSE	100	84.8617	100
HSPA5	HSPA5	G:9606:HSPA5	180514	1902	heat shock protein family A (Hsp70) member 5	gene	["biological_process-&-1&-GO:0006983-&&-ER overload response-%%-GO:0006987-&&-activation of signaling protein activity involved in unfolded protein response-%%-GO:0043066-&&-negative regulation of apoptotic process-%%-GO:0009314-&&-response to radiation-%%-GO:0010976-&&-positive regulation of neuron projection development-%%-GO:0021589-&&-cerebellum structural organization-%%-GO:0021680-&&-cerebe…	["KEGG-&-1&-hsa04612-&&-Antigen processing and presentation-%%-hsa03060-&&-Protein export-%%-hsa05020-&&-Prion diseases-%%-hsa04141-&&-Protein processing in endoplasmic reticulum-%%-hsa04918-&&-Thyroid hormone synthesis"]	HSPA5	Homo sapiens (Human)-&&-9606	taxon:9606	["Gene Symbol-&-1&-HSPA5"]	[""]	FALSE	156	478.783	156
HSPA4	HSPA4	G:9606:HSPA4	180515	1902	heat shock protein family A (Hsp70) member 4	gene	["biological_process-&-1&-GO:0006986-&&-response to unfolded protein-%%-GO:0051131-&&-chaperone-mediated protein complex assembly-%%-GO:0045040-&&-protein import into mitochondrial outer membrane","cellular_component-&-1&-GO:0005829-&&-cytosol-%%-GO:0070062-&&-extracellular exosome","molecular_function-&-1&-GO:0005515-&&-protein binding-%%-GO:0005524-&&-ATP binding"]	["KEGG-&-1&-hsa04612-&&-Antigen processing and presentation-%%-hsa04530-&&-Tight junction"]	HSPA4	Homo sapiens (Human)-&&-9606	taxon:9606	["Gene Symbol-&-1&-HSPA4"]	[""]	FALSE	100	188.898	100
HSPA1B	HSPA1B	G:9606:HSPA1B	180518	1902	heat shock protein family A (Hsp70) member 1B	gene	["biological_process-&-1&-GO:0042026-&&-protein refolding-%%-GO:0010628-&&-positive regulation of gene expression-%%-GO:0010941-&&-regulation of cell death-%%-GO:0050821-&&-protein stabilization-%%-GO:0046718-&&-viral entry into host cell-%%-GO:0031396-&&-regulation of protein ubiquitination-%%-GO:0031397-&&-negative regulation of protein ubiquitination-%%-GO:0032757-&&-positive regulation of int…	["KEGG-&-1&-hsa04213-&&-Longevity regulating pathway - multiple species-%%-hsa04612-&&-Antigen processing and presentation-%%-hsa04144-&&-Endocytosis-%%-hsa03040-&&-Spliceosome-%%-hsa04141-&&-Protein processing in endoplasmic reticulum-%%-hsa05134-&&-Legionellosis-%%-hsa05145-&&-Toxoplasmosis-%%-hsa04010-&&-MAPK signaling pathway-%%-hsa05164-&&-Influenza A-%%-hsa04915-&&-Estrogen signaling pathwa…	HSPA1B	Homo sapiens (Human)-&&-9606	taxon:9606	["Gene Symbol-&-1&-HSPA1B"]	[""]	FALSE	77	93.4519	77
PDIA2	PDIA2	G:9606:PDIA2	168231	1902	protein disulfide isomerase family A member 2	gene	["biological_process-&-1&-GO:0006457-&&-protein folding-%%-GO:0055114-&&-oxidation-reduction process-%%-GO:0045454-&&-cell redox homeostasis-%%-GO:0006621-&&-protein retention in ER lumen-%%-GO:0019511-&&-peptidyl-proline hydroxylation-%%-GO:0034975-&&-protein folding in endoplasmic reticulum-%%-GO:0034976-&&-response to endoplasmic reticulum stress-%%-GO:1902175-&&-regulation of oxidative stress…	[""]	PDIA2	Homo sapiens (Human)-&&-9606	taxon:9606	["Gene Symbol-&-1&-PDIA2"]	[""]	FALSE	14	14
HSPA1A	HSPA1A	G:9606:HSPA1A	180519	1902	heat shock protein family A (Hsp70) member 1A	gene	["biological_process-&-1&-GO:0042026-&&-protein refolding-%%-GO:0010628-&&-positive regulation of gene expression-%%-GO:0010941-&&-regulation of cell death-%%-GO:0050821-&&-protein stabilization-%%-GO:0046718-&&-viral entry into host cell-%%-GO:0030512-&&-negative regulation of transforming growth factor beta receptor signaling pathway-%%-GO:0031396-&&-regulation of protein ubiquitination-%%-GO:0…	["KEGG-&-1&-hsa04213-&&-Longevity regulating pathway - multiple species-%%-hsa04612-&&-Antigen processing and presentation-%%-hsa05020-&&-Prion diseases-%%-hsa04144-&&-Endocytosis-%%-hsa04141-&&-Protein processing in endoplasmic reticulum-%%-hsa03040-&&-Spliceosome-%%-hsa05134-&&-Legionellosis-%%-hsa05145-&&-Toxoplasmosis-%%-hsa04010-&&-MAPK signaling pathway-%%-hsa05164-&&-Influenza A-%%-hsa0516…	HSPA1A	Homo sapiens (Human)-&&-9606	taxon:9606	["Gene Symbol-&-1&-HSPA1A"]	[""]	FALSE	77	93.4519	77
COPA	COPA	G:9606:COPA	182574	1902	coatomer protein complex subunit alpha	gene	["biological_process-&-1&-GO:0006886-&&-intracellular protein transport-%%-GO:0006888-&&-ER to Golgi vesicle-mediated transport-%%-GO:0006890-&&-retrograde vesicle-mediated transport, Golgi to ER-%%-GO:0006891-&&-intra-Golgi vesicle-mediated transport-%%-GO:0030157-&&-pancreatic juice secretion","cellular_component-&-1&-GO:0000139-&&-Golgi membrane-%%-GO:0016020-&&-membrane-%%-GO:0005829-&&-cytos…	[""]	COPA	Homo sapiens (Human)-&&-9606	taxon:9606	["Gene Symbol-&-1&-COPA"]	[""]	FALSE	22	22
PCNA	PCNA	G:9606:PCNA	178478	1902	proliferating cell nuclear antigen	gene	["biological_process-&-1&-GO:0000082-&&-G1/S transition of mitotic cell cycle-%%-GO:0000083-&&-regulation of transcription involved in G1/S transition of mitotic cell cycle-%%-GO:0000722-&&-telomere maintenance via recombination-%%-GO:0000723-&&-telomere maintenance-%%-GO:0006266-&&-DNA ligation-%%-GO:0006283-&&-transcription-coupled nucleotide-excision repair-%%-GO:0006296-&&-nucleotide-excision…	["KEGG-&-1&-hsa04110-&&-Cell cycle-%%-hsa03430-&&-Mismatch repair-%%-hsa03420-&&-Nucleotide excision repair-%%-hsa05161-&&-Hepatitis B-%%-hsa03410-&&-Base excision repair-%%-hsa04530-&&-Tight junction-%%-hsa03030-&&-DNA replication"]	PCNA	Homo sapiens (Human)-&&-9606	taxon:9606	["Gene Symbol-&-1&-PCNA"]	[""]	FALSE	87	78.6875	87
PCMT1	PCMT1	G:9606:PCMT1	178479	1902	protein-L-isoaspartate (D-aspartate) O-methyltransferase	gene	["biological_process-&-1&-GO:0006479-&&-protein methylation-%%-GO:0030091-&&-protein repair","cellular_component-&-1&-GO:0005829-&&-cytosol-%%-GO:0005737-&&-cytoplasm-%%-GO:0070062-&&-extracellular exosome-%%-GO:1903561-&&-extracellular vesicle","molecular_function-&-1&-GO:0005515-&&-protein binding-%%-GO:0004719-&&-protein-L-isoaspartate (D-aspartate) O-methyltransferase activity-%%-GO:0045296-&…	[""]	PCMT1	Homo sapiens (Human)-&&-9606	taxon:9606	["Gene Symbol-&-1&-PCMT1"]	[""]	FALSE	30	30
IGF2BP1	IGF2BP1	G:9606:IGF2BP1	174380	1902	insulin like growth factor 2 mRNA binding protein 1	gene	["biological_process-&-1&-GO:0010467-&&-gene expression-%%-GO:0010610-&&-regulation of mRNA stability involved in response to stress-%%-GO:0017148-&&-negative regulation of translation-%%-GO:0022013-&&-pallium cell proliferation in forebrain-%%-GO:0042035-&&-regulation of cytokine biosynthetic process-%%-GO:0051028-&&-mRNA transport-%%-GO:0070934-&&-CRD-mediated mRNA stabilization-%%-GO:0097150-&…	["KEGG-&-1&-hsa05206-&&-MicroRNAs in cancer"]	IGF2BP1	Homo sapiens (Human)-&&-9606	taxon:9606	["Gene Symbol-&-1&-IGF2BP1"]	[""]	FALSE	24	24
HSD17B4	HSD17B4	G:9606:HSD17B4	180525	1902	hydroxysteroid 17-beta dehydrogenase 4	gene	["biological_process-&-1&-GO:0000038-&&-very long-chain fatty acid metabolic process-%%-GO:0001649-&&-osteoblast differentiation-%%-GO:0006635-&&-fatty acid beta-oxidation-%%-GO:0006699-&&-bile acid biosynthetic process-%%-GO:0008209-&&-androgen metabolic process-%%-GO:0008210-&&-estrogen metabolic process-%%-GO:0033540-&&-fatty acid beta-oxidation using acyl-CoA oxidase-%%-GO:0036109-&&-alpha-li…	["KEGG-&-1&-hsa01212-&&-Fatty acid metabolism-%%-hsa00120-&&-Primary bile acid biosynthesis-%%-hsa01040-&&-Biosynthesis of unsaturated fatty acids-%%-hsa01100-&&-Metabolic pathways-%%-hsa04146-&&-Peroxisome"]	HSD17B4	Homo sapiens (Human)-&&-9606	taxon:9606	["Gene Symbol-&-1&-HSD17B4"]	[""]	FALSE	14	14
SERPINA5	SERPINA5	G:9606:SERPINA5	178483	1902	serpin family A member 5	gene	["biological_process-&-1&-GO:0007596-&&-blood coagulation-%%-GO:0006869-&&-lipid transport-%%-GO:0007283-&&-spermatogenesis-%%-GO:0007342-&&-fusion of sperm to egg plasma membrane-%%-GO:0010951-&&-negative regulation of endopeptidase activity-%%-GO:0051346-&&-negative regulation of hydrolase activity-%%-GO:0061107-&&-seminal vesicle development","cellular_component-&-1&-GO:0002080-&&-acrosomal me…	["KEGG-&-1&-hsa04610-&&-Complement and coagulation cascades"]	SERPINA5	Homo sapiens (Human)-&&-9606	taxon:9606	["Gene Symbol-&-1&-SERPINA5"]	[""]	FALSE	12	12
LAMA1	LAMA1	G:9606:LAMA1	162096	1902	laminin subunit alpha 1	gene	["biological_process-&-1&-GO:0007155-&&-cell adhesion-%%-GO:0007166-&&-cell surface receptor signaling pathway-%%-GO:0030155-&&-regulation of cell adhesion-%%-GO:0030198-&&-extracellular matrix organization-%%-GO:0030334-&&-regulation of cell migration-%%-GO:0045995-&&-regulation of embryonic development","cellular_component-&-1&-GO:0005576-&&-extracellular region-%%-GO:0005578-&&-proteinaceous e…	["KEGG-&-1&-hsa05146-&&-Amoebiasis-%%-hsa04510-&&-Focal adhesion-%%-hsa04151-&&-PI3K-Akt signaling pathway-%%-hsa04512-&&-ECM-receptor interaction-%%-hsa05145-&&-Toxoplasmosis-%%-hsa05165-&&-Human papillomavirus infection-%%-hsa05200-&&-Pathways in cancer-%%-hsa05222-&&-Small cell lung cancer"]	LAMA1	Homo sapiens (Human)-&&-9606	taxon:9606	["Gene Symbol-&-1&-LAMA1"]	[""]	FALSE	12	12
PRMT1	PRMT1	G:9606:PRMT1	180535	1902	protein arginine methyltransferase 1	gene	["biological_process-&-1&-GO:0006479-&&-protein methylation-%%-GO:0006977-&&-DNA damage response, signal transduction by p53 class mediator resulting in cell cycle arrest-%%-GO:0007166-&&-cell surface receptor signaling pathway-%%-GO:0016571-&&-histone methylation-%%-GO:0018216-&&-peptidyl-arginine methylation-%%-GO:0019919-&&-peptidyl-arginine methylation, to asymmetrical-dimethyl arginine-%%-GO…	["KEGG-&-1&-hsa04922-&&-Glucagon signaling pathway-%%-hsa04068-&&-FoxO signaling pathway"]	PRMT1	Homo sapiens (Human)-&&-9606	taxon:9606	["Gene Symbol-&-1&-PRMT1"]	[""]	FALSE	79	111.359	79
PCBP2	PCBP2	G:9606:PCBP2	178491	1902	poly(rC) binding protein 2	gene	["biological_process-&-1&-GO:0000398-&&-mRNA splicing, via spliceosome-%%-GO:0010467-&&-gene expression-%%-GO:0016071-&&-mRNA metabolic process-%%-GO:0032480-&&-negative regulation of type I interferon production-%%-GO:0039694-&&-viral RNA genome replication-%%-GO:0043161-&&-proteasome-mediated ubiquitin-dependent protein catabolic process-%%-GO:0045087-&&-innate immune response-%%-GO:0050687-&&-…	["KEGG-&-1&-hsa04216-&&-Ferroptosis"]	PCBP2	Homo sapiens (Human)-&&-9606	taxon:9606	["Gene Symbol-&-1&-PCBP2"]	[""]	FALSE	50	50
PC	PC	G:9606:PC	178494	1902	pyruvate carboxylase	gene	["biological_process-&-1&-GO:0006090-&&-pyruvate metabolic process-%%-GO:0006094-&&-gluconeogenesis-%%-GO:0006629-&&-lipid metabolic process-%%-GO:0006768-&&-biotin metabolic process-%%-GO:0010629-&&-negative regulation of gene expression-%%-GO:0019074-&&-viral RNA genome packaging-%%-GO:0044791-&&-positive regulation by host of viral release from host cell-%%-GO:0044794-&&-positive regulation by…	["KEGG-&-1&-hsa01230-&&-Biosynthesis of amino acids-%%-hsa00620-&&-Pyruvate metabolism-%%-hsa00020-&&-Citrate cycle (TCA cycle)-%%-hsa01200-&&-Carbon metabolism-%%-hsa01100-&&-Metabolic pathways"]	PC	Homo sapiens (Human)-&&-9606	taxon:9606	["Gene Symbol-&-1&-PC"]	[""]	FALSE	28	28
AGFG1	AGFG1	G:9606:AGFG1	180543	1902	ArfGAP with FG repeats 1	gene	["biological_process-&-1&-GO:0001675-&&-acrosome assembly-%%-GO:0006406-&&-mRNA export from nucleus-%%-GO:0007275-&&-multicellular organism development-%%-GO:0007289-&&-spermatid nucleus differentiation-%%-GO:0043547-&&-positive regulation of GTPase activity-%%-GO:0045109-&&-intermediate filament organization-%%-GO:0061024-&&-membrane organization","cellular_component-&-1&-GO:0005829-&&-cytosol-%…	["KEGG-&-1&-hsa05164-&&-Influenza A"]	AGFG1	Homo sapiens (Human)-&&-9606	taxon:9606	["Gene Symbol-&-1&-AGFG1"]	[""]	FALSE	7	7
COL7A1	COL7A1	G:9606:COL7A1	182591	1902	collagen type VII alpha 1 chain	gene	["biological_process-&-1&-GO:0007155-&&-cell adhesion-%%-GO:0006888-&&-ER to Golgi vesicle-mediated transport-%%-GO:0008544-&&-epidermis development-%%-GO:0010951-&&-negative regulation of endopeptidase activity-%%-GO:0030198-&&-extracellular matrix organization-%%-GO:0030574-&&-collagen catabolic process-%%-GO:0035987-&&-endodermal cell differentiation-%%-GO:0048208-&&-COPII vesicle coating","ce…	["KEGG-&-1&-hsa04974-&&-Protein digestion and absorption"]	COL7A1	Homo sapiens (Human)-&&-9606	taxon:9606	["Gene Symbol-&-1&-COL7A1"]	[""]	FALSE	8	8
PCBP1	PCBP1	G:9606:PCBP1	178492	1902	poly(rC) binding protein 1	gene	["biological_process-&-1&-GO:0000398-&&-mRNA splicing, via spliceosome-%%-GO:0010467-&&-gene expression-%%-GO:0039694-&&-viral RNA genome replication-%%-GO:0045944-&&-positive regulation of transcription from RNA polymerase II promoter","cellular_component-&-1&-GO:0000932-&&-P-body-%%-GO:0016020-&&-membrane-%%-GO:0005829-&&-cytosol-%%-GO:0005737-&&-cytoplasm-%%-GO:0005654-&&-nucleoplasm-%%-GO:001…	["KEGG-&-1&-hsa04216-&&-Ferroptosis-%%-hsa03040-&&-Spliceosome"]	PCBP1	Homo sapiens (Human)-&&-9606	taxon:9606	["Gene Symbol-&-1&-PCBP1"]	[""]	FALSE	67	34.8757	67
HRH1	HRH1	G:9606:HRH1	180541	1902	histamine receptor H1	gene	["biological_process-&-1&-GO:0006954-&&-inflammatory response-%%-GO:0007186-&&-G-protein coupled receptor signaling pathway-%%-GO:0007200-&&-phospholipase C-activating G-protein coupled receptor signaling pathway-%%-GO:0007613-&&-memory-%%-GO:0008542-&&-visual learning-%%-GO:0019229-&&-regulation of vasoconstriction-%%-GO:0048016-&&-inositol phosphate-mediated signaling-%%-GO:0032962-&&-positive …	["KEGG-&-1&-hsa04020-&&-Calcium signaling pathway-%%-hsa04750-&&-Inflammatory mediator regulation of TRP channels-%%-hsa04080-&&-Neuroactive ligand-receptor interaction"]	HRH1	Homo sapiens (Human)-&&-9606	taxon:9606	["Gene Symbol-&-1&-HRH1"]	[""]	FALSE	2	2
COL6A3	COL6A3	G:9606:COL6A3	182592	1902	collagen type VI alpha 3 chain	gene	["biological_process-&-1&-GO:0007155-&&-cell adhesion-%%-GO:0007517-&&-muscle organ development-%%-GO:0010951-&&-negative regulation of endopeptidase activity-%%-GO:0030198-&&-extracellular matrix organization-%%-GO:0030574-&&-collagen catabolic process","cellular_component-&-1&-GO:0005576-&&-extracellular region-%%-GO:0005578-&&-proteinaceous extracellular matrix-%%-GO:0005589-&&-collagen type V…	["KEGG-&-1&-hsa04510-&&-Focal adhesion-%%-hsa04512-&&-ECM-receptor interaction-%%-hsa04151-&&-PI3K-Akt signaling pathway-%%-hsa05165-&&-Human papillomavirus infection-%%-hsa04974-&&-Protein digestion and absorption"]	COL6A3	Homo sapiens (Human)-&&-9606	taxon:9606	["Gene Symbol-&-1&-COL6A3"]	[""]	FALSE	3	3
PTRF	PTRF	G:9606:PTRF	162112	1902	polymerase I and transcript release factor	gene	["biological_process-&-1&-GO:0006363-&&-termination of RNA polymerase I transcription-%%-GO:0006355-&&-regulation of transcription, DNA-templated-%%-GO:0006361-&&-transcription initiation from RNA polymerase I promoter","cellular_component-&-1&-GO:0005886-&&-plasma membrane-%%-GO:0005739-&&-mitochondrion-%%-GO:0005829-&&-cytosol-%%-GO:0005783-&&-endoplasmic reticulum-%%-GO:0005634-&&-nucleus-%%-G…	[""]	PTRF	Homo sapiens (Human)-&&-9606	taxon:9606	["Gene Symbol-&-1&-PTRF"]	[""]	FALSE	25	25
HIST2H2BF	HIST2H2BF	G:9606:HIST2H2BF	158017	1902	histone cluster 2 H2B family member f	gene	["biological_process-&-1&-GO:0006334-&&-nucleosome assembly","cellular_component-&-1&-GO:0000786-&&-nucleosome-%%-GO:0005829-&&-cytosol-%%-GO:0005634-&&-nucleus-%%-GO:0005654-&&-nucleoplasm-%%-GO:0070062-&&-extracellular exosome","molecular_function-&-1&-GO:0003674-&&-molecular_function-%%-GO:0003677-&&-DNA binding-%%-GO:0046982-&&-protein heterodimerization activity"]	["KEGG-&-1&-hsa05322-&&-Systemic lupus erythematosus-%%-hsa05034-&&-Alcoholism-%%-hsa05203-&&-Viral carcinogenesis"]	HIST2H2BF	Homo sapiens (Human)-&&-9606	taxon:9606	["Gene Symbol-&-1&-HIST2H2BF"]	[""]	FALSE	7	7
NSUN2	NSUN2	G:9606:NSUN2	170305	1902	NOP2/Sun RNA methyltransferase family member 2	gene	["biological_process-&-1&-GO:0006400-&&-tRNA modification-%%-GO:0007067-&&-mitotic nuclear division-%%-GO:0007286-&&-spermatid development-%%-GO:0030488-&&-tRNA methylation-%%-GO:0033313-&&-meiotic cell cycle checkpoint-%%-GO:0048820-&&-hair follicle maturation-%%-GO:0051301-&&-cell division","cellular_component-&-1&-GO:0005737-&&-cytoplasm-%%-GO:0005654-&&-nucleoplasm-%%-GO:0005730-&&-nucleolus-…	[""]	NSUN2	Homo sapiens (Human)-&&-9606	taxon:9606	["Gene Symbol-&-1&-NSUN2"]	[""]	FALSE	20	20
HRAS	HRAS	G:9606:HRAS	180545	1902	HRas proto-oncogene, GTPase	gene	["biological_process-&-1&-GO:0000165-&&-MAPK cascade-%%-GO:0001934-&&-positive regulation of protein phosphorylation-%%-GO:0002223-&&-stimulatory C-type lectin receptor signaling pathway-%%-GO:0007165-&&-signal transduction-%%-GO:0006897-&&-endocytosis-%%-GO:0006935-&&-chemotaxis-%%-GO:0007050-&&-cell cycle arrest-%%-GO:0007093-&&-mitotic cell cycle checkpoint-%%-GO:0007166-&&-cell surface recept…	["KEGG-&-1&-hsa04062-&&-Chemokine signaling pathway-%%-hsa04810-&&-Regulation of actin cytoskeleton-%%-hsa04072-&&-Phospholipase D signaling pathway-%%-hsa04916-&&-Melanogenesis-%%-hsa04144-&&-Endocytosis-%%-hsa04068-&&-FoxO signaling pathway-%%-hsa01522-&&-Endocrine resistance-%%-hsa01521-&&-EGFR tyrosine kinase inhibitor resistance-%%-hsa04933-&&-AGE-RAGE signaling pathway in diabetic complicat…	HRAS	Homo sapiens (Human)-&&-9606	taxon:9606	["Gene Symbol-&-1&-HRAS"]	[""]	FALSE	26	26
COL4A5	COL4A5	G:9606:COL4A5	182598	1902	collagen type IV alpha 5 chain	gene	["biological_process-&-1&-GO:0007528-&&-neuromuscular junction development-%%-GO:0030198-&&-extracellular matrix organization-%%-GO:0030574-&&-collagen catabolic process-%%-GO:0038063-&&-collagen-activated tyrosine kinase receptor signaling pathway","cellular_component-&-1&-GO:0005576-&&-extracellular region-%%-GO:0005587-&&-collagen type IV trimer-%%-GO:0005605-&&-basal lamina-%%-GO:0005788-&&-e…	["KEGG-&-1&-hsa04510-&&-Focal adhesion-%%-hsa05146-&&-Amoebiasis-%%-hsa04512-&&-ECM-receptor interaction-%%-hsa04151-&&-PI3K-Akt signaling pathway-%%-hsa04933-&&-AGE-RAGE signaling pathway in diabetic complications-%%-hsa05165-&&-Human papillomavirus infection-%%-hsa04926-&&-Relaxin signaling pathway-%%-hsa05200-&&-Pathways in cancer-%%-hsa05222-&&-Small cell lung cancer-%%-hsa04974-&&-Protein di…	COL4A5	Homo sapiens (Human)-&&-9606	taxon:9606	["Gene Symbol-&-1&-COL4A5"]	[""]	FALSE	6	6
COL4A4	COL4A4	G:9606:COL4A4	182599	1902	collagen type IV alpha 4 chain	gene	["biological_process-&-1&-GO:0030198-&&-extracellular matrix organization-%%-GO:0030574-&&-collagen catabolic process-%%-GO:0032836-&&-glomerular basement membrane development","cellular_component-&-1&-GO:0005576-&&-extracellular region-%%-GO:0005587-&&-collagen type IV trimer-%%-GO:0005605-&&-basal lamina-%%-GO:0005788-&&-endoplasmic reticulum lumen","molecular_function-&-1&-GO:0005201-&&-extrac…	["KEGG-&-1&-hsa05146-&&-Amoebiasis-%%-hsa04510-&&-Focal adhesion-%%-hsa04512-&&-ECM-receptor interaction-%%-hsa04933-&&-AGE-RAGE signaling pathway in diabetic complications-%%-hsa04151-&&-PI3K-Akt signaling pathway-%%-hsa05165-&&-Human papillomavirus infection-%%-hsa04926-&&-Relaxin signaling pathway-%%-hsa05200-&&-Pathways in cancer-%%-hsa05222-&&-Small cell lung cancer-%%-hsa04974-&&-Protein di…	COL4A4	Homo sapiens (Human)-&&-9606	taxon:9606	["Gene Symbol-&-1&-COL4A4"]	[""]	FALSE	4	4
COL4A6	COL4A6	G:9606:COL4A6	182597	1902	collagen type IV alpha 6 chain	gene	["biological_process-&-1&-GO:0007155-&&-cell adhesion-%%-GO:0030198-&&-extracellular matrix organization-%%-GO:0030574-&&-collagen catabolic process","cellular_component-&-1&-GO:0005576-&&-extracellular region-%%-GO:0005587-&&-collagen type IV trimer-%%-GO:0005788-&&-endoplasmic reticulum lumen","molecular_function-&-1&-GO:0005201-&&-extracellular matrix structural constituent"]	["KEGG-&-1&-hsa04510-&&-Focal adhesion-%%-hsa05146-&&-Amoebiasis-%%-hsa04933-&&-AGE-RAGE signaling pathway in diabetic complications-%%-hsa04512-&&-ECM-receptor interaction-%%-hsa04151-&&-PI3K-Akt signaling pathway-%%-hsa05165-&&-Human papillomavirus infection-%%-hsa04926-&&-Relaxin signaling pathway-%%-hsa05200-&&-Pathways in cancer-%%-hsa04974-&&-Protein digestion and absorption-%%-hsa05222-&&-…	COL4A6	Homo sapiens (Human)-&&-9606	taxon:9606	["Gene Symbol-&-1&-COL4A6"]	[""]	FALSE	6	6
NCOA4	NCOA4	G:9606:NCOA4	176459	1902	nuclear receptor coactivator 4	gene	["biological_process-&-1&-GO:0006351-&&-transcription, DNA-templated-%%-GO:0006622-&&-protein targeting to lysosome-%%-GO:0008584-&&-male gonad development-%%-GO:0045893-&&-positive regulation of transcription, DNA-templated-%%-GO:0030521-&&-androgen receptor signaling pathway","cellular_component-&-1&-GO:0005634-&&-nucleus-%%-GO:0044754-&&-autolysosome","molecular_function-&-1&-GO:0003713-&&-tra…	["KEGG-&-1&-hsa05216-&&-Thyroid cancer-%%-hsa04216-&&-Ferroptosis-%%-hsa05200-&&-Pathways in cancer"]	NCOA4	Homo sapiens (Human)-&&-9606	taxon:9606	["Gene Symbol-&-1&-NCOA4"]	[""]	FALSE	10	10
COL4A1	COL4A1	G:9606:COL4A1	182603	1902	collagen type IV alpha 1 chain	gene	["biological_process-&-1&-GO:0001569-&&-branching involved in blood vessel morphogenesis-%%-GO:0007420-&&-brain development-%%-GO:0007528-&&-neuromuscular junction development-%%-GO:0071230-&&-cellular response to amino acid stimulus-%%-GO:0030198-&&-extracellular matrix organization-%%-GO:0030574-&&-collagen catabolic process-%%-GO:0030855-&&-epithelial cell differentiation-%%-GO:0038063-&&-coll…	["KEGG-&-1&-hsa05146-&&-Amoebiasis-%%-hsa04510-&&-Focal adhesion-%%-hsa04933-&&-AGE-RAGE signaling pathway in diabetic complications-%%-hsa04512-&&-ECM-receptor interaction-%%-hsa04151-&&-PI3K-Akt signaling pathway-%%-hsa05165-&&-Human papillomavirus infection-%%-hsa04926-&&-Relaxin signaling pathway-%%-hsa05200-&&-Pathways in cancer-%%-hsa05222-&&-Small cell lung cancer-%%-hsa04974-&&-Protein di…	COL4A1	Homo sapiens (Human)-&&-9606	taxon:9606	["Gene Symbol-&-1&-COL4A1"]	[""]	FALSE	10	10
COL4A3	COL4A3	G:9606:COL4A3	182600	1902	collagen type IV alpha 3 chain	gene	["biological_process-&-1&-GO:0007155-&&-cell adhesion-%%-GO:0006919-&&-activation of cysteine-type endopeptidase activity involved in apoptotic process-%%-GO:0007166-&&-cell surface receptor signaling pathway-%%-GO:0007605-&&-sensory perception of sound-%%-GO:0008015-&&-blood circulation-%%-GO:0008283-&&-cell proliferation-%%-GO:0008285-&&-negative regulation of cell proliferation-%%-GO:0010951-&…	["KEGG-&-1&-hsa05146-&&-Amoebiasis-%%-hsa04510-&&-Focal adhesion-%%-hsa04151-&&-PI3K-Akt signaling pathway-%%-hsa04512-&&-ECM-receptor interaction-%%-hsa04933-&&-AGE-RAGE signaling pathway in diabetic complications-%%-hsa05165-&&-Human papillomavirus infection-%%-hsa04926-&&-Relaxin signaling pathway-%%-hsa05200-&&-Pathways in cancer-%%-hsa04974-&&-Protein digestion and absorption-%%-hsa05222-&&-…	COL4A3	Homo sapiens (Human)-&&-9606	taxon:9606	["Gene Symbol-&-1&-COL4A3"]	[""]	FALSE	6	6
COL4A2	COL4A2	G:9606:COL4A2	182601	1902	collagen type IV alpha 2 chain	gene	["biological_process-&-1&-GO:0001525-&&-angiogenesis-%%-GO:0006351-&&-transcription, DNA-templated-%%-GO:0016525-&&-negative regulation of angiogenesis-%%-GO:0030198-&&-extracellular matrix organization-%%-GO:0030574-&&-collagen catabolic process-%%-GO:0035987-&&-endodermal cell differentiation-%%-GO:0038063-&&-collagen-activated tyrosine kinase receptor signaling pathway-%%-GO:0071560-&&-cellula…	["KEGG-&-1&-hsa04510-&&-Focal adhesion-%%-hsa05146-&&-Amoebiasis-%%-hsa04151-&&-PI3K-Akt signaling pathway-%%-hsa04933-&&-AGE-RAGE signaling pathway in diabetic complications-%%-hsa04512-&&-ECM-receptor interaction-%%-hsa05165-&&-Human papillomavirus infection-%%-hsa04926-&&-Relaxin signaling pathway-%%-hsa05200-&&-Pathways in cancer-%%-hsa05222-&&-Small cell lung cancer-%%-hsa04974-&&-Protein di…	COL4A2	Homo sapiens (Human)-&&-9606	taxon:9606	["Gene Symbol-&-1&-COL4A2"]	[""]	FALSE	10	10
COL1A2	COL1A2	G:9606:COL1A2	182607	1902	collagen type I alpha 2 chain	gene	["biological_process-&-1&-GO:0001501-&&-skeletal system development-%%-GO:0001568-&&-blood vessel development-%%-GO:0007596-&&-blood coagulation-%%-GO:0007179-&&-transforming growth factor beta receptor signaling pathway-%%-GO:0007266-&&-Rho protein signal transduction-%%-GO:0008217-&&-regulation of blood pressure-%%-GO:0071230-&&-cellular response to amino acid stimulus-%%-GO:0030168-&&-platelet…	["KEGG-&-1&-hsa04611-&&-Platelet activation-%%-hsa05146-&&-Amoebiasis-%%-hsa04510-&&-Focal adhesion-%%-hsa04933-&&-AGE-RAGE signaling pathway in diabetic complications-%%-hsa04151-&&-PI3K-Akt signaling pathway-%%-hsa04512-&&-ECM-receptor interaction-%%-hsa05165-&&-Human papillomavirus infection-%%-hsa04926-&&-Relaxin signaling pathway-%%-hsa04974-&&-Protein digestion and absorption"]	COL1A2	Homo sapiens (Human)-&&-9606	taxon:9606	["Gene Symbol-&-1&-COL1A2"]	[""]	FALSE	11	11
HPR	HPR	G:9606:HPR	180556	1902	haptoglobin-related protein	gene	["biological_process-&-1&-GO:0006898-&&-receptor-mediated endocytosis","cellular_component-&-1&-GO:0005576-&&-extracellular region-%%-GO:0034366-&&-spherical high-density lipoprotein particle-%%-GO:0070062-&&-extracellular exosome-%%-GO:0072562-&&-blood microparticle","molecular_function-&-1&-GO:0030492-&&-hemoglobin binding"]	["KEGG-&-1&-hsa05143-&&-African trypanosomiasis"]	HPR	Homo sapiens (Human)-&&-9606	taxon:9606	["Gene Symbol-&-1&-HPR"]	[""]	FALSE	2	2
HPN	HPN	G:9606:HPN	180557	1902	hepsin	gene	["biological_process-&-1&-GO:0006508-&&-proteolysis-%%-GO:0043066-&&-negative regulation of apoptotic process-%%-GO:0008360-&&-regulation of cell shape-%%-GO:0010628-&&-positive regulation of gene expression-%%-GO:0010719-&&-negative regulation of epithelial to mesenchymal transition-%%-GO:0010756-&&-positive regulation of plasminogen activation-%%-GO:0030307-&&-positive regulation of cell growth…	["KEGG-&-1&-hsa05203-&&-Viral carcinogenesis"]	HPN	Homo sapiens (Human)-&&-9606	taxon:9606	["Gene Symbol-&-1&-HPN"]	[""]	FALSE	1	1
COL2A1	COL2A1	G:9606:COL2A1	182605	1902	collagen type II alpha 1 chain	gene	["biological_process-&-1&-GO:0001501-&&-skeletal system development-%%-GO:0001502-&&-cartilage condensation-%%-GO:0006029-&&-proteoglycan metabolic process-%%-GO:0001894-&&-tissue homeostasis-%%-GO:0001958-&&-endochondral ossification-%%-GO:0002062-&&-chondrocyte differentiation-%%-GO:0003007-&&-heart morphogenesis-%%-GO:0007417-&&-central nervous system development-%%-GO:0007601-&&-visual percep…	["KEGG-&-1&-hsa04510-&&-Focal adhesion-%%-hsa04512-&&-ECM-receptor interaction-%%-hsa04151-&&-PI3K-Akt signaling pathway-%%-hsa05165-&&-Human papillomavirus infection-%%-hsa04974-&&-Protein digestion and absorption"]	COL2A1	Homo sapiens (Human)-&&-9606	taxon:9606	["Gene Symbol-&-1&-COL2A1"]	[""]	FALSE	8	8
COL1A1	COL1A1	G:9606:COL1A1	182608	1902	collagen type I alpha 1 chain	gene	["biological_process-&-1&-GO:0001501-&&-skeletal system development-%%-GO:0001568-&&-blood vessel development-%%-GO:0001649-&&-osteoblast differentiation-%%-GO:0001957-&&-intramembranous ossification-%%-GO:0001958-&&-endochondral ossification-%%-GO:0007596-&&-blood coagulation-%%-GO:0007601-&&-visual perception-%%-GO:0007605-&&-sensory perception of sound-%%-GO:0042493-&&-response to drug-%%-GO:0…	["KEGG-&-1&-hsa04611-&&-Platelet activation-%%-hsa04510-&&-Focal adhesion-%%-hsa05146-&&-Amoebiasis-%%-hsa04933-&&-AGE-RAGE signaling pathway in diabetic complications-%%-hsa04151-&&-PI3K-Akt signaling pathway-%%-hsa04512-&&-ECM-receptor interaction-%%-hsa05165-&&-Human papillomavirus infection-%%-hsa04926-&&-Relaxin signaling pathway-%%-hsa04974-&&-Protein digestion and absorption"]	COL1A1	Homo sapiens (Human)-&&-9606	taxon:9606	["Gene Symbol-&-1&-COL1A1"]	[""]	FALSE	16	16
PRPF8	PRPF8	G:9606:PRPF8	174423	1902	pre-mRNA processing factor 8	gene	["biological_process-&-1&-GO:0000244-&&-spliceosomal tri-snRNP complex assembly-%%-GO:0000375-&&-RNA splicing, via transesterification reactions-%%-GO:0000398-&&-mRNA splicing, via spliceosome-%%-GO:0006397-&&-mRNA processing-%%-GO:0008380-&&-RNA splicing-%%-GO:0071222-&&-cellular response to lipopolysaccharide-%%-GO:0071356-&&-cellular response to tumor necrosis factor","cellular_component-&-1&-…	["KEGG-&-1&-hsa03040-&&-Spliceosome"]	PRPF8	Homo sapiens (Human)-&&-9606	taxon:9606	["Gene Symbol-&-1&-PRPF8"]	[""]	FALSE	54	54
BRD3	BRD3	G:9606:BRD3	176469	1902	bromodomain containing 3	gene	["biological_process-&-1&-GO:0006351-&&-transcription, DNA-templated-%%-GO:0006357-&&-regulation of transcription from RNA polymerase II promoter-%%-GO:0016569-&&-covalent chromatin modification","cellular_component-&-1&-GO:0005634-&&-nucleus","molecular_function-&-1&-GO:0005515-&&-protein binding-%%-GO:0003682-&&-chromatin binding-%%-GO:0070577-&&-lysine-acetylated histone binding"]	[""]	BRD3	Homo sapiens (Human)-&&-9606	taxon:9606	["Gene Symbol-&-1&-BRD3"]	[""]	FALSE	23	23
SERPINE1	SERPINE1	G:9606:SERPINE1	178522	1902	serpin family E member 1	gene	["biological_process-&-1&-GO:0001300-&&-chronological cell aging-%%-GO:0001525-&&-angiogenesis-%%-GO:0002576-&&-platelet degranulation-%%-GO:0007623-&&-circadian rhythm-%%-GO:0050829-&&-defense response to Gram-negative bacterium-%%-GO:0010469-&&-regulation of receptor activity-%%-GO:0010757-&&-negative regulation of plasminogen activation-%%-GO:0010951-&&-negative regulation of endopeptidase act…	["KEGG-&-1&-hsa04115-&&-p53 signaling pathway-%%-hsa04933-&&-AGE-RAGE signaling pathway in diabetic complications-%%-hsa04218-&&-Cellular senescence-%%-hsa04610-&&-Complement and coagulation cascades-%%-hsa05142-&&-Chagas disease (American trypanosomiasis)-%%-hsa04390-&&-Hippo signaling pathway-%%-hsa04066-&&-HIF-1 signaling pathway-%%-hsa04371-&&-Apelin signaling pathway"]	SERPINE1	Homo sapiens (Human)-&&-9606	taxon:9606	["Gene Symbol-&-1&-SERPINE1"]	["SERPINE1"]	TRUE	22	22
CNN1	CNN1	G:9606:CNN1	182618	1902	calponin 1	gene	["biological_process-&-1&-GO:0006940-&&-regulation of smooth muscle contraction-%%-GO:0031032-&&-actomyosin structure organization-%%-GO:1904706-&&-negative regulation of vascular smooth muscle cell proliferation","cellular_component-&-1&-GO:0005856-&&-cytoskeleton-%%-GO:0005925-&&-focal adhesion","molecular_function-&-1&-GO:0005515-&&-protein binding-%%-GO:0003779-&&-actin binding-%%-GO:0005516-…	[""]	CNN1	Homo sapiens (Human)-&&-9606	taxon:9606	["Gene Symbol-&-1&-CNN1"]	[""]	FALSE	5	5
PAFAH1B3	PAFAH1B3	G:9606:PAFAH1B3	178526	1902	platelet activating factor acetylhydrolase 1b catalytic subunit 3	gene	["biological_process-&-1&-GO:0006629-&&-lipid metabolic process-%%-GO:0007283-&&-spermatogenesis-%%-GO:0007399-&&-nervous system development-%%-GO:0007420-&&-brain development-%%-GO:0016042-&&-lipid catabolic process","cellular_component-&-1&-GO:0016020-&&-membrane-%%-GO:0005829-&&-cytosol-%%-GO:0005737-&&-cytoplasm-%%-GO:0070062-&&-extracellular exosome","molecular_function-&-1&-GO:0005515-&&-pr…	["KEGG-&-1&-hsa00565-&&-Ether lipid metabolism-%%-hsa01100-&&-Metabolic pathways"]	PAFAH1B3	Homo sapiens (Human)-&&-9606	taxon:9606	["Gene Symbol-&-1&-PAFAH1B3"]	[""]	FALSE	15	15
UBXN8	UBXN8	G:9606:UBXN8	176476	1902	UBX domain protein 8	gene	["biological_process-&-1&-GO:0007338-&&-single fertilization-%%-GO:0030433-&&-ER-associated ubiquitin-dependent protein catabolic process","cellular_component-&-1&-GO:0005783-&&-endoplasmic reticulum-%%-GO:0005730-&&-nucleolus-%%-GO:0030176-&&-integral component of endoplasmic reticulum membrane","molecular_function-&-1&-GO:0005515-&&-protein binding"]	[""]	UBXN8	Homo sapiens (Human)-&&-9606	taxon:9606	["Gene Symbol-&-1&-UBXN8"]	[""]	FALSE	7	7
PRDX1	PRDX1	G:9606:PRDX1	178524	1902	peroxiredoxin 1	gene	["biological_process-&-1&-GO:0000302-&&-response to reactive oxygen species-%%-GO:0001501-&&-skeletal system development-%%-GO:0001895-&&-retina homeostasis-%%-GO:0055114-&&-oxidation-reduction process-%%-GO:0045454-&&-cell redox homeostasis-%%-GO:0042267-&&-natural killer cell mediated cytotoxicity-%%-GO:0008283-&&-cell proliferation-%%-GO:0019430-&&-removal of superoxide radicals-%%-GO:0032872-…	["KEGG-&-1&-hsa04146-&&-Peroxisome"]	PRDX1	Homo sapiens (Human)-&&-9606	taxon:9606	["Gene Symbol-&-1&-PRDX1"]	[""]	FALSE	40	40
COMMD1	COMMD1	G:9606:COMMD1	164194	1902	copper metabolism domain containing 1	gene	["biological_process-&-1&-GO:0006351-&&-transcription, DNA-templated-%%-GO:0006893-&&-Golgi to plasma membrane transport-%%-GO:0015031-&&-protein transport-%%-GO:0031398-&&-positive regulation of protein ubiquitination-%%-GO:0032088-&&-negative regulation of NF-kappaB transcription factor activity-%%-GO:0032434-&&-regulation of proteasomal ubiquitin-dependent protein catabolic process-%%-GO:00482…	[""]	COMMD1	Homo sapiens (Human)-&&-9606	taxon:9606	["Gene Symbol-&-1&-COMMD1"]	[""]	FALSE	14	14
LAMC3	LAMC3	G:9606:LAMC3	174439	1902	laminin subunit gamma 3	gene	["biological_process-&-1&-GO:0000904-&&-cell morphogenesis involved in differentiation-%%-GO:0007155-&&-cell adhesion-%%-GO:0007601-&&-visual perception-%%-GO:0014002-&&-astrocyte development-%%-GO:0030198-&&-extracellular matrix organization-%%-GO:0060041-&&-retina development in camera-type eye","cellular_component-&-1&-GO:0016020-&&-membrane-%%-GO:0005576-&&-extracellular region-%%-GO:0005578-…	["KEGG-&-1&-hsa05146-&&-Amoebiasis-%%-hsa04510-&&-Focal adhesion-%%-hsa04512-&&-ECM-receptor interaction-%%-hsa04151-&&-PI3K-Akt signaling pathway-%%-hsa05165-&&-Human papillomavirus infection-%%-hsa05145-&&-Toxoplasmosis-%%-hsa05200-&&-Pathways in cancer-%%-hsa05222-&&-Small cell lung cancer"]	LAMC3	Homo sapiens (Human)-&&-9606	taxon:9606	["Gene Symbol-&-1&-LAMC3"]	[""]	FALSE	5	5
ZSCAN20	ZSCAN20	G:9606:ZSCAN20	176489	1902	zinc finger and SCAN domain containing 20	gene	["biological_process-&-1&-GO:0006351-&&-transcription, DNA-templated-%%-GO:0006355-&&-regulation of transcription, DNA-templated","cellular_component-&-1&-GO:0005634-&&-nucleus","molecular_function-&-1&-GO:0003677-&&-DNA binding-%%-GO:0003700-&&-transcription factor activity, sequence-specific DNA binding-%%-GO:0046872-&&-metal ion binding"]	[""]	ZSCAN20	Homo sapiens (Human)-&&-9606	taxon:9606	["Gene Symbol-&-1&-ZSCAN20"]	[""]	FALSE	8	8
P4HB	P4HB	G:9606:P4HB	178537	1902	prolyl 4-hydroxylase subunit beta	gene	["biological_process-&-1&-GO:0000302-&&-response to reactive oxygen species-%%-GO:0006457-&&-protein folding-%%-GO:0045454-&&-cell redox homeostasis-%%-GO:0018401-&&-peptidyl-proline hydroxylation to 4-hydroxy-L-proline-%%-GO:0034976-&&-response to endoplasmic reticulum stress-%%-GO:0042158-&&-lipoprotein biosynthetic process-%%-GO:0046598-&&-positive regulation of viral entry into host cell-%%-G…	["KEGG-&-1&-hsa04141-&&-Protein processing in endoplasmic reticulum"]	P4HB	Homo sapiens (Human)-&&-9606	taxon:9606	["Gene Symbol-&-1&-P4HB"]	[""]	FALSE	46	46
ACKR2	ACKR2	G:9606:ACKR2	182636	1902	atypical chemokine receptor 2	gene	["biological_process-&-1&-GO:0006898-&&-receptor-mediated endocytosis-%%-GO:0006935-&&-chemotaxis-%%-GO:0006954-&&-inflammatory response-%%-GO:0006955-&&-immune response-%%-GO:0007186-&&-G-protein coupled receptor signaling pathway-%%-GO:0007275-&&-multicellular organism development-%%-GO:0070098-&&-chemokine-mediated signaling pathway","cellular_component-&-1&-GO:0005886-&&-plasma membrane-%%-GO…	[""]	ACKR2	Homo sapiens (Human)-&&-9606	taxon:9606	["Gene Symbol-&-1&-ACKR2"]	[""]	FALSE	5	5
CCR3	CCR3	G:9606:CCR3	182642	1902	C-C motif chemokine receptor 3	gene	["biological_process-&-1&-GO:0001938-&&-positive regulation of endothelial cell proliferation-%%-GO:0007155-&&-cell adhesion-%%-GO:0006935-&&-chemotaxis-%%-GO:0006954-&&-inflammatory response-%%-GO:0006968-&&-cellular defense response-%%-GO:0007188-&&-adenylate cyclase-modulating G-protein coupled receptor signaling pathway-%%-GO:0007204-&&-positive regulation of cytosolic calcium ion concentrati…	["KEGG-&-1&-hsa04062-&&-Chemokine signaling pathway-%%-hsa05163-&&-Human cytomegalovirus infection-%%-hsa04060-&&-Cytokine-cytokine receptor interaction-%%-hsa05203-&&-Viral carcinogenesis-%%-hsa05167-&&-Kaposi sarcoma-associated herpesvirus infection"]	CCR3	Homo sapiens (Human)-&&-9606	taxon:9606	["Gene Symbol-&-1&-CCR3"]	[""]	FALSE	6	6
CCR1	CCR1	G:9606:CCR1	182643	1902	C-C motif chemokine receptor 1	gene	["biological_process-&-1&-GO:0002407-&&-dendritic cell chemotaxis-%%-GO:0007267-&&-cell-cell signaling-%%-GO:0007155-&&-cell adhesion-%%-GO:0006816-&&-calcium ion transport-%%-GO:0006874-&&-cellular calcium ion homeostasis-%%-GO:0006887-&&-exocytosis-%%-GO:0006935-&&-chemotaxis-%%-GO:0006954-&&-inflammatory response-%%-GO:0006955-&&-immune response-%%-GO:0007166-&&-cell surface receptor signaling…	["KEGG-&-1&-hsa04062-&&-Chemokine signaling pathway-%%-hsa05163-&&-Human cytomegalovirus infection-%%-hsa04060-&&-Cytokine-cytokine receptor interaction-%%-hsa05167-&&-Kaposi sarcoma-associated herpesvirus infection"]	CCR1	Homo sapiens (Human)-&&-9606	taxon:9606	["Gene Symbol-&-1&-CCR1"]	[""]	FALSE	8	8
CCR5	CCR5	G:9606:CCR5	182640	1902	C-C motif chemokine receptor 5 (gene/pseudogene)	gene	["biological_process-&-1&-GO:0000165-&&-MAPK cascade-%%-GO:0002407-&&-dendritic cell chemotaxis-%%-GO:0007267-&&-cell-cell signaling-%%-GO:0006816-&&-calcium ion transport-%%-GO:0006935-&&-chemotaxis-%%-GO:0006954-&&-inflammatory response-%%-GO:0006955-&&-immune response-%%-GO:0006968-&&-cellular defense response-%%-GO:0007166-&&-cell surface receptor signaling pathway-%%-GO:0007186-&&-G-protein …	["KEGG-&-1&-hsa04062-&&-Chemokine signaling pathway-%%-hsa05163-&&-Human cytomegalovirus infection-%%-hsa04144-&&-Endocytosis-%%-hsa04060-&&-Cytokine-cytokine receptor interaction-%%-hsa05145-&&-Toxoplasmosis-%%-hsa05203-&&-Viral carcinogenesis-%%-hsa05170-&&-Human immunodeficiency virus 1 infection-%%-hsa05167-&&-Kaposi sarcoma-associated herpesvirus infection"]	CCR5	Homo sapiens (Human)-&&-9606	taxon:9606	["Gene Symbol-&-1&-CCR5"]	[""]	FALSE	20	20
CMA1	CMA1	G:9606:CMA1	182646	1902	chymase 1	gene	["biological_process-&-1&-GO:0002003-&&-angiotensin maturation-%%-GO:0016485-&&-protein processing-%%-GO:0022617-&&-extracellular matrix disassembly-%%-GO:0030901-&&-midbrain development-%%-GO:0045766-&&-positive regulation of angiogenesis-%%-GO:0050720-&&-interleukin-1 beta biosynthetic process-%%-GO:0050727-&&-regulation of inflammatory response-%%-GO:0071333-&&-cellular response to glucose sti…	["KEGG-&-1&-hsa04614-&&-Renin-angiotensin system"]	CMA1	Homo sapiens (Human)-&&-9606	taxon:9606	["Gene Symbol-&-1&-CMA1"]	[""]	FALSE	5	5
2020-03-06	2020-03-06	G:9606:MARCH6	174455	1902	membrane associated ring-CH-type finger 6	gene	["biological_process-&-1&-GO:0010498-&&-proteasomal protein catabolic process-%%-GO:0030433-&&-ER-associated ubiquitin-dependent protein catabolic process-%%-GO:0036503-&&-ERAD pathway-%%-GO:0070936-&&-protein K48-linked ubiquitination-%%-GO:1904380-&&-endoplasmic reticulum mannose trimming","cellular_component-&-1&-GO:0016021-&&-integral component of membrane-%%-GO:0000835-&&-ER ubiquitin ligase…	["KEGG-&-1&-hsa04141-&&-Protein processing in endoplasmic reticulum"]	2020-03-06	Homo sapiens (Human)-&&-9606	taxon:9606	["Gene Symbol-&-1&-MARCH6"]	[""]	FALSE	4	4
CLTC	CLTC	G:9606:CLTC	182647	1902	clathrin heavy chain	gene	["biological_process-&-1&-GO:0001649-&&-osteoblast differentiation-%%-GO:0006886-&&-intracellular protein transport-%%-GO:0006898-&&-receptor-mediated endocytosis-%%-GO:0006914-&&-autophagy-%%-GO:0007018-&&-microtubule-based movement-%%-GO:0007067-&&-mitotic nuclear division-%%-GO:0019886-&&-antigen processing and presentation of exogenous peptide antigen via MHC class II-%%-GO:0031623-&&-recepto…	["KEGG-&-1&-hsa04142-&&-Lysosome-%%-hsa04144-&&-Endocytosis-%%-hsa05100-&&-Bacterial invasion of epithelial cells-%%-hsa04721-&&-Synaptic vesicle cycle-%%-hsa05016-&&-Huntington disease-%%-hsa04961-&&-Endocrine and other factor-regulated calcium reabsorption"]	CLTC	Homo sapiens (Human)-&&-9606	taxon:9606	["Gene Symbol-&-1&-CLTC"]	[""]	FALSE	108	223.49	108
CNBP	CNBP	G:9606:CNBP	176506	1902	CCHC-type zinc finger nucleic acid binding protein	gene	["biological_process-&-1&-GO:0000122-&&-negative regulation of transcription from RNA polymerase II promoter-%%-GO:0006351-&&-transcription, DNA-templated-%%-GO:0006355-&&-regulation of transcription, DNA-templated-%%-GO:0006695-&&-cholesterol biosynthetic process-%%-GO:0008284-&&-positive regulation of cell proliferation-%%-GO:0045893-&&-positive regulation of transcription, DNA-templated-%%-GO:…	[""]	CNBP	Homo sapiens (Human)-&&-9606	taxon:9606	["Gene Symbol-&-1&-CNBP"]	[""]	FALSE	42	42
CLTA	CLTA	G:9606:CLTA	182649	1902	clathrin light chain A	gene	["biological_process-&-1&-GO:0006886-&&-intracellular protein transport-%%-GO:0006898-&&-receptor-mediated endocytosis-%%-GO:0007018-&&-microtubule-based movement-%%-GO:0007067-&&-mitotic nuclear division-%%-GO:0019886-&&-antigen processing and presentation of exogenous peptide antigen via MHC class II-%%-GO:0051301-&&-cell division-%%-GO:0061024-&&-membrane organization-%%-GO:0072583-&&-clathrin…	["KEGG-&-1&-hsa04142-&&-Lysosome-%%-hsa04144-&&-Endocytosis-%%-hsa05100-&&-Bacterial invasion of epithelial cells-%%-hsa04721-&&-Synaptic vesicle cycle-%%-hsa05016-&&-Huntington disease-%%-hsa04961-&&-Endocrine and other factor-regulated calcium reabsorption"]	CLTA	Homo sapiens (Human)-&&-9606	taxon:9606	["Gene Symbol-&-1&-CLTA"]	[""]	FALSE	28	28
GNB1	GNB1	G:9606:GNB1	180606	1902	G protein subunit beta 1	gene	["biological_process-&-1&-GO:0006457-&&-protein folding-%%-GO:0007223-&&-Wnt signaling pathway, calcium modulating pathway-%%-GO:0007165-&&-signal transduction-%%-GO:0007191-&&-adenylate cyclase-activating dopamine receptor signaling pathway-%%-GO:0007200-&&-phospholipase C-activating G-protein coupled receptor signaling pathway-%%-GO:0007204-&&-positive regulation of cytosolic calcium ion concen…	["KEGG-&-1&-hsa04062-&&-Chemokine signaling pathway-%%-hsa04740-&&-Olfactory transduction-%%-hsa04744-&&-Phototransduction-%%-hsa05032-&&-Morphine addiction-%%-hsa04727-&&-GABAergic synapse-%%-hsa04724-&&-Glutamatergic synapse-%%-hsa04926-&&-Relaxin signaling pathway-%%-hsa05200-&&-Pathways in cancer-%%-hsa04014-&&-Ras signaling pathway-%%-hsa05163-&&-Human cytomegalovirus infection-%%-hsa04713-&…	GNB1	Homo sapiens (Human)-&&-9606	taxon:9606	["Gene Symbol-&-1&-GNB1"]	[""]	FALSE	28	28
CLN5	CLN5	G:9606:CLN5	182654	1902	ceroid-lipofuscinosis, neuronal 5	gene	["biological_process-&-1&-GO:0006465-&&-signal peptide processing-%%-GO:0007042-&&-lysosomal lumen acidification-%%-GO:0007420-&&-brain development-%%-GO:0022008-&&-neurogenesis-%%-GO:0030163-&&-protein catabolic process-%%-GO:0042147-&&-retrograde transport, endosome to Golgi-%%-GO:0042551-&&-neuron maturation-%%-GO:0070085-&&-glycosylation-%%-GO:1904426-&&-positive regulation of GTP binding","c…	["KEGG-&-1&-hsa04142-&&-Lysosome"]	CLN5	Homo sapiens (Human)-&&-9606	taxon:9606	["Gene Symbol-&-1&-CLN5"]	[""]	FALSE	15	15
ARRDC1	ARRDC1	G:9606:ARRDC1	166271	1902	arrestin domain containing 1	gene	["cellular_component-&-1&-GO:0005886-&&-plasma membrane-%%-GO:0031410-&&-cytoplasmic vesicle-%%-GO:0070062-&&-extracellular exosome","molecular_function-&-1&-GO:0005515-&&-protein binding"]	[""]	ARRDC1	Homo sapiens (Human)-&&-9606	taxon:9606	["Gene Symbol-&-1&-ARRDC1"]	[""]	FALSE	12	12
GNB2	GNB2	G:9606:GNB2	180605	1902	G protein subunit beta 2	gene	["biological_process-&-1&-GO:0006457-&&-protein folding-%%-GO:0007186-&&-G-protein coupled receptor signaling pathway-%%-GO:0065009-&&-regulation of molecular function-%%-GO:0071377-&&-cellular response to glucagon stimulus","cellular_component-&-1&-GO:0005886-&&-plasma membrane-%%-GO:0016020-&&-membrane-%%-GO:0005829-&&-cytosol-%%-GO:0005615-&&-extracellular space-%%-GO:0005765-&&-lysosomal memb…	["KEGG-&-1&-hsa04062-&&-Chemokine signaling pathway-%%-hsa05032-&&-Morphine addiction-%%-hsa04727-&&-GABAergic synapse-%%-hsa04724-&&-Glutamatergic synapse-%%-hsa04926-&&-Relaxin signaling pathway-%%-hsa04014-&&-Ras signaling pathway-%%-hsa05200-&&-Pathways in cancer-%%-hsa05163-&&-Human cytomegalovirus infection-%%-hsa04713-&&-Circadian entrainment-%%-hsa04151-&&-PI3K-Akt signaling pathway-%%-hs…	GNB2	Homo sapiens (Human)-&&-9606	taxon:9606	["Gene Symbol-&-1&-GNB2"]	[""]	FALSE	47	47
RPL14	RPL14	G:9606:RPL14	176514	1902	ribosomal protein L14	gene	["biological_process-&-1&-GO:0000184-&&-nuclear-transcribed mRNA catabolic process, nonsense-mediated decay-%%-GO:0006364-&&-rRNA processing-%%-GO:0006412-&&-translation-%%-GO:0006413-&&-translational initiation-%%-GO:0006614-&&-SRP-dependent cotranslational protein targeting to membrane-%%-GO:0019083-&&-viral transcription-%%-GO:0042273-&&-ribosomal large subunit biogenesis","cellular_component-…	["KEGG-&-1&-hsa03010-&&-Ribosome"]	RPL14	Homo sapiens (Human)-&&-9606	taxon:9606	["Gene Symbol-&-1&-RPL14"]	[""]	FALSE	109	114.264	109
ORM1	ORM1	G:9606:ORM1	178563	1902	orosomucoid 1	gene	["biological_process-&-1&-GO:0002576-&&-platelet degranulation-%%-GO:0002682-&&-regulation of immune system process-%%-GO:0006953-&&-acute-phase response-%%-GO:0006954-&&-inflammatory response-%%-GO:0032715-&&-negative regulation of interleukin-6 production-%%-GO:0032720-&&-negative regulation of tumor necrosis factor production-%%-GO:0043312-&&-neutrophil degranulation","cellular_component-&-1&-…	[""]	ORM1	Homo sapiens (Human)-&&-9606	taxon:9606	["Gene Symbol-&-1&-ORM1"]	[""]	FALSE	7	7
GNAT2	GNAT2	G:9606:GNAT2	180608	1902	G protein subunit alpha transducin 2	gene	["biological_process-&-1&-GO:0001580-&&-detection of chemical stimulus involved in sensory perception of bitter taste-%%-GO:0006457-&&-protein folding-%%-GO:0007223-&&-Wnt signaling pathway, calcium modulating pathway-%%-GO:0007186-&&-G-protein coupled receptor signaling pathway-%%-GO:0007188-&&-adenylate cyclase-modulating G-protein coupled receptor signaling pathway-%%-GO:0007204-&&-positive re…	["KEGG-&-1&-hsa04744-&&-Phototransduction"]	GNAT2	Homo sapiens (Human)-&&-9606	taxon:9606	["Gene Symbol-&-1&-GNAT2"]	[""]	FALSE	3	3
OSM	OSM	G:9606:OSM	178560	1902	oncostatin M	gene	["biological_process-&-1&-GO:0002675-&&-positive regulation of acute inflammatory response-%%-GO:0006955-&&-immune response-%%-GO:0007275-&&-multicellular organism development-%%-GO:0007422-&&-peripheral nervous system development-%%-GO:0008283-&&-cell proliferation-%%-GO:0008284-&&-positive regulation of cell proliferation-%%-GO:0008285-&&-negative regulation of cell proliferation-%%-GO:0009408-…	["KEGG-&-1&-hsa04060-&&-Cytokine-cytokine receptor interaction-%%-hsa04151-&&-PI3K-Akt signaling pathway-%%-hsa04630-&&-JAK-STAT signaling pathway"]	OSM	Homo sapiens (Human)-&&-9606	taxon:9606	["Gene Symbol-&-1&-OSM"]	[""]	FALSE	10	10
CLIC1	CLIC1	G:9606:CLIC1	182662	1902	chloride intracellular channel 1	gene	["biological_process-&-1&-GO:0051726-&&-regulation of cell cycle-%%-GO:0007165-&&-signal transduction-%%-GO:0006821-&&-chloride transport-%%-GO:0034765-&&-regulation of ion transmembrane transport-%%-GO:0045669-&&-positive regulation of osteoblast differentiation-%%-GO:0051881-&&-regulation of mitochondrial membrane potential-%%-GO:0070527-&&-platelet aggregation-%%-GO:1902476-&&-chloride transme…	[""]	CLIC1	Homo sapiens (Human)-&&-9606	taxon:9606	["Gene Symbol-&-1&-CLIC1"]	[""]	FALSE	15	15
TMEM168	TMEM168	G:9606:TMEM168	168326	1902	transmembrane protein 168	gene	["cellular_component-&-1&-GO:0016021-&&-integral component of membrane-%%-GO:0030133-&&-transport vesicle"]	[""]	TMEM168	Homo sapiens (Human)-&&-9606	taxon:9606	["Gene Symbol-&-1&-TMEM168"]	[""]	FALSE	1	1
CLU	CLU	G:9606:CLU	182663	1902	clusterin	gene	["biological_process-&-1&-GO:0000902-&&-cell morphogenesis-%%-GO:0001774-&&-microglial cell activation-%%-GO:0001836-&&-release of cytochrome c from mitochondria-%%-GO:0002576-&&-platelet degranulation-%%-GO:0019730-&&-antimicrobial humoral response-%%-GO:0009615-&&-response to virus-%%-GO:0006956-&&-complement activation-%%-GO:0051131-&&-chaperone-mediated protein complex assembly-%%-GO:0006629-…	["KEGG-&-1&-hsa04610-&&-Complement and coagulation cascades"]	CLU	Homo sapiens (Human)-&&-9606	taxon:9606	["Gene Symbol-&-1&-CLU"]	[""]	FALSE	37	37
GNAI3	GNAI3	G:9606:GNAI3	180615	1902	G protein subunit alpha i3	gene	["biological_process-&-1&-GO:0006457-&&-protein folding-%%-GO:0006906-&&-vesicle fusion-%%-GO:0006810-&&-transport-%%-GO:0007049-&&-cell cycle-%%-GO:0007193-&&-adenylate cyclase-inhibiting G-protein coupled receptor signaling pathway-%%-GO:0007194-&&-negative regulation of adenylate cyclase activity-%%-GO:0007212-&&-dopamine receptor signaling pathway-%%-GO:0046039-&&-GTP metabolic process-%%-GO:…	["KEGG-&-1&-hsa04062-&&-Chemokine signaling pathway-%%-hsa04916-&&-Melanogenesis-%%-hsa04611-&&-Platelet activation-%%-hsa05032-&&-Morphine addiction-%%-hsa04934-&&-Cushing syndrome-%%-hsa05163-&&-Human cytomegalovirus infection-%%-hsa04921-&&-Oxytocin signaling pathway-%%-hsa04713-&&-Circadian entrainment-%%-hsa04923-&&-Regulation of lipolysis in adipocytes-%%-hsa04024-&&-cAMP signaling pathway-…	GNAI3	Homo sapiens (Human)-&&-9606	taxon:9606	["Gene Symbol-&-1&-GNAI3"]	[""]	FALSE	30	30
ORC4	ORC4	G:9606:ORC4	178567	1902	origin recognition complex subunit 4	gene	["biological_process-&-1&-GO:0006260-&&-DNA replication-%%-GO:0000082-&&-G1/S transition of mitotic cell cycle-%%-GO:0006270-&&-DNA replication initiation","cellular_component-&-1&-GO:0000784-&&-nuclear chromosome, telomeric region-%%-GO:0000808-&&-origin recognition complex-%%-GO:0005829-&&-cytosol-%%-GO:0005634-&&-nucleus-%%-GO:0005654-&&-nucleoplasm-%%-GO:0005664-&&-nuclear origin of replicati…	["KEGG-&-1&-hsa04110-&&-Cell cycle"]	ORC4	Homo sapiens (Human)-&&-9606	taxon:9606	["Gene Symbol-&-1&-ORC4"]	[""]	FALSE	28	28
UBE2M	UBE2M	G:9606:UBE2M	176517	1902	ubiquitin conjugating enzyme E2 M	gene	["biological_process-&-1&-GO:0016567-&&-protein ubiquitination-%%-GO:0006464-&&-cellular protein modification process-%%-GO:0007179-&&-transforming growth factor beta receptor signaling pathway-%%-GO:0045116-&&-protein neddylation-%%-GO:0038061-&&-NIK/NF-kappaB signaling-%%-GO:0043525-&&-positive regulation of neuron apoptotic process","cellular_component-&-1&-GO:0005829-&&-cytosol-%%-GO:0005737-…	["KEGG-&-1&-hsa04120-&&-Ubiquitin mediated proteolysis"]	UBE2M	Homo sapiens (Human)-&&-9606	taxon:9606	["Gene Symbol-&-1&-UBE2M"]	[""]	FALSE	26	26
BYSL	BYSL	G:9606:BYSL	182666	1902	bystin like	gene	["biological_process-&-1&-GO:0000462-&&-maturation of SSU-rRNA from tricistronic rRNA transcript (SSU-rRNA, 5.8S rRNA, LSU-rRNA)-%%-GO:0001829-&&-trophectodermal cell differentiation-%%-GO:0007155-&&-cell adhesion-%%-GO:0006364-&&-rRNA processing-%%-GO:0007565-&&-female pregnancy-%%-GO:0008283-&&-cell proliferation","cellular_component-&-1&-GO:0016020-&&-membrane-%%-GO:0005829-&&-cytosol-%%-GO:00…	[""]	BYSL	Homo sapiens (Human)-&&-9606	taxon:9606	["Gene Symbol-&-1&-BYSL"]	[""]	FALSE	19	19
GNA15	GNA15	G:9606:GNA15	180619	1902	G protein subunit alpha 15	gene	["biological_process-&-1&-GO:0007188-&&-adenylate cyclase-modulating G-protein coupled receptor signaling pathway-%%-GO:0007202-&&-activation of phospholipase C activity-%%-GO:0007204-&&-positive regulation of cytosolic calcium ion concentration-%%-GO:0007207-&&-phospholipase C-activating G-protein coupled acetylcholine receptor signaling pathway-%%-GO:0030168-&&-platelet activation-%%-GO:0060158…	["KEGG-&-1&-hsa05146-&&-Amoebiasis-%%-hsa04020-&&-Calcium signaling pathway-%%-hsa05142-&&-Chagas disease (American trypanosomiasis)-%%-hsa04926-&&-Relaxin signaling pathway"]	GNA15	Homo sapiens (Human)-&&-9606	taxon:9606	["Gene Symbol-&-1&-GNA15"]	[""]	FALSE	10	10
TIMM50	TIMM50	G:9606:TIMM50	166280	1902	translocase of inner mitochondrial membrane 50	gene	["biological_process-&-1&-GO:0001836-&&-release of cytochrome c from mitochondria-%%-GO:0006470-&&-protein dephosphorylation-%%-GO:0007006-&&-mitochondrial membrane organization-%%-GO:0030150-&&-protein import into mitochondrial matrix-%%-GO:0035335-&&-peptidyl-tyrosine dephosphorylation","cellular_component-&-1&-GO:0016021-&&-integral component of membrane-%%-GO:0005739-&&-mitochondrion-%%-GO:00…	[""]	TIMM50	Homo sapiens (Human)-&&-9606	taxon:9606	["Gene Symbol-&-1&-TIMM50"]	[""]	FALSE	26	26
C1QBP	C1QBP	G:9606:C1QBP	182664	1902	complement C1q binding protein	gene	["biological_process-&-1&-GO:0000122-&&-negative regulation of transcription from RNA polymerase II promoter-%%-GO:0006915-&&-apoptotic process-%%-GO:0006351-&&-transcription, DNA-templated-%%-GO:0006397-&&-mRNA processing-%%-GO:0006955-&&-immune response-%%-GO:0006958-&&-complement activation, classical pathway-%%-GO:0007597-&&-blood coagulation, intrinsic pathway-%%-GO:0008380-&&-RNA splicing-%…	["KEGG-&-1&-hsa05168-&&-Herpes simplex infection"]	C1QBP	Homo sapiens (Human)-&&-9606	taxon:9606	["Gene Symbol-&-1&-C1QBP"]	[""]	FALSE	61	62.8888	61
ORC2	ORC2	G:9606:ORC2	178568	1902	origin recognition complex subunit 2	gene	["biological_process-&-1&-GO:0006260-&&-DNA replication-%%-GO:0000082-&&-G1/S transition of mitotic cell cycle-%%-GO:0000122-&&-negative regulation of transcription from RNA polymerase II promoter-%%-GO:0006270-&&-DNA replication initiation","cellular_component-&-1&-GO:0000784-&&-nuclear chromosome, telomeric region-%%-GO:0000792-&&-heterochromatin-%%-GO:0000808-&&-origin recognition complex-%%-G…	["KEGG-&-1&-hsa04110-&&-Cell cycle"]	ORC2	Homo sapiens (Human)-&&-9606	taxon:9606	["Gene Symbol-&-1&-ORC2"]	[""]	FALSE	37	37
GNAI2	GNAI2	G:9606:GNAI2	180617	1902	G protein subunit alpha i2	gene	["biological_process-&-1&-GO:0000186-&&-activation of MAPKK activity-%%-GO:0001973-&&-adenosine receptor signaling pathway-%%-GO:0006457-&&-protein folding-%%-GO:0007165-&&-signal transduction-%%-GO:0035556-&&-intracellular signal transduction-%%-GO:0007049-&&-cell cycle-%%-GO:0007186-&&-G-protein coupled receptor signaling pathway-%%-GO:0007193-&&-adenylate cyclase-inhibiting G-protein coupled r…	["KEGG-&-1&-hsa04062-&&-Chemokine signaling pathway-%%-hsa04611-&&-Platelet activation-%%-hsa04916-&&-Melanogenesis-%%-hsa05032-&&-Morphine addiction-%%-hsa04934-&&-Cushing syndrome-%%-hsa05163-&&-Human cytomegalovirus infection-%%-hsa04921-&&-Oxytocin signaling pathway-%%-hsa04713-&&-Circadian entrainment-%%-hsa04923-&&-Regulation of lipolysis in adipocytes-%%-hsa04024-&&-cAMP signaling pathway-…	GNAI2	Homo sapiens (Human)-&&-9606	taxon:9606	["Gene Symbol-&-1&-GNAI2"]	[""]	FALSE	42	42
ILVBL	ILVBL	G:9606:ILVBL	174478	1902	ilvB acetolactate synthase like	gene	["biological_process-&-1&-GO:0008150-&&-biological_process","cellular_component-&-1&-GO:0016021-&&-integral component of membrane-%%-GO:0016020-&&-membrane","molecular_function-&-1&-GO:0005515-&&-protein binding-%%-GO:0000287-&&-magnesium ion binding-%%-GO:0003674-&&-molecular_function-%%-GO:0016740-&&-transferase activity-%%-GO:0030976-&&-thiamine pyrophosphate binding"]	[""]	ILVBL	Homo sapiens (Human)-&&-9606	taxon:9606	["Gene Symbol-&-1&-ILVBL"]	[""]	FALSE	15	15
GNA11	GNA11	G:9606:GNA11	180621	1902	G protein subunit alpha 11	gene	["biological_process-&-1&-GO:0001501-&&-skeletal system development-%%-GO:0001508-&&-action potential-%%-GO:0007165-&&-signal transduction-%%-GO:0007188-&&-adenylate cyclase-modulating G-protein coupled receptor signaling pathway-%%-GO:0007213-&&-G-protein coupled acetylcholine receptor signaling pathway-%%-GO:0007507-&&-heart development-%%-GO:0007603-&&-phototransduction, visible light-%%-GO:00…	["KEGG-&-1&-hsa04540-&&-Gap junction-%%-hsa04911-&&-Insulin secretion-%%-hsa05146-&&-Amoebiasis-%%-hsa04925-&&-Aldosterone synthesis and secretion-%%-hsa04020-&&-Calcium signaling pathway-%%-hsa05200-&&-Pathways in cancer-%%-hsa04270-&&-Vascular smooth muscle contraction-%%-hsa04934-&&-Cushing syndrome-%%-hsa04912-&&-GnRH signaling pathway-%%-hsa05163-&&-Human cytomegalovirus infection-%%-hsa0492…	GNA11	Homo sapiens (Human)-&&-9606	taxon:9606	["Gene Symbol-&-1&-GNA11"]	[""]	FALSE	11	11
IMMT	IMMT	G:9606:IMMT	174483	1902	inner membrane mitochondrial protein	gene	["biological_process-&-1&-GO:0008150-&&-biological_process-%%-GO:0042407-&&-cristae formation-%%-GO:0051560-&&-mitochondrial calcium ion homeostasis","cellular_component-&-1&-GO:0016020-&&-membrane-%%-GO:0005739-&&-mitochondrion-%%-GO:0005743-&&-mitochondrial inner membrane-%%-GO:0043209-&&-myelin sheath-%%-GO:0061617-&&-MICOS complex","molecular_function-&-1&-GO:0005515-&&-protein binding-%%-GO:…	[""]	IMMT	Homo sapiens (Human)-&&-9606	taxon:9606	["Gene Symbol-&-1&-IMMT"]	[""]	FALSE	39	39
BTK	BTK	G:9606:BTK	182672	1902	Bruton tyrosine kinase	gene	["biological_process-&-1&-GO:0001805-&&-positive regulation of type III hypersensitivity-%%-GO:0001812-&&-positive regulation of type I hypersensitivity-%%-GO:0001818-&&-negative regulation of cytokine production-%%-GO:0002250-&&-adaptive immune response-%%-GO:0002344-&&-B cell affinity maturation-%%-GO:0002553-&&-histamine secretion by mast cell-%%-GO:0002721-&&-regulation of B cell cytokine pro…	["KEGG-&-1&-hsa04064-&&-NF-kappa B signaling pathway-%%-hsa04611-&&-Platelet activation-%%-hsa04664-&&-Fc epsilon RI signaling pathway-%%-hsa05340-&&-Primary immunodeficiency-%%-hsa04662-&&-B cell receptor signaling pathway-%%-hsa05169-&&-Epstein-Barr virus infection-%%-hsa04380-&&-Osteoclast differentiation"]	BTK	Homo sapiens (Human)-&&-9606	taxon:9606	["Gene Symbol-&-1&-BTK"]	[""]	FALSE	43	43
GCN1	GCN1	G:9606:GCN1	174487	1902	GCN1, eIF2 alpha kinase activator homolog	gene	["biological_process-&-1&-GO:0006412-&&-translation-%%-GO:0006417-&&-regulation of translation-%%-GO:0033674-&&-positive regulation of kinase activity-%%-GO:0034198-&&-cellular response to amino acid starvation-%%-GO:0036003-&&-positive regulation of transcription from RNA polymerase II promoter in response to stress-%%-GO:0045859-&&-regulation of protein kinase activity-%%-GO:1990253-&&-cellular…	[""]	GCN1	Homo sapiens (Human)-&&-9606	taxon:9606	["Gene Symbol-&-1&-GCN1"]	[""]	FALSE	30	30
MMP25	MMP25	G:9606:MMP25	168343	1902	matrix metallopeptidase 25	gene	["biological_process-&-1&-GO:0006508-&&-proteolysis-%%-GO:0006954-&&-inflammatory response-%%-GO:0043312-&&-neutrophil degranulation-%%-GO:0060022-&&-hard palate development","cellular_component-&-1&-GO:0005886-&&-plasma membrane-%%-GO:0016021-&&-integral component of membrane-%%-GO:0016020-&&-membrane-%%-GO:0005578-&&-proteinaceous extracellular matrix-%%-GO:0031225-&&-anchored component of memb…	["KEGG-&-1&-hsa04928-&&-Parathyroid hormone synthesis, secretion and action"]	MMP25	Homo sapiens (Human)-&&-9606	taxon:9606	["Gene Symbol-&-1&-MMP25"]	[""]	FALSE	2	2
RANBP3	RANBP3	G:9606:RANBP3	176532	1902	RAN binding protein 3	gene	["biological_process-&-1&-GO:0000082-&&-G1/S transition of mitotic cell cycle-%%-GO:0006606-&&-protein import into nucleus-%%-GO:0006405-&&-RNA export from nucleus-%%-GO:0006511-&&-ubiquitin-dependent protein catabolic process-%%-GO:0007051-&&-spindle organization-%%-GO:0043547-&&-positive regulation of GTPase activity-%%-GO:0046604-&&-positive regulation of mitotic centrosome separation","cellul…	["KEGG-&-1&-hsa05166-&&-Human T-cell leukemia virus 1 infection"]	RANBP3	Homo sapiens (Human)-&&-9606	taxon:9606	["Gene Symbol-&-1&-RANBP3"]	[""]	FALSE	17	17
COPS5	COPS5	G:9606:COPS5	174485	1902	COP9 signalosome subunit 5	gene	["biological_process-&-1&-GO:0000338-&&-protein deneddylation-%%-GO:0000715-&&-nucleotide-excision repair, DNA damage recognition-%%-GO:0006366-&&-transcription from RNA polymerase II promoter-%%-GO:0051726-&&-regulation of cell cycle-%%-GO:0006283-&&-transcription-coupled nucleotide-excision repair-%%-GO:0006412-&&-translation-%%-GO:0006413-&&-translational initiation-%%-GO:0016579-&&-protein de…	[""]	COPS5	Homo sapiens (Human)-&&-9606	taxon:9606	["Gene Symbol-&-1&-COPS5"]	[""]	FALSE	279	1376	279
KLF5	KLF5	G:9606:KLF5	182677	1902	Kruppel like factor 5	gene	["biological_process-&-1&-GO:0000122-&&-negative regulation of transcription from RNA polymerase II promoter-%%-GO:0001525-&&-angiogenesis-%%-GO:0006366-&&-transcription from RNA polymerase II promoter-%%-GO:0008284-&&-positive regulation of cell proliferation-%%-GO:0030033-&&-microvillus assembly-%%-GO:0032534-&&-regulation of microvillus assembly-%%-GO:0035914-&&-skeletal muscle cell differenti…	[""]	KLF5	Homo sapiens (Human)-&&-9606	taxon:9606	["Gene Symbol-&-1&-KLF5"]	[""]	FALSE	24	24
BST1	BST1	G:9606:BST1	182682	1902	bone marrow stromal cell antigen 1	gene	["biological_process-&-1&-GO:0001952-&&-regulation of cell-matrix adhesion-%%-GO:0002691-&&-regulation of cellular extravasation-%%-GO:0007165-&&-signal transduction-%%-GO:0006501-&&-C-terminal protein lipidation-%%-GO:0006959-&&-humoral immune response-%%-GO:0008284-&&-positive regulation of cell proliferation-%%-GO:0019674-&&-NAD metabolic process-%%-GO:0032956-&&-regulation of actin cytoskelet…	["KEGG-&-1&-hsa00760-&&-Nicotinate and nicotinamide metabolism-%%-hsa04970-&&-Salivary secretion-%%-hsa04972-&&-Pancreatic secretion-%%-hsa01100-&&-Metabolic pathways"]	BST1	Homo sapiens (Human)-&&-9606	taxon:9606	["Gene Symbol-&-1&-BST1"]	[""]	FALSE	1	1
GLUD1P5	GLUD1P5	G:9606:GLUD1P5	180634	1902	glutamate dehydrogenase 1 pseudogene 5	gene	[""]	[""]	GLUD1P5	Homo sapiens (Human)-&&-9606	taxon:9606	["Gene Symbol-&-1&-GLUD1P5"]	[""]	FALSE	14	14
RGS5	RGS5	G:9606:RGS5	176539	1902	regulator of G-protein signaling 5	gene	["biological_process-&-1&-GO:0008277-&&-regulation of G-protein coupled receptor protein signaling pathway-%%-GO:0009968-&&-negative regulation of signal transduction-%%-GO:0043547-&&-positive regulation of GTPase activity","cellular_component-&-1&-GO:0005886-&&-plasma membrane-%%-GO:0005829-&&-cytosol-%%-GO:0005737-&&-cytoplasm","molecular_function-&-1&-GO:0005096-&&-GTPase activator activity"]	[""]	RGS5	Homo sapiens (Human)-&&-9606	taxon:9606	["Gene Symbol-&-1&-RGS5"]	[""]	FALSE	4	4
BSG	BSG	G:9606:BSG	182683	1902	basigin (Ok blood group)	gene	["biological_process-&-1&-GO:0006090-&&-pyruvate metabolic process-%%-GO:0007166-&&-cell surface receptor signaling pathway-%%-GO:0007566-&&-embryo implantation-%%-GO:0015718-&&-monocarboxylic acid transport-%%-GO:0046689-&&-response to mercury ion-%%-GO:0022617-&&-extracellular matrix disassembly-%%-GO:0030198-&&-extracellular matrix organization-%%-GO:0042475-&&-odontogenesis of dentin-containi…	[""]	BSG	Homo sapiens (Human)-&&-9606	taxon:9606	["Gene Symbol-&-1&-BSG"]	[""]	FALSE	24	24
BTC	BTC	G:9606:BTC	182680	1902	betacellulin	gene	["biological_process-&-1&-GO:0000165-&&-MAPK cascade-%%-GO:0035810-&&-positive regulation of urine volume-%%-GO:0007173-&&-epidermal growth factor receptor signaling pathway-%%-GO:0043066-&&-negative regulation of apoptotic process-%%-GO:0008284-&&-positive regulation of cell proliferation-%%-GO:0014066-&&-regulation of phosphatidylinositol 3-kinase signaling-%%-GO:0018108-&&-peptidyl-tyrosine ph…	["KEGG-&-1&-hsa04012-&&-ErbB signaling pathway"]	BTC	Homo sapiens (Human)-&&-9606	taxon:9606	["Gene Symbol-&-1&-BTC"]	[""]	FALSE	4	4
GLUD1	GLUD1	G:9606:GLUD1	180638	1902	glutamate dehydrogenase 1	gene	["biological_process-&-1&-GO:0055114-&&-oxidation-reduction process-%%-GO:0006537-&&-glutamate biosynthetic process-%%-GO:0006538-&&-glutamate catabolic process-%%-GO:0006541-&&-glutamine metabolic process-%%-GO:0008652-&&-cellular amino acid biosynthetic process-%%-GO:0021762-&&-substantia nigra development-%%-GO:0032024-&&-positive regulation of insulin secretion-%%-GO:0072350-&&-tricarboxylic …	["KEGG-&-1&-hsa00471-&&-D-Glutamine and D-glutamate metabolism-%%-hsa04964-&&-Proximal tubule bicarbonate reclamation-%%-hsa00220-&&-Arginine biosynthesis-%%-hsa00910-&&-Nitrogen metabolism-%%-hsa01200-&&-Carbon metabolism-%%-hsa01100-&&-Metabolic pathways-%%-hsa04217-&&-Necroptosis-%%-hsa00250-&&-Alanine, aspartate and glutamate metabolism"]	GLUD1	Homo sapiens (Human)-&&-9606	taxon:9606	["Gene Symbol-&-1&-GLUD1"]	[""]	FALSE	14	14
OAT	OAT	G:9606:OAT	178594	1902	ornithine aminotransferase	gene	["biological_process-&-1&-GO:0007601-&&-visual perception-%%-GO:0008652-&&-cellular amino acid biosynthetic process-%%-GO:0034214-&&-protein hexamerization-%%-GO:0055129-&&-L-proline biosynthetic process","cellular_component-&-1&-GO:0005739-&&-mitochondrion-%%-GO:0005654-&&-nucleoplasm-%%-GO:0005759-&&-mitochondrial matrix","molecular_function-&-1&-GO:0004587-&&-ornithine-oxo-acid transaminase ac…	["KEGG-&-1&-hsa01100-&&-Metabolic pathways-%%-hsa00330-&&-Arginine and proline metabolism"]	OAT	Homo sapiens (Human)-&&-9606	taxon:9606	["Gene Symbol-&-1&-OAT"]	[""]	FALSE	13	13
CKAP4	CKAP4	G:9606:CKAP4	174500	1902	cytoskeleton associated protein 4	gene	["biological_process-&-1&-GO:0043312-&&-neutrophil degranulation-%%-GO:0044267-&&-cellular protein metabolic process","cellular_component-&-1&-GO:0005886-&&-plasma membrane-%%-GO:0016021-&&-integral component of membrane-%%-GO:0000932-&&-P-body-%%-GO:0016020-&&-membrane-%%-GO:0005829-&&-cytosol-%%-GO:0005783-&&-endoplasmic reticulum-%%-GO:0005789-&&-endoplasmic reticulum membrane-%%-GO:0005811-&&…	["KEGG-&-1&-hsa04141-&&-Protein processing in endoplasmic reticulum"]	CKAP4	Homo sapiens (Human)-&&-9606	taxon:9606	["Gene Symbol-&-1&-CKAP4"]	[""]	FALSE	31	31
NSD1	NSD1	G:9606:NSD1	168357	1902	nuclear receptor binding SET domain protein 1	gene	["biological_process-&-1&-GO:0000122-&&-negative regulation of transcription from RNA polymerase II promoter-%%-GO:0000414-&&-regulation of histone H3-K36 methylation-%%-GO:0006351-&&-transcription, DNA-templated-%%-GO:0010452-&&-histone H3-K36 methylation-%%-GO:0045893-&&-positive regulation of transcription, DNA-templated-%%-GO:0016571-&&-histone methylation-%%-GO:0033135-&&-regulation of pepti…	["KEGG-&-1&-hsa00310-&&-Lysine degradation"]	NSD1	Homo sapiens (Human)-&&-9606	taxon:9606	["Gene Symbol-&-1&-NSD1"]	[""]	FALSE	35	35
STIP1	STIP1	G:9606:STIP1	174505	1902	stress induced phosphoprotein 1	gene	["biological_process-&-1&-GO:0006950-&&-response to stress","cellular_component-&-1&-GO:0005634-&&-nucleus-%%-GO:0005794-&&-Golgi apparatus-%%-GO:0043209-&&-myelin sheath-%%-GO:0043234-&&-protein complex","molecular_function-&-1&-GO:0005515-&&-protein binding-%%-GO:0003723-&&-RNA binding-%%-GO:0051087-&&-chaperone binding-%%-GO:0008022-&&-protein C-terminus binding-%%-GO:0030544-&&-Hsp70 protein …	["KEGG-&-1&-hsa05020-&&-Prion diseases"]	STIP1	Homo sapiens (Human)-&&-9606	taxon:9606	["Gene Symbol-&-1&-STIP1"]	[""]	FALSE	46	46
BMX	BMX	G:9606:BMX	182702	1902	BMX non-receptor tyrosine kinase	gene	["biological_process-&-1&-GO:0001865-&&-NK T cell differentiation-%%-GO:0007155-&&-cell adhesion-%%-GO:0007165-&&-signal transduction-%%-GO:0007169-&&-transmembrane receptor protein tyrosine kinase signaling pathway-%%-GO:0035556-&&-intracellular signal transduction-%%-GO:0006468-&&-protein phosphorylation-%%-GO:0006661-&&-phosphatidylinositol biosynthetic process-%%-GO:0007498-&&-mesoderm develo…	[""]	BMX	Homo sapiens (Human)-&&-9606	taxon:9606	["Gene Symbol-&-1&-BMX"]	[""]	FALSE	15	15
BMPR2	BMPR2	G:9606:BMPR2	182703	1902	bone morphogenetic protein receptor type 2	gene	["biological_process-&-1&-GO:0001707-&&-mesoderm formation-%%-GO:0001893-&&-maternal placenta development-%%-GO:0001935-&&-endothelial cell proliferation-%%-GO:0001938-&&-positive regulation of endothelial cell proliferation-%%-GO:0001946-&&-lymphangiogenesis-%%-GO:0001974-&&-blood vessel remodeling-%%-GO:0002063-&&-chondrocyte development-%%-GO:0003085-&&-negative regulation of systemic arterial…	["KEGG-&-1&-hsa04550-&&-Signaling pathways regulating pluripotency of stem cells-%%-hsa04350-&&-TGF-beta signaling pathway-%%-hsa04060-&&-Cytokine-cytokine receptor interaction-%%-hsa05206-&&-MicroRNAs in cancer-%%-hsa04360-&&-Axon guidance-%%-hsa04390-&&-Hippo signaling pathway-%%-hsa05418-&&-Fluid shear stress and atherosclerosis"]	BMPR2	Homo sapiens (Human)-&&-9606	taxon:9606	["Gene Symbol-&-1&-BMPR2"]	[""]	FALSE	9	9
TOMM34	TOMM34	G:9606:TOMM34	174514	1902	translocase of outer mitochondrial membrane 34	gene	["biological_process-&-1&-GO:0006626-&&-protein targeting to mitochondrion","cellular_component-&-1&-GO:0016021-&&-integral component of membrane-%%-GO:0016020-&&-membrane-%%-GO:0005829-&&-cytosol-%%-GO:0005634-&&-nucleus-%%-GO:0005654-&&-nucleoplasm-%%-GO:0005741-&&-mitochondrial outer membrane","molecular_function-&-1&-GO:0005515-&&-protein binding-%%-GO:0031072-&&-heat shock protein binding"]	[""]	TOMM34	Homo sapiens (Human)-&&-9606	taxon:9606	["Gene Symbol-&-1&-TOMM34"]	[""]	FALSE	14	14
PTHLH	PTHLH	G:9606:PTHLH	178611	1902	parathyroid hormone like hormone	gene	["biological_process-&-1&-GO:0001501-&&-skeletal system development-%%-GO:0002076-&&-osteoblast development-%%-GO:0007267-&&-cell-cell signaling-%%-GO:0007189-&&-adenylate cyclase-activating G-protein coupled receptor signaling pathway-%%-GO:0007565-&&-female pregnancy-%%-GO:0008284-&&-positive regulation of cell proliferation-%%-GO:0008285-&&-negative regulation of cell proliferation-%%-GO:00460…	["KEGG-&-1&-hsa04928-&&-Parathyroid hormone synthesis, secretion and action"]	PTHLH	Homo sapiens (Human)-&&-9606	taxon:9606	["Gene Symbol-&-1&-PTHLH"]	[""]	FALSE	4	4
BMPR1A	BMPR1A	G:9606:BMPR1A	182705	1902	bone morphogenetic protein receptor type 1A	gene	["biological_process-&-1&-GO:0001701-&&-in utero embryonic development-%%-GO:0001707-&&-mesoderm formation-%%-GO:0001756-&&-somitogenesis-%%-GO:0001880-&&-Mullerian duct regression-%%-GO:0002053-&&-positive regulation of mesenchymal cell proliferation-%%-GO:0002062-&&-chondrocyte differentiation-%%-GO:0003148-&&-outflow tract septum morphogenesis-%%-GO:0003151-&&-outflow tract morphogenesis-%%-GO…	["KEGG-&-1&-hsa04550-&&-Signaling pathways regulating pluripotency of stem cells-%%-hsa04350-&&-TGF-beta signaling pathway-%%-hsa04060-&&-Cytokine-cytokine receptor interaction-%%-hsa04390-&&-Hippo signaling pathway-%%-hsa05418-&&-Fluid shear stress and atherosclerosis"]	BMPR1A	Homo sapiens (Human)-&&-9606	taxon:9606	["Gene Symbol-&-1&-BMPR1A"]	[""]	FALSE	12	12
CUL2	CUL2	G:9606:CUL2	176566	1902	cullin 2	gene	["biological_process-&-1&-GO:0000082-&&-G1/S transition of mitotic cell cycle-%%-GO:0042787-&&-protein ubiquitination involved in ubiquitin-dependent protein catabolic process-%%-GO:0007050-&&-cell cycle arrest-%%-GO:0008285-&&-negative regulation of cell proliferation-%%-GO:0016032-&&-viral process-%%-GO:0061418-&&-regulation of transcription from RNA polymerase II promoter in response to hypoxi…	["KEGG-&-1&-hsa04120-&&-Ubiquitin mediated proteolysis-%%-hsa05211-&&-Renal cell carcinoma-%%-hsa04066-&&-HIF-1 signaling pathway-%%-hsa05200-&&-Pathways in cancer"]	CUL2	Homo sapiens (Human)-&&-9606	taxon:9606	["Gene Symbol-&-1&-CUL2"]	[""]	FALSE	193	703.502	193
HNRNPA0	HNRNPA0	G:9606:HNRNPA0	174518	1902	heterogeneous nuclear ribonucleoprotein A0	gene	["biological_process-&-1&-GO:0000398-&&-mRNA splicing, via spliceosome-%%-GO:0006397-&&-mRNA processing-%%-GO:0006954-&&-inflammatory response-%%-GO:0010467-&&-gene expression-%%-GO:0032496-&&-response to lipopolysaccharide-%%-GO:0070935-&&-3'-UTR-mediated mRNA stabilization","cellular_component-&-1&-GO:0030529-&&-intracellular ribonucleoprotein complex-%%-GO:0005634-&&-nucleus-%%-GO:0005654-&&-n…	[""]	HNRNPA0	Homo sapiens (Human)-&&-9606	taxon:9606	["Gene Symbol-&-1&-HNRNPA0"]	[""]	FALSE	54	54
PTGIS	PTGIS	G:9606:PTGIS	178615	1902	prostaglandin I2 synthase	gene	["biological_process-&-1&-GO:0001516-&&-prostaglandin biosynthetic process-%%-GO:0055114-&&-oxidation-reduction process-%%-GO:0006690-&&-icosanoid metabolic process-%%-GO:0007566-&&-embryo implantation-%%-GO:0019371-&&-cyclooxygenase pathway-%%-GO:0032088-&&-negative regulation of NF-kappaB transcription factor activity-%%-GO:0034356-&&-NAD biosynthesis via nicotinamide riboside salvage pathway-%…	["KEGG-&-1&-hsa01100-&&-Metabolic pathways-%%-hsa00590-&&-Arachidonic acid metabolism"]	PTGIS	Homo sapiens (Human)-&&-9606	taxon:9606	["Gene Symbol-&-1&-PTGIS"]	[""]	FALSE	4	4
DSEL	DSEL	G:9606:DSEL	166327	1902	dermatan sulfate epimerase-like	gene	["biological_process-&-1&-GO:0030204-&&-chondroitin sulfate metabolic process-%%-GO:0030208-&&-dermatan sulfate biosynthetic process","cellular_component-&-1&-GO:0000139-&&-Golgi membrane-%%-GO:0016021-&&-integral component of membrane","molecular_function-&-1&-GO:0008146-&&-sulfotransferase activity-%%-GO:0047757-&&-chondroitin-glucuronate 5-epimerase activity"]	[""]	DSEL	Homo sapiens (Human)-&&-9606	taxon:9606	["Gene Symbol-&-1&-DSEL"]	[""]	FALSE	1	1
PTGS2	PTGS2	G:9606:PTGS2	178612	1902	prostaglandin-endoperoxide synthase 2	gene	["biological_process-&-1&-GO:0001516-&&-prostaglandin biosynthetic process-%%-GO:0001525-&&-angiogenesis-%%-GO:0055114-&&-oxidation-reduction process-%%-GO:0006693-&&-prostaglandin metabolic process-%%-GO:0006928-&&-movement of cell or subcellular component-%%-GO:0006954-&&-inflammatory response-%%-GO:0006979-&&-response to oxidative stress-%%-GO:0007566-&&-embryo implantation-%%-GO:0007568-&&-ag…	["KEGG-&-1&-hsa04064-&&-NF-kappa B signaling pathway-%%-hsa04657-&&-IL-17 signaling pathway-%%-hsa05165-&&-Human papillomavirus infection-%%-hsa04370-&&-VEGF signaling pathway-%%-hsa05200-&&-Pathways in cancer-%%-hsa05204-&&-Chemical carcinogenesis-%%-hsa00590-&&-Arachidonic acid metabolism-%%-hsa05163-&&-Human cytomegalovirus infection-%%-hsa04921-&&-Oxytocin signaling pathway-%%-hsa04668-&&-TNF…	PTGS2	Homo sapiens (Human)-&&-9606	taxon:9606	["Gene Symbol-&-1&-PTGS2"]	[""]	FALSE	15	15
PTGS1	PTGS1	G:9606:PTGS1	178613	1902	prostaglandin-endoperoxide synthase 1	gene	["biological_process-&-1&-GO:0001516-&&-prostaglandin biosynthetic process-%%-GO:0055114-&&-oxidation-reduction process-%%-GO:0006629-&&-lipid metabolic process-%%-GO:0006805-&&-xenobiotic metabolic process-%%-GO:0006954-&&-inflammatory response-%%-GO:0006979-&&-response to oxidative stress-%%-GO:0008217-&&-regulation of blood pressure-%%-GO:0019371-&&-cyclooxygenase pathway-%%-GO:0042127-&&-regu…	["KEGG-&-1&-hsa04611-&&-Platelet activation-%%-hsa04923-&&-Regulation of lipolysis in adipocytes-%%-hsa01100-&&-Metabolic pathways-%%-hsa04726-&&-Serotonergic synapse-%%-hsa00590-&&-Arachidonic acid metabolism"]	PTGS1	Homo sapiens (Human)-&&-9606	taxon:9606	["Gene Symbol-&-1&-PTGS1"]	[""]	FALSE	5	5
GJB2	GJB2	G:9606:GJB2	180670	1902	gap junction protein beta 2	gene	["biological_process-&-1&-GO:0002931-&&-response to ischemia-%%-GO:0007267-&&-cell-cell signaling-%%-GO:0006810-&&-transport-%%-GO:0007568-&&-aging-%%-GO:0007605-&&-sensory perception of sound-%%-GO:0016264-&&-gap junction assembly-%%-GO:0046677-&&-response to antibiotic-%%-GO:0030539-&&-male genitalia development-%%-GO:0032355-&&-response to estradiol-%%-GO:0032496-&&-response to lipopolysacchar…	[""]	GJB2	Homo sapiens (Human)-&&-9606	taxon:9606	["Gene Symbol-&-1&-GJB2"]	[""]	FALSE	7	7
GJB1	GJB1	G:9606:GJB1	180671	1902	gap junction protein beta 1	gene	["biological_process-&-1&-GO:0007267-&&-cell-cell signaling-%%-GO:0006810-&&-transport-%%-GO:0007399-&&-nervous system development-%%-GO:0015868-&&-purine ribonucleotide transport-%%-GO:0016264-&&-gap junction assembly-%%-GO:0051259-&&-protein oligomerization-%%-GO:0055085-&&-transmembrane transport","cellular_component-&-1&-GO:0016021-&&-integral component of membrane-%%-GO:0005789-&&-endoplasmi…	[""]	GJB1	Homo sapiens (Human)-&&-9606	taxon:9606	["Gene Symbol-&-1&-GJB1"]	[""]	FALSE	7	7
BLVRB	BLVRB	G:9606:BLVRB	182716	1902	biliverdin reductase B	gene	["biological_process-&-1&-GO:0055114-&&-oxidation-reduction process-%%-GO:0042167-&&-heme catabolic process","cellular_component-&-1&-GO:0005886-&&-plasma membrane-%%-GO:0005829-&&-cytosol-%%-GO:0005654-&&-nucleoplasm-%%-GO:0043195-&&-terminal bouton-%%-GO:0070062-&&-extracellular exosome","molecular_function-&-1&-GO:0004074-&&-biliverdin reductase activity-%%-GO:0042602-&&-riboflavin reductase (…	["KEGG-&-1&-hsa00860-&&-Porphyrin and chlorophyll metabolism-%%-hsa00740-&&-Riboflavin metabolism-%%-hsa01100-&&-Metabolic pathways"]	BLVRB	Homo sapiens (Human)-&&-9606	taxon:9606	["Gene Symbol-&-1&-BLVRB"]	[""]	FALSE	4	4
PRDX3	PRDX3	G:9606:PRDX3	174531	1902	peroxiredoxin 3	gene	["biological_process-&-1&-GO:0000302-&&-response to reactive oxygen species-%%-GO:0001893-&&-maternal placenta development-%%-GO:0006915-&&-apoptotic process-%%-GO:0045454-&&-cell redox homeostasis-%%-GO:0006979-&&-response to oxidative stress-%%-GO:0007005-&&-mitochondrion organization-%%-GO:0043066-&&-negative regulation of apoptotic process-%%-GO:0008284-&&-positive regulation of cell prolifer…	[""]	PRDX3	Homo sapiens (Human)-&&-9606	taxon:9606	["Gene Symbol-&-1&-PRDX3"]	[""]	FALSE	18	18
PTEN	PTEN	G:9606:PTEN	178627	1902	phosphatase and tensin homolog	gene	["biological_process-&-1&-GO:0000079-&&-regulation of cyclin-dependent protein serine/threonine kinase activity-%%-GO:0001525-&&-angiogenesis-%%-GO:0001933-&&-negative regulation of protein phosphorylation-%%-GO:0002902-&&-regulation of B cell apoptotic process-%%-GO:0006915-&&-apoptotic process-%%-GO:0006470-&&-protein dephosphorylation-%%-GO:0006661-&&-phosphatidylinositol biosynthetic process-…	["KEGG-&-1&-hsa04510-&&-Focal adhesion-%%-hsa04068-&&-FoxO signaling pathway-%%-hsa01521-&&-EGFR tyrosine kinase inhibitor resistance-%%-hsa04218-&&-Cellular senescence-%%-hsa04070-&&-Phosphatidylinositol signaling system-%%-hsa04115-&&-p53 signaling pathway-%%-hsa05166-&&-Human T-cell leukemia virus 1 infection-%%-hsa05206-&&-MicroRNAs in cancer-%%-hsa04151-&&-PI3K-Akt signaling pathway-%%-hsa05…	PTEN	Homo sapiens (Human)-&&-9606	taxon:9606	["Gene Symbol-&-1&-PTEN"]	[""]	FALSE	99	162.094	99
GJA3	GJA3	G:9606:GJA3	180675	1902	gap junction protein alpha 3	gene	["biological_process-&-1&-GO:0007267-&&-cell-cell signaling-%%-GO:0006810-&&-transport-%%-GO:0007601-&&-visual perception-%%-GO:0055085-&&-transmembrane transport","cellular_component-&-1&-GO:0016021-&&-integral component of membrane-%%-GO:0005922-&&-connexin complex","molecular_function-&-1&-GO:0005243-&&-gap junction channel activity"]	[""]	GJA3	Homo sapiens (Human)-&&-9606	taxon:9606	["Gene Symbol-&-1&-GJA3"]	[""]	FALSE	3	3
PTGER1	PTGER1	G:9606:PTGER1	178624	1902	prostaglandin E receptor 1	gene	["biological_process-&-1&-GO:0007186-&&-G-protein coupled receptor signaling pathway-%%-GO:0032496-&&-response to lipopolysaccharide","cellular_component-&-1&-GO:0005886-&&-plasma membrane-%%-GO:0005887-&&-integral component of plasma membrane","molecular_function-&-1&-GO:0004957-&&-prostaglandin E receptor activity"]	["KEGG-&-1&-hsa05163-&&-Human cytomegalovirus infection-%%-hsa04020-&&-Calcium signaling pathway-%%-hsa04080-&&-Neuroactive ligand-receptor interaction-%%-hsa05200-&&-Pathways in cancer"]	PTGER1	Homo sapiens (Human)-&&-9606	taxon:9606	["Gene Symbol-&-1&-PTGER1"]	[""]	FALSE	1	1
PTBP1	PTBP1	G:9606:PTBP1	178630	1902	polypyrimidine tract binding protein 1	gene	["biological_process-&-1&-GO:0000380-&&-alternative mRNA splicing, via spliceosome-%%-GO:0000381-&&-regulation of alternative mRNA splicing, via spliceosome-%%-GO:0000398-&&-mRNA splicing, via spliceosome-%%-GO:0006397-&&-mRNA processing-%%-GO:0008380-&&-RNA splicing-%%-GO:0008543-&&-fibroblast growth factor receptor signaling pathway-%%-GO:0010467-&&-gene expression-%%-GO:0033119-&&-negative reg…	[""]	PTBP1	Homo sapiens (Human)-&&-9606	taxon:9606	["Gene Symbol-&-1&-PTBP1"]	[""]	FALSE	68	40.6417	68
CEACAM1	CEACAM1	G:9606:CEACAM1	182727	1902	carcinoembryonic antigen related cell adhesion molecule 1	gene	["biological_process-&-1&-GO:0001525-&&-angiogenesis-%%-GO:0001558-&&-regulation of cell growth-%%-GO:0001568-&&-blood vessel development-%%-GO:0001915-&&-negative regulation of T cell mediated cytotoxicity-%%-GO:0002859-&&-negative regulation of natural killer cell mediated cytotoxicity directed against tumor cell target-%%-GO:0007155-&&-cell adhesion-%%-GO:0006469-&&-negative regulation of prot…	[""]	CEACAM1	Homo sapiens (Human)-&&-9606	taxon:9606	["Gene Symbol-&-1&-CEACAM1"]	[""]	FALSE	8	8
ARRDC4	ARRDC4	G:9606:ARRDC4	166343	1902	arrestin domain containing 4	gene	["biological_process-&-1&-GO:0051443-&&-positive regulation of ubiquitin-protein transferase activity","cellular_component-&-1&-GO:0005886-&&-plasma membrane-%%-GO:0005768-&&-endosome-%%-GO:0005769-&&-early endosome","molecular_function-&-1&-GO:0005515-&&-protein binding"]	[""]	ARRDC4	Homo sapiens (Human)-&&-9606	taxon:9606	["Gene Symbol-&-1&-ARRDC4"]	[""]	FALSE	6	6
RECK	RECK	G:9606:RECK	176583	1902	reversion inducing cysteine rich protein with kazal motifs	gene	["biological_process-&-1&-GO:0001955-&&-blood vessel maturation-%%-GO:0006501-&&-C-terminal protein lipidation-%%-GO:0007566-&&-embryo implantation-%%-GO:0030198-&&-extracellular matrix organization-%%-GO:0030336-&&-negative regulation of cell migration-%%-GO:0035115-&&-embryonic forelimb morphogenesis-%%-GO:1904684-&&-negative regulation of metalloendopeptidase activity","cellular_component-&-1&…	["KEGG-&-1&-hsa05206-&&-MicroRNAs in cancer"]	RECK	Homo sapiens (Human)-&&-9606	taxon:9606	["Gene Symbol-&-1&-RECK"]	[""]	FALSE	6	6
PTCH1	PTCH1	G:9606:PTCH1	178628	1902	patched 1	gene	["biological_process-&-1&-GO:0000122-&&-negative regulation of transcription from RNA polymerase II promoter-%%-GO:0001658-&&-branching involved in ureteric bud morphogenesis-%%-GO:0001701-&&-in utero embryonic development-%%-GO:0001709-&&-cell fate determination-%%-GO:0001843-&&-neural tube closure-%%-GO:0003007-&&-heart morphogenesis-%%-GO:0016485-&&-protein processing-%%-GO:0009612-&&-response…	["KEGG-&-1&-hsa04024-&&-cAMP signaling pathway-%%-hsa04360-&&-Axon guidance-%%-hsa04340-&&-Hedgehog signaling pathway-%%-hsa05200-&&-Pathways in cancer-%%-hsa05205-&&-Proteoglycans in cancer-%%-hsa05217-&&-Basal cell carcinoma"]	PTCH1	Homo sapiens (Human)-&&-9606	taxon:9606	["Gene Symbol-&-1&-PTCH1"]	[""]	FALSE	14	14
BID	BID	G:9606:BID	182724	1902	BH3 interacting domain death agonist	gene	["biological_process-&-1&-GO:0001836-&&-release of cytochrome c from mitochondria-%%-GO:0006626-&&-protein targeting to mitochondrion-%%-GO:0006919-&&-activation of cysteine-type endopeptidase activity involved in apoptotic process-%%-GO:0007420-&&-brain development-%%-GO:0008625-&&-extrinsic apoptotic signaling pathway via death domain receptors-%%-GO:0008637-&&-apoptotic mitochondrial changes-%…	["KEGG-&-1&-hsa04071-&&-Sphingolipid signaling pathway-%%-hsa05161-&&-Hepatitis B-%%-hsa04210-&&-Apoptosis-%%-hsa05169-&&-Epstein-Barr virus infection-%%-hsa05200-&&-Pathways in cancer-%%-hsa05152-&&-Tuberculosis-%%-hsa05160-&&-Hepatitis C-%%-hsa05163-&&-Human cytomegalovirus infection-%%-hsa04115-&&-p53 signaling pathway-%%-hsa04215-&&-Apoptosis - multiple species-%%-hsa05010-&&-Alzheimer diseas…	BID	Homo sapiens (Human)-&&-9606	taxon:9606	["Gene Symbol-&-1&-BID"]	[""]	FALSE	25	25
SDPR	SDPR	G:9606:SDPR	176581	1902	serum deprivation response	gene	["cellular_component-&-1&-GO:0005829-&&-cytosol-%%-GO:0005737-&&-cytoplasm-%%-GO:0005901-&&-caveola-%%-GO:0045121-&&-membrane raft","molecular_function-&-1&-GO:0005515-&&-protein binding-%%-GO:0001786-&&-phosphatidylserine binding-%%-GO:0005080-&&-protein kinase C binding-%%-GO:0005543-&&-phospholipid binding"]	[""]	SDPR	Homo sapiens (Human)-&&-9606	taxon:9606	["Gene Symbol-&-1&-SDPR"]	[""]	FALSE	5	5
GJA1	GJA1	G:9606:GJA1	180677	1902	gap junction protein alpha 1	gene	["biological_process-&-1&-GO:0001937-&&-negative regulation of endothelial cell proliferation-%%-GO:0002544-&&-chronic inflammatory response-%%-GO:0002931-&&-response to ischemia-%%-GO:0007267-&&-cell-cell signaling-%%-GO:0003104-&&-positive regulation of glomerular filtration-%%-GO:0003158-&&-endothelium development-%%-GO:0006936-&&-muscle contraction-%%-GO:0006915-&&-apoptotic process-%%-GO:000…	["KEGG-&-1&-hsa04540-&&-Gap junction-%%-hsa05412-&&-Arrhythmogenic right ventricular cardiomyopathy (ARVC)"]	GJA1	Homo sapiens (Human)-&&-9606	taxon:9606	["Gene Symbol-&-1&-GJA1"]	[""]	FALSE	13	13
NR0B2	NR0B2	G:9606:NR0B2	176585	1902	nuclear receptor subfamily 0 group B member 2	gene	["biological_process-&-1&-GO:0000122-&&-negative regulation of transcription from RNA polymerase II promoter-%%-GO:0006367-&&-transcription initiation from RNA polymerase II promoter-%%-GO:0007219-&&-Notch signaling pathway-%%-GO:0008203-&&-cholesterol metabolic process-%%-GO:0009749-&&-response to glucose-%%-GO:0010628-&&-positive regulation of gene expression-%%-GO:0010629-&&-negative regulatio…	["KEGG-&-1&-hsa04976-&&-Bile secretion"]	NR0B2	Homo sapiens (Human)-&&-9606	taxon:9606	["Gene Symbol-&-1&-NR0B2"]	[""]	FALSE	17	17
LRP1B	LRP1B	G:9606:LRP1B	170441	1902	LDL receptor related protein 1B	gene	["biological_process-&-1&-GO:0006898-&&-receptor-mediated endocytosis-%%-GO:0015031-&&-protein transport","cellular_component-&-1&-GO:0016021-&&-integral component of membrane-%%-GO:0043235-&&-receptor complex","molecular_function-&-1&-GO:0005509-&&-calcium ion binding"]	[""]	LRP1B	Homo sapiens (Human)-&&-9606	taxon:9606	["Gene Symbol-&-1&-LRP1B"]	[""]	FALSE	6	6
PSMD11	PSMD11	G:9606:PSMD11	178637	1902	proteasome 26S subunit, non-ATPase 11	gene	["biological_process-&-1&-GO:0000165-&&-MAPK cascade-%%-GO:0000209-&&-protein polyubiquitination-%%-GO:0002223-&&-stimulatory C-type lectin receptor signaling pathway-%%-GO:0002479-&&-antigen processing and presentation of exogenous peptide antigen via MHC class I, TAP-dependent-%%-GO:0006511-&&-ubiquitin-dependent protein catabolic process-%%-GO:0006521-&&-regulation of cellular amino acid metab…	["KEGG-&-1&-hsa03050-&&-Proteasome-%%-hsa05169-&&-Epstein-Barr virus infection"]	PSMD11	Homo sapiens (Human)-&&-9606	taxon:9606	["Gene Symbol-&-1&-PSMD11"]	[""]	FALSE	43	43
PSMD1	PSMD1	G:9606:PSMD1	178646	1902	proteasome 26S subunit, non-ATPase 1	gene	["biological_process-&-1&-GO:0000165-&&-MAPK cascade-%%-GO:0000209-&&-protein polyubiquitination-%%-GO:0002223-&&-stimulatory C-type lectin receptor signaling pathway-%%-GO:0002479-&&-antigen processing and presentation of exogenous peptide antigen via MHC class I, TAP-dependent-%%-GO:0006521-&&-regulation of cellular amino acid metabolic process-%%-GO:0010972-&&-negative regulation of G2/M trans…	["KEGG-&-1&-hsa03050-&&-Proteasome-%%-hsa05169-&&-Epstein-Barr virus infection"]	PSMD1	Homo sapiens (Human)-&&-9606	taxon:9606	["Gene Symbol-&-1&-PSMD1"]	[""]	FALSE	45	45
GADD45G	GADD45G	G:9606:GADD45G	174550	1902	growth arrest and DNA damage inducible gamma	gene	["biological_process-&-1&-GO:0000185-&&-activation of MAPKKK activity-%%-GO:0051726-&&-regulation of cell cycle-%%-GO:0006915-&&-apoptotic process-%%-GO:0006950-&&-response to stress-%%-GO:0007275-&&-multicellular organism development-%%-GO:0030154-&&-cell differentiation-%%-GO:0043065-&&-positive regulation of apoptotic process-%%-GO:0046330-&&-positive regulation of JNK cascade-%%-GO:1900745-&&…	["KEGG-&-1&-hsa05216-&&-Thyroid cancer-%%-hsa05224-&&-Breast cancer-%%-hsa04068-&&-FoxO signaling pathway-%%-hsa04218-&&-Cellular senescence-%%-hsa05212-&&-Pancreatic cancer-%%-hsa04210-&&-Apoptosis-%%-hsa05220-&&-Chronic myeloid leukemia-%%-hsa04010-&&-MAPK signaling pathway-%%-hsa05223-&&-Non-small cell lung cancer-%%-hsa05169-&&-Epstein-Barr virus infection-%%-hsa05200-&&-Pathways in cancer-%%…	GADD45G	Homo sapiens (Human)-&&-9606	taxon:9606	["Gene Symbol-&-1&-GADD45G"]	[""]	FALSE	19	19
PSMD3	PSMD3	G:9606:PSMD3	178644	1902	proteasome 26S subunit, non-ATPase 3	gene	["biological_process-&-1&-GO:0000165-&&-MAPK cascade-%%-GO:0000209-&&-protein polyubiquitination-%%-GO:0002223-&&-stimulatory C-type lectin receptor signaling pathway-%%-GO:0002479-&&-antigen processing and presentation of exogenous peptide antigen via MHC class I, TAP-dependent-%%-GO:0006511-&&-ubiquitin-dependent protein catabolic process-%%-GO:0006521-&&-regulation of cellular amino acid metab…	["KEGG-&-1&-hsa03050-&&-Proteasome-%%-hsa05169-&&-Epstein-Barr virus infection"]	PSMD3	Homo sapiens (Human)-&&-9606	taxon:9606	["Gene Symbol-&-1&-PSMD3"]	[""]	FALSE	38	38
GGCX	GGCX	G:9606:GGCX	180693	1902	gamma-glutamyl carboxylase	gene	["biological_process-&-1&-GO:0007596-&&-blood coagulation-%%-GO:0006464-&&-cellular protein modification process-%%-GO:0017187-&&-peptidyl-glutamic acid carboxylation","cellular_component-&-1&-GO:0016021-&&-integral component of membrane-%%-GO:0016020-&&-membrane-%%-GO:0005789-&&-endoplasmic reticulum membrane","molecular_function-&-1&-GO:0008488-&&-gamma-glutamyl carboxylase activity"]	["KEGG-&-1&-hsa00130-&&-Ubiquinone and other terpenoid-quinone biosynthesis-%%-hsa01100-&&-Metabolic pathways"]	GGCX	Homo sapiens (Human)-&&-9606	taxon:9606	["Gene Symbol-&-1&-GGCX"]	[""]	FALSE	5	5
PSMD2	PSMD2	G:9606:PSMD2	178645	1902	proteasome 26S subunit, non-ATPase 2	gene	["biological_process-&-1&-GO:0000165-&&-MAPK cascade-%%-GO:0000209-&&-protein polyubiquitination-%%-GO:0002223-&&-stimulatory C-type lectin receptor signaling pathway-%%-GO:0002479-&&-antigen processing and presentation of exogenous peptide antigen via MHC class I, TAP-dependent-%%-GO:0006521-&&-regulation of cellular amino acid metabolic process-%%-GO:0010972-&&-negative regulation of G2/M trans…	["KEGG-&-1&-hsa03050-&&-Proteasome-%%-hsa05169-&&-Epstein-Barr virus infection"]	PSMD2	Homo sapiens (Human)-&&-9606	taxon:9606	["Gene Symbol-&-1&-PSMD2"]	[""]	FALSE	60	60
PSMC5	PSMC5	G:9606:PSMC5	178648	1902	proteasome 26S subunit, ATPase 5	gene	["biological_process-&-1&-GO:0000165-&&-MAPK cascade-%%-GO:0000209-&&-protein polyubiquitination-%%-GO:0002223-&&-stimulatory C-type lectin receptor signaling pathway-%%-GO:0002479-&&-antigen processing and presentation of exogenous peptide antigen via MHC class I, TAP-dependent-%%-GO:0006366-&&-transcription from RNA polymerase II promoter-%%-GO:0006521-&&-regulation of cellular amino acid metab…	["KEGG-&-1&-hsa03050-&&-Proteasome-%%-hsa05169-&&-Epstein-Barr virus infection"]	PSMC5	Homo sapiens (Human)-&&-9606	taxon:9606	["Gene Symbol-&-1&-PSMC5"]	[""]	FALSE	52	52
TAGLN2	TAGLN2	G:9606:TAGLN2	176601	1902	transgelin 2	gene	["biological_process-&-1&-GO:0002576-&&-platelet degranulation-%%-GO:0030855-&&-epithelial cell differentiation","cellular_component-&-1&-GO:0005576-&&-extracellular region-%%-GO:0005829-&&-cytosol-%%-GO:0031982-&&-vesicle-%%-GO:0070062-&&-extracellular exosome","molecular_function-&-1&-GO:0005515-&&-protein binding-%%-GO:0045296-&&-cadherin binding"]	[""]	TAGLN2	Homo sapiens (Human)-&&-9606	taxon:9606	["Gene Symbol-&-1&-TAGLN2"]	[""]	FALSE	42	42
ZNF804A	ZNF804A	G:9606:ZNF804A	166361	1902	zinc finger protein 804A	gene	["molecular_function-&-1&-GO:0046872-&&-metal ion binding"]	[""]	ZNF804A	Homo sapiens (Human)-&&-9606	taxon:9606	["Gene Symbol-&-1&-ZNF804A"]	[""]	FALSE	1	1
SLC25A11	SLC25A11	G:9606:SLC25A11	176606	1902	solute carrier family 25 member 11	gene	["biological_process-&-1&-GO:0006006-&&-glucose metabolic process-%%-GO:0006094-&&-gluconeogenesis-%%-GO:0006810-&&-transport-%%-GO:0006839-&&-mitochondrial transport-%%-GO:0015742-&&-alpha-ketoglutarate transport","cellular_component-&-1&-GO:0005739-&&-mitochondrion-%%-GO:0005887-&&-integral component of plasma membrane-%%-GO:0005634-&&-nucleus-%%-GO:0005743-&&-mitochondrial inner membrane","mol…	[""]	SLC25A11	Homo sapiens (Human)-&&-9606	taxon:9606	["Gene Symbol-&-1&-SLC25A11"]	[""]	FALSE	16	16
BRD8	BRD8	G:9606:BRD8	174559	1902	bromodomain containing 8	gene	["biological_process-&-1&-GO:0007165-&&-signal transduction-%%-GO:0006351-&&-transcription, DNA-templated-%%-GO:0006355-&&-regulation of transcription, DNA-templated-%%-GO:0006357-&&-regulation of transcription from RNA polymerase II promoter-%%-GO:0007166-&&-cell surface receptor signaling pathway-%%-GO:0030522-&&-intracellular receptor signaling pathway-%%-GO:0040008-&&-regulation of growth-%%-…	[""]	BRD8	Homo sapiens (Human)-&&-9606	taxon:9606	["Gene Symbol-&-1&-BRD8"]	[""]	FALSE	12	12
TMEM33	TMEM33	G:9606:TMEM33	170466	1902	transmembrane protein 33	gene	["biological_process-&-1&-GO:0008150-&&-biological_process-%%-GO:0034613-&&-cellular protein localization-%%-GO:0034976-&&-response to endoplasmic reticulum stress-%%-GO:0051292-&&-nuclear pore complex assembly-%%-GO:1903371-&&-regulation of endoplasmic reticulum tubular network organization-%%-GO:1903896-&&-positive regulation of IRE1-mediated unfolded protein response-%%-GO:1903899-&&-positive …	[""]	TMEM33	Homo sapiens (Human)-&&-9606	taxon:9606	["Gene Symbol-&-1&-TMEM33"]	[""]	FALSE	10	10
PSMB6	PSMB6	G:9606:PSMB6	178659	1902	proteasome subunit beta 6	gene	["biological_process-&-1&-GO:0000165-&&-MAPK cascade-%%-GO:0000209-&&-protein polyubiquitination-%%-GO:0002223-&&-stimulatory C-type lectin receptor signaling pathway-%%-GO:0002479-&&-antigen processing and presentation of exogenous peptide antigen via MHC class I, TAP-dependent-%%-GO:0006521-&&-regulation of cellular amino acid metabolic process-%%-GO:0016032-&&-viral process-%%-GO:0010972-&&-ne…	["KEGG-&-1&-hsa03050-&&-Proteasome"]	PSMB6	Homo sapiens (Human)-&&-9606	taxon:9606	["Gene Symbol-&-1&-PSMB6"]	[""]	FALSE	24	24
PSMB2	PSMB2	G:9606:PSMB2	178663	1902	proteasome subunit beta 2	gene	["biological_process-&-1&-GO:0000165-&&-MAPK cascade-%%-GO:0000209-&&-protein polyubiquitination-%%-GO:0002223-&&-stimulatory C-type lectin receptor signaling pathway-%%-GO:0002479-&&-antigen processing and presentation of exogenous peptide antigen via MHC class I, TAP-dependent-%%-GO:0006521-&&-regulation of cellular amino acid metabolic process-%%-GO:0016032-&&-viral process-%%-GO:0010243-&&-re…	["KEGG-&-1&-hsa03050-&&-Proteasome"]	PSMB2	Homo sapiens (Human)-&&-9606	taxon:9606	["Gene Symbol-&-1&-PSMB2"]	[""]	FALSE	26	26
APOE	APOE	G:9606:APOE	182759	1902	apolipoprotein E	gene	["biological_process-&-1&-GO:0000302-&&-response to reactive oxygen species-%%-GO:0001523-&&-retinoid metabolic process-%%-GO:0001937-&&-negative regulation of endothelial cell proliferation-%%-GO:0002021-&&-response to dietary excess-%%-GO:0007010-&&-cytoskeleton organization-%%-GO:0006357-&&-regulation of transcription from RNA polymerase II promoter-%%-GO:0006641-&&-triglyceride metabolic proc…	["KEGG-&-1&-hsa04979-&&-Cholesterol metabolism-%%-hsa05010-&&-Alzheimer disease"]	APOE	Homo sapiens (Human)-&&-9606	taxon:9606	["Gene Symbol-&-1&-APOE"]	[""]	FALSE	15	15
LYVE1	LYVE1	G:9606:LYVE1	174567	1902	lymphatic vessel endothelial hyaluronan receptor 1	gene	["biological_process-&-1&-GO:0007165-&&-signal transduction-%%-GO:0006810-&&-transport-%%-GO:0006928-&&-movement of cell or subcellular component-%%-GO:0007160-&&-cell-matrix adhesion-%%-GO:0009653-&&-anatomical structure morphogenesis-%%-GO:0009611-&&-response to wounding-%%-GO:0030214-&&-hyaluronan catabolic process","cellular_component-&-1&-GO:0005886-&&-plasma membrane-%%-GO:0016020-&&-membra…	[""]	LYVE1	Homo sapiens (Human)-&&-9606	taxon:9606	["Gene Symbol-&-1&-LYVE1"]	[""]	FALSE	1	1
LRRC4	LRRC4	G:9606:LRRC4	168423	1902	leucine rich repeat containing 4	gene	["biological_process-&-1&-GO:0006469-&&-negative regulation of protein kinase activity-%%-GO:0019221-&&-cytokine-mediated signaling pathway-%%-GO:0046426-&&-negative regulation of JAK-STAT cascade-%%-GO:0050807-&&-regulation of synapse organization-%%-GO:0097119-&&-postsynaptic density protein 95 clustering","cellular_component-&-1&-GO:0016021-&&-integral component of membrane-%%-GO:0005737-&&-cy…	["KEGG-&-1&-hsa04514-&&-Cell adhesion molecules (CAMs)-%%-hsa04360-&&-Axon guidance"]	LRRC4	Homo sapiens (Human)-&&-9606	taxon:9606	["Gene Symbol-&-1&-LRRC4"]	[""]	FALSE	1	1
APRT	APRT	G:9606:APRT	182756	1902	adenine phosphoribosyltransferase	gene	["biological_process-&-1&-GO:0006168-&&-adenine salvage-%%-GO:0007595-&&-lactation-%%-GO:0007625-&&-grooming behavior-%%-GO:0032869-&&-cellular response to insulin stimulus-%%-GO:0043101-&&-purine-containing compound salvage-%%-GO:0043312-&&-neutrophil degranulation-%%-GO:0044209-&&-AMP salvage","cellular_component-&-1&-GO:0005576-&&-extracellular region-%%-GO:0005829-&&-cytosol-%%-GO:0005737-&&-…	["KEGG-&-1&-hsa00230-&&-Purine metabolism-%%-hsa01100-&&-Metabolic pathways"]	APRT	Homo sapiens (Human)-&&-9606	taxon:9606	["Gene Symbol-&-1&-APRT"]	[""]	FALSE	17	17
APP	APP	G:9606:APP	182757	1902	amyloid beta precursor protein	gene	["biological_process-&-1&-GO:0001934-&&-positive regulation of protein phosphorylation-%%-GO:0001967-&&-suckling behavior-%%-GO:0002576-&&-platelet degranulation-%%-GO:0007155-&&-cell adhesion-%%-GO:0006378-&&-mRNA polyadenylation-%%-GO:0006417-&&-regulation of translation-%%-GO:0006468-&&-protein phosphorylation-%%-GO:0006878-&&-cellular copper ion homeostasis-%%-GO:0006897-&&-endocytosis-%%-GO:…	["KEGG-&-1&-hsa05010-&&-Alzheimer disease-%%-hsa04726-&&-Serotonergic synapse"]	APP	Homo sapiens (Human)-&&-9606	taxon:9606	["Gene Symbol-&-1&-APP"]	[""]	FALSE	271	484.354	271
PPARGC1A	PPARGC1A	G:9606:PPARGC1A	174570	1902	PPARG coactivator 1 alpha	gene	["biological_process-&-1&-GO:0000302-&&-response to reactive oxygen species-%%-GO:0000422-&&-mitophagy-%%-GO:0001659-&&-temperature homeostasis-%%-GO:0001678-&&-cellular glucose homeostasis-%%-GO:0001933-&&-negative regulation of protein phosphorylation-%%-GO:0002021-&&-response to dietary excess-%%-GO:0002931-&&-response to ischemia-%%-GO:0006012-&&-galactose metabolic process-%%-GO:0006094-&&-g…	["KEGG-&-1&-hsa04931-&&-Insulin resistance-%%-hsa04922-&&-Glucagon signaling pathway-%%-hsa05016-&&-Huntington disease-%%-hsa04211-&&-Longevity regulating pathway-%%-hsa04152-&&-AMPK signaling pathway-%%-hsa04910-&&-Insulin signaling pathway-%%-hsa04920-&&-Adipocytokine signaling pathway-%%-hsa04714-&&-Thermogenesis-%%-hsa04371-&&-Apelin signaling pathway"]	PPARGC1A	Homo sapiens (Human)-&&-9606	taxon:9606	["Gene Symbol-&-1&-PPARGC1A"]	[""]	FALSE	31	31
PSMA6	PSMA6	G:9606:PSMA6	178666	1902	proteasome subunit alpha 6	gene	["biological_process-&-1&-GO:0000165-&&-MAPK cascade-%%-GO:0000209-&&-protein polyubiquitination-%%-GO:0002223-&&-stimulatory C-type lectin receptor signaling pathway-%%-GO:0002479-&&-antigen processing and presentation of exogenous peptide antigen via MHC class I, TAP-dependent-%%-GO:0051603-&&-proteolysis involved in cellular protein catabolic process-%%-GO:0006521-&&-regulation of cellular ami…	["KEGG-&-1&-hsa03050-&&-Proteasome"]	PSMA6	Homo sapiens (Human)-&&-9606	taxon:9606	["Gene Symbol-&-1&-PSMA6"]	[""]	FALSE	48	48
PSMA5	PSMA5	G:9606:PSMA5	178667	1902	proteasome subunit alpha 5	gene	["biological_process-&-1&-GO:0000165-&&-MAPK cascade-%%-GO:0000209-&&-protein polyubiquitination-%%-GO:0002223-&&-stimulatory C-type lectin receptor signaling pathway-%%-GO:0002479-&&-antigen processing and presentation of exogenous peptide antigen via MHC class I, TAP-dependent-%%-GO:0006521-&&-regulation of cellular amino acid metabolic process-%%-GO:0010972-&&-negative regulation of G2/M trans…	["KEGG-&-1&-hsa03050-&&-Proteasome"]	PSMA5	Homo sapiens (Human)-&&-9606	taxon:9606	["Gene Symbol-&-1&-PSMA5"]	[""]	FALSE	39	39
PSMB1	PSMB1	G:9606:PSMB1	178664	1902	proteasome subunit beta 1	gene	["biological_process-&-1&-GO:0000165-&&-MAPK cascade-%%-GO:0000209-&&-protein polyubiquitination-%%-GO:0002223-&&-stimulatory C-type lectin receptor signaling pathway-%%-GO:0002479-&&-antigen processing and presentation of exogenous peptide antigen via MHC class I, TAP-dependent-%%-GO:0006521-&&-regulation of cellular amino acid metabolic process-%%-GO:0016032-&&-viral process-%%-GO:0010972-&&-ne…	["KEGG-&-1&-hsa03050-&&-Proteasome"]	PSMB1	Homo sapiens (Human)-&&-9606	taxon:9606	["Gene Symbol-&-1&-PSMB1"]	[""]	FALSE	38	38
PSMA7	PSMA7	G:9606:PSMA7	178665	1902	proteasome subunit alpha 7	gene	["biological_process-&-1&-GO:0000165-&&-MAPK cascade-%%-GO:0000209-&&-protein polyubiquitination-%%-GO:0002223-&&-stimulatory C-type lectin receptor signaling pathway-%%-GO:0002479-&&-antigen processing and presentation of exogenous peptide antigen via MHC class I, TAP-dependent-%%-GO:0006521-&&-regulation of cellular amino acid metabolic process-%%-GO:0016032-&&-viral process-%%-GO:0010972-&&-ne…	["KEGG-&-1&-hsa03050-&&-Proteasome"]	PSMA7	Homo sapiens (Human)-&&-9606	taxon:9606	["Gene Symbol-&-1&-PSMA7"]	[""]	FALSE	39	39
ANKRD13A	ANKRD13A	G:9606:ANKRD13A	166377	1902	ankyrin repeat domain 13A	gene	["cellular_component-&-1&-GO:0005886-&&-plasma membrane-%%-GO:0005737-&&-cytoplasm-%%-GO:0005770-&&-late endosome"]	[""]	ANKRD13A	Homo sapiens (Human)-&&-9606	taxon:9606	["Gene Symbol-&-1&-ANKRD13A"]	[""]	FALSE	8	8
KAT2A	KAT2A	G:9606:KAT2A	180717	1902	lysine acetyltransferase 2A	gene	["biological_process-&-1&-GO:0001701-&&-in utero embryonic development-%%-GO:0001756-&&-somitogenesis-%%-GO:0001843-&&-neural tube closure-%%-GO:0006366-&&-transcription from RNA polymerase II promoter-%%-GO:0006338-&&-chromatin remodeling-%%-GO:0006357-&&-regulation of transcription from RNA polymerase II promoter-%%-GO:0008283-&&-cell proliferation-%%-GO:0016032-&&-viral process-%%-GO:0014070-&…	["KEGG-&-1&-hsa05166-&&-Human T-cell leukemia virus 1 infection-%%-hsa04919-&&-Thyroid hormone signaling pathway-%%-hsa05203-&&-Viral carcinogenesis-%%-hsa04330-&&-Notch signaling pathway"]	KAT2A	Homo sapiens (Human)-&&-9606	taxon:9606	["Gene Symbol-&-1&-KAT2A"]	[""]	FALSE	55	55
PSMA3	PSMA3	G:9606:PSMA3	178669	1902	proteasome subunit alpha 3	gene	["biological_process-&-1&-GO:0000165-&&-MAPK cascade-%%-GO:0000209-&&-protein polyubiquitination-%%-GO:0002223-&&-stimulatory C-type lectin receptor signaling pathway-%%-GO:0002479-&&-antigen processing and presentation of exogenous peptide antigen via MHC class I, TAP-dependent-%%-GO:0006521-&&-regulation of cellular amino acid metabolic process-%%-GO:0016032-&&-viral process-%%-GO:0010972-&&-ne…	["KEGG-&-1&-hsa03050-&&-Proteasome"]	PSMA3	Homo sapiens (Human)-&&-9606	taxon:9606	["Gene Symbol-&-1&-PSMA3"]	[""]	FALSE	93	53.4947	93
MCCC2	MCCC2	G:9606:MCCC2	168434	1902	methylcrotonoyl-CoA carboxylase 2	gene	["biological_process-&-1&-GO:0006552-&&-leucine catabolic process-%%-GO:0006768-&&-biotin metabolic process-%%-GO:0009083-&&-branched-chain amino acid catabolic process-%%-GO:0015936-&&-coenzyme A metabolic process-%%-GO:0051291-&&-protein heterooligomerization","cellular_component-&-1&-GO:0002169-&&-3-methylcrotonyl-CoA carboxylase complex, mitochondrial-%%-GO:0005739-&&-mitochondrion-%%-GO:0005…	["KEGG-&-1&-hsa00280-&&-Valine, leucine and isoleucine degradation-%%-hsa01100-&&-Metabolic pathways"]	MCCC2	Homo sapiens (Human)-&&-9606	taxon:9606	["Gene Symbol-&-1&-MCCC2"]	[""]	FALSE	12	12
APOA1	APOA1	G:9606:APOA1	182771	1902	apolipoprotein A1	gene	["biological_process-&-1&-GO:0001523-&&-retinoid metabolic process-%%-GO:0001932-&&-regulation of protein phosphorylation-%%-GO:0001935-&&-endothelial cell proliferation-%%-GO:0002576-&&-platelet degranulation-%%-GO:0002740-&&-negative regulation of cytokine secretion involved in immune response-%%-GO:0006656-&&-phosphatidylcholine biosynthetic process-%%-GO:0006695-&&-cholesterol biosynthetic pr…	["KEGG-&-1&-hsa04979-&&-Cholesterol metabolism-%%-hsa05143-&&-African trypanosomiasis-%%-hsa04977-&&-Vitamin digestion and absorption-%%-hsa03320-&&-PPAR signaling pathway-%%-hsa04975-&&-Fat digestion and absorption"]	APOA1	Homo sapiens (Human)-&&-9606	taxon:9606	["Gene Symbol-&-1&-APOA1"]	[""]	FALSE	19	19
MAD1L1	MAD1L1	G:9606:MAD1L1	176624	1902	MAD1 mitotic arrest deficient like 1	gene	["biological_process-&-1&-GO:0007062-&&-sister chromatid cohesion-%%-GO:0007093-&&-mitotic cell cycle checkpoint-%%-GO:0007094-&&-mitotic spindle assembly checkpoint-%%-GO:0042130-&&-negative regulation of T cell proliferation-%%-GO:0048538-&&-thymus development-%%-GO:0051301-&&-cell division-%%-GO:0051315-&&-attachment of mitotic spindle microtubules to kinetochore-%%-GO:0090235-&&-regulation of…	["KEGG-&-1&-hsa04110-&&-Cell cycle-%%-hsa04914-&&-Progesterone-mediated oocyte maturation-%%-hsa05166-&&-Human T-cell leukemia virus 1 infection-%%-hsa04114-&&-Oocyte meiosis-%%-hsa05203-&&-Viral carcinogenesis"]	MAD1L1	Homo sapiens (Human)-&&-9606	taxon:9606	["Gene Symbol-&-1&-MAD1L1"]	[""]	FALSE	7	7
HIST1H4L	HIST1H4L	G:9606:HIST1H4L	176631	1902	histone cluster 1 H4 family member l	gene	["biological_process-&-1&-GO:0000183-&&-chromatin silencing at rDNA-%%-GO:0006334-&&-nucleosome assembly-%%-GO:0006303-&&-double-strand break repair via nonhomologous end joining-%%-GO:0006335-&&-DNA replication-dependent nucleosome assembly-%%-GO:0006336-&&-DNA replication-independent nucleosome assembly-%%-GO:0006352-&&-DNA-templated transcription, initiation-%%-GO:0016233-&&-telomere capping-%…	["KEGG-&-1&-hsa05322-&&-Systemic lupus erythematosus-%%-hsa05034-&&-Alcoholism-%%-hsa05203-&&-Viral carcinogenesis"]	HIST1H4L	Homo sapiens (Human)-&&-9606	taxon:9606	["Gene Symbol-&-1&-HIST1H4L"]	[""]	FALSE	85	65.4613	85
GCDH	GCDH	G:9606:GCDH	180725	1902	glutaryl-CoA dehydrogenase	gene	["biological_process-&-1&-GO:0006554-&&-lysine catabolic process-%%-GO:0006568-&&-tryptophan metabolic process-%%-GO:0033539-&&-fatty acid beta-oxidation using acyl-CoA dehydrogenase-%%-GO:0046949-&&-fatty-acyl-CoA biosynthetic process","cellular_component-&-1&-GO:0005739-&&-mitochondrion-%%-GO:0005759-&&-mitochondrial matrix","molecular_function-&-1&-GO:0000062-&&-fatty-acyl-CoA binding-%%-GO:00…	["KEGG-&-1&-hsa00380-&&-Tryptophan metabolism-%%-hsa00310-&&-Lysine degradation-%%-hsa00071-&&-Fatty acid degradation-%%-hsa01100-&&-Metabolic pathways"]	GCDH	Homo sapiens (Human)-&&-9606	taxon:9606	["Gene Symbol-&-1&-GCDH"]	[""]	FALSE	6	6
HIST2H4A	HIST2H4A	G:9606:HIST2H4A	176629	1902	histone cluster 2 H4 family member a	gene	["biological_process-&-1&-GO:0000183-&&-chromatin silencing at rDNA-%%-GO:0006334-&&-nucleosome assembly-%%-GO:0006303-&&-double-strand break repair via nonhomologous end joining-%%-GO:0006335-&&-DNA replication-dependent nucleosome assembly-%%-GO:0006336-&&-DNA replication-independent nucleosome assembly-%%-GO:0006352-&&-DNA-templated transcription, initiation-%%-GO:0016233-&&-telomere capping-%…	["KEGG-&-1&-hsa05322-&&-Systemic lupus erythematosus-%%-hsa05203-&&-Viral carcinogenesis-%%-hsa05034-&&-Alcoholism"]	HIST2H4A	Homo sapiens (Human)-&&-9606	taxon:9606	["Gene Symbol-&-1&-HIST2H4A"]	[""]	FALSE	85	65.4613	85
HIST1H4H	HIST1H4H	G:9606:HIST1H4H	176634	1902	histone cluster 1 H4 family member h	gene	["biological_process-&-1&-GO:0000183-&&-chromatin silencing at rDNA-%%-GO:0006334-&&-nucleosome assembly-%%-GO:0006303-&&-double-strand break repair via nonhomologous end joining-%%-GO:0006335-&&-DNA replication-dependent nucleosome assembly-%%-GO:0006336-&&-DNA replication-independent nucleosome assembly-%%-GO:0006352-&&-DNA-templated transcription, initiation-%%-GO:0016233-&&-telomere capping-%…	["KEGG-&-1&-hsa05322-&&-Systemic lupus erythematosus-%%-hsa05034-&&-Alcoholism-%%-hsa05203-&&-Viral carcinogenesis"]	HIST1H4H	Homo sapiens (Human)-&&-9606	taxon:9606	["Gene Symbol-&-1&-HIST1H4H"]	[""]	FALSE	85	65.4613	85
HIST1H4C	HIST1H4C	G:9606:HIST1H4C	176635	1902	histone cluster 1 H4 family member c	gene	["biological_process-&-1&-GO:0000183-&&-chromatin silencing at rDNA-%%-GO:0006334-&&-nucleosome assembly-%%-GO:0006303-&&-double-strand break repair via nonhomologous end joining-%%-GO:0006335-&&-DNA replication-dependent nucleosome assembly-%%-GO:0006336-&&-DNA replication-independent nucleosome assembly-%%-GO:0006352-&&-DNA-templated transcription, initiation-%%-GO:0016233-&&-telomere capping-%…	["KEGG-&-1&-hsa05322-&&-Systemic lupus erythematosus-%%-hsa05034-&&-Alcoholism-%%-hsa05203-&&-Viral carcinogenesis"]	HIST1H4C	Homo sapiens (Human)-&&-9606	taxon:9606	["Gene Symbol-&-1&-HIST1H4C"]	[""]	FALSE	85	65.4613	85
HIST1H4E	HIST1H4E	G:9606:HIST1H4E	176632	1902	histone cluster 1 H4 family member e	gene	["biological_process-&-1&-GO:0000183-&&-chromatin silencing at rDNA-%%-GO:0006334-&&-nucleosome assembly-%%-GO:0006303-&&-double-strand break repair via nonhomologous end joining-%%-GO:0006335-&&-DNA replication-dependent nucleosome assembly-%%-GO:0006336-&&-DNA replication-independent nucleosome assembly-%%-GO:0006352-&&-DNA-templated transcription, initiation-%%-GO:0016233-&&-telomere capping-%…	["KEGG-&-1&-hsa05322-&&-Systemic lupus erythematosus-%%-hsa05203-&&-Viral carcinogenesis-%%-hsa05034-&&-Alcoholism"]	HIST1H4E	Homo sapiens (Human)-&&-9606	taxon:9606	["Gene Symbol-&-1&-HIST1H4E"]	[""]	FALSE	85	65.4613	85
BIRC3	BIRC3	G:9606:BIRC3	182776	1902	baculoviral IAP repeat containing 3	gene	["biological_process-&-1&-GO:0006915-&&-apoptotic process-%%-GO:0016567-&&-protein ubiquitination-%%-GO:0007166-&&-cell surface receptor signaling pathway-%%-GO:0007249-&&-I-kappaB kinase/NF-kappaB signaling-%%-GO:0007283-&&-spermatogenesis-%%-GO:0043066-&&-negative regulation of apoptotic process-%%-GO:0010803-&&-regulation of tumor necrosis factor-mediated signaling pathway-%%-GO:0042981-&&-reg…	["KEGG-&-1&-hsa04064-&&-NF-kappa B signaling pathway-%%-hsa04120-&&-Ubiquitin mediated proteolysis-%%-hsa04510-&&-Focal adhesion-%%-hsa04210-&&-Apoptosis-%%-hsa05145-&&-Toxoplasmosis-%%-hsa05200-&&-Pathways in cancer-%%-hsa04621-&&-NOD-like receptor signaling pathway-%%-hsa04668-&&-TNF signaling pathway-%%-hsa04215-&&-Apoptosis - multiple species-%%-hsa01524-&&-Platinum drug resistance-%%-hsa0421…	BIRC3	Homo sapiens (Human)-&&-9606	taxon:9606	["Gene Symbol-&-1&-BIRC3"]	[""]	FALSE	25	25
HIST1H4B	HIST1H4B	G:9606:HIST1H4B	176633	1902	histone cluster 1 H4 family member b	gene	["biological_process-&-1&-GO:0000183-&&-chromatin silencing at rDNA-%%-GO:0006334-&&-nucleosome assembly-%%-GO:0006303-&&-double-strand break repair via nonhomologous end joining-%%-GO:0006335-&&-DNA replication-dependent nucleosome assembly-%%-GO:0006336-&&-DNA replication-independent nucleosome assembly-%%-GO:0006352-&&-DNA-templated transcription, initiation-%%-GO:0016233-&&-telomere capping-%…	["KEGG-&-1&-hsa05322-&&-Systemic lupus erythematosus-%%-hsa05203-&&-Viral carcinogenesis-%%-hsa05034-&&-Alcoholism"]	HIST1H4B	Homo sapiens (Human)-&&-9606	taxon:9606	["Gene Symbol-&-1&-HIST1H4B"]	[""]	FALSE	85	65.4613	85
STK39	STK39	G:9606:STK39	172537	1902	serine/threonine kinase 39	gene	["biological_process-&-1&-GO:0001933-&&-negative regulation of protein phosphorylation-%%-GO:0035556-&&-intracellular signal transduction-%%-GO:0006468-&&-protein phosphorylation-%%-GO:0006950-&&-response to stress-%%-GO:0008217-&&-regulation of blood pressure-%%-GO:0018105-&&-peptidyl-serine phosphorylation-%%-GO:0018107-&&-peptidyl-threonine phosphorylation-%%-GO:0023014-&&-signal transduction …	[""]	STK39	Homo sapiens (Human)-&&-9606	taxon:9606	["Gene Symbol-&-1&-STK39"]	[""]	FALSE	6	6
BIRC2	BIRC2	G:9606:BIRC2	182777	1902	baculoviral IAP repeat containing 2	gene	["biological_process-&-1&-GO:0000209-&&-protein polyubiquitination-%%-GO:0001666-&&-response to hypoxia-%%-GO:0001890-&&-placenta development-%%-GO:0051726-&&-regulation of cell cycle-%%-GO:0006351-&&-transcription, DNA-templated-%%-GO:0006355-&&-regulation of transcription, DNA-templated-%%-GO:0007166-&&-cell surface receptor signaling pathway-%%-GO:0007249-&&-I-kappaB kinase/NF-kappaB signaling…	["KEGG-&-1&-hsa04120-&&-Ubiquitin mediated proteolysis-%%-hsa04064-&&-NF-kappa B signaling pathway-%%-hsa04510-&&-Focal adhesion-%%-hsa04210-&&-Apoptosis-%%-hsa05145-&&-Toxoplasmosis-%%-hsa04390-&&-Hippo signaling pathway-%%-hsa05200-&&-Pathways in cancer-%%-hsa04621-&&-NOD-like receptor signaling pathway-%%-hsa04668-&&-TNF signaling pathway-%%-hsa04215-&&-Apoptosis - multiple species-%%-hsa01524…	BIRC2	Homo sapiens (Human)-&&-9606	taxon:9606	["Gene Symbol-&-1&-BIRC2"]	[""]	FALSE	31	31
USP20	USP20	G:9606:USP20	174590	1902	ubiquitin specific peptidase 20	gene	["biological_process-&-1&-GO:0006511-&&-ubiquitin-dependent protein catabolic process-%%-GO:0006897-&&-endocytosis-%%-GO:0008277-&&-regulation of G-protein coupled receptor protein signaling pathway-%%-GO:0016579-&&-protein deubiquitination-%%-GO:0070536-&&-protein K63-linked deubiquitination-%%-GO:0071108-&&-protein K48-linked deubiquitination","cellular_component-&-1&-GO:0005829-&&-cytosol-%%-G…	[""]	USP20	Homo sapiens (Human)-&&-9606	taxon:9606	["Gene Symbol-&-1&-USP20"]	[""]	FALSE	10	10
HEATR1	HEATR1	G:9606:HEATR1	170495	1902	HEAT repeat containing 1	gene	["biological_process-&-1&-GO:0000462-&&-maturation of SSU-rRNA from tricistronic rRNA transcript (SSU-rRNA, 5.8S rRNA, LSU-rRNA)-%%-GO:0006364-&&-rRNA processing-%%-GO:0045943-&&-positive regulation of transcription from RNA polymerase I promoter","cellular_component-&-1&-GO:0001650-&&-fibrillar center-%%-GO:0016020-&&-membrane-%%-GO:0005739-&&-mitochondrion-%%-GO:0005654-&&-nucleoplasm-%%-GO:003…	["KEGG-&-1&-hsa03008-&&-Ribosome biogenesis in eukaryotes"]	HEATR1	Homo sapiens (Human)-&&-9606	taxon:9606	["Gene Symbol-&-1&-HEATR1"]	[""]	FALSE	11	11
PRTN3	PRTN3	G:9606:PRTN3	178687	1902	proteinase 3	gene	["biological_process-&-1&-GO:0019730-&&-antimicrobial humoral response-%%-GO:0007596-&&-blood coagulation-%%-GO:0006508-&&-proteolysis-%%-GO:0008284-&&-positive regulation of cell proliferation-%%-GO:0030574-&&-collagen catabolic process-%%-GO:0043312-&&-neutrophil degranulation-%%-GO:0050765-&&-negative regulation of phagocytosis-%%-GO:0097029-&&-mature conventional dendritic cell differentiatio…	[""]	PRTN3	Homo sapiens (Human)-&&-9606	taxon:9606	["Gene Symbol-&-1&-PRTN3"]	[""]	FALSE	8	8
APCS	APCS	G:9606:APCS	182781	1902	amyloid P component, serum	gene	["biological_process-&-1&-GO:0002674-&&-negative regulation of acute inflammatory response-%%-GO:0006457-&&-protein folding-%%-GO:0006953-&&-acute-phase response-%%-GO:0051131-&&-chaperone-mediated protein complex assembly-%%-GO:0044267-&&-cellular protein metabolic process-%%-GO:0044869-&&-negative regulation by host of viral exo-alpha-sialidase activity-%%-GO:0044871-&&-negative regulation by h…	[""]	APCS	Homo sapiens (Human)-&&-9606	taxon:9606	["Gene Symbol-&-1&-APCS"]	[""]	FALSE	9	9
GFM1	GFM1	G:9606:GFM1	166403	1902	G elongation factor mitochondrial 1	gene	["biological_process-&-1&-GO:0070125-&&-mitochondrial translational elongation","cellular_component-&-1&-GO:0005739-&&-mitochondrion-%%-GO:0005759-&&-mitochondrial matrix","molecular_function-&-1&-GO:0005515-&&-protein binding-%%-GO:0003924-&&-GTPase activity-%%-GO:0003723-&&-RNA binding-%%-GO:0003746-&&-translation elongation factor activity-%%-GO:0005525-&&-GTP binding"]	[""]	GFM1	Homo sapiens (Human)-&&-9606	taxon:9606	["Gene Symbol-&-1&-GFM1"]	[""]	FALSE	5	5
YWHAZ	YWHAZ	G:9606:YWHAZ	176646	1902	tyrosine 3-monooxygenase/tryptophan 5-monooxygenase activation protein zeta	gene	["biological_process-&-1&-GO:0007165-&&-signal transduction-%%-GO:0006605-&&-protein targeting-%%-GO:0043066-&&-negative regulation of apoptotic process-%%-GO:0030168-&&-platelet activation-%%-GO:0043488-&&-regulation of mRNA stability-%%-GO:0051683-&&-establishment of Golgi localization-%%-GO:0061024-&&-membrane organization-%%-GO:0090168-&&-Golgi reassembly-%%-GO:1900740-&&-positive regulation …	["KEGG-&-1&-hsa04110-&&-Cell cycle-%%-hsa05161-&&-Hepatitis B-%%-hsa04151-&&-PI3K-Akt signaling pathway-%%-hsa05130-&&-Pathogenic Escherichia coli infection-%%-hsa04390-&&-Hippo signaling pathway-%%-hsa04114-&&-Oocyte meiosis-%%-hsa05203-&&-Viral carcinogenesis-%%-hsa05160-&&-Hepatitis C"]	YWHAZ	Homo sapiens (Human)-&&-9606	taxon:9606	["Gene Symbol-&-1&-YWHAZ"]	[""]	FALSE	213	658.852	213
PGRMC1	PGRMC1	G:9606:PGRMC1	174599	1902	progesterone receptor membrane component 1	gene	["biological_process-&-1&-GO:0043312-&&-neutrophil degranulation","cellular_component-&-1&-GO:0005886-&&-plasma membrane-%%-GO:0016021-&&-integral component of membrane-%%-GO:0016020-&&-membrane-%%-GO:0005789-&&-endoplasmic reticulum membrane-%%-GO:0012505-&&-endomembrane system-%%-GO:0035579-&&-specific granule membrane-%%-GO:0070062-&&-extracellular exosome","molecular_function-&-1&-GO:0005515-…	[""]	PGRMC1	Homo sapiens (Human)-&&-9606	taxon:9606	["Gene Symbol-&-1&-PGRMC1"]	[""]	FALSE	21	21
EIF3CL	EIF3CL	G:9606:EIF3CL	154119	1902	eukaryotic translation initiation factor 3 subunit C-like	gene	["biological_process-&-1&-GO:0006413-&&-translational initiation","cellular_component-&-1&-GO:0005852-&&-eukaryotic translation initiation factor 3 complex","molecular_function-&-1&-GO:0003743-&&-translation initiation factor activity-%%-GO:0031369-&&-translation initiation factor binding"]	["KEGG-&-1&-hsa03013-&&-RNA transport"]	EIF3CL	Homo sapiens (Human)-&&-9606	taxon:9606	["Gene Symbol-&-1&-EIF3CL"]	[""]	FALSE	30	30
ZNF638	ZNF638	G:9606:ZNF638	172551	1902	zinc finger protein 638	gene	["biological_process-&-1&-GO:0006351-&&-transcription, DNA-templated-%%-GO:0006355-&&-regulation of transcription, DNA-templated-%%-GO:0008380-&&-RNA splicing","cellular_component-&-1&-GO:0005737-&&-cytoplasm-%%-GO:0005654-&&-nucleoplasm-%%-GO:0043231-&&-intracellular membrane-bounded organelle-%%-GO:0016607-&&-nuclear speck","molecular_function-&-1&-GO:0000166-&&-nucleotide binding-%%-GO:0003690…	[""]	ZNF638	Homo sapiens (Human)-&&-9606	taxon:9606	["Gene Symbol-&-1&-ZNF638"]	[""]	FALSE	10	10
EIF3K	EIF3K	G:9606:EIF3K	172548	1902	eukaryotic translation initiation factor 3 subunit K	gene	["biological_process-&-1&-GO:0006413-&&-translational initiation-%%-GO:0006446-&&-regulation of translational initiation","cellular_component-&-1&-GO:0016020-&&-membrane-%%-GO:0005829-&&-cytosol-%%-GO:0005634-&&-nucleus-%%-GO:0005852-&&-eukaryotic translation initiation factor 3 complex-%%-GO:0070062-&&-extracellular exosome","molecular_function-&-1&-GO:0005515-&&-protein binding-%%-GO:0003743-&&…	[""]	EIF3K	Homo sapiens (Human)-&&-9606	taxon:9606	["Gene Symbol-&-1&-EIF3K"]	[""]	FALSE	32	32
SF1	SF1	G:9606:SF1	176644	1902	splicing factor 1	gene	["biological_process-&-1&-GO:0000245-&&-spliceosomal complex assembly-%%-GO:0000389-&&-mRNA 3'-splice site recognition-%%-GO:0000398-&&-mRNA splicing, via spliceosome-%%-GO:0006351-&&-transcription, DNA-templated-%%-GO:0006355-&&-regulation of transcription, DNA-templated-%%-GO:0050810-&&-regulation of steroid biosynthetic process-%%-GO:0030238-&&-male sex determination-%%-GO:0030575-&&-nuclear b…	[""]	SF1	Homo sapiens (Human)-&&-9606	taxon:9606	["Gene Symbol-&-1&-SF1"]	[""]	FALSE	71	55.3433	71
YWHAB	YWHAB	G:9606:YWHAB	176650	1902	tyrosine 3-monooxygenase/tryptophan 5-monooxygenase activation protein beta	gene	["biological_process-&-1&-GO:0000165-&&-MAPK cascade-%%-GO:0006605-&&-protein targeting-%%-GO:0016032-&&-viral process-%%-GO:0045744-&&-negative regulation of G-protein coupled receptor protein signaling pathway-%%-GO:0045892-&&-negative regulation of transcription, DNA-templated-%%-GO:0035308-&&-negative regulation of protein dephosphorylation-%%-GO:0035329-&&-hippo signaling-%%-GO:0043085-&&-po…	["KEGG-&-1&-hsa04110-&&-Cell cycle-%%-hsa05161-&&-Hepatitis B-%%-hsa04151-&&-PI3K-Akt signaling pathway-%%-hsa04390-&&-Hippo signaling pathway-%%-hsa04114-&&-Oocyte meiosis-%%-hsa05203-&&-Viral carcinogenesis-%%-hsa05160-&&-Hepatitis C"]	YWHAB	Homo sapiens (Human)-&&-9606	taxon:9606	["Gene Symbol-&-1&-YWHAB"]	[""]	FALSE	90	69.8391	90
BCAS2	BCAS2	G:9606:BCAS2	174603	1902	BCAS2, pre-mRNA processing factor	gene	["biological_process-&-1&-GO:0000375-&&-RNA splicing, via transesterification reactions-%%-GO:0000398-&&-mRNA splicing, via spliceosome-%%-GO:0008380-&&-RNA splicing","cellular_component-&-1&-GO:0000974-&&-Prp19 complex-%%-GO:0005654-&&-nucleoplasm-%%-GO:0005662-&&-DNA replication factor A complex-%%-GO:0005681-&&-spliceosomal complex-%%-GO:0005730-&&-nucleolus-%%-GO:0005813-&&-centrosome-%%-GO:0…	["KEGG-&-1&-hsa03040-&&-Spliceosome"]	BCAS2	Homo sapiens (Human)-&&-9606	taxon:9606	["Gene Symbol-&-1&-BCAS2"]	[""]	FALSE	31	31
YWHAG	YWHAG	G:9606:YWHAG	176648	1902	tyrosine 3-monooxygenase/tryptophan 5-monooxygenase activation protein gamma	gene	["biological_process-&-1&-GO:0000086-&&-G2/M transition of mitotic cell cycle-%%-GO:0006469-&&-negative regulation of protein kinase activity-%%-GO:0006605-&&-protein targeting-%%-GO:0009966-&&-regulation of signal transduction-%%-GO:0032869-&&-cellular response to insulin stimulus-%%-GO:0045664-&&-regulation of neuron differentiation-%%-GO:0048167-&&-regulation of synaptic plasticity-%%-GO:00610…	["KEGG-&-1&-hsa04110-&&-Cell cycle-%%-hsa04151-&&-PI3K-Akt signaling pathway-%%-hsa04390-&&-Hippo signaling pathway-%%-hsa04114-&&-Oocyte meiosis-%%-hsa05203-&&-Viral carcinogenesis-%%-hsa05160-&&-Hepatitis C"]	YWHAG	Homo sapiens (Human)-&&-9606	taxon:9606	["Gene Symbol-&-1&-YWHAG"]	[""]	FALSE	108	207.515	108
YWHAE	YWHAE	G:9606:YWHAE	176649	1902	tyrosine 3-monooxygenase/tryptophan 5-monooxygenase activation protein epsilon	gene	["biological_process-&-1&-GO:0000086-&&-G2/M transition of mitotic cell cycle-%%-GO:0000165-&&-MAPK cascade-%%-GO:0001764-&&-neuron migration-%%-GO:0003064-&&-regulation of heart rate by hormone-%%-GO:0035556-&&-intracellular signal transduction-%%-GO:0006605-&&-protein targeting-%%-GO:0016032-&&-viral process-%%-GO:0021762-&&-substantia nigra development-%%-GO:0021766-&&-hippocampus development-…	["KEGG-&-1&-hsa04110-&&-Cell cycle-%%-hsa04151-&&-PI3K-Akt signaling pathway-%%-hsa04722-&&-Neurotrophin signaling pathway-%%-hsa04390-&&-Hippo signaling pathway-%%-hsa04114-&&-Oocyte meiosis-%%-hsa05203-&&-Viral carcinogenesis-%%-hsa05160-&&-Hepatitis C"]	YWHAE	Homo sapiens (Human)-&&-9606	taxon:9606	["Gene Symbol-&-1&-YWHAE"]	[""]	FALSE	124	254.783	124
PRSS2	PRSS2	G:9606:PRSS2	178697	1902	protease, serine 2	gene	["biological_process-&-1&-GO:0019730-&&-antimicrobial humoral response-%%-GO:0006508-&&-proteolysis-%%-GO:0007586-&&-digestion-%%-GO:0022617-&&-extracellular matrix disassembly-%%-GO:0030307-&&-positive regulation of cell growth-%%-GO:0030574-&&-collagen catabolic process-%%-GO:0043312-&&-neutrophil degranulation-%%-GO:0045785-&&-positive regulation of cell adhesion","cellular_component-&-1&-GO:0…	["KEGG-&-1&-hsa04080-&&-Neuroactive ligand-receptor interaction-%%-hsa04972-&&-Pancreatic secretion-%%-hsa05164-&&-Influenza A-%%-hsa04974-&&-Protein digestion and absorption"]	PRSS2	Homo sapiens (Human)-&&-9606	taxon:9606	["Gene Symbol-&-1&-PRSS2"]	[""]	FALSE	2	2
YES1	YES1	G:9606:YES1	176653	1902	YES proto-oncogene 1, Src family tyrosine kinase	gene	["biological_process-&-1&-GO:0007169-&&-transmembrane receptor protein tyrosine kinase signaling pathway-%%-GO:0006464-&&-cellular protein modification process-%%-GO:0015758-&&-glucose transport-%%-GO:0016477-&&-cell migration-%%-GO:0030154-&&-cell differentiation-%%-GO:0031295-&&-T cell costimulation-%%-GO:0036120-&&-cellular response to platelet-derived growth factor stimulus-%%-GO:0038083-&&-p…	["KEGG-&-1&-hsa04520-&&-Adherens junction"]	YES1	Homo sapiens (Human)-&&-9606	taxon:9606	["Gene Symbol-&-1&-YES1"]	[""]	FALSE	38	38
GAPDH	GAPDH	G:9606:GAPDH	180754	1902	glyceraldehyde-3-phosphate dehydrogenase	gene	["biological_process-&-1&-GO:0000226-&&-microtubule cytoskeleton organization-%%-GO:0006094-&&-gluconeogenesis-%%-GO:0016241-&&-regulation of macroautophagy-%%-GO:0050821-&&-protein stabilization-%%-GO:0017148-&&-negative regulation of translation-%%-GO:0035606-&&-peptidyl-cysteine S-trans-nitrosylation-%%-GO:0051402-&&-neuron apoptotic process-%%-GO:0061621-&&-canonical glycolysis-%%-GO:0071346-…	["KEGG-&-1&-hsa00010-&&-Glycolysis / Gluconeogenesis-%%-hsa01230-&&-Biosynthesis of amino acids-%%-hsa01200-&&-Carbon metabolism-%%-hsa01100-&&-Metabolic pathways-%%-hsa05010-&&-Alzheimer disease-%%-hsa04066-&&-HIF-1 signaling pathway"]	GAPDH	Homo sapiens (Human)-&&-9606	taxon:9606	["Gene Symbol-&-1&-GAPDH"]	[""]	FALSE	85	150.509	85
ANXA2	ANXA2	G:9606:ANXA2	182803	1902	annexin A2	gene	["biological_process-&-1&-GO:0001525-&&-angiogenesis-%%-GO:0001765-&&-membrane raft assembly-%%-GO:0001921-&&-positive regulation of receptor recycling-%%-GO:0001934-&&-positive regulation of protein phosphorylation-%%-GO:0006900-&&-membrane budding-%%-GO:0007589-&&-body fluid secretion-%%-GO:0030199-&&-collagen fibril organization-%%-GO:0031340-&&-positive regulation of vesicle fusion-%%-GO:0032…	[""]	ANXA2	Homo sapiens (Human)-&&-9606	taxon:9606	["Gene Symbol-&-1&-ANXA2"]	[""]	FALSE	64	99.4626	64
RBMX	RBMX	G:9606:RBMX	172560	1902	RNA binding motif protein, X-linked	gene	["biological_process-&-1&-GO:0000381-&&-regulation of alternative mRNA splicing, via spliceosome-%%-GO:0000398-&&-mRNA splicing, via spliceosome-%%-GO:0001649-&&-osteoblast differentiation-%%-GO:0006366-&&-transcription from RNA polymerase II promoter-%%-GO:0006376-&&-mRNA splice site selection-%%-GO:0006509-&&-membrane protein ectodomain proteolysis-%%-GO:0010467-&&-gene expression-%%-GO:0051260…	["KEGG-&-1&-hsa03040-&&-Spliceosome"]	RBMX	Homo sapiens (Human)-&&-9606	taxon:9606	["Gene Symbol-&-1&-RBMX"]	[""]	FALSE	39	39
XRCC5	XRCC5	G:9606:XRCC5	176657	1902	X-ray repair cross complementing 5	gene	["biological_process-&-1&-GO:0000723-&&-telomere maintenance-%%-GO:0006302-&&-double-strand break repair-%%-GO:0006303-&&-double-strand break repair via nonhomologous end joining-%%-GO:0006310-&&-DNA recombination-%%-GO:0006351-&&-transcription, DNA-templated-%%-GO:0007420-&&-brain development-%%-GO:0008283-&&-cell proliferation-%%-GO:0042493-&&-response to drug-%%-GO:0045892-&&-negative regulati…	["KEGG-&-1&-hsa03450-&&-Non-homologous end-joining"]	XRCC5	Homo sapiens (Human)-&&-9606	taxon:9606	["Gene Symbol-&-1&-XRCC5"]	[""]	FALSE	77	121.373	77
XPO1	XPO1	G:9606:XPO1	176662	1902	exportin 1	gene	["biological_process-&-1&-GO:0000054-&&-ribosomal subunit export from nucleus-%%-GO:0000055-&&-ribosomal large subunit export from nucleus-%%-GO:0000056-&&-ribosomal small subunit export from nucleus-%%-GO:0000122-&&-negative regulation of transcription from RNA polymerase II promoter-%%-GO:0006611-&&-protein export from nucleus-%%-GO:0007062-&&-sister chromatid cohesion-%%-GO:0042493-&&-response…	["KEGG-&-1&-hsa03008-&&-Ribosome biogenesis in eukaryotes-%%-hsa05166-&&-Human T-cell leukemia virus 1 infection-%%-hsa03013-&&-RNA transport-%%-hsa05164-&&-Influenza A"]	XPO1	Homo sapiens (Human)-&&-9606	taxon:9606	["Gene Symbol-&-1&-XPO1"]	[""]	FALSE	207	475.553	207
SLC25A5	SLC25A5	G:9606:SLC25A5	182806	1902	solute carrier family 25 member 5	gene	["biological_process-&-1&-GO:0007059-&&-chromosome segregation-%%-GO:0006810-&&-transport-%%-GO:0050796-&&-regulation of insulin secretion-%%-GO:0008284-&&-positive regulation of cell proliferation-%%-GO:0016032-&&-viral process-%%-GO:0015853-&&-adenine transport-%%-GO:0015866-&&-ADP transport-%%-GO:0015867-&&-ATP transport-%%-GO:0055085-&&-transmembrane transport-%%-GO:1901029-&&-negative regula…	["KEGG-&-1&-hsa05166-&&-Human T-cell leukemia virus 1 infection-%%-hsa04218-&&-Cellular senescence-%%-hsa04020-&&-Calcium signaling pathway-%%-hsa05016-&&-Huntington disease-%%-hsa04022-&&-cGMP-PKG signaling pathway-%%-hsa05012-&&-Parkinson disease-%%-hsa04217-&&-Necroptosis"]	SLC25A5	Homo sapiens (Human)-&&-9606	taxon:9606	["Gene Symbol-&-1&-SLC25A5"]	[""]	FALSE	71	118.85	71
ANXA1	ANXA1	G:9606:ANXA1	182804	1902	annexin A1	gene	["biological_process-&-1&-GO:0000733-&&-DNA strand renaturation-%%-GO:0036292-&&-DNA rewinding-%%-GO:0001780-&&-neutrophil homeostasis-%%-GO:0002250-&&-adaptive immune response-%%-GO:0002548-&&-monocyte chemotaxis-%%-GO:0002685-&&-regulation of leukocyte migration-%%-GO:0007165-&&-signal transduction-%%-GO:0006909-&&-phagocytosis-%%-GO:0006954-&&-inflammatory response-%%-GO:0007166-&&-cell surfac…	[""]	ANXA1	Homo sapiens (Human)-&&-9606	taxon:9606	["Gene Symbol-&-1&-ANXA1"]	[""]	FALSE	31	31
SLC25A6	SLC25A6	G:9606:SLC25A6	182805	1902	solute carrier family 25 member 6	gene	["biological_process-&-1&-GO:0006915-&&-apoptotic process-%%-GO:0006626-&&-protein targeting to mitochondrion-%%-GO:0050796-&&-regulation of insulin secretion-%%-GO:0015853-&&-adenine transport-%%-GO:0015866-&&-ADP transport-%%-GO:0015867-&&-ATP transport-%%-GO:0046732-&&-active induction of host immune response by virus-%%-GO:0046902-&&-regulation of mitochondrial membrane permeability-%%-GO:005…	["KEGG-&-1&-hsa05166-&&-Human T-cell leukemia virus 1 infection-%%-hsa04218-&&-Cellular senescence-%%-hsa04020-&&-Calcium signaling pathway-%%-hsa05016-&&-Huntington disease-%%-hsa05012-&&-Parkinson disease-%%-hsa04022-&&-cGMP-PKG signaling pathway-%%-hsa05164-&&-Influenza A-%%-hsa04217-&&-Necroptosis"]	SLC25A6	Homo sapiens (Human)-&&-9606	taxon:9606	["Gene Symbol-&-1&-SLC25A6"]	[""]	FALSE	29	29
ANK3	ANK3	G:9606:ANK3	182810	1902	ankyrin 3	gene	["biological_process-&-1&-GO:0000281-&&-mitotic cytokinesis-%%-GO:0007165-&&-signal transduction-%%-GO:0006888-&&-ER to Golgi vesicle-mediated transport-%%-GO:0007009-&&-plasma membrane organization-%%-GO:0007016-&&-cytoskeletal anchoring at plasma membrane-%%-GO:0007409-&&-axonogenesis-%%-GO:0007528-&&-neuromuscular junction development-%%-GO:0010628-&&-positive regulation of gene expression-%%-…	["KEGG-&-1&-hsa05205-&&-Proteoglycans in cancer"]	ANK3	Homo sapiens (Human)-&&-9606	taxon:9606	["Gene Symbol-&-1&-ANK3"]	[""]	FALSE	11	11
HELZ2	HELZ2	G:9606:HELZ2	166426	1902	helicase with zinc finger 2	gene	["biological_process-&-1&-GO:0006351-&&-transcription, DNA-templated-%%-GO:0044255-&&-cellular lipid metabolic process-%%-GO:0045944-&&-positive regulation of transcription from RNA polymerase II promoter","cellular_component-&-1&-GO:0016020-&&-membrane-%%-GO:0005654-&&-nucleoplasm","molecular_function-&-1&-GO:0005515-&&-protein binding-%%-GO:0003677-&&-DNA binding-%%-GO:0003723-&&-RNA binding-%%…	[""]	HELZ2	Homo sapiens (Human)-&&-9606	taxon:9606	["Gene Symbol-&-1&-HELZ2"]	[""]	FALSE	2	2
PROC	PROC	G:9606:PROC	178714	1902	protein C, inactivator of coagulation factors Va and VIIIa	gene	["biological_process-&-1&-GO:0001889-&&-liver development-%%-GO:0007596-&&-blood coagulation-%%-GO:0006465-&&-signal peptide processing-%%-GO:0006508-&&-proteolysis-%%-GO:0006888-&&-ER to Golgi vesicle-mediated transport-%%-GO:0043066-&&-negative regulation of apoptotic process-%%-GO:0050819-&&-negative regulation of coagulation-%%-GO:0017187-&&-peptidyl-glutamic acid carboxylation-%%-GO:0030195-…	["KEGG-&-1&-hsa04610-&&-Complement and coagulation cascades"]	PROC	Homo sapiens (Human)-&&-9606	taxon:9606	["Gene Symbol-&-1&-PROC"]	[""]	FALSE	8	8
PRNP	PRNP	G:9606:PRNP	178716	1902	prion protein	gene	["biological_process-&-1&-GO:0008152-&&-metabolic process-%%-GO:0001933-&&-negative regulation of protein phosphorylation-%%-GO:0007165-&&-signal transduction-%%-GO:0006878-&&-cellular copper ion homeostasis-%%-GO:0006979-&&-response to oxidative stress-%%-GO:0007050-&&-cell cycle arrest-%%-GO:0007616-&&-long-term memory-%%-GO:0043066-&&-negative regulation of apoptotic process-%%-GO:0046686-&&-r…	["KEGG-&-1&-hsa05020-&&-Prion diseases-%%-hsa04216-&&-Ferroptosis"]	PRNP	Homo sapiens (Human)-&&-9606	taxon:9606	["Gene Symbol-&-1&-PRNP"]	[""]	FALSE	12	12
STON2	STON2	G:9606:STON2	166428	1902	stonin 2	gene	["biological_process-&-1&-GO:0002244-&&-hematopoietic progenitor cell differentiation-%%-GO:0030100-&&-regulation of endocytosis-%%-GO:0048488-&&-synaptic vesicle endocytosis-%%-GO:0061024-&&-membrane organization","cellular_component-&-1&-GO:0016020-&&-membrane-%%-GO:0005829-&&-cytosol-%%-GO:0005730-&&-nucleolus-%%-GO:0008021-&&-synaptic vesicle-%%-GO:0043005-&&-neuron projection-%%-GO:0030054-&…	[""]	STON2	Homo sapiens (Human)-&&-9606	taxon:9606	["Gene Symbol-&-1&-STON2"]	[""]	FALSE	14	14
FTH1	FTH1	G:9606:FTH1	180771	1902	ferritin heavy chain 1	gene	["biological_process-&-1&-GO:0055114-&&-oxidation-reduction process-%%-GO:0006879-&&-cellular iron ion homeostasis-%%-GO:0006880-&&-intracellular sequestering of iron ion-%%-GO:0006955-&&-immune response-%%-GO:0008285-&&-negative regulation of cell proliferation-%%-GO:0043312-&&-neutrophil degranulation-%%-GO:0048147-&&-negative regulation of fibroblast proliferation-%%-GO:0097286-&&-iron ion imp…	["KEGG-&-1&-hsa04216-&&-Ferroptosis-%%-hsa04217-&&-Necroptosis-%%-hsa04978-&&-Mineral absorption"]	FTH1	Homo sapiens (Human)-&&-9606	taxon:9606	["Gene Symbol-&-1&-FTH1"]	[""]	FALSE	18	18
DIMT1	DIMT1	G:9606:DIMT1	172576	1902	DIM1 dimethyladenosine transferase 1 homolog	gene	["biological_process-&-1&-GO:0031167-&&-rRNA methylation","cellular_component-&-1&-GO:0005829-&&-cytosol-%%-GO:0005634-&&-nucleus-%%-GO:0005654-&&-nucleoplasm-%%-GO:0005730-&&-nucleolus-%%-GO:0005759-&&-mitochondrial matrix","molecular_function-&-1&-GO:0000179-&&-rRNA (adenine-N6,N6-)-dimethyltransferase activity-%%-GO:0003723-&&-RNA binding-%%-GO:0052909-&&-18S rRNA (adenine(1779)-N(6)/adenine(1…	[""]	DIMT1	Homo sapiens (Human)-&&-9606	taxon:9606	["Gene Symbol-&-1&-DIMT1"]	[""]	FALSE	20	20
SCUBE3	SCUBE3	G:9606:SCUBE3	162343	1902	signal peptide, CUB domain and EGF like domain containing 3	gene	["biological_process-&-1&-GO:0007165-&&-signal transduction-%%-GO:0030154-&&-cell differentiation-%%-GO:0051260-&&-protein homooligomerization-%%-GO:0045880-&&-positive regulation of smoothened signaling pathway-%%-GO:0051291-&&-protein heterooligomerization","cellular_component-&-1&-GO:0005615-&&-extracellular space-%%-GO:0009986-&&-cell surface","molecular_function-&-1&-GO:0005515-&&-protein bi…	[""]	SCUBE3	Homo sapiens (Human)-&&-9606	taxon:9606	["Gene Symbol-&-1&-SCUBE3"]	[""]	FALSE	2	2
NKD2	NKD2	G:9606:NKD2	166436	1902	naked cuticle homolog 2	gene	["biological_process-&-1&-GO:0016055-&&-Wnt signaling pathway-%%-GO:0006887-&&-exocytosis-%%-GO:0010954-&&-positive regulation of protein processing-%%-GO:0032436-&&-positive regulation of proteasomal ubiquitin-dependent protein catabolic process-%%-GO:0048210-&&-Golgi vesicle fusion to target membrane-%%-GO:0072661-&&-protein targeting to plasma membrane-%%-GO:0090004-&&-positive regulation of e…	["KEGG-&-1&-hsa04310-&&-Wnt signaling pathway"]	NKD2	Homo sapiens (Human)-&&-9606	taxon:9606	["Gene Symbol-&-1&-NKD2"]	[""]	FALSE	8	8
EDA2R	EDA2R	G:9606:EDA2R	168490	1902	ectodysplasin A2 receptor	gene	["biological_process-&-1&-GO:0007275-&&-multicellular organism development-%%-GO:0009888-&&-tissue development-%%-GO:0008544-&&-epidermis development-%%-GO:0010668-&&-ectodermal cell differentiation-%%-GO:0033209-&&-tumor necrosis factor-mediated signaling pathway-%%-GO:0043123-&&-positive regulation of I-kappaB kinase/NF-kappaB signaling-%%-GO:0046330-&&-positive regulation of JNK cascade-%%-GO:…	["KEGG-&-1&-hsa04060-&&-Cytokine-cytokine receptor interaction"]	EDA2R	Homo sapiens (Human)-&&-9606	taxon:9606	["Gene Symbol-&-1&-EDA2R"]	[""]	FALSE	6	6
LSM3	LSM3	G:9606:LSM3	172587	1902	LSM3 homolog, U6 small nuclear RNA and mRNA degradation associated	gene	["biological_process-&-1&-GO:0000398-&&-mRNA splicing, via spliceosome-%%-GO:0006397-&&-mRNA processing-%%-GO:0033962-&&-cytoplasmic mRNA processing body assembly-%%-GO:0043928-&&-exonucleolytic nuclear-transcribed mRNA catabolic process involved in deadenylation-dependent decay","cellular_component-&-1&-GO:0000932-&&-P-body-%%-GO:0005829-&&-cytosol-%%-GO:0005634-&&-nucleus-%%-GO:0005654-&&-nucle…	["KEGG-&-1&-hsa03018-&&-RNA degradation-%%-hsa03040-&&-Spliceosome"]	LSM3	Homo sapiens (Human)-&&-9606	taxon:9606	["Gene Symbol-&-1&-LSM3"]	[""]	FALSE	8	8
RGS8	RGS8	G:9606:RGS8	166440	1902	regulator of G-protein signaling 8	gene	["biological_process-&-1&-GO:0007213-&&-G-protein coupled acetylcholine receptor signaling pathway-%%-GO:0009968-&&-negative regulation of signal transduction-%%-GO:0043547-&&-positive regulation of GTPase activity-%%-GO:0060159-&&-regulation of dopamine receptor signaling pathway","cellular_component-&-1&-GO:0005886-&&-plasma membrane-%%-GO:0005634-&&-nucleus-%%-GO:0005737-&&-cytoplasm-%%-GO:003…	[""]	RGS8	Homo sapiens (Human)-&&-9606	taxon:9606	["Gene Symbol-&-1&-RGS8"]	[""]	FALSE	1	1
AMFR	AMFR	G:9606:AMFR	182831	1902	autocrine motility factor receptor	gene	["biological_process-&-1&-GO:0000209-&&-protein polyubiquitination-%%-GO:0042787-&&-protein ubiquitination involved in ubiquitin-dependent protein catabolic process-%%-GO:0006457-&&-protein folding-%%-GO:0007165-&&-signal transduction-%%-GO:0006511-&&-ubiquitin-dependent protein catabolic process-%%-GO:0006928-&&-movement of cell or subcellular component-%%-GO:0007568-&&-aging-%%-GO:0007611-&&-le…	["KEGG-&-1&-hsa04141-&&-Protein processing in endoplasmic reticulum"]	AMFR	Homo sapiens (Human)-&&-9606	taxon:9606	["Gene Symbol-&-1&-AMFR"]	[""]	FALSE	43	43
MAP2K1	MAP2K1	G:9606:MAP2K1	178732	1902	mitogen-activated protein kinase kinase 1	gene	["biological_process-&-1&-GO:0000165-&&-MAPK cascade-%%-GO:0000187-&&-activation of MAPK activity-%%-GO:0007165-&&-signal transduction-%%-GO:0006928-&&-movement of cell or subcellular component-%%-GO:0006935-&&-chemotaxis-%%-GO:0007050-&&-cell cycle arrest-%%-GO:0007507-&&-heart development-%%-GO:0008285-&&-negative regulation of cell proliferation-%%-GO:0010628-&&-positive regulation of gene exp…	["KEGG-&-1&-hsa04062-&&-Chemokine signaling pathway-%%-hsa04810-&&-Regulation of actin cytoskeleton-%%-hsa04072-&&-Phospholipase D signaling pathway-%%-hsa04916-&&-Melanogenesis-%%-hsa01522-&&-Endocrine resistance-%%-hsa04068-&&-FoxO signaling pathway-%%-hsa01521-&&-EGFR tyrosine kinase inhibitor resistance-%%-hsa05220-&&-Chronic myeloid leukemia-%%-hsa04720-&&-Long-term potentiation-%%-hsa04722-…	MAP2K1	Homo sapiens (Human)-&&-9606	taxon:9606	["Gene Symbol-&-1&-MAP2K1"]	[""]	FALSE	31	31
MAPK8	MAPK8	G:9606:MAPK8	178737	1902	mitogen-activated protein kinase 8	gene	["biological_process-&-1&-GO:0006468-&&-protein phosphorylation-%%-GO:0006950-&&-response to stress-%%-GO:0007254-&&-JNK cascade-%%-GO:0007258-&&-JUN phosphorylation-%%-GO:0043066-&&-negative regulation of apoptotic process-%%-GO:0009411-&&-response to UV-%%-GO:0010628-&&-positive regulation of gene expression-%%-GO:0016241-&&-regulation of macroautophagy-%%-GO:0018105-&&-peptidyl-serine phosphor…	["KEGG-&-1&-hsa04068-&&-FoxO signaling pathway-%%-hsa01522-&&-Endocrine resistance-%%-hsa04933-&&-AGE-RAGE signaling pathway in diabetic complications-%%-hsa04722-&&-Neurotrophin signaling pathway-%%-hsa04530-&&-Tight junction-%%-hsa04920-&&-Adipocytokine signaling pathway-%%-hsa04137-&&-Mitophagy - animal-%%-hsa04658-&&-Th1 and Th2 cell differentiation-%%-hsa05142-&&-Chagas disease (American try…	MAPK8	Homo sapiens (Human)-&&-9606	taxon:9606	["Gene Symbol-&-1&-MAPK8"]	[""]	FALSE	68	63.3352	68
MAPK1	MAPK1	G:9606:MAPK1	178742	1902	mitogen-activated protein kinase 1	gene	["biological_process-&-1&-GO:0000165-&&-MAPK cascade-%%-GO:0000187-&&-activation of MAPK activity-%%-GO:0000189-&&-MAPK import into nucleus-%%-GO:0006915-&&-apoptotic process-%%-GO:0007165-&&-signal transduction-%%-GO:0006351-&&-transcription, DNA-templated-%%-GO:0006468-&&-protein phosphorylation-%%-GO:0006935-&&-chemotaxis-%%-GO:0006950-&&-response to stress-%%-GO:0006974-&&-cellular response t…	["KEGG-&-1&-hsa04062-&&-Chemokine signaling pathway-%%-hsa04916-&&-Melanogenesis-%%-hsa01522-&&-Endocrine resistance-%%-hsa04713-&&-Circadian entrainment-%%-hsa05213-&&-Endometrial cancer-%%-hsa05230-&&-Central carbon metabolism in cancer-%%-hsa04540-&&-Gap junction-%%-hsa04914-&&-Progesterone-mediated oocyte maturation-%%-hsa04664-&&-Fc epsilon RI signaling pathway-%%-hsa04662-&&-B cell receptor…	MAPK1	Homo sapiens (Human)-&&-9606	taxon:9606	["Gene Symbol-&-1&-MAPK1"]	[""]	FALSE	106	194.502	106
MYLK2	MYLK2	G:9606:MYLK2	166455	1902	myosin light chain kinase 2	gene	["biological_process-&-1&-GO:0035556-&&-intracellular signal transduction-%%-GO:0006941-&&-striated muscle contraction-%%-GO:0007274-&&-neuromuscular synaptic transmission-%%-GO:0010628-&&-positive regulation of gene expression-%%-GO:0014816-&&-skeletal muscle satellite cell differentiation-%%-GO:0018105-&&-peptidyl-serine phosphorylation-%%-GO:0018107-&&-peptidyl-threonine phosphorylation-%%-GO:…	["KEGG-&-1&-hsa04810-&&-Regulation of actin cytoskeleton-%%-hsa04921-&&-Oxytocin signaling pathway-%%-hsa04611-&&-Platelet activation-%%-hsa04510-&&-Focal adhesion-%%-hsa04020-&&-Calcium signaling pathway-%%-hsa04022-&&-cGMP-PKG signaling pathway-%%-hsa04971-&&-Gastric acid secretion-%%-hsa04270-&&-Vascular smooth muscle contraction-%%-hsa04371-&&-Apelin signaling pathway"]	MYLK2	Homo sapiens (Human)-&&-9606	taxon:9606	["Gene Symbol-&-1&-MYLK2"]	[""]	FALSE	7	7
MAPK3	MAPK3	G:9606:MAPK3	178741	1902	mitogen-activated protein kinase 3	gene	["biological_process-&-1&-GO:0000165-&&-MAPK cascade-%%-GO:0000187-&&-activation of MAPK activity-%%-GO:0000189-&&-MAPK import into nucleus-%%-GO:0001934-&&-positive regulation of protein phosphorylation-%%-GO:0006915-&&-apoptotic process-%%-GO:0006361-&&-transcription initiation from RNA polymerase I promoter-%%-GO:0006461-&&-protein complex assembly-%%-GO:0006468-&&-protein phosphorylation-%%-G…	["KEGG-&-1&-hsa04062-&&-Chemokine signaling pathway-%%-hsa04916-&&-Melanogenesis-%%-hsa01522-&&-Endocrine resistance-%%-hsa04713-&&-Circadian entrainment-%%-hsa05213-&&-Endometrial cancer-%%-hsa05230-&&-Central carbon metabolism in cancer-%%-hsa04540-&&-Gap junction-%%-hsa04914-&&-Progesterone-mediated oocyte maturation-%%-hsa04664-&&-Fc epsilon RI signaling pathway-%%-hsa04662-&&-B cell receptor…	MAPK3	Homo sapiens (Human)-&&-9606	taxon:9606	["Gene Symbol-&-1&-MAPK3"]	[""]	FALSE	85	105.517	85
HNRNPR	HNRNPR	G:9606:HNRNPR	174648	1902	heterogeneous nuclear ribonucleoprotein R	gene	["biological_process-&-1&-GO:0000398-&&-mRNA splicing, via spliceosome-%%-GO:0006397-&&-mRNA processing-%%-GO:0007623-&&-circadian rhythm-%%-GO:0010467-&&-gene expression-%%-GO:0043086-&&-negative regulation of catalytic activity-%%-GO:0061014-&&-positive regulation of mRNA catabolic process-%%-GO:0061157-&&-mRNA destabilization","cellular_component-&-1&-GO:0030529-&&-intracellular ribonucleoprot…	[""]	HNRNPR	Homo sapiens (Human)-&&-9606	taxon:9606	["Gene Symbol-&-1&-HNRNPR"]	[""]	FALSE	87	106.379	87
PRKG1	PRKG1	G:9606:PRKG1	178744	1902	protein kinase, cGMP-dependent, type I	gene	["biological_process-&-1&-GO:0001764-&&-neuron migration-%%-GO:0030036-&&-actin cytoskeleton organization-%%-GO:0007165-&&-signal transduction-%%-GO:0006468-&&-protein phosphorylation-%%-GO:0016358-&&-dendrite development-%%-GO:0019934-&&-cGMP-mediated signaling-%%-GO:0030900-&&-forebrain development-%%-GO:0043087-&&-regulation of GTPase activity-%%-GO:0060087-&&-relaxation of vascular smooth mus…	["KEGG-&-1&-hsa04540-&&-Gap junction-%%-hsa04740-&&-Olfactory transduction-%%-hsa04611-&&-Platelet activation-%%-hsa04923-&&-Regulation of lipolysis in adipocytes-%%-hsa04713-&&-Circadian entrainment-%%-hsa04970-&&-Salivary secretion-%%-hsa04022-&&-cGMP-PKG signaling pathway-%%-hsa04714-&&-Thermogenesis-%%-hsa04270-&&-Vascular smooth muscle contraction-%%-hsa04730-&&-Long-term depression"]	PRKG1	Homo sapiens (Human)-&&-9606	taxon:9606	["Gene Symbol-&-1&-PRKG1"]	[""]	FALSE	10	10
PRKDC	PRKDC	G:9606:PRKDC	178745	1902	protein kinase, DNA-activated, catalytic polypeptide	gene	["biological_process-&-1&-GO:0001756-&&-somitogenesis-%%-GO:0001933-&&-negative regulation of protein phosphorylation-%%-GO:0002326-&&-B cell lineage commitment-%%-GO:0002328-&&-pro-B cell differentiation-%%-GO:0002360-&&-T cell lineage commitment-%%-GO:0002638-&&-negative regulation of immunoglobulin production-%%-GO:0002684-&&-positive regulation of immune system process-%%-GO:0016567-&&-protei…	["KEGG-&-1&-hsa04110-&&-Cell cycle-%%-hsa03450-&&-Non-homologous end-joining"]	PRKDC	Homo sapiens (Human)-&&-9606	taxon:9606	["Gene Symbol-&-1&-PRKDC"]	[""]	FALSE	96	264.558	96
ALOX15B	ALOX15B	G:9606:ALOX15B	182846	1902	arachidonate 15-lipoxygenase, type B	gene	["biological_process-&-1&-GO:0006915-&&-apoptotic process-%%-GO:0055114-&&-oxidation-reduction process-%%-GO:0006629-&&-lipid metabolic process-%%-GO:0008285-&&-negative regulation of cell proliferation-%%-GO:0010744-&&-positive regulation of macrophage derived foam cell differentiation-%%-GO:0019369-&&-arachidonic acid metabolic process-%%-GO:0019372-&&-lipoxygenase pathway-%%-GO:0030336-&&-nega…	["KEGG-&-1&-hsa01100-&&-Metabolic pathways-%%-hsa04726-&&-Serotonergic synapse-%%-hsa00590-&&-Arachidonic acid metabolism"]	ALOX15B	Homo sapiens (Human)-&&-9606	taxon:9606	["Gene Symbol-&-1&-ALOX15B"]	[""]	FALSE	2	2
DERL1	DERL1	G:9606:DERL1	168514	1902	derlin 1	gene	["biological_process-&-1&-GO:0006457-&&-protein folding-%%-GO:0006986-&&-response to unfolded protein-%%-GO:0019060-&&-intracellular transport of viral protein in host cell-%%-GO:0030433-&&-ER-associated ubiquitin-dependent protein catabolic process-%%-GO:0030968-&&-endoplasmic reticulum unfolded protein response-%%-GO:0030970-&&-retrograde protein transport, ER to cytosol-%%-GO:0031398-&&-positi…	["KEGG-&-1&-hsa04141-&&-Protein processing in endoplasmic reticulum-%%-hsa05014-&&-Amyotrophic lateral sclerosis (ALS)"]	DERL1	Homo sapiens (Human)-&&-9606	taxon:9606	["Gene Symbol-&-1&-DERL1"]	[""]	FALSE	24	24
ALOX5AP	ALOX5AP	G:9606:ALOX5AP	182851	1902	arachidonate 5-lipoxygenase activating protein	gene	["biological_process-&-1&-GO:0006691-&&-leukotriene metabolic process-%%-GO:0019370-&&-leukotriene biosynthetic process-%%-GO:0019372-&&-lipoxygenase pathway-%%-GO:0043085-&&-positive regulation of catalytic activity-%%-GO:0070207-&&-protein homotrimerization-%%-GO:0071277-&&-cellular response to calcium ion-%%-GO:2001300-&&-lipoxin metabolic process","cellular_component-&-1&-GO:0016021-&&-integr…	["KEGG-&-1&-hsa04664-&&-Fc epsilon RI signaling pathway"]	ALOX5AP	Homo sapiens (Human)-&&-9606	taxon:9606	["Gene Symbol-&-1&-ALOX5AP"]	[""]	FALSE	3	3
PRKCA	PRKCA	G:9606:PRKCA	178758	1902	protein kinase C alpha	gene	["biological_process-&-1&-GO:0001525-&&-angiogenesis-%%-GO:0001938-&&-positive regulation of endothelial cell proliferation-%%-GO:0002159-&&-desmosome assembly-%%-GO:0007155-&&-cell adhesion-%%-GO:0035556-&&-intracellular signal transduction-%%-GO:0006468-&&-protein phosphorylation-%%-GO:0007077-&&-mitotic nuclear envelope disassembly-%%-GO:0007190-&&-activation of adenylate cyclase activity-%%-G…	["KEGG-&-1&-hsa04072-&&-Phospholipase D signaling pathway-%%-hsa04916-&&-Melanogenesis-%%-hsa01521-&&-EGFR tyrosine kinase inhibitor resistance-%%-hsa05032-&&-Morphine addiction-%%-hsa04933-&&-AGE-RAGE signaling pathway in diabetic complications-%%-hsa04020-&&-Calcium signaling pathway-%%-hsa04720-&&-Long-term potentiation-%%-hsa04972-&&-Pancreatic secretion-%%-hsa04370-&&-VEGF signaling pathway-…	PRKCA	Homo sapiens (Human)-&&-9606	taxon:9606	["Gene Symbol-&-1&-PRKCA"]	[""]	FALSE	102	75.3558	102
ALOX5	ALOX5	G:9606:ALOX5	182852	1902	arachidonate 5-lipoxygenase	gene	["biological_process-&-1&-GO:0002540-&&-leukotriene production involved in inflammatory response-%%-GO:0055114-&&-oxidation-reduction process-%%-GO:0006691-&&-leukotriene metabolic process-%%-GO:0019370-&&-leukotriene biosynthetic process-%%-GO:0019372-&&-lipoxygenase pathway-%%-GO:0043312-&&-neutrophil degranulation-%%-GO:2001300-&&-lipoxin metabolic process","cellular_component-&-1&-GO:0005576-…	["KEGG-&-1&-hsa04664-&&-Fc epsilon RI signaling pathway-%%-hsa04913-&&-Ovarian steroidogenesis-%%-hsa05145-&&-Toxoplasmosis-%%-hsa01100-&&-Metabolic pathways-%%-hsa04726-&&-Serotonergic synapse-%%-hsa00590-&&-Arachidonic acid metabolism"]	ALOX5	Homo sapiens (Human)-&&-9606	taxon:9606	["Gene Symbol-&-1&-ALOX5"]	["ALOX5"]	TRUE	23	23
PRKCD	PRKCD	G:9606:PRKCD	178756	1902	protein kinase C delta	gene	["biological_process-&-1&-GO:0002223-&&-stimulatory C-type lectin receptor signaling pathway-%%-GO:0042742-&&-defense response to bacterium-%%-GO:0006915-&&-apoptotic process-%%-GO:0007165-&&-signal transduction-%%-GO:0006468-&&-protein phosphorylation-%%-GO:0007049-&&-cell cycle-%%-GO:0007202-&&-activation of phospholipase C activity-%%-GO:0008631-&&-intrinsic apoptotic signaling pathway in resp…	["KEGG-&-1&-hsa04062-&&-Chemokine signaling pathway-%%-hsa04933-&&-AGE-RAGE signaling pathway in diabetic complications-%%-hsa04722-&&-Neurotrophin signaling pathway-%%-hsa04750-&&-Inflammatory mediator regulation of TRP channels-%%-hsa04915-&&-Estrogen signaling pathway-%%-hsa04270-&&-Vascular smooth muscle contraction-%%-hsa04912-&&-GnRH signaling pathway-%%-hsa04931-&&-Insulin resistance-%%-hs…	PRKCD	Homo sapiens (Human)-&&-9606	taxon:9606	["Gene Symbol-&-1&-PRKCD"]	[""]	FALSE	65	66.5115	65
VTN	VTN	G:9606:VTN	176715	1902	vitronectin	gene	["biological_process-&-1&-GO:0007155-&&-cell adhesion-%%-GO:0006898-&&-receptor-mediated endocytosis-%%-GO:0006955-&&-immune response-%%-GO:0007160-&&-cell-matrix adhesion-%%-GO:0010811-&&-positive regulation of cell-substrate adhesion-%%-GO:0010951-&&-negative regulation of endopeptidase activity-%%-GO:0014911-&&-positive regulation of smooth muscle cell migration-%%-GO:0030195-&&-negative regul…	["KEGG-&-1&-hsa04510-&&-Focal adhesion-%%-hsa04512-&&-ECM-receptor interaction-%%-hsa04151-&&-PI3K-Akt signaling pathway-%%-hsa04610-&&-Complement and coagulation cascades-%%-hsa05165-&&-Human papillomavirus infection-%%-hsa05205-&&-Proteoglycans in cancer"]	VTN	Homo sapiens (Human)-&&-9606	taxon:9606	["Gene Symbol-&-1&-VTN"]	[""]	FALSE	28	28
PRKAR2A	PRKAR2A	G:9606:PRKAR2A	178760	1902	protein kinase cAMP-dependent type II regulatory subunit alpha	gene	["biological_process-&-1&-GO:0003091-&&-renal water homeostasis-%%-GO:0007596-&&-blood coagulation-%%-GO:0035556-&&-intracellular signal transduction-%%-GO:0034199-&&-activation of protein kinase A activity-%%-GO:0071377-&&-cellular response to glucagon stimulus-%%-GO:2000480-&&-negative regulation of cAMP-dependent protein kinase activity","cellular_component-&-1&-GO:0005886-&&-plasma membrane-%…	["KEGG-&-1&-hsa04910-&&-Insulin signaling pathway"]	PRKAR2A	Homo sapiens (Human)-&&-9606	taxon:9606	["Gene Symbol-&-1&-PRKAR2A"]	[""]	FALSE	14	14
ALDOA	ALDOA	G:9606:ALDOA	182860	1902	aldolase, fructose-bisphosphate A	gene	["biological_process-&-1&-GO:0002576-&&-platelet degranulation-%%-GO:0006000-&&-fructose metabolic process-%%-GO:0006094-&&-gluconeogenesis-%%-GO:0006096-&&-glycolytic process-%%-GO:0006754-&&-ATP biosynthetic process-%%-GO:0006941-&&-striated muscle contraction-%%-GO:0007015-&&-actin filament organization-%%-GO:0008360-&&-regulation of cell shape-%%-GO:0030388-&&-fructose 1,6-bisphosphate metabo…	["KEGG-&-1&-hsa00051-&&-Fructose and mannose metabolism-%%-hsa00030-&&-Pentose phosphate pathway-%%-hsa00010-&&-Glycolysis / Gluconeogenesis-%%-hsa01230-&&-Biosynthesis of amino acids-%%-hsa01200-&&-Carbon metabolism-%%-hsa01100-&&-Metabolic pathways-%%-hsa04066-&&-HIF-1 signaling pathway"]	ALDOA	Homo sapiens (Human)-&&-9606	taxon:9606	["Gene Symbol-&-1&-ALDOA"]	[""]	FALSE	35	35
GSTP1	GSTP1	G:9606:GSTP1	180819	1902	glutathione S-transferase pi 1	gene	["biological_process-&-1&-GO:0000302-&&-response to reactive oxygen species-%%-GO:0002674-&&-negative regulation of acute inflammatory response-%%-GO:0006749-&&-glutathione metabolic process-%%-GO:0006469-&&-negative regulation of protein kinase activity-%%-GO:0006805-&&-xenobiotic metabolic process-%%-GO:0007417-&&-central nervous system development-%%-GO:0043066-&&-negative regulation of apopto…	["KEGG-&-1&-hsa00982-&&-Drug metabolism - cytochrome P450-%%-hsa05225-&&-Hepatocellular carcinoma-%%-hsa01524-&&-Platinum drug resistance-%%-hsa00480-&&-Glutathione metabolism-%%-hsa05418-&&-Fluid shear stress and atherosclerosis-%%-hsa00980-&&-Metabolism of xenobiotics by cytochrome P450-%%-hsa05215-&&-Prostate cancer-%%-hsa05200-&&-Pathways in cancer-%%-hsa00983-&&-Drug metabolism - other enzym…	GSTP1	Homo sapiens (Human)-&&-9606	taxon:9606	["Gene Symbol-&-1&-GSTP1"]	[""]	FALSE	17	17
FLOT1	FLOT1	G:9606:FLOT1	174672	1902	flotillin 1	gene	["biological_process-&-1&-GO:0001765-&&-membrane raft assembly-%%-GO:0001819-&&-positive regulation of cytokine production-%%-GO:0001934-&&-positive regulation of protein phosphorylation-%%-GO:0002090-&&-regulation of receptor internalization-%%-GO:0007409-&&-axonogenesis-%%-GO:0022617-&&-extracellular matrix disassembly-%%-GO:0032092-&&-positive regulation of protein binding-%%-GO:0032226-&&-pos…	["KEGG-&-1&-hsa04910-&&-Insulin signaling pathway"]	FLOT1	Homo sapiens (Human)-&&-9606	taxon:9606	["Gene Symbol-&-1&-FLOT1"]	[""]	FALSE	50	50
PRKACB	PRKACB	G:9606:PRKACB	178768	1902	protein kinase cAMP-activated catalytic subunit beta	gene	["biological_process-&-1&-GO:0001843-&&-neural tube closure-%%-GO:0002223-&&-stimulatory C-type lectin receptor signaling pathway-%%-GO:0003091-&&-renal water homeostasis-%%-GO:0007596-&&-blood coagulation-%%-GO:0007165-&&-signal transduction-%%-GO:0006468-&&-protein phosphorylation-%%-GO:0007188-&&-adenylate cyclase-modulating G-protein coupled receptor signaling pathway-%%-GO:0034199-&&-activat…	["KEGG-&-1&-hsa04062-&&-Chemokine signaling pathway-%%-hsa04611-&&-Platelet activation-%%-hsa04916-&&-Melanogenesis-%%-hsa01522-&&-Endocrine resistance-%%-hsa05032-&&-Morphine addiction-%%-hsa04020-&&-Calcium signaling pathway-%%-hsa04720-&&-Long-term potentiation-%%-hsa04530-&&-Tight junction-%%-hsa04713-&&-Circadian entrainment-%%-hsa04962-&&-Vasopressin-regulated water reabsorption-%%-hsa05414…	PRKACB	Homo sapiens (Human)-&&-9606	taxon:9606	["Gene Symbol-&-1&-PRKACB"]	[""]	FALSE	21	21
JAZF1	JAZF1	G:9606:JAZF1	162385	1902	JAZF zinc finger 1	gene	["biological_process-&-1&-GO:0000122-&&-negative regulation of transcription from RNA polymerase II promoter-%%-GO:0006351-&&-transcription, DNA-templated-%%-GO:0006629-&&-lipid metabolic process","cellular_component-&-1&-GO:0001650-&&-fibrillar center-%%-GO:0005829-&&-cytosol-%%-GO:0005634-&&-nucleus-%%-GO:0017053-&&-transcriptional repressor complex","molecular_function-&-1&-GO:0000981-&&-RNA p…	[""]	JAZF1	Homo sapiens (Human)-&&-9606	taxon:9606	["Gene Symbol-&-1&-JAZF1"]	[""]	FALSE	2	2
PRKACA	PRKACA	G:9606:PRKACA	178769	1902	protein kinase cAMP-activated catalytic subunit alpha	gene	["biological_process-&-1&-GO:0000086-&&-G2/M transition of mitotic cell cycle-%%-GO:0001707-&&-mesoderm formation-%%-GO:0001843-&&-neural tube closure-%%-GO:0002027-&&-regulation of heart rate-%%-GO:0002223-&&-stimulatory C-type lectin receptor signaling pathway-%%-GO:0003091-&&-renal water homeostasis-%%-GO:0007596-&&-blood coagulation-%%-GO:0006397-&&-mRNA processing-%%-GO:0006468-&&-protein ph…	["KEGG-&-1&-hsa04062-&&-Chemokine signaling pathway-%%-hsa04611-&&-Platelet activation-%%-hsa04916-&&-Melanogenesis-%%-hsa01522-&&-Endocrine resistance-%%-hsa05032-&&-Morphine addiction-%%-hsa04020-&&-Calcium signaling pathway-%%-hsa04720-&&-Long-term potentiation-%%-hsa04530-&&-Tight junction-%%-hsa04713-&&-Circadian entrainment-%%-hsa04962-&&-Vasopressin-regulated water reabsorption-%%-hsa05414…	PRKACA	Homo sapiens (Human)-&&-9606	taxon:9606	["Gene Symbol-&-1&-PRKACA"]	[""]	FALSE	58	58
PATJ	PATJ	G:9606:PATJ	174676	1902	PATJ, crumbs cell polarity complex component	gene	["biological_process-&-1&-GO:0035556-&&-intracellular signal transduction-%%-GO:0070830-&&-bicellular tight junction assembly","cellular_component-&-1&-GO:0005886-&&-plasma membrane-%%-GO:0005829-&&-cytosol-%%-GO:0005813-&&-centrosome-%%-GO:0005815-&&-microtubule organizing center-%%-GO:0005923-&&-bicellular tight junction-%%-GO:0016324-&&-apical plasma membrane-%%-GO:0030054-&&-cell junction-%%-…	["KEGG-&-1&-hsa05165-&&-Human papillomavirus infection-%%-hsa04390-&&-Hippo signaling pathway-%%-hsa04530-&&-Tight junction"]	PATJ	Homo sapiens (Human)-&&-9606	taxon:9606	["Gene Symbol-&-1&-PATJ"]	[""]	FALSE	7	7
PRKAA2	PRKAA2	G:9606:PRKAA2	178772	1902	protein kinase AMP-activated catalytic subunit alpha 2	gene	["biological_process-&-1&-GO:0016055-&&-Wnt signaling pathway-%%-GO:0007165-&&-signal transduction-%%-GO:0035556-&&-intracellular signal transduction-%%-GO:0006351-&&-transcription, DNA-templated-%%-GO:0006355-&&-regulation of transcription, DNA-templated-%%-GO:0006468-&&-protein phosphorylation-%%-GO:0006633-&&-fatty acid biosynthetic process-%%-GO:0006695-&&-cholesterol biosynthetic process-%%-…	["KEGG-&-1&-hsa04922-&&-Glucagon signaling pathway-%%-hsa04068-&&-FoxO signaling pathway-%%-hsa04530-&&-Tight junction-%%-hsa04211-&&-Longevity regulating pathway-%%-hsa04152-&&-AMPK signaling pathway-%%-hsa04710-&&-Circadian rhythm-%%-hsa04920-&&-Adipocytokine signaling pathway-%%-hsa05418-&&-Fluid shear stress and atherosclerosis-%%-hsa05410-&&-Hypertrophic cardiomyopathy (HCM)-%%-hsa04213-&&-L…	PRKAA2	Homo sapiens (Human)-&&-9606	taxon:9606	["Gene Symbol-&-1&-PRKAA2"]	[""]	FALSE	16	16
PRKAA1	PRKAA1	G:9606:PRKAA1	178773	1902	protein kinase AMP-activated catalytic subunit alpha 1	gene	["biological_process-&-1&-GO:0000187-&&-activation of MAPK activity-%%-GO:0001666-&&-response to hypoxia-%%-GO:0016055-&&-Wnt signaling pathway-%%-GO:0007165-&&-signal transduction-%%-GO:0035556-&&-intracellular signal transduction-%%-GO:0006006-&&-glucose metabolic process-%%-GO:0006351-&&-transcription, DNA-templated-%%-GO:0006355-&&-regulation of transcription, DNA-templated-%%-GO:0006468-&&-p…	["KEGG-&-1&-hsa04922-&&-Glucagon signaling pathway-%%-hsa04068-&&-FoxO signaling pathway-%%-hsa04530-&&-Tight junction-%%-hsa04211-&&-Longevity regulating pathway-%%-hsa04710-&&-Circadian rhythm-%%-hsa04152-&&-AMPK signaling pathway-%%-hsa04920-&&-Adipocytokine signaling pathway-%%-hsa05418-&&-Fluid shear stress and atherosclerosis-%%-hsa05410-&&-Hypertrophic cardiomyopathy (HCM)-%%-hsa04213-&&-L…	PRKAA1	Homo sapiens (Human)-&&-9606	taxon:9606	["Gene Symbol-&-1&-PRKAA1"]	[""]	FALSE	26	26
EZR	EZR	G:9606:EZR	176730	1902	ezrin	gene	["biological_process-&-1&-GO:0000122-&&-negative regulation of transcription from RNA polymerase II promoter-%%-GO:0001951-&&-intestinal D-glucose absorption-%%-GO:0003376-&&-sphingosine-1-phosphate signaling pathway-%%-GO:0051017-&&-actin filament bundle assembly-%%-GO:0007016-&&-cytoskeletal anchoring at plasma membrane-%%-GO:0007159-&&-leukocyte cell-cell adhesion-%%-GO:0007411-&&-axon guidanc…	["KEGG-&-1&-hsa04810-&&-Regulation of actin cytoskeleton-%%-hsa05206-&&-MicroRNAs in cancer-%%-hsa04670-&&-Leukocyte transendothelial migration-%%-hsa05130-&&-Pathogenic Escherichia coli infection-%%-hsa04530-&&-Tight junction-%%-hsa04971-&&-Gastric acid secretion-%%-hsa05205-&&-Proteoglycans in cancer"]	EZR	Homo sapiens (Human)-&&-9606	taxon:9606	["Gene Symbol-&-1&-EZR"]	[""]	FALSE	49	49
HIST1H2BK	HIST1H2BK	G:9606:HIST1H2BK	166491	1902	histone cluster 1 H2B family member k	gene	["biological_process-&-1&-GO:0002227-&&-innate immune response in mucosa-%%-GO:0006334-&&-nucleosome assembly-%%-GO:0016567-&&-protein ubiquitination-%%-GO:0050830-&&-defense response to Gram-positive bacterium-%%-GO:0019731-&&-antibacterial humoral response","cellular_component-&-1&-GO:0000786-&&-nucleosome-%%-GO:0005829-&&-cytosol-%%-GO:0005615-&&-extracellular space-%%-GO:0005634-&&-nucleus-%%…	["KEGG-&-1&-hsa05322-&&-Systemic lupus erythematosus-%%-hsa05203-&&-Viral carcinogenesis-%%-hsa05034-&&-Alcoholism"]	HIST1H2BK	Homo sapiens (Human)-&&-9606	taxon:9606	["Gene Symbol-&-1&-HIST1H2BK"]	[""]	FALSE	20	20
SRGN	SRGN	G:9606:SRGN	178779	1902	serglycin	gene	["biological_process-&-1&-GO:0002576-&&-platelet degranulation-%%-GO:0016485-&&-protein processing-%%-GO:0008626-&&-granzyme-mediated apoptotic signaling pathway-%%-GO:0030502-&&-negative regulation of bone mineralization-%%-GO:0031214-&&-biomineral tissue development-%%-GO:0033364-&&-mast cell secretory granule organization-%%-GO:0033368-&&-protease localization to mast cell secretory granule-%%…	[""]	SRGN	Homo sapiens (Human)-&&-9606	taxon:9606	["Gene Symbol-&-1&-SRGN"]	[""]	FALSE	9	9
ALB	ALB	G:9606:ALB	182873	1902	albumin	gene	["biological_process-&-1&-GO:0001895-&&-retina homeostasis-%%-GO:0002576-&&-platelet degranulation-%%-GO:0006810-&&-transport-%%-GO:0006898-&&-receptor-mediated endocytosis-%%-GO:0043066-&&-negative regulation of apoptotic process-%%-GO:0009267-&&-cellular response to starvation-%%-GO:0019836-&&-hemolysis by symbiont of host erythrocytes-%%-GO:0015721-&&-bile acid and bile salt transport-%%-GO:00…	["KEGG-&-1&-hsa04918-&&-Thyroid hormone synthesis"]	ALB	Homo sapiens (Human)-&&-9606	taxon:9606	["Gene Symbol-&-1&-ALB"]	[""]	FALSE	44	44
VIM	VIM	G:9606:VIM	176729	1902	vimentin	gene	["biological_process-&-1&-GO:0006928-&&-movement of cell or subcellular component-%%-GO:0016032-&&-viral process-%%-GO:0010628-&&-positive regulation of gene expression-%%-GO:0010977-&&-negative regulation of neuron projection development-%%-GO:0014002-&&-astrocyte development-%%-GO:0030049-&&-muscle filament sliding-%%-GO:0045109-&&-intermediate filament organization-%%-GO:0060020-&&-Bergmann gl…	["KEGG-&-1&-hsa05206-&&-MicroRNAs in cancer-%%-hsa05169-&&-Epstein-Barr virus infection"]	VIM	Homo sapiens (Human)-&&-9606	taxon:9606	["Gene Symbol-&-1&-VIM"]	[""]	FALSE	64	57.3569	64
AKT1	AKT1	G:9606:AKT1	182878	1902	AKT serine/threonine kinase 1	gene	["biological_process-&-1&-GO:0000060-&&-protein import into nucleus, translocation-%%-GO:0000082-&&-G1/S transition of mitotic cell cycle-%%-GO:0001649-&&-osteoblast differentiation-%%-GO:0001893-&&-maternal placenta development-%%-GO:0001934-&&-positive regulation of protein phosphorylation-%%-GO:0001938-&&-positive regulation of endothelial cell proliferation-%%-GO:0007165-&&-signal transductio…	["KEGG-&-1&-hsa04062-&&-Chemokine signaling pathway-%%-hsa04072-&&-Phospholipase D signaling pathway-%%-hsa04611-&&-Platelet activation-%%-hsa01522-&&-Endocrine resistance-%%-hsa04068-&&-FoxO signaling pathway-%%-hsa01521-&&-EGFR tyrosine kinase inhibitor resistance-%%-hsa04933-&&-AGE-RAGE signaling pathway in diabetic complications-%%-hsa05220-&&-Chronic myeloid leukemia-%%-hsa04722-&&-Neurotrop…	AKT1	Homo sapiens (Human)-&&-9606	taxon:9606	["Gene Symbol-&-1&-AKT1"]	[""]	FALSE	108	154.538	108
PSME3	PSME3	G:9606:PSME3	174686	1902	proteasome activator subunit 3	gene	["biological_process-&-1&-GO:0000165-&&-MAPK cascade-%%-GO:0000209-&&-protein polyubiquitination-%%-GO:0002223-&&-stimulatory C-type lectin receptor signaling pathway-%%-GO:0002479-&&-antigen processing and presentation of exogenous peptide antigen via MHC class I, TAP-dependent-%%-GO:0006915-&&-apoptotic process-%%-GO:0006521-&&-regulation of cellular amino acid metabolic process-%%-GO:0061136-&…	["KEGG-&-1&-hsa04612-&&-Antigen processing and presentation-%%-hsa03050-&&-Proteasome-%%-hsa05160-&&-Hepatitis C"]	PSME3	Homo sapiens (Human)-&&-9606	taxon:9606	["Gene Symbol-&-1&-PSME3"]	[""]	FALSE	34	34
PRMT3	PRMT3	G:9606:PRMT3	174687	1902	protein arginine methyltransferase 3	gene	["biological_process-&-1&-GO:0006479-&&-protein methylation-%%-GO:0031397-&&-negative regulation of protein ubiquitination-%%-GO:0035246-&&-peptidyl-arginine N-methylation","cellular_component-&-1&-GO:0005829-&&-cytosol-%%-GO:0005840-&&-ribosome-%%-GO:0005737-&&-cytoplasm","molecular_function-&-1&-GO:0005515-&&-protein binding-%%-GO:0046872-&&-metal ion binding-%%-GO:0008168-&&-methyltransferase …	[""]	PRMT3	Homo sapiens (Human)-&&-9606	taxon:9606	["Gene Symbol-&-1&-PRMT3"]	[""]	FALSE	30	30
VEGFB	VEGFB	G:9606:VEGFB	176735	1902	vascular endothelial growth factor B	gene	["biological_process-&-1&-GO:0001525-&&-angiogenesis-%%-GO:0001666-&&-response to hypoxia-%%-GO:0001938-&&-positive regulation of endothelial cell proliferation-%%-GO:0002576-&&-platelet degranulation-%%-GO:0006493-&&-protein O-linked glycosylation-%%-GO:0042493-&&-response to drug-%%-GO:0045766-&&-positive regulation of angiogenesis-%%-GO:0048010-&&-vascular endothelial growth factor receptor si…	["KEGG-&-1&-hsa04015-&&-Rap1 signaling pathway-%%-hsa04510-&&-Focal adhesion-%%-hsa04151-&&-PI3K-Akt signaling pathway-%%-hsa04933-&&-AGE-RAGE signaling pathway in diabetic complications-%%-hsa04926-&&-Relaxin signaling pathway-%%-hsa04010-&&-MAPK signaling pathway-%%-hsa05200-&&-Pathways in cancer-%%-hsa04014-&&-Ras signaling pathway"]	VEGFB	Homo sapiens (Human)-&&-9606	taxon:9606	["Gene Symbol-&-1&-VEGFB"]	[""]	FALSE	5	5
VHL	VHL	G:9606:VHL	176732	1902	von Hippel-Lindau tumor suppressor	gene	["biological_process-&-1&-GO:0000122-&&-negative regulation of transcription from RNA polymerase II promoter-%%-GO:0000902-&&-cell morphogenesis-%%-GO:0016567-&&-protein ubiquitination-%%-GO:0006355-&&-regulation of transcription, DNA-templated-%%-GO:0006508-&&-proteolysis-%%-GO:0043066-&&-negative regulation of apoptotic process-%%-GO:0008285-&&-negative regulation of cell proliferation-%%-GO:00…	["KEGG-&-1&-hsa04120-&&-Ubiquitin mediated proteolysis-%%-hsa05211-&&-Renal cell carcinoma-%%-hsa04066-&&-HIF-1 signaling pathway-%%-hsa05200-&&-Pathways in cancer"]	VHL	Homo sapiens (Human)-&&-9606	taxon:9606	["Gene Symbol-&-1&-VHL"]	[""]	FALSE	191	468.777	191
RNF41	RNF41	G:9606:RNF41	174690	1902	ring finger protein 41	gene	["biological_process-&-1&-GO:0000209-&&-protein polyubiquitination-%%-GO:0006914-&&-autophagy-%%-GO:0008285-&&-negative regulation of cell proliferation-%%-GO:0010498-&&-proteasomal protein catabolic process-%%-GO:2000379-&&-positive regulation of reactive oxygen species metabolic process-%%-GO:0030336-&&-negative regulation of cell migration-%%-GO:0043408-&&-regulation of MAPK cascade-%%-GO:0045…	["KEGG-&-1&-hsa04144-&&-Endocytosis"]	RNF41	Homo sapiens (Human)-&&-9606	taxon:9606	["Gene Symbol-&-1&-RNF41"]	[""]	FALSE	13	13
VEGFA	VEGFA	G:9606:VEGFA	176736	1902	vascular endothelial growth factor A	gene	["biological_process-&-1&-GO:0000122-&&-negative regulation of transcription from RNA polymerase II promoter-%%-GO:0001525-&&-angiogenesis-%%-GO:0001541-&&-ovarian follicle development-%%-GO:0001569-&&-branching involved in blood vessel morphogenesis-%%-GO:0001570-&&-vasculogenesis-%%-GO:0001666-&&-response to hypoxia-%%-GO:0001701-&&-in utero embryonic development-%%-GO:0001822-&&-kidney develop…	["KEGG-&-1&-hsa04510-&&-Focal adhesion-%%-hsa01521-&&-EGFR tyrosine kinase inhibitor resistance-%%-hsa04933-&&-AGE-RAGE signaling pathway in diabetic complications-%%-hsa05212-&&-Pancreatic cancer-%%-hsa05165-&&-Human papillomavirus infection-%%-hsa04010-&&-MAPK signaling pathway-%%-hsa04926-&&-Relaxin signaling pathway-%%-hsa04066-&&-HIF-1 signaling pathway-%%-hsa04014-&&-Ras signaling pathway-%…	VEGFA	Homo sapiens (Human)-&&-9606	taxon:9606	["Gene Symbol-&-1&-VEGFA"]	["VEGFA"]	TRUE	29	29
VDR	VDR	G:9606:VDR	176737	1902	vitamin D (1,25- dihydroxyvitamin D3) receptor	gene	["biological_process-&-1&-GO:0000122-&&-negative regulation of transcription from RNA polymerase II promoter-%%-GO:0000902-&&-cell morphogenesis-%%-GO:0001501-&&-skeletal system development-%%-GO:0007165-&&-signal transduction-%%-GO:0006367-&&-transcription initiation from RNA polymerase II promoter-%%-GO:0006816-&&-calcium ion transport-%%-GO:0006874-&&-cellular calcium ion homeostasis-%%-GO:000…	["KEGG-&-1&-hsa04928-&&-Parathyroid hormone synthesis, secretion and action-%%-hsa04961-&&-Endocrine and other factor-regulated calcium reabsorption-%%-hsa05152-&&-Tuberculosis-%%-hsa04978-&&-Mineral absorption"]	VDR	Homo sapiens (Human)-&&-9606	taxon:9606	["Gene Symbol-&-1&-VDR"]	[""]	FALSE	41	41
VDAC1	VDAC1	G:9606:VDAC1	176742	1902	voltage dependent anion channel 1	gene	["biological_process-&-1&-GO:0001662-&&-behavioral fear response-%%-GO:0006915-&&-apoptotic process-%%-GO:0006820-&&-anion transport-%%-GO:0006851-&&-mitochondrial calcium ion transport-%%-GO:0007270-&&-neuron-neuron synaptic transmission-%%-GO:0007612-&&-learning-%%-GO:0016032-&&-viral process-%%-GO:2000378-&&-negative regulation of reactive oxygen species metabolic process-%%-GO:0016236-&&-macr…	["KEGG-&-1&-hsa04979-&&-Cholesterol metabolism-%%-hsa05166-&&-Human T-cell leukemia virus 1 infection-%%-hsa04621-&&-NOD-like receptor signaling pathway-%%-hsa04218-&&-Cellular senescence-%%-hsa04020-&&-Calcium signaling pathway-%%-hsa05016-&&-Huntington disease-%%-hsa05012-&&-Parkinson disease-%%-hsa04022-&&-cGMP-PKG signaling pathway-%%-hsa05164-&&-Influenza A-%%-hsa04217-&&-Necroptosis"]	VDAC1	Homo sapiens (Human)-&&-9606	taxon:9606	["Gene Symbol-&-1&-VDAC1"]	[""]	FALSE	54	54
VCP	VCP	G:9606:VCP	176743	1902	valosin containing protein	gene	["biological_process-&-1&-GO:0006457-&&-protein folding-%%-GO:0016567-&&-protein ubiquitination-%%-GO:0006281-&&-DNA repair-%%-GO:0006302-&&-double-strand break repair-%%-GO:0006479-&&-protein methylation-%%-GO:0006734-&&-NADH metabolic process-%%-GO:0006888-&&-ER to Golgi vesicle-mediated transport-%%-GO:0006914-&&-autophagy-%%-GO:0006919-&&-activation of cysteine-type endopeptidase activity inv…	["KEGG-&-1&-hsa04141-&&-Protein processing in endoplasmic reticulum-%%-hsa05134-&&-Legionellosis"]	VCP	Homo sapiens (Human)-&&-9606	taxon:9606	["Gene Symbol-&-1&-VCP"]	[""]	FALSE	180	406.316	180
ALYREF	ALYREF	G:9606:ALYREF	174692	1902	Aly/REF export factor	gene	["biological_process-&-1&-GO:0000018-&&-regulation of DNA recombination-%%-GO:0000398-&&-mRNA splicing, via spliceosome-%%-GO:0001649-&&-osteoblast differentiation-%%-GO:0006369-&&-termination of RNA polymerase II transcription-%%-GO:0006405-&&-RNA export from nucleus-%%-GO:0006406-&&-mRNA export from nucleus-%%-GO:0032786-&&-positive regulation of DNA-templated transcription, elongation-%%-GO:00…	["KEGG-&-1&-hsa03013-&&-RNA transport-%%-hsa03015-&&-mRNA surveillance pathway-%%-hsa03040-&&-Spliceosome-%%-hsa05168-&&-Herpes simplex infection"]	ALYREF	Homo sapiens (Human)-&&-9606	taxon:9606	["Gene Symbol-&-1&-ALYREF"]	[""]	FALSE	41	41
VDAC2	VDAC2	G:9606:VDAC2	176741	1902	voltage dependent anion channel 2	gene	["biological_process-&-1&-GO:0006820-&&-anion transport-%%-GO:0032272-&&-negative regulation of protein polymerization-%%-GO:0055085-&&-transmembrane transport-%%-GO:1903959-&&-regulation of anion transmembrane transport-%%-GO:2001243-&&-negative regulation of intrinsic apoptotic signaling pathway","cellular_component-&-1&-GO:0005739-&&-mitochondrion-%%-GO:0005634-&&-nucleus-%%-GO:0005741-&&-mito…	["KEGG-&-1&-hsa04979-&&-Cholesterol metabolism-%%-hsa05166-&&-Human T-cell leukemia virus 1 infection-%%-hsa04621-&&-NOD-like receptor signaling pathway-%%-hsa04216-&&-Ferroptosis-%%-hsa04218-&&-Cellular senescence-%%-hsa04020-&&-Calcium signaling pathway-%%-hsa05016-&&-Huntington disease-%%-hsa05012-&&-Parkinson disease-%%-hsa04022-&&-cGMP-PKG signaling pathway-%%-hsa04217-&&-Necroptosis"]	VDAC2	Homo sapiens (Human)-&&-9606	taxon:9606	["Gene Symbol-&-1&-VDAC2"]	[""]	FALSE	51	51
PLA2G2D	PLA2G2D	G:9606:PLA2G2D	172645	1902	phospholipase A2 group IID	gene	["biological_process-&-1&-GO:0002361-&&-CD4-positive, CD25-positive, alpha-beta regulatory T cell differentiation-%%-GO:0006644-&&-phospholipid metabolic process-%%-GO:0006654-&&-phosphatidic acid biosynthetic process-%%-GO:0006954-&&-inflammatory response-%%-GO:0016042-&&-lipid catabolic process-%%-GO:0036148-&&-phosphatidylglycerol acyl-chain remodeling-%%-GO:0036149-&&-phosphatidylinositol acy…	["KEGG-&-1&-hsa00565-&&-Ether lipid metabolism-%%-hsa00592-&&-alpha-Linolenic acid metabolism-%%-hsa00564-&&-Glycerophospholipid metabolism-%%-hsa04972-&&-Pancreatic secretion-%%-hsa01100-&&-Metabolic pathways-%%-hsa00591-&&-Linoleic acid metabolism-%%-hsa04014-&&-Ras signaling pathway-%%-hsa04975-&&-Fat digestion and absorption-%%-hsa04270-&&-Vascular smooth muscle contraction-%%-hsa00590-&&-Ara…	PLA2G2D	Homo sapiens (Human)-&&-9606	taxon:9606	["Gene Symbol-&-1&-PLA2G2D"]	[""]	FALSE	1	1
NR0B1	NR0B1	G:9606:NR0B1	182890	1902	nuclear receptor subfamily 0 group B member 1	gene	["biological_process-&-1&-GO:0000122-&&-negative regulation of transcription from RNA polymerase II promoter-%%-GO:0008104-&&-protein localization-%%-GO:0006367-&&-transcription initiation from RNA polymerase II promoter-%%-GO:0006694-&&-steroid biosynthetic process-%%-GO:0007283-&&-spermatogenesis-%%-GO:0008406-&&-gonad development-%%-GO:0008584-&&-male gonad development-%%-GO:0045892-&&-negativ…	["KEGG-&-1&-hsa04927-&&-Cortisol synthesis and secretion"]	NR0B1	Homo sapiens (Human)-&&-9606	taxon:9606	["Gene Symbol-&-1&-NR0B1"]	[""]	FALSE	5	5
ZBTB9	ZBTB9	G:9606:ZBTB9	162410	1902	zinc finger and BTB domain containing 9	gene	["biological_process-&-1&-GO:0006351-&&-transcription, DNA-templated-%%-GO:0006355-&&-regulation of transcription, DNA-templated","cellular_component-&-1&-GO:0005634-&&-nucleus","molecular_function-&-1&-GO:0005515-&&-protein binding-%%-GO:0003677-&&-DNA binding-%%-GO:0046872-&&-metal ion binding"]	[""]	ZBTB9	Homo sapiens (Human)-&&-9606	taxon:9606	["Gene Symbol-&-1&-ZBTB9"]	[""]	FALSE	8	8
VAV2	VAV2	G:9606:VAV2	176747	1902	vav guanine nucleotide exchange factor 2	gene	["biological_process-&-1&-GO:0001525-&&-angiogenesis-%%-GO:0007165-&&-signal transduction-%%-GO:0007264-&&-small GTPase mediated signal transduction-%%-GO:0008361-&&-regulation of cell size-%%-GO:0010468-&&-regulation of gene expression-%%-GO:0016477-&&-cell migration-%%-GO:0030032-&&-lamellipodium assembly-%%-GO:0030168-&&-platelet activation-%%-GO:0030193-&&-regulation of blood coagulation-%%-G…	["KEGG-&-1&-hsa04062-&&-Chemokine signaling pathway-%%-hsa04810-&&-Regulation of actin cytoskeleton-%%-hsa04015-&&-Rap1 signaling pathway-%%-hsa04510-&&-Focal adhesion-%%-hsa04664-&&-Fc epsilon RI signaling pathway-%%-hsa04024-&&-cAMP signaling pathway-%%-hsa04666-&&-Fc gamma R-mediated phagocytosis-%%-hsa04670-&&-Leukocyte transendothelial migration-%%-hsa04662-&&-B cell receptor signaling pathw…	VAV2	Homo sapiens (Human)-&&-9606	taxon:9606	["Gene Symbol-&-1&-VAV2"]	[""]	FALSE	22	22
VCL	VCL	G:9606:VCL	176744	1902	vinculin	gene	["biological_process-&-1&-GO:0002009-&&-morphogenesis of an epithelium-%%-GO:0002576-&&-platelet degranulation-%%-GO:0006936-&&-muscle contraction-%%-GO:0007155-&&-cell adhesion-%%-GO:0006928-&&-movement of cell or subcellular component-%%-GO:0007160-&&-cell-matrix adhesion-%%-GO:0030032-&&-lamellipodium assembly-%%-GO:0030336-&&-negative regulation of cell migration-%%-GO:0034333-&&-adherens jun…	["KEGG-&-1&-hsa04520-&&-Adherens junction-%%-hsa04810-&&-Regulation of actin cytoskeleton-%%-hsa05131-&&-Shigellosis-%%-hsa04510-&&-Focal adhesion-%%-hsa05146-&&-Amoebiasis-%%-hsa05100-&&-Bacterial invasion of epithelial cells-%%-hsa04670-&&-Leukocyte transendothelial migration"]	VCL	Homo sapiens (Human)-&&-9606	taxon:9606	["Gene Symbol-&-1&-VCL"]	[""]	FALSE	75	46.7318	75
PDIA3	PDIA3	G:9606:PDIA3	180840	1902	protein disulfide isomerase family A member 3	gene	["biological_process-&-1&-GO:0002474-&&-antigen processing and presentation of peptide antigen via MHC class I-%%-GO:0002479-&&-antigen processing and presentation of exogenous peptide antigen via MHC class I, TAP-dependent-%%-GO:0006457-&&-protein folding-%%-GO:0006606-&&-protein import into nucleus-%%-GO:0007165-&&-signal transduction-%%-GO:0055114-&&-oxidation-reduction process-%%-GO:0045454-&…	["KEGG-&-1&-hsa05163-&&-Human cytomegalovirus infection-%%-hsa04612-&&-Antigen processing and presentation-%%-hsa04141-&&-Protein processing in endoplasmic reticulum-%%-hsa05169-&&-Epstein-Barr virus infection-%%-hsa05170-&&-Human immunodeficiency virus 1 infection"]	PDIA3	Homo sapiens (Human)-&&-9606	taxon:9606	["Gene Symbol-&-1&-PDIA3"]	[""]	FALSE	47	47
VCAM1	VCAM1	G:9606:VCAM1	176745	1902	vascular cell adhesion molecule 1	gene	["biological_process-&-1&-GO:0007157-&&-heterophilic cell-cell adhesion via plasma membrane cell adhesion molecules-%%-GO:0001666-&&-response to hypoxia-%%-GO:0002526-&&-acute inflammatory response-%%-GO:0002544-&&-chronic inflammatory response-%%-GO:0007155-&&-cell adhesion-%%-GO:0055114-&&-oxidation-reduction process-%%-GO:0007159-&&-leukocyte cell-cell adhesion-%%-GO:0007160-&&-cell-matrix adh…	["KEGG-&-1&-hsa05144-&&-Malaria-%%-hsa04064-&&-NF-kappa B signaling pathway-%%-hsa05143-&&-African trypanosomiasis-%%-hsa04668-&&-TNF signaling pathway-%%-hsa04933-&&-AGE-RAGE signaling pathway in diabetic complications-%%-hsa04670-&&-Leukocyte transendothelial migration-%%-hsa04514-&&-Cell adhesion molecules (CAMs)-%%-hsa05418-&&-Fluid shear stress and atherosclerosis"]	VCAM1	Homo sapiens (Human)-&&-9606	taxon:9606	["Gene Symbol-&-1&-VCAM1"]	["VCAM1"]	TRUE	451	1233.14	451
VARS	VARS	G:9606:VARS	176750	1902	valyl-tRNA synthetase	gene	["biological_process-&-1&-GO:0006418-&&-tRNA aminoacylation for protein translation-%%-GO:0006438-&&-valyl-tRNA aminoacylation-%%-GO:0006450-&&-regulation of translational fidelity","cellular_component-&-1&-GO:0005739-&&-mitochondrion-%%-GO:0005829-&&-cytosol","molecular_function-&-1&-GO:0005515-&&-protein binding-%%-GO:0002161-&&-aminoacyl-tRNA editing activity-%%-GO:0004832-&&-valine-tRNA ligas…	["KEGG-&-1&-hsa00970-&&-Aminoacyl-tRNA biosynthesis"]	VARS	Homo sapiens (Human)-&&-9606	taxon:9606	["Gene Symbol-&-1&-VARS"]	[""]	FALSE	29	29
AGTR1	AGTR1	G:9606:AGTR1	182894	1902	angiotensin II receptor type 1	gene	["biological_process-&-1&-GO:0001558-&&-regulation of cell growth-%%-GO:0001822-&&-kidney development-%%-GO:0002018-&&-renin-angiotensin regulation of aldosterone production-%%-GO:0002034-&&-regulation of blood vessel diameter by renin-angiotensin-%%-GO:0035813-&&-regulation of renal sodium excretion-%%-GO:0003081-&&-regulation of systemic arterial blood pressure by renin-angiotensin-%%-GO:000718…	["KEGG-&-1&-hsa04072-&&-Phospholipase D signaling pathway-%%-hsa04925-&&-Aldosterone synthesis and secretion-%%-hsa04933-&&-AGE-RAGE signaling pathway in diabetic complications-%%-hsa04020-&&-Calcium signaling pathway-%%-hsa04614-&&-Renin-angiotensin system-%%-hsa05200-&&-Pathways in cancer-%%-hsa04270-&&-Vascular smooth muscle contraction-%%-hsa04934-&&-Cushing syndrome-%%-hsa04022-&&-cGMP-PKG s…	AGTR1	Homo sapiens (Human)-&&-9606	taxon:9606	["Gene Symbol-&-1&-AGTR1"]	[""]	FALSE	12	12
CXCL1	CXCL1	G:9606:CXCL1	180844	1902	C-X-C motif chemokine ligand 1	gene	["biological_process-&-1&-GO:0030036-&&-actin cytoskeleton organization-%%-GO:0007165-&&-signal transduction-%%-GO:0035556-&&-intracellular signal transduction-%%-GO:0006935-&&-chemotaxis-%%-GO:0006954-&&-inflammatory response-%%-GO:0006955-&&-immune response-%%-GO:0007186-&&-G-protein coupled receptor signaling pathway-%%-GO:0007399-&&-nervous system development-%%-GO:0008283-&&-cell proliferati…	["KEGG-&-1&-hsa05132-&&-Salmonella infection-%%-hsa04062-&&-Chemokine signaling pathway-%%-hsa05323-&&-Rheumatoid arthritis-%%-hsa04668-&&-TNF signaling pathway-%%-hsa04621-&&-NOD-like receptor signaling pathway-%%-hsa05146-&&-Amoebiasis-%%-hsa04060-&&-Cytokine-cytokine receptor interaction-%%-hsa05134-&&-Legionellosis-%%-hsa05120-&&-Epithelial cell signaling in Helicobacter pylori infection-%%-h…	CXCL1	Homo sapiens (Human)-&&-9606	taxon:9606	["Gene Symbol-&-1&-CXCL1"]	[""]	FALSE	5	5
VASP	VASP	G:9606:VASP	176749	1902	vasodilator-stimulated phosphoprotein	gene	["biological_process-&-1&-GO:0001843-&&-neural tube closure-%%-GO:0007411-&&-axon guidance-%%-GO:0008154-&&-actin polymerization or depolymerization-%%-GO:0030838-&&-positive regulation of actin filament polymerization-%%-GO:0034329-&&-cell junction assembly-%%-GO:0051289-&&-protein homotetramerization","cellular_component-&-1&-GO:0005886-&&-plasma membrane-%%-GO:0005829-&&-cytosol-%%-GO:0005923-…	["KEGG-&-1&-hsa04015-&&-Rap1 signaling pathway-%%-hsa04611-&&-Platelet activation-%%-hsa04510-&&-Focal adhesion-%%-hsa04670-&&-Leukocyte transendothelial migration-%%-hsa04666-&&-Fc gamma R-mediated phagocytosis-%%-hsa04022-&&-cGMP-PKG signaling pathway-%%-hsa04530-&&-Tight junction"]	VASP	Homo sapiens (Human)-&&-9606	taxon:9606	["Gene Symbol-&-1&-VASP"]	[""]	FALSE	25	25
PRRG4	PRRG4	G:9606:PRRG4	168557	1902	proline rich and Gla domain 4	gene	["biological_process-&-1&-GO:0008150-&&-biological_process","cellular_component-&-1&-GO:0016021-&&-integral component of membrane-%%-GO:0005576-&&-extracellular region","molecular_function-&-1&-GO:0005509-&&-calcium ion binding-%%-GO:0003674-&&-molecular_function"]	[""]	PRRG4	Homo sapiens (Human)-&&-9606	taxon:9606	["Gene Symbol-&-1&-PRRG4"]	[""]	FALSE	3	3
PPP3CA	PPP3CA	G:9606:PPP3CA	178800	1902	protein phosphatase 3 catalytic subunit alpha	gene	["biological_process-&-1&-GO:0000082-&&-G1/S transition of mitotic cell cycle-%%-GO:0001975-&&-response to amphetamine-%%-GO:0006606-&&-protein import into nucleus-%%-GO:0007223-&&-Wnt signaling pathway, calcium modulating pathway-%%-GO:0006470-&&-protein dephosphorylation-%%-GO:0006816-&&-calcium ion transport-%%-GO:0014883-&&-transition between fast and slow fiber-%%-GO:0014898-&&-cardiac muscl…	["KEGG-&-1&-hsa04922-&&-Glucagon signaling pathway-%%-hsa04310-&&-Wnt signaling pathway-%%-hsa04218-&&-Cellular senescence-%%-hsa04020-&&-Calcium signaling pathway-%%-hsa04720-&&-Long-term potentiation-%%-hsa04370-&&-VEGF signaling pathway-%%-hsa05152-&&-Tuberculosis-%%-hsa05163-&&-Human cytomegalovirus infection-%%-hsa05166-&&-Human T-cell leukemia virus 1 infection-%%-hsa04921-&&-Oxytocin signa…	PPP3CA	Homo sapiens (Human)-&&-9606	taxon:9606	["Gene Symbol-&-1&-PPP3CA"]	[""]	FALSE	22	22
SLC25A13	SLC25A13	G:9606:SLC25A13	174710	1902	solute carrier family 25 member 13	gene	["biological_process-&-1&-GO:0006094-&&-gluconeogenesis-%%-GO:0006754-&&-ATP biosynthetic process-%%-GO:0006810-&&-transport-%%-GO:0015810-&&-aspartate transport-%%-GO:0015813-&&-L-glutamate transport-%%-GO:0043490-&&-malate-aspartate shuttle-%%-GO:0045333-&&-cellular respiration-%%-GO:0051592-&&-response to calcium ion-%%-GO:0089711-&&-L-glutamate transmembrane transport-%%-GO:0089712-&&-L-aspar…	[""]	SLC25A13	Homo sapiens (Human)-&&-9606	taxon:9606	["Gene Symbol-&-1&-SLC25A13"]	[""]	FALSE	13	13
PPM1B	PPM1B	G:9606:PPM1B	178807	1902	protein phosphatase, Mg2+/Mn2+ dependent 1B	gene	["biological_process-&-1&-GO:0006470-&&-protein dephosphorylation-%%-GO:0006499-&&-N-terminal protein myristoylation-%%-GO:0032688-&&-negative regulation of interferon-beta production-%%-GO:0035970-&&-peptidyl-threonine dephosphorylation-%%-GO:0042347-&&-negative regulation of NF-kappaB import into nucleus-%%-GO:0043124-&&-negative regulation of I-kappaB kinase/NF-kappaB signaling-%%-GO:0050687-&…	["KEGG-&-1&-hsa04010-&&-MAPK signaling pathway"]	PPM1B	Homo sapiens (Human)-&&-9606	taxon:9606	["Gene Symbol-&-1&-PPM1B"]	[""]	FALSE	31	31
NR3C1	NR3C1	G:9606:NR3C1	180855	1902	nuclear receptor subfamily 3 group C member 1	gene	["biological_process-&-1&-GO:0007059-&&-chromosome segregation-%%-GO:0006366-&&-transcription from RNA polymerase II promoter-%%-GO:0006915-&&-apoptotic process-%%-GO:0007165-&&-signal transduction-%%-GO:0006351-&&-transcription, DNA-templated-%%-GO:0006355-&&-regulation of transcription, DNA-templated-%%-GO:0006367-&&-transcription initiation from RNA polymerase II promoter-%%-GO:0007067-&&-mito…	["KEGG-&-1&-hsa04080-&&-Neuroactive ligand-receptor interaction"]	NR3C1	Homo sapiens (Human)-&&-9606	taxon:9606	["Gene Symbol-&-1&-NR3C1"]	[""]	FALSE	96	96.9676	96
ACAN	ACAN	G:9606:ACAN	182901	1902	aggrecan	gene	["biological_process-&-1&-GO:0001501-&&-skeletal system development-%%-GO:0007155-&&-cell adhesion-%%-GO:0006508-&&-proteolysis-%%-GO:0007417-&&-central nervous system development-%%-GO:0018146-&&-keratan sulfate biosynthetic process-%%-GO:0022617-&&-extracellular matrix disassembly-%%-GO:0030198-&&-extracellular matrix organization-%%-GO:0042340-&&-keratan sulfate catabolic process","cellular_co…	[""]	ACAN	Homo sapiens (Human)-&&-9606	taxon:9606	["Gene Symbol-&-1&-ACAN"]	[""]	FALSE	7	7
LPAR6	LPAR6	G:9606:LPAR6	174714	1902	lysophosphatidic acid receptor 6	gene	["biological_process-&-1&-GO:0035025-&&-positive regulation of Rho protein signal transduction-%%-GO:0051482-&&-positive regulation of cytosolic calcium ion concentration involved in phospholipase C-activating G-protein coupled signaling pathway","cellular_component-&-1&-GO:0005886-&&-plasma membrane-%%-GO:0005887-&&-integral component of plasma membrane-%%-GO:0043231-&&-intracellular membrane-bo…	["KEGG-&-1&-hsa04072-&&-Phospholipase D signaling pathway-%%-hsa04151-&&-PI3K-Akt signaling pathway-%%-hsa04080-&&-Neuroactive ligand-receptor interaction-%%-hsa05200-&&-Pathways in cancer"]	LPAR6	Homo sapiens (Human)-&&-9606	taxon:9606	["Gene Symbol-&-1&-LPAR6"]	[""]	FALSE	2	2
UQCRC2	UQCRC2	G:9606:UQCRC2	176765	1902	ubiquinol-cytochrome c reductase core protein II	gene	["biological_process-&-1&-GO:0006119-&&-oxidative phosphorylation-%%-GO:0006122-&&-mitochondrial electron transport, ubiquinol to cytochrome c-%%-GO:0006627-&&-protein processing involved in protein targeting to mitochondrion-%%-GO:0009060-&&-aerobic respiration","cellular_component-&-1&-GO:0005739-&&-mitochondrion-%%-GO:0005654-&&-nucleoplasm-%%-GO:0005743-&&-mitochondrial inner membrane-%%-GO:0…	["KEGG-&-1&-hsa00190-&&-Oxidative phosphorylation-%%-hsa04260-&&-Cardiac muscle contraction-%%-hsa05016-&&-Huntington disease-%%-hsa05012-&&-Parkinson disease-%%-hsa01100-&&-Metabolic pathways-%%-hsa05010-&&-Alzheimer disease-%%-hsa04714-&&-Thermogenesis-%%-hsa04932-&&-Non-alcoholic fatty liver disease (NAFLD)"]	UQCRC2	Homo sapiens (Human)-&&-9606	taxon:9606	["Gene Symbol-&-1&-UQCRC2"]	[""]	FALSE	55	55
GRIN1	GRIN1	G:9606:GRIN1	180861	1902	glutamate ionotropic receptor NMDA type subunit 1	gene	["biological_process-&-1&-GO:0000165-&&-MAPK cascade-%%-GO:0001661-&&-conditioned taste aversion-%%-GO:0001967-&&-suckling behavior-%%-GO:0001975-&&-response to amphetamine-%%-GO:0006812-&&-cation transport-%%-GO:0006874-&&-cellular calcium ion homeostasis-%%-GO:0007585-&&-respiratory gaseous exchange-%%-GO:0007616-&&-long-term memory-%%-GO:0008344-&&-adult locomotory behavior-%%-GO:0008355-&&-ol…	["KEGG-&-1&-hsa05033-&&-Nicotine addiction-%%-hsa04020-&&-Calcium signaling pathway-%%-hsa04724-&&-Glutamatergic synapse-%%-hsa04720-&&-Long-term potentiation-%%-hsa05016-&&-Huntington disease-%%-hsa05030-&&-Cocaine addiction-%%-hsa04014-&&-Ras signaling pathway-%%-hsa04015-&&-Rap1 signaling pathway-%%-hsa05031-&&-Amphetamine addiction-%%-hsa04713-&&-Circadian entrainment-%%-hsa04024-&&-cAMP sign…	GRIN1	Homo sapiens (Human)-&&-9606	taxon:9606	["Gene Symbol-&-1&-GRIN1"]	[""]	FALSE	18	18
DNAJB11	DNAJB11	G:9606:DNAJB11	170627	1902	DnaJ heat shock protein family (Hsp40) member B11	gene	["biological_process-&-1&-GO:0006457-&&-protein folding-%%-GO:0032781-&&-positive regulation of ATPase activity-%%-GO:0036498-&&-IRE1-mediated unfolded protein response","cellular_component-&-1&-GO:0016020-&&-membrane-%%-GO:0005783-&&-endoplasmic reticulum-%%-GO:0005788-&&-endoplasmic reticulum lumen","molecular_function-&-1&-GO:0051082-&&-unfolded protein binding-%%-GO:0005515-&&-protein binding…	["KEGG-&-1&-hsa04141-&&-Protein processing in endoplasmic reticulum"]	DNAJB11	Homo sapiens (Human)-&&-9606	taxon:9606	["Gene Symbol-&-1&-DNAJB11"]	[""]	FALSE	22	22
TRIM28	TRIM28	G:9606:TRIM28	174720	1902	tripartite motif containing 28	gene	["biological_process-&-1&-GO:0000122-&&-negative regulation of transcription from RNA polymerase II promoter-%%-GO:0001837-&&-epithelial to mesenchymal transition-%%-GO:0016567-&&-protein ubiquitination-%%-GO:0006281-&&-DNA repair-%%-GO:0006367-&&-transcription initiation from RNA polymerase II promoter-%%-GO:0007265-&&-Ras protein signal transduction-%%-GO:0007566-&&-embryo implantation-%%-GO:00…	[""]	TRIM28	Homo sapiens (Human)-&&-9606	taxon:9606	["Gene Symbol-&-1&-TRIM28"]	[""]	FALSE	78	118.205	78
AP2B1	AP2B1	G:9606:AP2B1	182913	1902	adaptor related protein complex 2 beta 1 subunit	gene	["biological_process-&-1&-GO:0003281-&&-ventricular septum development-%%-GO:0006886-&&-intracellular protein transport-%%-GO:0006898-&&-receptor-mediated endocytosis-%%-GO:0007018-&&-microtubule-based movement-%%-GO:0019886-&&-antigen processing and presentation of exogenous peptide antigen via MHC class II-%%-GO:0035904-&&-aorta development-%%-GO:0048013-&&-ephrin receptor signaling pathway-%%-…	["KEGG-&-1&-hsa04144-&&-Endocytosis-%%-hsa04721-&&-Synaptic vesicle cycle-%%-hsa05016-&&-Huntington disease-%%-hsa04961-&&-Endocrine and other factor-regulated calcium reabsorption"]	AP2B1	Homo sapiens (Human)-&&-9606	taxon:9606	["Gene Symbol-&-1&-AP2B1"]	[""]	FALSE	39	39
GRIA3	GRIA3	G:9606:GRIA3	180871	1902	glutamate ionotropic receptor AMPA type subunit 3	gene	["biological_process-&-1&-GO:0006810-&&-transport-%%-GO:0007215-&&-glutamate receptor signaling pathway-%%-GO:0034220-&&-ion transmembrane transport-%%-GO:0035235-&&-ionotropic glutamate receptor signaling pathway-%%-GO:0060079-&&-excitatory postsynaptic potential","cellular_component-&-1&-GO:0005886-&&-plasma membrane-%%-GO:0030054-&&-cell junction-%%-GO:0030666-&&-endocytic vesicle membrane-%%-…	["KEGG-&-1&-hsa05033-&&-Nicotine addiction-%%-hsa05031-&&-Amphetamine addiction-%%-hsa04713-&&-Circadian entrainment-%%-hsa04024-&&-cAMP signaling pathway-%%-hsa04723-&&-Retrograde endocannabinoid signaling-%%-hsa04724-&&-Glutamatergic synapse-%%-hsa04080-&&-Neuroactive ligand-receptor interaction-%%-hsa04728-&&-Dopaminergic synapse-%%-hsa05202-&&-Transcriptional misregulation in cancer-%%-hsa047…	GRIA3	Homo sapiens (Human)-&&-9606	taxon:9606	["Gene Symbol-&-1&-GRIA3"]	[""]	FALSE	7	7
AP2A1	AP2A1	G:9606:AP2A1	182916	1902	adaptor related protein complex 2 alpha 1 subunit	gene	["biological_process-&-1&-GO:0006886-&&-intracellular protein transport-%%-GO:0006895-&&-Golgi to endosome transport-%%-GO:0006897-&&-endocytosis-%%-GO:0006898-&&-receptor-mediated endocytosis-%%-GO:0007018-&&-microtubule-based movement-%%-GO:0019886-&&-antigen processing and presentation of exogenous peptide antigen via MHC class II-%%-GO:0048013-&&-ephrin receptor signaling pathway-%%-GO:005069…	["KEGG-&-1&-hsa04144-&&-Endocytosis-%%-hsa04721-&&-Synaptic vesicle cycle-%%-hsa05016-&&-Huntington disease-%%-hsa04961-&&-Endocrine and other factor-regulated calcium reabsorption"]	AP2A1	Homo sapiens (Human)-&&-9606	taxon:9606	["Gene Symbol-&-1&-AP2A1"]	[""]	FALSE	33	33
PPIA	PPIA	G:9606:PPIA	178820	1902	peptidylprolyl isomerase A	gene	["biological_process-&-1&-GO:0000413-&&-protein peptidyl-prolyl isomerization-%%-GO:0006457-&&-protein folding-%%-GO:0006278-&&-RNA-dependent DNA biosynthetic process-%%-GO:0019064-&&-fusion of virus membrane with host plasma membrane-%%-GO:0019058-&&-viral life cycle-%%-GO:0019061-&&-uncoating of virus-%%-GO:0019068-&&-virion assembly-%%-GO:0019076-&&-viral release from host cell-%%-GO:0030260-&…	["KEGG-&-1&-hsa04217-&&-Necroptosis"]	PPIA	Homo sapiens (Human)-&&-9606	taxon:9606	["Gene Symbol-&-1&-PPIA"]	[""]	FALSE	39	39
UIMC1	UIMC1	G:9606:UIMC1	170629	1902	ubiquitin interaction motif containing 1	gene	["biological_process-&-1&-GO:0006302-&&-double-strand break repair-%%-GO:0006303-&&-double-strand break repair via nonhomologous end joining-%%-GO:0006351-&&-transcription, DNA-templated-%%-GO:0010212-&&-response to ionizing radiation-%%-GO:0045892-&&-negative regulation of transcription, DNA-templated-%%-GO:0016579-&&-protein deubiquitination-%%-GO:0031572-&&-G2 DNA damage checkpoint-%%-GO:00457…	["KEGG-&-1&-hsa03440-&&-Homologous recombination"]	UIMC1	Homo sapiens (Human)-&&-9606	taxon:9606	["Gene Symbol-&-1&-UIMC1"]	[""]	FALSE	25	25
ADRB2	ADRB2	G:9606:ADRB2	182922	1902	adrenoceptor beta 2	gene	["biological_process-&-1&-GO:0002024-&&-diet induced thermogenesis-%%-GO:0002025-&&-vasodilation by norepinephrine-epinephrine involved in regulation of systemic arterial blood pressure-%%-GO:0002028-&&-regulation of sodium ion transport-%%-GO:0002032-&&-desensitization of G-protein coupled receptor protein signaling pathway by arrestin-%%-GO:0007267-&&-cell-cell signaling-%%-GO:0006898-&&-recept…	["KEGG-&-1&-hsa04923-&&-Regulation of lipolysis in adipocytes-%%-hsa04970-&&-Salivary secretion-%%-hsa04024-&&-cAMP signaling pathway-%%-hsa04020-&&-Calcium signaling pathway-%%-hsa04022-&&-cGMP-PKG signaling pathway-%%-hsa04080-&&-Neuroactive ligand-receptor interaction-%%-hsa04261-&&-Adrenergic signaling in cardiomyocytes-%%-hsa04924-&&-Renin secretion"]	ADRB2	Homo sapiens (Human)-&&-9606	taxon:9606	["Gene Symbol-&-1&-ADRB2"]	["ADRB2"]	TRUE	258	129.299	258
MED1	MED1	G:9606:MED1	178826	1902	mediator complex subunit 1	gene	["biological_process-&-1&-GO:0000122-&&-negative regulation of transcription from RNA polymerase II promoter-%%-GO:0000902-&&-cell morphogenesis-%%-GO:0001525-&&-angiogenesis-%%-GO:0001889-&&-liver development-%%-GO:0001892-&&-embryonic placenta development-%%-GO:0002088-&&-lens development in camera-type eye-%%-GO:0002154-&&-thyroid hormone mediated signaling pathway-%%-GO:0003222-&&-ventricular…	["KEGG-&-1&-hsa01522-&&-Endocrine resistance-%%-hsa04919-&&-Thyroid hormone signaling pathway"]	MED1	Homo sapiens (Human)-&&-9606	taxon:9606	["Gene Symbol-&-1&-MED1"]	[""]	FALSE	23	23
UGT8	UGT8	G:9606:UGT8	176778	1902	UDP glycosyltransferase 8	gene	["biological_process-&-1&-GO:0002175-&&-protein localization to paranode region of axon-%%-GO:0007010-&&-cytoskeleton organization-%%-GO:0006682-&&-galactosylceramide biosynthetic process-%%-GO:0006687-&&-glycosphingolipid metabolic process-%%-GO:0007417-&&-central nervous system development-%%-GO:0007422-&&-peripheral nervous system development-%%-GO:0030913-&&-paranodal junction assembly-%%-GO:…	["KEGG-&-1&-hsa00565-&&-Ether lipid metabolism-%%-hsa00600-&&-Sphingolipid metabolism-%%-hsa01100-&&-Metabolic pathways"]	UGT8	Homo sapiens (Human)-&&-9606	taxon:9606	["Gene Symbol-&-1&-UGT8"]	[""]	FALSE	4	4
PPARG	PPARG	G:9606:PPARG	178827	1902	peroxisome proliferator activated receptor gamma	gene	["biological_process-&-1&-GO:0000122-&&-negative regulation of transcription from RNA polymerase II promoter-%%-GO:0001890-&&-placenta development-%%-GO:0002674-&&-negative regulation of acute inflammatory response-%%-GO:0007165-&&-signal transduction-%%-GO:0006367-&&-transcription initiation from RNA polymerase II promoter-%%-GO:0006629-&&-lipid metabolic process-%%-GO:0006919-&&-activation of c…	["KEGG-&-1&-hsa05216-&&-Thyroid cancer-%%-hsa05016-&&-Huntington disease-%%-hsa04211-&&-Longevity regulating pathway-%%-hsa04152-&&-AMPK signaling pathway-%%-hsa05200-&&-Pathways in cancer-%%-hsa03320-&&-PPAR signaling pathway-%%-hsa04714-&&-Thermogenesis-%%-hsa05202-&&-Transcriptional misregulation in cancer-%%-hsa04380-&&-Osteoclast differentiation"]	PPARG	Homo sapiens (Human)-&&-9606	taxon:9606	["Gene Symbol-&-1&-PPARG"]	["PPARG"]	TRUE	153	114.784	153
GRK2	GRK2	G:9606:GRK2	182920	1902	G protein-coupled receptor kinase 2	gene	["biological_process-&-1&-GO:0002029-&&-desensitization of G-protein coupled receptor protein signaling pathway-%%-GO:0003108-&&-negative regulation of the force of heart contraction by chemical signal-%%-GO:0007213-&&-G-protein coupled acetylcholine receptor signaling pathway-%%-GO:0007217-&&-tachykinin receptor signaling pathway-%%-GO:0007507-&&-heart development-%%-GO:0019079-&&-viral genome r…	["KEGG-&-1&-hsa04062-&&-Chemokine signaling pathway-%%-hsa04740-&&-Olfactory transduction-%%-hsa04144-&&-Endocytosis-%%-hsa05032-&&-Morphine addiction-%%-hsa04724-&&-Glutamatergic synapse-%%-hsa04340-&&-Hedgehog signaling pathway"]	GRK2	Homo sapiens (Human)-&&-9606	taxon:9606	["Gene Symbol-&-1&-GRK2"]	[""]	FALSE	32	32
ADRB3	ADRB3	G:9606:ADRB3	182921	1902	adrenoceptor beta 3	gene	["biological_process-&-1&-GO:0001659-&&-temperature homeostasis-%%-GO:0002024-&&-diet induced thermogenesis-%%-GO:0002025-&&-vasodilation by norepinephrine-epinephrine involved in regulation of systemic arterial blood pressure-%%-GO:0002032-&&-desensitization of G-protein coupled receptor protein signaling pathway by arrestin-%%-GO:0007267-&&-cell-cell signaling-%%-GO:0005975-&&-carbohydrate meta…	["KEGG-&-1&-hsa04923-&&-Regulation of lipolysis in adipocytes-%%-hsa04970-&&-Salivary secretion-%%-hsa04020-&&-Calcium signaling pathway-%%-hsa04022-&&-cGMP-PKG signaling pathway-%%-hsa04080-&&-Neuroactive ligand-receptor interaction-%%-hsa04714-&&-Thermogenesis-%%-hsa04924-&&-Renin secretion"]	ADRB3	Homo sapiens (Human)-&&-9606	taxon:9606	["Gene Symbol-&-1&-ADRB3"]	[""]	FALSE	4	4
G3BP1	G3BP1	G:9606:G3BP1	174729	1902	G3BP stress granule assembly factor 1	gene	["biological_process-&-1&-GO:0006810-&&-transport-%%-GO:0007265-&&-Ras protein signal transduction-%%-GO:0032508-&&-DNA duplex unwinding-%%-GO:0090090-&&-negative regulation of canonical Wnt signaling pathway-%%-GO:0090305-&&-nucleic acid phosphodiester bond hydrolysis","cellular_component-&-1&-GO:0005886-&&-plasma membrane-%%-GO:0030529-&&-intracellular ribonucleoprotein complex-%%-GO:0005829-&&…	[""]	G3BP1	Homo sapiens (Human)-&&-9606	taxon:9606	["Gene Symbol-&-1&-G3BP1"]	[""]	FALSE	47	47
GRB2	GRB2	G:9606:GRB2	180878	1902	growth factor receptor bound protein 2	gene	["biological_process-&-1&-GO:0000165-&&-MAPK cascade-%%-GO:0007267-&&-cell-cell signaling-%%-GO:0007173-&&-epidermal growth factor receptor signaling pathway-%%-GO:0007265-&&-Ras protein signal transduction-%%-GO:0007411-&&-axon guidance-%%-GO:0007568-&&-aging-%%-GO:0008286-&&-insulin receptor signaling pathway-%%-GO:0008543-&&-fibroblast growth factor receptor signaling pathway-%%-GO:0016032-&&-…	["KEGG-&-1&-hsa04062-&&-Chemokine signaling pathway-%%-hsa04072-&&-Phospholipase D signaling pathway-%%-hsa01522-&&-Endocrine resistance-%%-hsa04510-&&-Focal adhesion-%%-hsa04068-&&-FoxO signaling pathway-%%-hsa01521-&&-EGFR tyrosine kinase inhibitor resistance-%%-hsa05220-&&-Chronic myeloid leukemia-%%-hsa04012-&&-ErbB signaling pathway-%%-hsa04722-&&-Neurotrophin signaling pathway-%%-hsa05160-&…	GRB2	Homo sapiens (Human)-&&-9606	taxon:9606	["Gene Symbol-&-1&-GRB2"]	[""]	FALSE	209	423.041	209
GRB10	GRB10	G:9606:GRB10	180876	1902	growth factor receptor bound protein 10	gene	["biological_process-&-1&-GO:0007411-&&-axon guidance-%%-GO:0030178-&&-negative regulation of Wnt signaling pathway-%%-GO:0030949-&&-positive regulation of vascular endothelial growth factor receptor signaling pathway-%%-GO:0042326-&&-negative regulation of phosphorylation-%%-GO:0046325-&&-negative regulation of glucose import-%%-GO:0046627-&&-negative regulation of insulin receptor signaling pat…	["KEGG-&-1&-hsa04150-&&-mTOR signaling pathway"]	GRB10	Homo sapiens (Human)-&&-9606	taxon:9606	["Gene Symbol-&-1&-GRB10"]	[""]	FALSE	20	20
GPRC5B	GPRC5B	G:9606:GPRC5B	170637	1902	G protein-coupled receptor class C group 5 member B	gene	["biological_process-&-1&-GO:0007186-&&-G-protein coupled receptor signaling pathway-%%-GO:0007626-&&-locomotory behavior-%%-GO:0010976-&&-positive regulation of neuron projection development-%%-GO:0032147-&&-activation of protein kinase activity-%%-GO:0042593-&&-glucose homeostasis-%%-GO:0043123-&&-positive regulation of I-kappaB kinase/NF-kappaB signaling-%%-GO:0045666-&&-positive regulation of…	[""]	GPRC5B	Homo sapiens (Human)-&&-9606	taxon:9606	["Gene Symbol-&-1&-GPRC5B"]	[""]	FALSE	1	1
GRB7	GRB7	G:9606:GRB7	180877	1902	growth factor receptor bound protein 7	gene	["biological_process-&-1&-GO:0007173-&&-epidermal growth factor receptor signaling pathway-%%-GO:0007411-&&-axon guidance-%%-GO:0009967-&&-positive regulation of signal transduction-%%-GO:0017148-&&-negative regulation of translation-%%-GO:0030335-&&-positive regulation of cell migration-%%-GO:0034063-&&-stress granule assembly-%%-GO:0038128-&&-ERBB2 signaling pathway-%%-GO:0050900-&&-leukocyte m…	[""]	GRB7	Homo sapiens (Human)-&&-9606	taxon:9606	["Gene Symbol-&-1&-GRB7"]	[""]	FALSE	14	14
UFD1L	UFD1L	G:9606:UFD1L	176790	1902	ubiquitin fusion degradation 1 like (yeast)	gene	["biological_process-&-1&-GO:0001501-&&-skeletal system development-%%-GO:0006511-&&-ubiquitin-dependent protein catabolic process-%%-GO:0016579-&&-protein deubiquitination-%%-GO:0030970-&&-retrograde protein transport, ER to cytosol-%%-GO:0032480-&&-negative regulation of type I interferon production-%%-GO:0039536-&&-negative regulation of RIG-I signaling pathway-%%-GO:0043161-&&-proteasome-medi…	["KEGG-&-1&-hsa04141-&&-Protein processing in endoplasmic reticulum"]	UFD1L	Homo sapiens (Human)-&&-9606	taxon:9606	["Gene Symbol-&-1&-UFD1L"]	[""]	FALSE	28	28
POU3F3	POU3F3	G:9606:POU3F3	178838	1902	POU class 3 homeobox 3	gene	["biological_process-&-1&-GO:0006351-&&-transcription, DNA-templated-%%-GO:0007417-&&-central nervous system development-%%-GO:0007588-&&-excretion-%%-GO:0043066-&&-negative regulation of apoptotic process-%%-GO:0008284-&&-positive regulation of cell proliferation-%%-GO:0010628-&&-positive regulation of gene expression-%%-GO:0045893-&&-positive regulation of transcription, DNA-templated-%%-GO:004…	[""]	POU3F3	Homo sapiens (Human)-&&-9606	taxon:9606	["Gene Symbol-&-1&-POU3F3"]	[""]	FALSE	2	2
PDIA6	PDIA6	G:9606:PDIA6	174743	1902	protein disulfide isomerase family A member 6	gene	["biological_process-&-1&-GO:0006457-&&-protein folding-%%-GO:0045454-&&-cell redox homeostasis-%%-GO:0034976-&&-response to endoplasmic reticulum stress-%%-GO:0036498-&&-IRE1-mediated unfolded protein response-%%-GO:0043277-&&-apoptotic cell clearance","cellular_component-&-1&-GO:0005886-&&-plasma membrane-%%-GO:0005829-&&-cytosol-%%-GO:0005783-&&-endoplasmic reticulum-%%-GO:0005788-&&-endoplasm…	["KEGG-&-1&-hsa04141-&&-Protein processing in endoplasmic reticulum"]	PDIA6	Homo sapiens (Human)-&&-9606	taxon:9606	["Gene Symbol-&-1&-PDIA6"]	[""]	FALSE	26	26
OPTN	OPTN	G:9606:OPTN	174741	1902	optineurin	gene	["biological_process-&-1&-GO:0000042-&&-protein targeting to Golgi-%%-GO:0000086-&&-G2/M transition of mitotic cell cycle-%%-GO:0001920-&&-negative regulation of receptor recycling-%%-GO:0007165-&&-signal transduction-%%-GO:0007030-&&-Golgi organization-%%-GO:0008219-&&-cell death-%%-GO:0050829-&&-defense response to Gram-negative bacterium-%%-GO:0016236-&&-macroautophagy-%%-GO:0043001-&&-Golgi t…	["KEGG-&-1&-hsa04137-&&-Mitophagy - animal"]	OPTN	Homo sapiens (Human)-&&-9606	taxon:9606	["Gene Symbol-&-1&-OPTN"]	[""]	FALSE	22	22
PARP1	PARP1	G:9606:PARP1	182933	1902	poly(ADP-ribose) polymerase 1	gene	["biological_process-&-1&-GO:0000122-&&-negative regulation of transcription from RNA polymerase II promoter-%%-GO:0000715-&&-nucleotide-excision repair, DNA damage recognition-%%-GO:0000717-&&-nucleotide-excision repair, DNA duplex unwinding-%%-GO:0000724-&&-double-strand break repair via homologous recombination-%%-GO:0006366-&&-transcription from RNA polymerase II promoter-%%-GO:0006273-&&-lag…	["KEGG-&-1&-hsa04064-&&-NF-kappa B signaling pathway-%%-hsa04210-&&-Apoptosis-%%-hsa03410-&&-Base excision repair-%%-hsa04217-&&-Necroptosis"]	PARP1	Homo sapiens (Human)-&&-9606	taxon:9606	["Gene Symbol-&-1&-PARP1"]	[""]	FALSE	112	361.846	112
GRK6	GRK6	G:9606:GRK6	180891	1902	G protein-coupled receptor kinase 6	gene	["biological_process-&-1&-GO:0016055-&&-Wnt signaling pathway-%%-GO:0006468-&&-protein phosphorylation-%%-GO:0008277-&&-regulation of G-protein coupled receptor protein signaling pathway","cellular_component-&-1&-GO:0005886-&&-plasma membrane-%%-GO:0016020-&&-membrane","molecular_function-&-1&-GO:0005515-&&-protein binding-%%-GO:0004703-&&-G-protein coupled receptor kinase activity-%%-GO:0005524-…	["KEGG-&-1&-hsa04062-&&-Chemokine signaling pathway-%%-hsa04144-&&-Endocytosis-%%-hsa05032-&&-Morphine addiction"]	GRK6	Homo sapiens (Human)-&&-9606	taxon:9606	["Gene Symbol-&-1&-GRK6"]	[""]	FALSE	9	9
LRPPRC	LRPPRC	G:9606:LRPPRC	174745	1902	leucine rich pentatricopeptide repeat containing	gene	["biological_process-&-1&-GO:0000961-&&-negative regulation of mitochondrial RNA catabolic process-%%-GO:0006351-&&-transcription, DNA-templated-%%-GO:0006355-&&-regulation of transcription, DNA-templated-%%-GO:0009451-&&-RNA modification-%%-GO:0047497-&&-mitochondrion transport along microtubule-%%-GO:0051028-&&-mRNA transport-%%-GO:0070129-&&-regulation of mitochondrial translation-%%-GO:009030…	[""]	LRPPRC	Homo sapiens (Human)-&&-9606	taxon:9606	["Gene Symbol-&-1&-LRPPRC"]	[""]	FALSE	35	35
PON2	PON2	G:9606:PON2	178847	1902	paraoxonase 2	gene	["biological_process-&-1&-GO:0006979-&&-response to oxidative stress-%%-GO:0009636-&&-response to toxic substance-%%-GO:0019372-&&-lipoxygenase pathway-%%-GO:0019439-&&-aromatic compound catabolic process","cellular_component-&-1&-GO:0005886-&&-plasma membrane-%%-GO:0005764-&&-lysosome-%%-GO:0005739-&&-mitochondrion-%%-GO:0005576-&&-extracellular region-%%-GO:0005634-&&-nucleus","molecular_functi…	[""]	PON2	Homo sapiens (Human)-&&-9606	taxon:9606	["Gene Symbol-&-1&-PON2"]	[""]	FALSE	12	12
JMJD1C	JMJD1C	G:9606:JMJD1C	162460	1902	jumonji domain containing 1C	gene	["biological_process-&-1&-GO:0007596-&&-blood coagulation-%%-GO:0055114-&&-oxidation-reduction process-%%-GO:0006351-&&-transcription, DNA-templated-%%-GO:0006355-&&-regulation of transcription, DNA-templated-%%-GO:0033169-&&-histone H3-K9 demethylation","cellular_component-&-1&-GO:0005622-&&-intracellular-%%-GO:0000785-&&-chromatin-%%-GO:0005634-&&-nucleus-%%-GO:0005654-&&-nucleoplasm","molecula…	["KEGG-&-1&-hsa05202-&&-Transcriptional misregulation in cancer"]	JMJD1C	Homo sapiens (Human)-&&-9606	taxon:9606	["Gene Symbol-&-1&-JMJD1C"]	[""]	FALSE	6	6
POU1F1	POU1F1	G:9606:POU1F1	178844	1902	POU class 1 homeobox 1	gene	["biological_process-&-1&-GO:0000122-&&-negative regulation of transcription from RNA polymerase II promoter-%%-GO:0001708-&&-cell fate specification-%%-GO:0006366-&&-transcription from RNA polymerase II promoter-%%-GO:0006355-&&-regulation of transcription, DNA-templated-%%-GO:0008284-&&-positive regulation of cell proliferation-%%-GO:0008285-&&-negative regulation of cell proliferation-%%-GO:00…	[""]	POU1F1	Homo sapiens (Human)-&&-9606	taxon:9606	["Gene Symbol-&-1&-POU1F1"]	[""]	FALSE	7	7
GRK5	GRK5	G:9606:GRK5	180892	1902	G protein-coupled receptor kinase 5	gene	["biological_process-&-1&-GO:0051726-&&-regulation of cell cycle-%%-GO:0006915-&&-apoptotic process-%%-GO:0016055-&&-Wnt signaling pathway-%%-GO:0007188-&&-adenylate cyclase-modulating G-protein coupled receptor signaling pathway-%%-GO:0007217-&&-tachykinin receptor signaling pathway-%%-GO:0043066-&&-negative regulation of apoptotic process-%%-GO:0008277-&&-regulation of G-protein coupled recepto…	["KEGG-&-1&-hsa04062-&&-Chemokine signaling pathway-%%-hsa04144-&&-Endocytosis-%%-hsa05032-&&-Morphine addiction"]	GRK5	Homo sapiens (Human)-&&-9606	taxon:9606	["Gene Symbol-&-1&-GRK5"]	[""]	FALSE	49	49
UCHL1	UCHL1	G:9606:UCHL1	176797	1902	ubiquitin C-terminal hydrolase L1	gene	["biological_process-&-1&-GO:0002931-&&-response to ischemia-%%-GO:0007412-&&-axon target recognition-%%-GO:0007628-&&-adult walking behavior-%%-GO:0008283-&&-cell proliferation-%%-GO:0016241-&&-regulation of macroautophagy-%%-GO:0016579-&&-protein deubiquitination-%%-GO:0019233-&&-sensory perception of pain-%%-GO:0019896-&&-axonal transport of mitochondrion-%%-GO:0042755-&&-eating behavior-%%-GO…	["KEGG-&-1&-hsa05012-&&-Parkinson disease"]	UCHL1	Homo sapiens (Human)-&&-9606	taxon:9606	["Gene Symbol-&-1&-UCHL1"]	[""]	FALSE	26	26
POR	POR	G:9606:POR	178845	1902	cytochrome p450 oxidoreductase	gene	["biological_process-&-1&-GO:0003420-&&-regulation of growth plate cartilage chondrocyte proliferation-%%-GO:0055114-&&-oxidation-reduction process-%%-GO:0006805-&&-xenobiotic metabolic process-%%-GO:0007584-&&-response to nutrient-%%-GO:0042493-&&-response to drug-%%-GO:0009437-&&-carnitine metabolic process-%%-GO:0009812-&&-flavonoid metabolic process-%%-GO:0018393-&&-internal peptidyl-lysine a…	[""]	POR	Homo sapiens (Human)-&&-9606	taxon:9606	["Gene Symbol-&-1&-POR"]	[""]	FALSE	14	14
HNRNPA3	HNRNPA3	G:9606:HNRNPA3	162465	1902	heterogeneous nuclear ribonucleoprotein A3	gene	["biological_process-&-1&-GO:0000398-&&-mRNA splicing, via spliceosome-%%-GO:0010467-&&-gene expression-%%-GO:0051028-&&-mRNA transport","cellular_component-&-1&-GO:0030529-&&-intracellular ribonucleoprotein complex-%%-GO:0005634-&&-nucleus-%%-GO:0005737-&&-cytoplasm-%%-GO:0005654-&&-nucleoplasm-%%-GO:0043005-&&-neuron projection-%%-GO:0035770-&&-ribonucleoprotein granule-%%-GO:0071013-&&-catalyt…	["KEGG-&-1&-hsa03040-&&-Spliceosome"]	HNRNPA3	Homo sapiens (Human)-&&-9606	taxon:9606	["Gene Symbol-&-1&-HNRNPA3"]	[""]	FALSE	58	58
UBE2N	UBE2N	G:9606:UBE2N	176806	1902	ubiquitin conjugating enzyme E2 N	gene	["biological_process-&-1&-GO:0000187-&&-activation of MAPK activity-%%-GO:0000724-&&-double-strand break repair via homologous recombination-%%-GO:0000729-&&-DNA double-strand break processing-%%-GO:0002223-&&-stimulatory C-type lectin receptor signaling pathway-%%-GO:0016567-&&-protein ubiquitination-%%-GO:0006282-&&-regulation of DNA repair-%%-GO:0006301-&&-postreplication repair-%%-GO:0006303-…	["KEGG-&-1&-hsa04120-&&-Ubiquitin mediated proteolysis"]	UBE2N	Homo sapiens (Human)-&&-9606	taxon:9606	["Gene Symbol-&-1&-UBE2N"]	[""]	FALSE	30	30
GPR37	GPR37	G:9606:GPR37	180900	1902	G protein-coupled receptor 37	gene	["biological_process-&-1&-GO:0007186-&&-G-protein coupled receptor signaling pathway-%%-GO:0007193-&&-adenylate cyclase-inhibiting G-protein coupled receptor signaling pathway-%%-GO:0031987-&&-locomotion involved in locomotory behavior-%%-GO:0042416-&&-dopamine biosynthetic process-%%-GO:0043410-&&-positive regulation of MAPK cascade-%%-GO:0045964-&&-positive regulation of dopamine metabolic proc…	["KEGG-&-1&-hsa05012-&&-Parkinson disease"]	GPR37	Homo sapiens (Human)-&&-9606	taxon:9606	["Gene Symbol-&-1&-GPR37"]	[""]	FALSE	11	11
UBE2I	UBE2I	G:9606:UBE2I	176809	1902	ubiquitin conjugating enzyme E2 I	gene	["biological_process-&-1&-GO:0007059-&&-chromosome segregation-%%-GO:0000122-&&-negative regulation of transcription from RNA polymerase II promoter-%%-GO:0006464-&&-cellular protein modification process-%%-GO:0006511-&&-ubiquitin-dependent protein catabolic process-%%-GO:0007067-&&-mitotic nuclear division-%%-GO:0016032-&&-viral process-%%-GO:0045892-&&-negative regulation of transcription, DNA-…	["KEGG-&-1&-hsa04120-&&-Ubiquitin mediated proteolysis-%%-hsa04064-&&-NF-kappa B signaling pathway-%%-hsa03013-&&-RNA transport-%%-hsa05206-&&-MicroRNAs in cancer"]	UBE2I	Homo sapiens (Human)-&&-9606	taxon:9606	["Gene Symbol-&-1&-UBE2I"]	[""]	FALSE	126	283.011	126
ACO2	ACO2	G:9606:ACO2	182953	1902	aconitase 2	gene	["biological_process-&-1&-GO:0001889-&&-liver development-%%-GO:0006091-&&-generation of precursor metabolites and energy-%%-GO:0006099-&&-tricarboxylic acid cycle-%%-GO:0006101-&&-citrate metabolic process-%%-GO:0006102-&&-isocitrate metabolic process-%%-GO:0035900-&&-response to isolation stress","cellular_component-&-1&-GO:0005739-&&-mitochondrion-%%-GO:0005759-&&-mitochondrial matrix-%%-GO:00…	["KEGG-&-1&-hsa01230-&&-Biosynthesis of amino acids-%%-hsa00020-&&-Citrate cycle (TCA cycle)-%%-hsa01200-&&-Carbon metabolism-%%-hsa00630-&&-Glyoxylate and dicarboxylate metabolism-%%-hsa01210-&&-2-Oxocarboxylic acid metabolism-%%-hsa01100-&&-Metabolic pathways"]	ACO2	Homo sapiens (Human)-&&-9606	taxon:9606	["Gene Symbol-&-1&-ACO2"]	[""]	FALSE	10	10
CCR2	CCR2	G:9606:CCR2	154286	1902	C-C motif chemokine receptor 2	gene	["biological_process-&-1&-GO:0001974-&&-blood vessel remodeling-%%-GO:0002407-&&-dendritic cell chemotaxis-%%-GO:0002827-&&-positive regulation of T-helper 1 type immune response-%%-GO:0002829-&&-negative regulation of type 2 immune response-%%-GO:0006874-&&-cellular calcium ion homeostasis-%%-GO:0006935-&&-chemotaxis-%%-GO:0006954-&&-inflammatory response-%%-GO:0006955-&&-immune response-%%-GO:0…	["KEGG-&-1&-hsa04062-&&-Chemokine signaling pathway-%%-hsa04060-&&-Cytokine-cytokine receptor interaction"]	CCR2	Homo sapiens (Human)-&&-9606	taxon:9606	["Gene Symbol-&-1&-CCR2"]	[""]	FALSE	5	5
PPIL1	PPIL1	G:9606:PPIL1	170671	1902	peptidylprolyl isomerase like 1	gene	["biological_process-&-1&-GO:0000398-&&-mRNA splicing, via spliceosome-%%-GO:0000413-&&-protein peptidyl-prolyl isomerization-%%-GO:0006457-&&-protein folding","cellular_component-&-1&-GO:0005654-&&-nucleoplasm-%%-GO:0070062-&&-extracellular exosome-%%-GO:0071013-&&-catalytic step 2 spliceosome","molecular_function-&-1&-GO:0005515-&&-protein binding-%%-GO:0003755-&&-peptidyl-prolyl cis-trans isom…	["KEGG-&-1&-hsa03040-&&-Spliceosome"]	PPIL1	Homo sapiens (Human)-&&-9606	taxon:9606	["Gene Symbol-&-1&-PPIL1"]	[""]	FALSE	9	9
MRPS23	MRPS23	G:9606:MRPS23	170668	1902	mitochondrial ribosomal protein S23	gene	["biological_process-&-1&-GO:0070125-&&-mitochondrial translational elongation-%%-GO:0070126-&&-mitochondrial translational termination","cellular_component-&-1&-GO:0005739-&&-mitochondrion-%%-GO:0005840-&&-ribosome-%%-GO:0005743-&&-mitochondrial inner membrane-%%-GO:0031965-&&-nuclear membrane-%%-GO:0045111-&&-intermediate filament cytoskeleton","molecular_function-&-1&-GO:0005515-&&-protein bin…	[""]	MRPS23	Homo sapiens (Human)-&&-9606	taxon:9606	["Gene Symbol-&-1&-MRPS23"]	[""]	FALSE	15	15
SF3B6	SF3B6	G:9606:SF3B6	170674	1902	splicing factor 3b subunit 6	gene	["biological_process-&-1&-GO:0000398-&&-mRNA splicing, via spliceosome-%%-GO:0001825-&&-blastocyst formation","cellular_component-&-1&-GO:0005654-&&-nucleoplasm-%%-GO:0005684-&&-U2-type spliceosomal complex-%%-GO:0005686-&&-U2 snRNP-%%-GO:0005689-&&-U12-type spliceosomal complex-%%-GO:0071011-&&-precatalytic spliceosome-%%-GO:0071013-&&-catalytic step 2 spliceosome","molecular_function-&-1&-GO:00…	["KEGG-&-1&-hsa03040-&&-Spliceosome"]	SF3B6	Homo sapiens (Human)-&&-9606	taxon:9606	["Gene Symbol-&-1&-SF3B6"]	[""]	FALSE	26	26
ACAT1	ACAT1	G:9606:ACAT1	182962	1902	acetyl-CoA acetyltransferase 1	gene	["biological_process-&-1&-GO:0001889-&&-liver development-%%-GO:0006085-&&-acetyl-CoA biosynthetic process-%%-GO:0006550-&&-isoleucine catabolic process-%%-GO:0006635-&&-fatty acid beta-oxidation-%%-GO:0007420-&&-brain development-%%-GO:0009083-&&-branched-chain amino acid catabolic process-%%-GO:0009725-&&-response to hormone-%%-GO:0014070-&&-response to organic cyclic compound-%%-GO:0015936-&&-…	["KEGG-&-1&-hsa00380-&&-Tryptophan metabolism-%%-hsa00071-&&-Fatty acid degradation-%%-hsa01212-&&-Fatty acid metabolism-%%-hsa00620-&&-Pyruvate metabolism-%%-hsa00630-&&-Glyoxylate and dicarboxylate metabolism-%%-hsa01200-&&-Carbon metabolism-%%-hsa00640-&&-Propanoate metabolism-%%-hsa00280-&&-Valine, leucine and isoleucine degradation-%%-hsa00310-&&-Lysine degradation-%%-hsa00650-&&-Butanoate m…	ACAT1	Homo sapiens (Human)-&&-9606	taxon:9606	["Gene Symbol-&-1&-ACAT1"]	[""]	FALSE	21	21
ZBTB20	ZBTB20	G:9606:ZBTB20	172727	1902	zinc finger and BTB domain containing 20	gene	["biological_process-&-1&-GO:0000122-&&-negative regulation of transcription from RNA polymerase II promoter-%%-GO:0006351-&&-transcription, DNA-templated-%%-GO:0032728-&&-positive regulation of interferon-beta production-%%-GO:0032755-&&-positive regulation of interleukin-6 production-%%-GO:0032760-&&-positive regulation of tumor necrosis factor production","cellular_component-&-1&-GO:0005634-&&…	[""]	ZBTB20	Homo sapiens (Human)-&&-9606	taxon:9606	["Gene Symbol-&-1&-ZBTB20"]	[""]	FALSE	8	8
ARPC3	ARPC3	G:9606:ARPC3	174775	1902	actin related protein 2/3 complex subunit 3	gene	["biological_process-&-1&-GO:0006928-&&-movement of cell or subcellular component-%%-GO:0034314-&&-Arp2/3 complex-mediated actin nucleation-%%-GO:0038096-&&-Fc-gamma receptor signaling pathway involved in phagocytosis-%%-GO:0048013-&&-ephrin receptor signaling pathway-%%-GO:0061024-&&-membrane organization-%%-GO:1990090-&&-cellular response to nerve growth factor stimulus","cellular_component-&-1…	["KEGG-&-1&-hsa05132-&&-Salmonella infection-%%-hsa05131-&&-Shigellosis-%%-hsa04810-&&-Regulation of actin cytoskeleton-%%-hsa04144-&&-Endocytosis-%%-hsa05100-&&-Bacterial invasion of epithelial cells-%%-hsa04666-&&-Fc gamma R-mediated phagocytosis-%%-hsa05130-&&-Pathogenic Escherichia coli infection"]	ARPC3	Homo sapiens (Human)-&&-9606	taxon:9606	["Gene Symbol-&-1&-ARPC3"]	[""]	FALSE	23	23
UBB	UBB	G:9606:UBB	176820	1902	ubiquitin B	gene	["biological_process-&-1&-GO:0000086-&&-G2/M transition of mitotic cell cycle-%%-GO:0000122-&&-negative regulation of transcription from RNA polymerase II promoter-%%-GO:0000165-&&-MAPK cascade-%%-GO:0000187-&&-activation of MAPK activity-%%-GO:0000209-&&-protein polyubiquitination-%%-GO:0042787-&&-protein ubiquitination involved in ubiquitin-dependent protein catabolic process-%%-GO:0000715-&&-n…	["KEGG-&-1&-hsa04137-&&-Mitophagy - animal-%%-hsa04144-&&-Endocytosis-%%-hsa05012-&&-Parkinson disease-%%-hsa05167-&&-Kaposi sarcoma-associated herpesvirus infection"]	UBB	Homo sapiens (Human)-&&-9606	taxon:9606	["Gene Symbol-&-1&-UBB"]	[""]	FALSE	58	58
ACTR2	ACTR2	G:9606:ACTR2	174772	1902	ARP2 actin related protein 2 homolog	gene	["biological_process-&-1&-GO:0006928-&&-movement of cell or subcellular component-%%-GO:0007163-&&-establishment or maintenance of cell polarity-%%-GO:0008306-&&-associative learning-%%-GO:0008356-&&-asymmetric cell division-%%-GO:0060271-&&-cilium assembly-%%-GO:0016344-&&-meiotic chromosome movement towards spindle pole-%%-GO:0016482-&&-cytosolic transport-%%-GO:0033206-&&-meiotic cytokinesis-%…	["KEGG-&-1&-hsa04530-&&-Tight junction"]	ACTR2	Homo sapiens (Human)-&&-9606	taxon:9606	["Gene Symbol-&-1&-ACTR2"]	[""]	FALSE	38	38
U2AF1	U2AF1	G:9606:U2AF1	176825	1902	U2 small nuclear RNA auxiliary factor 1	gene	["biological_process-&-1&-GO:0000398-&&-mRNA splicing, via spliceosome-%%-GO:0006369-&&-termination of RNA polymerase II transcription-%%-GO:0006397-&&-mRNA processing-%%-GO:0006405-&&-RNA export from nucleus-%%-GO:0006406-&&-mRNA export from nucleus-%%-GO:0008380-&&-RNA splicing-%%-GO:0031124-&&-mRNA 3'-end processing-%%-GO:1903146-&&-regulation of mitophagy-%%-GO:1903955-&&-positive regulation …	["KEGG-&-1&-hsa05131-&&-Shigellosis-%%-hsa03040-&&-Spliceosome"]	U2AF1	Homo sapiens (Human)-&&-9606	taxon:9606	["Gene Symbol-&-1&-U2AF1"]	[""]	FALSE	36	36
FGFR1OP2	FGFR1OP2	G:9606:FGFR1OP2	172734	1902	FGFR1 oncogene partner 2	gene	["biological_process-&-1&-GO:0018108-&&-peptidyl-tyrosine phosphorylation-%%-GO:0042060-&&-wound healing","cellular_component-&-1&-GO:0005829-&&-cytosol","molecular_function-&-1&-GO:0005515-&&-protein binding-%%-GO:0004713-&&-protein tyrosine kinase activity-%%-GO:0042803-&&-protein homodimerization activity"]	[""]	FGFR1OP2	Homo sapiens (Human)-&&-9606	taxon:9606	["Gene Symbol-&-1&-FGFR1OP2"]	[""]	FALSE	20	20
ABL1	ABL1	G:9606:ABL1	182975	1902	ABL proto-oncogene 1, non-receptor tyrosine kinase	gene	["biological_process-&-1&-GO:0001843-&&-neural tube closure-%%-GO:0001922-&&-B-1 B cell homeostasis-%%-GO:0001934-&&-positive regulation of protein phosphorylation-%%-GO:0002322-&&-B cell proliferation involved in immune response-%%-GO:0002333-&&-transitional one stage B cell differentiation-%%-GO:0030036-&&-actin cytoskeleton organization-%%-GO:0006298-&&-mismatch repair-%%-GO:0006355-&&-regulat…	["KEGG-&-1&-hsa04110-&&-Cell cycle-%%-hsa05131-&&-Shigellosis-%%-hsa05206-&&-MicroRNAs in cancer-%%-hsa04012-&&-ErbB signaling pathway-%%-hsa05220-&&-Chronic myeloid leukemia-%%-hsa05130-&&-Pathogenic Escherichia coli infection-%%-hsa04722-&&-Neurotrophin signaling pathway-%%-hsa04360-&&-Axon guidance-%%-hsa05416-&&-Viral myocarditis-%%-hsa05200-&&-Pathways in cancer-%%-hsa04014-&&-Ras signaling …	ABL1	Homo sapiens (Human)-&&-9606	taxon:9606	["Gene Symbol-&-1&-ABL1"]	[""]	FALSE	93	179.223	93
ABL2	ABL2	G:9606:ABL2	182973	1902	ABL proto-oncogene 2, non-receptor tyrosine kinase	gene	["biological_process-&-1&-GO:0007155-&&-cell adhesion-%%-GO:0007165-&&-signal transduction-%%-GO:0007169-&&-transmembrane receptor protein tyrosine kinase signaling pathway-%%-GO:0006464-&&-cellular protein modification process-%%-GO:0007204-&&-positive regulation of cytosolic calcium ion concentration-%%-GO:0010506-&&-regulation of autophagy-%%-GO:0010863-&&-positive regulation of phospholipase …	["KEGG-&-1&-hsa04012-&&-ErbB signaling pathway-%%-hsa05416-&&-Viral myocarditis-%%-hsa04014-&&-Ras signaling pathway"]	ABL2	Homo sapiens (Human)-&&-9606	taxon:9606	["Gene Symbol-&-1&-ABL2"]	[""]	FALSE	20	20
OR10B1P	OR10B1P	G:9606:OR10B1P	158402	1902	olfactory receptor family 10 subfamily B member 1 pseudogene	gene	[""]	[""]	OR10B1P	Homo sapiens (Human)-&&-9606	taxon:9606	["Gene Symbol-&-1&-OR10B1P"]	[""]	FALSE	15	15
TXNRD1	TXNRD1	G:9606:TXNRD1	176835	1902	thioredoxin reductase 1	gene	["biological_process-&-1&-GO:0000302-&&-response to reactive oxygen species-%%-GO:0000305-&&-response to oxygen radical-%%-GO:0001887-&&-selenium compound metabolic process-%%-GO:0007165-&&-signal transduction-%%-GO:0055114-&&-oxidation-reduction process-%%-GO:0045454-&&-cell redox homeostasis-%%-GO:0015949-&&-nucleobase-containing small molecule interconversion-%%-GO:0098869-&&-cellular oxidant …	["KEGG-&-1&-hsa05225-&&-Hepatocellular carcinoma-%%-hsa05200-&&-Pathways in cancer-%%-hsa00450-&&-Selenocompound metabolism"]	TXNRD1	Homo sapiens (Human)-&&-9606	taxon:9606	["Gene Symbol-&-1&-TXNRD1"]	[""]	FALSE	9	9
TYMS	TYMS	G:9606:TYMS	176833	1902	thymidylate synthetase	gene	["biological_process-&-1&-GO:0000082-&&-G1/S transition of mitotic cell cycle-%%-GO:0000083-&&-regulation of transcription involved in G1/S transition of mitotic cell cycle-%%-GO:0016049-&&-cell growth-%%-GO:0006231-&&-dTMP biosynthetic process-%%-GO:0006235-&&-dTTP biosynthetic process-%%-GO:0006417-&&-regulation of translation-%%-GO:0007568-&&-aging-%%-GO:0007623-&&-circadian rhythm-%%-GO:00466…	["KEGG-&-1&-hsa00670-&&-One carbon pool by folate-%%-hsa01523-&&-Antifolate resistance-%%-hsa00240-&&-Pyrimidine metabolism-%%-hsa01100-&&-Metabolic pathways"]	TYMS	Homo sapiens (Human)-&&-9606	taxon:9606	["Gene Symbol-&-1&-TYMS"]	[""]	FALSE	10	10
RANBP9	RANBP9	G:9606:RANBP9	174789	1902	RAN binding protein 9	gene	["biological_process-&-1&-GO:0000165-&&-MAPK cascade-%%-GO:0006461-&&-protein complex assembly-%%-GO:0007020-&&-microtubule nucleation-%%-GO:0007411-&&-axon guidance-%%-GO:0043547-&&-positive regulation of GTPase activity-%%-GO:0070373-&&-negative regulation of ERK1 and ERK2 cascade","cellular_component-&-1&-GO:0005886-&&-plasma membrane-%%-GO:0005829-&&-cytosol-%%-GO:0005634-&&-nucleus-%%-GO:000…	[""]	RANBP9	Homo sapiens (Human)-&&-9606	taxon:9606	["Gene Symbol-&-1&-RANBP9"]	[""]	FALSE	46	46
AARS	AARS	G:9606:AARS	182984	1902	alanyl-tRNA synthetase	gene	["biological_process-&-1&-GO:0001942-&&-hair follicle development-%%-GO:0006457-&&-protein folding-%%-GO:0006400-&&-tRNA modification-%%-GO:0006418-&&-tRNA aminoacylation for protein translation-%%-GO:0006419-&&-alanyl-tRNA aminoacylation-%%-GO:0006450-&&-regulation of translational fidelity-%%-GO:0008033-&&-tRNA processing-%%-GO:0021680-&&-cerebellar Purkinje cell layer development-%%-GO:0030968…	["KEGG-&-1&-hsa00970-&&-Aminoacyl-tRNA biosynthesis"]	AARS	Homo sapiens (Human)-&&-9606	taxon:9606	["Gene Symbol-&-1&-AARS"]	[""]	FALSE	20	20
SH2D3C	SH2D3C	G:9606:SH2D3C	174793	1902	SH2 domain containing 3C	gene	["biological_process-&-1&-GO:0007254-&&-JNK cascade-%%-GO:0007264-&&-small GTPase mediated signal transduction-%%-GO:0009967-&&-positive regulation of signal transduction-%%-GO:0043547-&&-positive regulation of GTPase activity","cellular_component-&-1&-GO:0016020-&&-membrane-%%-GO:0005737-&&-cytoplasm","molecular_function-&-1&-GO:0005515-&&-protein binding-%%-GO:0005070-&&-SH3/SH2 adaptor activit…	[""]	SH2D3C	Homo sapiens (Human)-&&-9606	taxon:9606	["Gene Symbol-&-1&-SH2D3C"]	[""]	FALSE	7	7
PML	PML	G:9606:PML	178894	1902	promyelocytic leukemia	gene	["biological_process-&-1&-GO:0001666-&&-response to hypoxia-%%-GO:0001932-&&-regulation of protein phosphorylation-%%-GO:0006351-&&-transcription, DNA-templated-%%-GO:0006355-&&-regulation of transcription, DNA-templated-%%-GO:0006461-&&-protein complex assembly-%%-GO:0006919-&&-activation of cysteine-type endopeptidase activity involved in apoptotic process-%%-GO:0006977-&&-DNA damage response, …	["KEGG-&-1&-hsa04120-&&-Ubiquitin mediated proteolysis-%%-hsa05221-&&-Acute myeloid leukemia-%%-hsa04144-&&-Endocytosis-%%-hsa05168-&&-Herpes simplex infection-%%-hsa05164-&&-Influenza A-%%-hsa05200-&&-Pathways in cancer-%%-hsa05202-&&-Transcriptional misregulation in cancer"]	PML	Homo sapiens (Human)-&&-9606	taxon:9606	["Gene Symbol-&-1&-PML"]	[""]	FALSE	70	123.65	70
TUFM	TUFM	G:9606:TUFM	176846	1902	Tu translation elongation factor, mitochondrial	gene	["biological_process-&-1&-GO:0006414-&&-translational elongation-%%-GO:0045471-&&-response to ethanol","cellular_component-&-1&-GO:0016020-&&-membrane-%%-GO:0005739-&&-mitochondrion-%%-GO:0005743-&&-mitochondrial inner membrane-%%-GO:0042645-&&-mitochondrial nucleoid-%%-GO:0043209-&&-myelin sheath-%%-GO:0070062-&&-extracellular exosome","molecular_function-&-1&-GO:0005515-&&-protein binding-%%-GO…	[""]	TUFM	Homo sapiens (Human)-&&-9606	taxon:9606	["Gene Symbol-&-1&-TUFM"]	[""]	FALSE	70	64.551	70
NAT2	NAT2	G:9606:NAT2	182990	1902	N-acetyltransferase 2	gene	["biological_process-&-1&-GO:0006805-&&-xenobiotic metabolic process-%%-GO:1902475-&&-L-alpha-amino acid transmembrane transport","cellular_component-&-1&-GO:0005886-&&-plasma membrane-%%-GO:0005829-&&-cytosol","molecular_function-&-1&-GO:0005515-&&-protein binding-%%-GO:0004060-&&-arylamine N-acetyltransferase activity-%%-GO:0015179-&&-L-amino acid transmembrane transporter activity"]	["KEGG-&-1&-hsa00232-&&-Caffeine metabolism-%%-hsa01100-&&-Metabolic pathways-%%-hsa00983-&&-Drug metabolism - other enzymes-%%-hsa05204-&&-Chemical carcinogenesis"]	NAT2	Homo sapiens (Human)-&&-9606	taxon:9606	["Gene Symbol-&-1&-NAT2"]	[""]	FALSE	5	5
NAT1	NAT1	G:9606:NAT1	182991	1902	N-acetyltransferase 1	gene	["biological_process-&-1&-GO:0006805-&&-xenobiotic metabolic process","cellular_component-&-1&-GO:0005829-&&-cytosol","molecular_function-&-1&-GO:0004060-&&-arylamine N-acetyltransferase activity"]	["KEGG-&-1&-hsa00232-&&-Caffeine metabolism-%%-hsa01100-&&-Metabolic pathways-%%-hsa00983-&&-Drug metabolism - other enzymes-%%-hsa05204-&&-Chemical carcinogenesis"]	NAT1	Homo sapiens (Human)-&&-9606	taxon:9606	["Gene Symbol-&-1&-NAT1"]	[""]	FALSE	2	2
SERPINA3	SERPINA3	G:9606:SERPINA3	182988	1902	serpin family A member 3	gene	["biological_process-&-1&-GO:0002576-&&-platelet degranulation-%%-GO:0006953-&&-acute-phase response-%%-GO:0006954-&&-inflammatory response-%%-GO:0010951-&&-negative regulation of endopeptidase activity-%%-GO:0019216-&&-regulation of lipid metabolic process-%%-GO:0030277-&&-maintenance of gastrointestinal epithelium-%%-GO:0043312-&&-neutrophil degranulation","cellular_component-&-1&-GO:0005622-&&…	[""]	SERPINA3	Homo sapiens (Human)-&&-9606	taxon:9606	["Gene Symbol-&-1&-SERPINA3"]	[""]	FALSE	12	12
TUBA4A	TUBA4A	G:9606:TUBA4A	176850	1902	tubulin alpha 4a	gene	["biological_process-&-1&-GO:0007017-&&-microtubule-based process-%%-GO:0000086-&&-G2/M transition of mitotic cell cycle-%%-GO:0002576-&&-platelet degranulation-%%-GO:0007010-&&-cytoskeleton organization-%%-GO:0097711-&&-ciliary basal body docking","cellular_component-&-1&-GO:0005576-&&-extracellular region-%%-GO:0005829-&&-cytosol-%%-GO:0005874-&&-microtubule-%%-GO:0015630-&&-microtubule cytoske…	["KEGG-&-1&-hsa04540-&&-Gap junction-%%-hsa04210-&&-Apoptosis-%%-hsa05130-&&-Pathogenic Escherichia coli infection-%%-hsa04145-&&-Phagosome-%%-hsa04530-&&-Tight junction"]	TUBA4A	Homo sapiens (Human)-&&-9606	taxon:9606	["Gene Symbol-&-1&-TUBA4A"]	[""]	FALSE	52	52
TUBB2A	TUBB2A	G:9606:TUBB2A	176848	1902	tubulin beta 2A class IIa	gene	["biological_process-&-1&-GO:0007017-&&-microtubule-based process-%%-GO:0007010-&&-cytoskeleton organization","cellular_component-&-1&-GO:0005634-&&-nucleus-%%-GO:0005737-&&-cytoplasm-%%-GO:0005874-&&-microtubule-%%-GO:0015630-&&-microtubule cytoskeleton-%%-GO:0070062-&&-extracellular exosome-%%-GO:1903561-&&-extracellular vesicle","molecular_function-&-1&-GO:0005515-&&-protein binding-%%-GO:0003…	["KEGG-&-1&-hsa04540-&&-Gap junction-%%-hsa05130-&&-Pathogenic Escherichia coli infection-%%-hsa04145-&&-Phagosome"]	TUBB2A	Homo sapiens (Human)-&&-9606	taxon:9606	["Gene Symbol-&-1&-TUBB2A"]	[""]	FALSE	37	37
A2M	A2M	G:9606:A2M	182993	1902	alpha-2-macroglobulin	gene	["biological_process-&-1&-GO:0001869-&&-negative regulation of complement activation, lectin pathway-%%-GO:0002576-&&-platelet degranulation-%%-GO:0007597-&&-blood coagulation, intrinsic pathway-%%-GO:0010951-&&-negative regulation of endopeptidase activity-%%-GO:0022617-&&-extracellular matrix disassembly-%%-GO:0043547-&&-positive regulation of GTPase activity-%%-GO:0048863-&&-stem cell differen…	["KEGG-&-1&-hsa04610-&&-Complement and coagulation cascades"]	A2M	Homo sapiens (Human)-&&-9606	taxon:9606	["Gene Symbol-&-1&-A2M"]	[""]	FALSE	24	24
TMEM25	TMEM25	G:9606:TMEM25	166614	1902	transmembrane protein 25	gene	["cellular_component-&-1&-GO:0005886-&&-plasma membrane-%%-GO:0016021-&&-integral component of membrane-%%-GO:0005576-&&-extracellular region","molecular_function-&-1&-GO:0005515-&&-protein binding"]	[""]	TMEM25	Homo sapiens (Human)-&&-9606	taxon:9606	["Gene Symbol-&-1&-TMEM25"]	[""]	FALSE	8	8
WNK1	WNK1	G:9606:WNK1	168660	1902	WNK lysine deficient protein kinase 1	gene	["biological_process-&-1&-GO:0002028-&&-regulation of sodium ion transport-%%-GO:0003084-&&-positive regulation of systemic arterial blood pressure-%%-GO:0035556-&&-intracellular signal transduction-%%-GO:0006468-&&-protein phosphorylation-%%-GO:0006811-&&-ion transport-%%-GO:0010923-&&-negative regulation of phosphatase activity-%%-GO:0018107-&&-peptidyl-threonine phosphorylation-%%-GO:0023016-&…	[""]	WNK1	Homo sapiens (Human)-&&-9606	taxon:9606	["Gene Symbol-&-1&-WNK1"]	[""]	FALSE	23	23
PCSK9	PCSK9	G:9606:PCSK9	162521	1902	proprotein convertase subtilisin/kexin type 9	gene	["biological_process-&-1&-GO:0001822-&&-kidney development-%%-GO:0001889-&&-liver development-%%-GO:0001920-&&-negative regulation of receptor recycling-%%-GO:0002092-&&-positive regulation of receptor internalization-%%-GO:0006915-&&-apoptotic process-%%-GO:0006641-&&-triglyceride metabolic process-%%-GO:0006644-&&-phospholipid metabolic process-%%-GO:0006898-&&-receptor-mediated endocytosis-%%-…	["KEGG-&-1&-hsa04979-&&-Cholesterol metabolism"]	PCSK9	Homo sapiens (Human)-&&-9606	taxon:9606	["Gene Symbol-&-1&-PCSK9"]	[""]	FALSE	11	11
HIST1H2BA	HIST1H2BA	G:9606:HIST1H2BA	162526	1902	histone cluster 1 H2B family member a	gene	["biological_process-&-1&-GO:0006334-&&-nucleosome assembly-%%-GO:0016567-&&-protein ubiquitination-%%-GO:0006337-&&-nucleosome disassembly-%%-GO:0006954-&&-inflammatory response-%%-GO:0031639-&&-plasminogen activation-%%-GO:0035093-&&-spermatogenesis, exchange of chromosomal proteins-%%-GO:0051099-&&-positive regulation of binding-%%-GO:0071674-&&-mononuclear cell migration","cellular_component-…	["KEGG-&-1&-hsa05322-&&-Systemic lupus erythematosus-%%-hsa05034-&&-Alcoholism-%%-hsa05203-&&-Viral carcinogenesis"]	HIST1H2BA	Homo sapiens (Human)-&&-9606	taxon:9606	["Gene Symbol-&-1&-HIST1H2BA"]	[""]	FALSE	27	27
PDCD6	PDCD6	G:9606:PDCD6	174814	1902	programmed cell death 6	gene	["biological_process-&-1&-GO:0001525-&&-angiogenesis-%%-GO:0001938-&&-positive regulation of endothelial cell proliferation-%%-GO:0006508-&&-proteolysis-%%-GO:0006886-&&-intracellular protein transport-%%-GO:0006919-&&-activation of cysteine-type endopeptidase activity involved in apoptotic process-%%-GO:0010595-&&-positive regulation of endothelial cell migration-%%-GO:0030948-&&-negative regula…	[""]	PDCD6	Homo sapiens (Human)-&&-9606	taxon:9606	["Gene Symbol-&-1&-PDCD6"]	[""]	FALSE	34	34
PDCD6IP	PDCD6IP	G:9606:PDCD6IP	174815	1902	programmed cell death 6 interacting protein	gene	["biological_process-&-1&-GO:0000915-&&-actomyosin contractile ring assembly-%%-GO:0000920-&&-cell separation after cytokinesis-%%-GO:0006915-&&-apoptotic process-%%-GO:0006997-&&-nucleus organization-%%-GO:0007080-&&-mitotic metaphase plate congression-%%-GO:0010824-&&-regulation of centrosome duplication-%%-GO:0015031-&&-protein transport-%%-GO:0019058-&&-viral life cycle-%%-GO:0036258-&&-multi…	["KEGG-&-1&-hsa04144-&&-Endocytosis"]	PDCD6IP	Homo sapiens (Human)-&&-9606	taxon:9606	["Gene Symbol-&-1&-PDCD6IP"]	[""]	FALSE	36	36
ACKR4	ACKR4	G:9606:ACKR4	170720	1902	atypical chemokine receptor 4	gene	["biological_process-&-1&-GO:0006898-&&-receptor-mediated endocytosis-%%-GO:0006935-&&-chemotaxis-%%-GO:0006955-&&-immune response-%%-GO:0007186-&&-G-protein coupled receptor signaling pathway-%%-GO:0070098-&&-chemokine-mediated signaling pathway","cellular_component-&-1&-GO:0005886-&&-plasma membrane-%%-GO:0005887-&&-integral component of plasma membrane-%%-GO:0005769-&&-early endosome-%%-GO:005…	["KEGG-&-1&-hsa04060-&&-Cytokine-cytokine receptor interaction"]	ACKR4	Homo sapiens (Human)-&&-9606	taxon:9606	["Gene Symbol-&-1&-ACKR4"]	[""]	FALSE	5	5
ZNF496	ZNF496	G:9606:ZNF496	166630	1902	zinc finger protein 496	gene	["biological_process-&-1&-GO:0000122-&&-negative regulation of transcription from RNA polymerase II promoter-%%-GO:0006351-&&-transcription, DNA-templated-%%-GO:0045893-&&-positive regulation of transcription, DNA-templated","cellular_component-&-1&-GO:0005634-&&-nucleus-%%-GO:0016604-&&-nuclear body","molecular_function-&-1&-GO:0005515-&&-protein binding-%%-GO:0000981-&&-RNA polymerase II transc…	[""]	ZNF496	Homo sapiens (Human)-&&-9606	taxon:9606	["Gene Symbol-&-1&-ZNF496"]	[""]	FALSE	8	8
CCT2	CCT2	G:9606:CCT2	174823	1902	chaperonin containing TCP1 subunit 2	gene	["biological_process-&-1&-GO:0006457-&&-protein folding-%%-GO:0051131-&&-chaperone-mediated protein complex assembly-%%-GO:0007339-&&-binding of sperm to zona pellucida-%%-GO:0050821-&&-protein stabilization-%%-GO:0032212-&&-positive regulation of telomere maintenance via telomerase-%%-GO:0043312-&&-neutrophil degranulation-%%-GO:0051086-&&-chaperone mediated protein folding independent of cofact…	[""]	CCT2	Homo sapiens (Human)-&&-9606	taxon:9606	["Gene Symbol-&-1&-CCT2"]	[""]	FALSE	59	59
PLG	PLG	G:9606:PLG	178922	1902	plasminogen	gene	["biological_process-&-1&-GO:0002576-&&-platelet degranulation-%%-GO:0007596-&&-blood coagulation-%%-GO:0006508-&&-proteolysis-%%-GO:0008285-&&-negative regulation of cell proliferation-%%-GO:0010812-&&-negative regulation of cell-substrate adhesion-%%-GO:0022617-&&-extracellular matrix disassembly-%%-GO:0042730-&&-fibrinolysis-%%-GO:0044267-&&-cellular protein metabolic process-%%-GO:0048771-&&-…	["KEGG-&-1&-hsa05150-&&-Staphylococcus aureus infection-%%-hsa04610-&&-Complement and coagulation cascades-%%-hsa04080-&&-Neuroactive ligand-receptor interaction-%%-hsa05164-&&-Influenza A"]	PLG	Homo sapiens (Human)-&&-9606	taxon:9606	["Gene Symbol-&-1&-PLG"]	[""]	FALSE	37	37
PLEC	PLEC	G:9606:PLEC	178923	1902	plectin	gene	["biological_process-&-1&-GO:0031581-&&-hemidesmosome assembly","cellular_component-&-1&-GO:0005886-&&-plasma membrane-%%-GO:0005829-&&-cytosol-%%-GO:0005903-&&-brush border-%%-GO:0005925-&&-focal adhesion-%%-GO:0016528-&&-sarcoplasm-%%-GO:0030056-&&-hemidesmosome-%%-GO:0031012-&&-extracellular matrix-%%-GO:0042383-&&-sarcolemma-%%-GO:0043034-&&-costamere-%%-GO:0045111-&&-intermediate filament cy…	[""]	PLEC	Homo sapiens (Human)-&&-9606	taxon:9606	["Gene Symbol-&-1&-PLEC"]	[""]	FALSE	38	38
VTA1	VTA1	G:9606:VTA1	170731	1902	vesicle trafficking 1	gene	["biological_process-&-1&-GO:0015031-&&-protein transport-%%-GO:0016197-&&-endosomal transport-%%-GO:0016236-&&-macroautophagy-%%-GO:0019058-&&-viral life cycle-%%-GO:0036258-&&-multivesicular body assembly-%%-GO:0046755-&&-viral budding-%%-GO:0071985-&&-multivesicular body sorting pathway-%%-GO:1904903-&&-ESCRT III complex disassembly","cellular_component-&-1&-GO:0005829-&&-cytosol-%%-GO:0005654…	["KEGG-&-1&-hsa04144-&&-Endocytosis"]	VTA1	Homo sapiens (Human)-&&-9606	taxon:9606	["Gene Symbol-&-1&-VTA1"]	[""]	FALSE	9	9
CCT4	CCT4	G:9606:CCT4	174824	1902	chaperonin containing TCP1 subunit 4	gene	["biological_process-&-1&-GO:0006457-&&-protein folding-%%-GO:0006458-&&-'de novo' protein folding-%%-GO:0007339-&&-binding of sperm to zona pellucida-%%-GO:0050821-&&-protein stabilization-%%-GO:0032212-&&-positive regulation of telomere maintenance via telomerase-%%-GO:0051973-&&-positive regulation of telomerase activity-%%-GO:0061077-&&-chaperone-mediated protein folding-%%-GO:0090666-&&-scaR…	[""]	CCT4	Homo sapiens (Human)-&&-9606	taxon:9606	["Gene Symbol-&-1&-CCT4"]	[""]	FALSE	52	52
CCT7	CCT7	G:9606:CCT7	174825	1902	chaperonin containing TCP1 subunit 7	gene	["biological_process-&-1&-GO:0006457-&&-protein folding-%%-GO:0006458-&&-'de novo' protein folding-%%-GO:0007339-&&-binding of sperm to zona pellucida-%%-GO:0050821-&&-protein stabilization-%%-GO:0032212-&&-positive regulation of telomere maintenance via telomerase-%%-GO:0061077-&&-chaperone-mediated protein folding-%%-GO:1901998-&&-toxin transport-%%-GO:1904851-&&-positive regulation of establis…	[""]	CCT7	Homo sapiens (Human)-&&-9606	taxon:9606	["Gene Symbol-&-1&-CCT7"]	[""]	FALSE	52	52
PLCG1	PLCG1	G:9606:PLCG1	178927	1902	phospholipase C gamma 1	gene	["biological_process-&-1&-GO:0000186-&&-activation of MAPKK activity-%%-GO:0001701-&&-in utero embryonic development-%%-GO:0007165-&&-signal transduction-%%-GO:0007173-&&-epidermal growth factor receptor signaling pathway-%%-GO:0019722-&&-calcium-mediated signaling-%%-GO:0007411-&&-axon guidance-%%-GO:0009395-&&-phospholipid catabolic process-%%-GO:0016032-&&-viral process-%%-GO:0010634-&&-positi…	["KEGG-&-1&-hsa04072-&&-Phospholipase D signaling pathway-%%-hsa01521-&&-EGFR tyrosine kinase inhibitor resistance-%%-hsa04933-&&-AGE-RAGE signaling pathway in diabetic complications-%%-hsa04020-&&-Calcium signaling pathway-%%-hsa04012-&&-ErbB signaling pathway-%%-hsa04722-&&-Neurotrophin signaling pathway-%%-hsa05110-&&-Vibrio cholerae infection-%%-hsa04066-&&-HIF-1 signaling pathway-%%-hsa04370…	PLCG1	Homo sapiens (Human)-&&-9606	taxon:9606	["Gene Symbol-&-1&-PLCG1"]	[""]	FALSE	52	52
PLD2	PLD2	G:9606:PLD2	178924	1902	phospholipase D2	gene	["biological_process-&-1&-GO:0007010-&&-cytoskeleton organization-%%-GO:0006654-&&-phosphatidic acid biosynthetic process-%%-GO:0007264-&&-small GTPase mediated signal transduction-%%-GO:0016042-&&-lipid catabolic process-%%-GO:0048017-&&-inositol lipid-mediated signaling-%%-GO:0036465-&&-synaptic vesicle recycling-%%-GO:0038096-&&-Fc-gamma receptor signaling pathway involved in phagocytosis-%%-G…	["KEGG-&-1&-hsa04071-&&-Sphingolipid signaling pathway-%%-hsa04072-&&-Phospholipase D signaling pathway-%%-hsa04144-&&-Endocytosis-%%-hsa00565-&&-Ether lipid metabolism-%%-hsa04724-&&-Glutamatergic synapse-%%-hsa00564-&&-Glycerophospholipid metabolism-%%-hsa04014-&&-Ras signaling pathway-%%-hsa04912-&&-GnRH signaling pathway-%%-hsa04024-&&-cAMP signaling pathway-%%-hsa04666-&&-Fc gamma R-mediated…	PLD2	Homo sapiens (Human)-&&-9606	taxon:9606	["Gene Symbol-&-1&-PLD2"]	[""]	FALSE	22	22
PLD1	PLD1	G:9606:PLD1	178925	1902	phospholipase D1	gene	["biological_process-&-1&-GO:0006654-&&-phosphatidic acid biosynthetic process-%%-GO:0006935-&&-chemotaxis-%%-GO:0007264-&&-small GTPase mediated signal transduction-%%-GO:0007265-&&-Ras protein signal transduction-%%-GO:0016042-&&-lipid catabolic process-%%-GO:0048017-&&-inositol lipid-mediated signaling-%%-GO:0032534-&&-regulation of microvillus assembly-%%-GO:0043312-&&-neutrophil degranulatio…	["KEGG-&-1&-hsa04071-&&-Sphingolipid signaling pathway-%%-hsa04072-&&-Phospholipase D signaling pathway-%%-hsa00565-&&-Ether lipid metabolism-%%-hsa04144-&&-Endocytosis-%%-hsa05212-&&-Pancreatic cancer-%%-hsa04724-&&-Glutamatergic synapse-%%-hsa00564-&&-Glycerophospholipid metabolism-%%-hsa05200-&&-Pathways in cancer-%%-hsa04014-&&-Ras signaling pathway-%%-hsa04912-&&-GnRH signaling pathway-%%-hs…	PLD1	Homo sapiens (Human)-&&-9606	taxon:9606	["Gene Symbol-&-1&-PLD1"]	[""]	FALSE	14	14
BAG6	BAG6	G:9606:BAG6	176882	1902	BCL2 associated athanogene 6	gene	["biological_process-&-1&-GO:0001822-&&-kidney development-%%-GO:0002429-&&-immune response-activating cell surface receptor signaling pathway-%%-GO:0006915-&&-apoptotic process-%%-GO:0006511-&&-ubiquitin-dependent protein catabolic process-%%-GO:0006810-&&-transport-%%-GO:0007130-&&-synaptonemal complex assembly-%%-GO:0007283-&&-spermatogenesis-%%-GO:0009790-&&-embryo development-%%-GO:0007420-&…	[""]	BAG6	Homo sapiens (Human)-&&-9606	taxon:9606	["Gene Symbol-&-1&-BAG6"]	[""]	FALSE	59	59
JKAMP	JKAMP	G:9606:JKAMP	170736	1902	JNK1/MAPK8-associated membrane protein	gene	["biological_process-&-1&-GO:0006986-&&-response to unfolded protein-%%-GO:0030433-&&-ER-associated ubiquitin-dependent protein catabolic process","cellular_component-&-1&-GO:0016021-&&-integral component of membrane-%%-GO:0005789-&&-endoplasmic reticulum membrane","molecular_function-&-1&-GO:0031625-&&-ubiquitin protein ligase binding"]	[""]	JKAMP	Homo sapiens (Human)-&&-9606	taxon:9606	["Gene Symbol-&-1&-JKAMP"]	[""]	FALSE	4	4
DDX39B	DDX39B	G:9606:DDX39B	176880	1902	DExD-box helicase 39B	gene	["biological_process-&-1&-GO:0000245-&&-spliceosomal complex assembly-%%-GO:0000398-&&-mRNA splicing, via spliceosome-%%-GO:0001889-&&-liver development-%%-GO:0006369-&&-termination of RNA polymerase II transcription-%%-GO:0006405-&&-RNA export from nucleus-%%-GO:0006406-&&-mRNA export from nucleus-%%-GO:0032786-&&-positive regulation of DNA-templated transcription, elongation-%%-GO:0008380-&&-RN…	["KEGG-&-1&-hsa03013-&&-RNA transport-%%-hsa03015-&&-mRNA surveillance pathway-%%-hsa03040-&&-Spliceosome-%%-hsa05164-&&-Influenza A"]	DDX39B	Homo sapiens (Human)-&&-9606	taxon:9606	["Gene Symbol-&-1&-DDX39B"]	[""]	FALSE	19	19
LARS	LARS	G:9606:LARS	170742	1902	leucyl-tRNA synthetase	gene	["biological_process-&-1&-GO:0006418-&&-tRNA aminoacylation for protein translation-%%-GO:0006429-&&-leucyl-tRNA aminoacylation-%%-GO:0006438-&&-valyl-tRNA aminoacylation-%%-GO:0006450-&&-regulation of translational fidelity","cellular_component-&-1&-GO:0005829-&&-cytosol-%%-GO:0016604-&&-nuclear body","molecular_function-&-1&-GO:0005515-&&-protein binding-%%-GO:0002161-&&-aminoacyl-tRNA editing …	["KEGG-&-1&-hsa00970-&&-Aminoacyl-tRNA biosynthesis"]	LARS	Homo sapiens (Human)-&&-9606	taxon:9606	["Gene Symbol-&-1&-LARS"]	[""]	FALSE	25	25
PLAU	PLAU	G:9606:PLAU	178934	1902	plasminogen activator, urokinase	gene	["biological_process-&-1&-GO:0001666-&&-response to hypoxia-%%-GO:0007596-&&-blood coagulation-%%-GO:0007165-&&-signal transduction-%%-GO:0006508-&&-proteolysis-%%-GO:0006935-&&-chemotaxis-%%-GO:0010469-&&-regulation of receptor activity-%%-GO:0014909-&&-smooth muscle cell migration-%%-GO:0014910-&&-regulation of smooth muscle cell migration-%%-GO:0030335-&&-positive regulation of cell migration-…	["KEGG-&-1&-hsa04064-&&-NF-kappa B signaling pathway-%%-hsa05206-&&-MicroRNAs in cancer-%%-hsa04610-&&-Complement and coagulation cascades-%%-hsa05215-&&-Prostate cancer-%%-hsa05202-&&-Transcriptional misregulation in cancer-%%-hsa05205-&&-Proteoglycans in cancer"]	PLAU	Homo sapiens (Human)-&&-9606	taxon:9606	["Gene Symbol-&-1&-PLAU"]	[""]	FALSE	8	8
PLAT	PLAT	G:9606:PLAT	178935	1902	plasminogen activator, tissue type	gene	["biological_process-&-1&-GO:0001666-&&-response to hypoxia-%%-GO:0007596-&&-blood coagulation-%%-GO:0006464-&&-cellular protein modification process-%%-GO:0006508-&&-proteolysis-%%-GO:0014909-&&-smooth muscle cell migration-%%-GO:0031639-&&-plasminogen activation-%%-GO:0042730-&&-fibrinolysis-%%-GO:0045861-&&-negative regulation of proteolysis-%%-GO:0048008-&&-platelet-derived growth factor rece…	["KEGG-&-1&-hsa04610-&&-Complement and coagulation cascades-%%-hsa05418-&&-Fluid shear stress and atherosclerosis-%%-hsa05215-&&-Prostate cancer-%%-hsa05202-&&-Transcriptional misregulation in cancer-%%-hsa04371-&&-Apelin signaling pathway"]	PLAT	Homo sapiens (Human)-&&-9606	taxon:9606	["Gene Symbol-&-1&-PLAT"]	["PLAT"]	TRUE	32	32
ANP32B	ANP32B	G:9606:ANP32B	174846	1902	acidic nuclear phosphoprotein 32 family member B	gene	["biological_process-&-1&-GO:0001944-&&-vasculature development-%%-GO:0006334-&&-nucleosome assembly-%%-GO:0006919-&&-activation of cysteine-type endopeptidase activity involved in apoptotic process-%%-GO:0021591-&&-ventricular system development-%%-GO:0045596-&&-negative regulation of cell differentiation-%%-GO:0046827-&&-positive regulation of protein export from nucleus-%%-GO:0048839-&&-inner …	[""]	ANP32B	Homo sapiens (Human)-&&-9606	taxon:9606	["Gene Symbol-&-1&-ANP32B"]	[""]	FALSE	48	48
PROCR	PROCR	G:9606:PROCR	174844	1902	protein C receptor	gene	["biological_process-&-1&-GO:0007596-&&-blood coagulation-%%-GO:0050819-&&-negative regulation of coagulation-%%-GO:0050900-&&-leukocyte migration","cellular_component-&-1&-GO:0005886-&&-plasma membrane-%%-GO:0005576-&&-extracellular region-%%-GO:0005887-&&-integral component of plasma membrane-%%-GO:0005813-&&-centrosome-%%-GO:0005925-&&-focal adhesion-%%-GO:0009986-&&-cell surface-%%-GO:0070062…	["KEGG-&-1&-hsa04610-&&-Complement and coagulation cascades"]	PROCR	Homo sapiens (Human)-&&-9606	taxon:9606	["Gene Symbol-&-1&-PROCR"]	[""]	FALSE	3	3
GLRX3	GLRX3	G:9606:GLRX3	174848	1902	glutaredoxin 3	gene	["biological_process-&-1&-GO:0002026-&&-regulation of the force of heart contraction-%%-GO:0055114-&&-oxidation-reduction process-%%-GO:0045454-&&-cell redox homeostasis-%%-GO:0010614-&&-negative regulation of cardiac muscle hypertrophy-%%-GO:0044571-&&-[2Fe-2S] cluster assembly-%%-GO:0097428-&&-protein maturation by iron-sulfur cluster transfer","cellular_component-&-1&-GO:0005634-&&-nucleus-%%-…	[""]	GLRX3	Homo sapiens (Human)-&&-9606	taxon:9606	["Gene Symbol-&-1&-GLRX3"]	[""]	FALSE	12	12
RAB7A	RAB7A	G:9606:RAB7A	176902	1902	RAB7A, member RAS oncogene family	gene	["biological_process-&-1&-GO:0006622-&&-protein targeting to lysosome-%%-GO:0006897-&&-endocytosis-%%-GO:0007174-&&-epidermal growth factor catabolic process-%%-GO:0007264-&&-small GTPase mediated signal transduction-%%-GO:0008333-&&-endosome to lysosome transport-%%-GO:0015031-&&-protein transport-%%-GO:0019076-&&-viral release from host cell-%%-GO:0019886-&&-antigen processing and presentation …	["KEGG-&-1&-hsa04137-&&-Mitophagy - animal-%%-hsa05132-&&-Salmonella infection-%%-hsa04144-&&-Endocytosis-%%-hsa05146-&&-Amoebiasis-%%-hsa04145-&&-Phagosome-%%-hsa04140-&&-Autophagy - animal-%%-hsa05152-&&-Tuberculosis"]	RAB7A	Homo sapiens (Human)-&&-9606	taxon:9606	["Gene Symbol-&-1&-RAB7A"]	[""]	FALSE	63	20.4831	63
USP7	USP7	G:9606:USP7	176903	1902	ubiquitin specific peptidase 7	gene	["biological_process-&-1&-GO:0016567-&&-protein ubiquitination-%%-GO:0006283-&&-transcription-coupled nucleotide-excision repair-%%-GO:0006511-&&-ubiquitin-dependent protein catabolic process-%%-GO:0007275-&&-multicellular organism development-%%-GO:0016032-&&-viral process-%%-GO:0010216-&&-maintenance of DNA methylation-%%-GO:0016579-&&-protein deubiquitination-%%-GO:0050821-&&-protein stabiliza…	["KEGG-&-1&-hsa04068-&&-FoxO signaling pathway-%%-hsa05168-&&-Herpes simplex infection-%%-hsa05169-&&-Epstein-Barr virus infection-%%-hsa05203-&&-Viral carcinogenesis"]	USP7	Homo sapiens (Human)-&&-9606	taxon:9606	["Gene Symbol-&-1&-USP7"]	[""]	FALSE	66	58.8549	66
LIMA1	LIMA1	G:9606:LIMA1	170766	1902	LIM domain and actin binding 1	gene	["biological_process-&-1&-GO:0051017-&&-actin filament bundle assembly-%%-GO:0030835-&&-negative regulation of actin filament depolymerization-%%-GO:0031529-&&-ruffle organization","cellular_component-&-1&-GO:0001725-&&-stress fiber-%%-GO:0005737-&&-cytoplasm-%%-GO:0005903-&&-brush border-%%-GO:0005925-&&-focal adhesion-%%-GO:0015629-&&-actin cytoskeleton-%%-GO:0032154-&&-cleavage furrow","molecu…	[""]	LIMA1	Homo sapiens (Human)-&&-9606	taxon:9606	["Gene Symbol-&-1&-LIMA1"]	[""]	FALSE	79	68.8219	79
[truncated: 811 more rows]
