# Supplementary material for: Integrating Network Pharmacology and Pharmacological Validation for Deciphering the Mechanism of Qishen Yixin Granules in Suppressing myocardial fibrosis
Source: Research Square preprint supplement (doi:10.21203/rs.3.rs-1526523/v1), 2022-04-08
Supplement: Supplementary file 2 [file 48895b8c799bb66ef5fcb707.xlsx]

## Sheet: Targets of each herb contained 
Mol ID	Molecule name	Target name	Source
MOL000358	beta-sitosterol	Progesterone receptor	DrugBank
MOL000358	beta-sitosterol	Nuclear receptor coactivator 2	DrugBank
MOL000358	beta-sitosterol	Prostaglandin G/H synthase 1	DrugBank
MOL000358	beta-sitosterol	Prostaglandin G/H synthase 2	DrugBank
MOL000358	beta-sitosterol	Heat shock protein HSP 90	DrugBank
MOL000358	beta-sitosterol	Phosphatidylinositol-4,5-bisphosphate 3-kinase catalytic subunit, gamma isoform	DrugBank
MOL000358	beta-sitosterol	Potassium voltage-gated channel subfamily H member 2	DrugBank
MOL000358	beta-sitosterol	mRNA of PKA Catalytic Subunit C-alpha	DrugBank
MOL000358	beta-sitosterol	Dopamine D1 receptor	DrugBank
MOL000358	beta-sitosterol	Muscarinic acetylcholine receptor M3	DrugBank
MOL000358	beta-sitosterol	Muscarinic acetylcholine receptor M1	DrugBank
MOL000358	beta-sitosterol	Sodium channel protein type 5 subunit alpha	DrugBank
MOL000358	beta-sitosterol	Gamma-aminobutyric-acid receptor alpha-2 subunit	DrugBank
MOL000358	beta-sitosterol	Muscarinic acetylcholine receptor M4	DrugBank
MOL000358	beta-sitosterol	CGMP-inhibited 3',5'-cyclic phosphodiesterase A	DrugBank
MOL000358	beta-sitosterol	5-hydroxytryptamine 2A receptor	DrugBank
MOL000358	beta-sitosterol	Gamma-aminobutyric-acid receptor alpha-5 subunit	DrugBank
MOL000358	beta-sitosterol	Alpha-1A adrenergic receptor	DrugBank
MOL000358	beta-sitosterol	Gamma-aminobutyric-acid receptor alpha-3 subunit	DrugBank
MOL000358	beta-sitosterol	Muscarinic acetylcholine receptor M2	DrugBank
MOL000358	beta-sitosterol	Alpha-1B adrenergic receptor	DrugBank
MOL000358	beta-sitosterol	Beta-2 adrenergic receptor	DrugBank
MOL000358	beta-sitosterol	Neuronal acetylcholine receptor subunit alpha-2	DrugBank
MOL000358	beta-sitosterol	Sodium-dependent serotonin transporter	DrugBank
MOL000358	beta-sitosterol	Mu-type opioid receptor	DrugBank
MOL000358	beta-sitosterol	Gamma-aminobutyric acid receptor subunit alpha-1	DrugBank
MOL000358	beta-sitosterol	Neuronal acetylcholine receptor protein, alpha-7 chain	DrugBank
MOL000358	beta-sitosterol	Cytochrome P450-cam	DrugBank
MOL000358	beta-sitosterol	Apoptosis regulator Bcl-2	DrugBank
MOL000358	beta-sitosterol	Apoptosis regulator BAX	N/A
MOL000358	beta-sitosterol	Caspase-9	N/A
MOL000358	beta-sitosterol	Transcription factor AP-1	DrugBank
MOL000358	beta-sitosterol	Caspase-3	N/A
MOL000358	beta-sitosterol	Caspase-8	N/A
MOL000358	beta-sitosterol	Protein kinase C alpha type	N/A
MOL000358	beta-sitosterol	Transforming growth factor beta-1	N/A
MOL000358	beta-sitosterol	Serum paraoxonase/arylesterase 1	DrugBank
MOL000358	beta-sitosterol	Microtubule-associated protein 2	DrugBank
MOL000449	Stigmasterol	Progesterone receptor	DrugBank
MOL000449	Stigmasterol	Mineralocorticoid receptor	DrugBank
MOL000449	Stigmasterol	Nuclear receptor coactivator 2	DrugBank
MOL000449	Stigmasterol	Alcohol dehydrogenase 1C	DrugBank
MOL000449	Stigmasterol	Ig gamma-1 chain C region	DrugBank
MOL000449	Stigmasterol	Retinoic acid receptor RXR-alpha	DrugBank
MOL000449	Stigmasterol	Nuclear receptor coactivator 1	DrugBank
MOL000449	Stigmasterol	Prostaglandin G/H synthase 1	DrugBank
MOL000449	Stigmasterol	Prostaglandin G/H synthase 2	DrugBank
MOL000449	Stigmasterol	Alpha-2A adrenergic receptor	DrugBank
MOL000449	Stigmasterol	Sodium-dependent noradrenaline transporter	DrugBank
MOL000449	Stigmasterol	Sodium-dependent dopamine transporter	DrugBank
MOL000449	Stigmasterol	Beta-2 adrenergic receptor	DrugBank
MOL000449	Stigmasterol	Aldose reductase	DrugBank
MOL000449	Stigmasterol	Urokinase-type plasminogen activator	DrugBank
MOL000449	Stigmasterol	Leukotriene A-4 hydrolase	DrugBank
MOL000449	Stigmasterol	Amine oxidase [flavin-containing] B	DrugBank
MOL000449	Stigmasterol	Amine oxidase [flavin-containing] A	DrugBank
MOL000449	Stigmasterol	mRNA of PKA Catalytic Subunit C-alpha	DrugBank
MOL000449	Stigmasterol	Chymotrypsinogen B	DrugBank
MOL000449	Stigmasterol	Muscarinic acetylcholine receptor M3	DrugBank
MOL000449	Stigmasterol	Muscarinic acetylcholine receptor M1	DrugBank
MOL000449	Stigmasterol	Beta-1 adrenergic receptor	DrugBank
MOL000449	Stigmasterol	Sodium channel protein type 5 subunit alpha	DrugBank
MOL000449	Stigmasterol	5-hydroxytryptamine 2A receptor	DrugBank
MOL000449	Stigmasterol	Alpha-1A adrenergic receptor	DrugBank
MOL000449	Stigmasterol	Gamma-aminobutyric-acid receptor alpha-3 subunit	DrugBank
MOL000449	Stigmasterol	Muscarinic acetylcholine receptor M2	DrugBank
MOL000449	Stigmasterol	Alpha-1B adrenergic receptor	DrugBank
MOL000449	Stigmasterol	Gamma-aminobutyric acid receptor subunit alpha-1	DrugBank
MOL000449	Stigmasterol	Neuronal acetylcholine receptor protein, alpha-7 chain	DrugBank
MOL000114	vanillic acid	Prostaglandin G/H synthase 2	DrugBank
MOL000114	vanillic acid	Amine oxidase [flavin-containing] B	DrugBank
MOL000114	vanillic acid	Amine oxidase [flavin-containing] A	DrugBank
MOL000114	vanillic acid	Alpha-2A adrenergic receptor	DrugBank
MOL000114	vanillic acid	Prostaglandin G/H synthase 1	DrugBank
MOL000114	vanillic acid	Lysozyme	DrugBank
MOL000114	vanillic acid	Nitric oxide synthase, endothelial	N/A
MOL000114	vanillic acid	5,6-dihydroxyindole-2-carboxylic acid oxidase	N/A
MOL000131	EIC	Prostaglandin G/H synthase 1	DrugBank
MOL000131	EIC	Prostaglandin G/H synthase 2	DrugBank
MOL000131	EIC	Retinoic acid receptor RXR-alpha	DrugBank
MOL000131	EIC	Nuclear receptor coactivator 2	DrugBank
MOL000131	EIC	Lysozyme	DrugBank
MOL000131	EIC	Nicotinate-nucleotide--dimethylbenzimidazole phosphoribosyltransferase	DrugBank
MOL000131	EIC	Sodium-dependent noradrenaline transporter	DrugBank
MOL000131	EIC	Ig gamma-1 chain C region	DrugBank
MOL000131	EIC	Gamma-aminobutyric-acid receptor alpha-2 subunit	DrugBank
MOL000131	EIC	Gamma-aminobutyric acid receptor subunit alpha-1	DrugBank
MOL000131	EIC	Cytochrome P450-cam	DrugBank
MOL000131	EIC	Transient receptor potential cation channel subfamily V member 1	DrugBank
MOL000131	EIC	Muscarinic acetylcholine receptor M1	DrugBank
MOL000131	EIC	Muscarinic acetylcholine receptor M2	DrugBank
MOL000131	EIC	Gamma-aminobutyric-acid receptor subunit alpha-6	DrugBank
MOL000211	Mairin	Progesterone receptor	DrugBank
MOL000239	Jaranol	Nitric oxide synthase, inducible	DrugBank
MOL000239	Jaranol	Prostaglandin G/H synthase 1	DrugBank
MOL000239	Jaranol	Androgen receptor	DrugBank
MOL000239	Jaranol	Sodium channel protein type 5 subunit alpha	DrugBank
MOL000239	Jaranol	Prostaglandin G/H synthase 2	DrugBank
MOL000239	Jaranol	Estrogen receptor beta	DrugBank
MOL000239	Jaranol	Dipeptidyl peptidase IV	DrugBank
MOL000239	Jaranol	Heat shock protein HSP 90	DrugBank
MOL000239	Jaranol	Cell division protein kinase 2	DrugBank
MOL000239	Jaranol	Serine/threonine-protein kinase Chk1	DrugBank
MOL000239	Jaranol	Trypsin-1	DrugBank
MOL000239	Jaranol	Nuclear receptor coactivator 2	DrugBank
MOL000239	Jaranol	Calmodulin	DrugBank
MOL000251	Rhamnocitrin	Nitric oxide synthase, inducible	DrugBank
MOL000251	Rhamnocitrin	Prostaglandin G/H synthase 1	DrugBank
MOL000251	Rhamnocitrin	Estrogen receptor	DrugBank
MOL000251	Rhamnocitrin	Androgen receptor	DrugBank
MOL000251	Rhamnocitrin	Peroxisome proliferator activated receptor gamma	DrugBank
MOL000251	Rhamnocitrin	Prostaglandin G/H synthase 2	DrugBank
MOL000251	Rhamnocitrin	Estrogen receptor beta	DrugBank
MOL000251	Rhamnocitrin	Dipeptidyl peptidase IV	DrugBank
MOL000251	Rhamnocitrin	Mitogen-activated protein kinase 14	DrugBank
MOL000251	Rhamnocitrin	Glycogen synthase kinase-3 beta	DrugBank
MOL000251	Rhamnocitrin	Heat shock protein HSP 90	DrugBank
MOL000251	Rhamnocitrin	Cell division protein kinase 2	DrugBank
MOL000251	Rhamnocitrin	Phosphatidylinositol-4,5-bisphosphate 3-kinase catalytic subunit, gamma isoform	DrugBank
MOL000251	Rhamnocitrin	Serine/threonine-protein kinase Chk1	DrugBank
MOL000251	Rhamnocitrin	mRNA of PKA Catalytic Subunit C-alpha	DrugBank
MOL000251	Rhamnocitrin	Trypsin-1	DrugBank
MOL000251	Rhamnocitrin	Calmodulin	DrugBank
MOL000251	Rhamnocitrin	Nuclear receptor coactivator 2	DrugBank
MOL000251	Rhamnocitrin	Aldose reductase	DrugBank
MOL000295	alexandrin	Prostaglandin G/H synthase 2	DrugBank
MOL000295	alexandrin	Progesterone receptor	DrugBank
MOL000295	alexandrin	Mineralocorticoid receptor	DrugBank
MOL000295	alexandrin	Nuclear receptor coactivator 2	DrugBank
MOL000295	alexandrin	Nuclear receptor coactivator 1	DrugBank
MOL000295	alexandrin	Alcohol dehydrogenase 1C	DrugBank
MOL000295	alexandrin	Lysozyme	DrugBank
MOL000295	alexandrin	Nicotinate-nucleotide--dimethylbenzimidazole phosphoribosyltransferase	DrugBank
MOL000295	alexandrin	Trypsin-3	DrugBank
MOL000295	alexandrin	DNA topoisomerase II	DrugBank
MOL000295	alexandrin	Prostaglandin G/H synthase 1	DrugBank
MOL000295	alexandrin	Glycogen phosphorylase, muscle form	DrugBank
MOL000295	alexandrin	Heat shock protein HSP 90	DrugBank
MOL000295	alexandrin	Phosphatidylinositol-4,5-bisphosphate 3-kinase catalytic subunit, gamma isoform	DrugBank
MOL000296	hederagenin	Progesterone receptor	DrugBank
MOL000296	hederagenin	Nuclear receptor coactivator 2	DrugBank
MOL000296	hederagenin	Muscarinic acetylcholine receptor M3	DrugBank
MOL000296	hederagenin	Muscarinic acetylcholine receptor M1	DrugBank
MOL000296	hederagenin	Gamma-aminobutyric-acid receptor alpha-2 subunit	DrugBank
MOL000296	hederagenin	Gamma-aminobutyric-acid receptor alpha-3 subunit	DrugBank
MOL000296	hederagenin	Muscarinic acetylcholine receptor M2	DrugBank
MOL000296	hederagenin	Alpha-1B adrenergic receptor	DrugBank
MOL000296	hederagenin	Gamma-aminobutyric acid receptor subunit alpha-1	DrugBank
MOL000296	hederagenin	Glutamate receptor 2	DrugBank
MOL000296	hederagenin	Gamma-aminobutyric-acid receptor subunit alpha-6	DrugBank
MOL000296	hederagenin	Gamma-aminobutyric-acid receptor alpha-5 subunit	DrugBank
MOL000296	hederagenin	Ig gamma-1 chain C region	DrugBank
MOL000296	hederagenin	Alcohol dehydrogenase 1B	DrugBank
MOL000296	hederagenin	Alcohol dehydrogenase 1C	DrugBank
MOL000296	hederagenin	Lysozyme	DrugBank
MOL000296	hederagenin	Nicotinate-nucleotide--dimethylbenzimidazole phosphoribosyltransferase	DrugBank
MOL000296	hederagenin	Prostaglandin G/H synthase 1	DrugBank
MOL000296	hederagenin	Sodium channel protein type 5 subunit alpha	DrugBank
MOL000296	hederagenin	Prostaglandin G/H synthase 2	DrugBank
MOL000296	hederagenin	Retinoic acid receptor RXR-alpha	DrugBank
MOL000296	hederagenin	CGMP-inhibited 3',5'-cyclic phosphodiesterase A	DrugBank
MOL000296	hederagenin	Sodium-dependent noradrenaline transporter	DrugBank
MOL000296	hederagenin	Cytochrome P450-cam	DrugBank
MOL000033	(3S,8S,9S,10R,13R,14S,17R)-10,13-dimethyl-17-[(2R,5S)-5-propan-2-yloctan-2-yl]-2,3,4,7,8,9,11,12,14,15,16,17-dodecahydro-1H-cyclopenta[a]phenanthren-3-ol	Progesterone receptor	DrugBank
MOL000354	isorhamnetin	Nitric oxide synthase, inducible	DrugBank
MOL000354	isorhamnetin	Prostaglandin G/H synthase 1	DrugBank
MOL000354	isorhamnetin	Estrogen receptor	DrugBank
MOL000354	isorhamnetin	Androgen receptor	DrugBank
MOL000354	isorhamnetin	Peroxisome proliferator activated receptor gamma	DrugBank
MOL000354	isorhamnetin	Prostaglandin G/H synthase 2	DrugBank
MOL000354	isorhamnetin	mRNA of Protein-tyrosine phosphatase, non-receptor type 1	DrugBank
MOL000354	isorhamnetin	Estrogen receptor beta	DrugBank
MOL000354	isorhamnetin	Dipeptidyl peptidase IV	DrugBank
MOL000354	isorhamnetin	Mitogen-activated protein kinase 14	DrugBank
MOL000354	isorhamnetin	Glycogen synthase kinase-3 beta	DrugBank
MOL000354	isorhamnetin	Heat shock protein HSP 90	DrugBank
MOL000354	isorhamnetin	Cell division protein kinase 2	DrugBank
MOL000354	isorhamnetin	Phosphatidylinositol-4,5-bisphosphate 3-kinase catalytic subunit, gamma isoform	DrugBank
MOL000354	isorhamnetin	mRNA of PKA Catalytic Subunit C-alpha	DrugBank
MOL000354	isorhamnetin	Trypsin-1	DrugBank
MOL000354	isorhamnetin	Proto-oncogene serine/threonine-protein kinase Pim-1	DrugBank
MOL000354	isorhamnetin	Cyclin-A2	DrugBank
MOL000354	isorhamnetin	Nuclear receptor coactivator 2	DrugBank
MOL000354	isorhamnetin	Calmodulin	DrugBank
MOL000354	isorhamnetin	Glycogen phosphorylase, muscle form	DrugBank
MOL000354	isorhamnetin	Peroxisome proliferator activated receptor delta	DrugBank
MOL000354	isorhamnetin	Serine/threonine-protein kinase Chk1	DrugBank
MOL000354	isorhamnetin	Aldose reductase	DrugBank
MOL000354	isorhamnetin	Nuclear receptor coactivator 1	DrugBank
MOL000354	isorhamnetin	Coagulation factor VII	DrugBank
MOL000354	isorhamnetin	Thrombin	DrugBank
MOL000354	isorhamnetin	Nitric-oxide synthase, endothelial	DrugBank
MOL000354	isorhamnetin	Acetylcholinesterase	DrugBank
MOL000354	isorhamnetin	Gamma-aminobutyric acid receptor subunit alpha-1	DrugBank
MOL000354	isorhamnetin	Amine oxidase [flavin-containing] B	DrugBank
MOL000354	isorhamnetin	Glutamate receptor 2	DrugBank
MOL000354	isorhamnetin	Cytochrome P450-cam	DrugBank
MOL000354	isorhamnetin	Transcription factor p65	N/A
MOL000354	isorhamnetin	Xanthine dehydrogenase/oxidase	DrugBank
MOL000354	isorhamnetin	Neutrophil cytosol factor 1	N/A
MOL000354	isorhamnetin	Oxidized low-density lipoprotein receptor 1	N/A
MOL000356	lupeol	Progesterone receptor	DrugBank
MOL000356	lupeol	Apoptosis regulator Bcl-2	DrugBank
MOL000356	lupeol	Apoptosis regulator BAX	N/A
MOL000356	lupeol	Caspase-9	N/A
MOL000356	lupeol	Caspase-3	N/A
MOL000356	lupeol	Superoxide dismutase [Cu-Zn]	DrugBank
MOL000356	lupeol	Cell division control protein 2 homolog	DrugBank
MOL000356	lupeol	G2/mitotic-specific cyclin-B1	N/A
MOL000356	lupeol	M-phase inducer phosphatase 3	N/A
MOL000356	lupeol	Apoptotic protease-activating factor 1	DrugBank
MOL000356	lupeol	Serine/threonine-protein kinase PLK1	DrugBank
MOL000356	lupeol	14-3-3 protein sigma	N/A
MOL000356	lupeol	Carnitine O-acetyltransferase	DrugBank
MOL000371	3,9-di-O-methylnissolin	Nitric oxide synthase, inducible	DrugBank
MOL000371	3,9-di-O-methylnissolin	Prostaglandin G/H synthase 1	DrugBank
MOL000371	3,9-di-O-methylnissolin	Muscarinic acetylcholine receptor M3	DrugBank
MOL000371	3,9-di-O-methylnissolin	Thrombin	DrugBank
MOL000371	3,9-di-O-methylnissolin	Muscarinic acetylcholine receptor M1	DrugBank
MOL000371	3,9-di-O-methylnissolin	Estrogen receptor	DrugBank
MOL000371	3,9-di-O-methylnissolin	Beta-1 adrenergic receptor	DrugBank
MOL000371	3,9-di-O-methylnissolin	Sodium channel protein type 5 subunit alpha	DrugBank
MOL000371	3,9-di-O-methylnissolin	Prostaglandin G/H synthase 2	DrugBank
MOL000371	3,9-di-O-methylnissolin	Nitric-oxide synthase, endothelial	DrugBank
MOL000371	3,9-di-O-methylnissolin	5-hydroxytryptamine receptor 3A	DrugBank
MOL000371	3,9-di-O-methylnissolin	Alpha-2C adrenergic receptor	DrugBank
MOL000371	3,9-di-O-methylnissolin	Retinoic acid receptor RXR-alpha	DrugBank
MOL000371	3,9-di-O-methylnissolin	Acetylcholinesterase	DrugBank
MOL000371	3,9-di-O-methylnissolin	CGMP-inhibited 3',5'-cyclic phosphodiesterase A	DrugBank
MOL000371	3,9-di-O-methylnissolin	Alpha-1B adrenergic receptor	DrugBank
MOL000371	3,9-di-O-methylnissolin	Beta-2 adrenergic receptor	DrugBank
MOL000371	3,9-di-O-methylnissolin	Alpha-1D adrenergic receptor	DrugBank
MOL000371	3,9-di-O-methylnissolin	Mu-type opioid receptor	DrugBank
MOL000371	3,9-di-O-methylnissolin	Gamma-aminobutyric acid receptor subunit alpha-1	DrugBank
MOL000371	3,9-di-O-methylnissolin	Trypsin-1	DrugBank
MOL000371	3,9-di-O-methylnissolin	Nuclear receptor coactivator 2	DrugBank
MOL000371	3,9-di-O-methylnissolin	Calmodulin	DrugBank
MOL000372	3-Hydroxy-2-picoline	Alcohol dehydrogenase 1B	DrugBank
MOL000372	3-Hydroxy-2-picoline	Alcohol dehydrogenase 1C	DrugBank
MOL000372	3-Hydroxy-2-picoline	Alcohol dehydrogenase 1A	DrugBank
MOL000372	3-Hydroxy-2-picoline	Lysozyme	DrugBank
MOL000372	3-Hydroxy-2-picoline	Nicotinate-nucleotide--dimethylbenzimidazole phosphoribosyltransferase	DrugBank
MOL000373	(2S)-4-methoxy-7-methyl-2-[1-methyl-1-[(2S,3R,4S,5S,6R)-3,4,5-trihydroxy-6-methylol-tetrahydropyran-2-yl]oxy-ethyl]-2,3-dihydrofuro[3,2-g]chromen-5-one	Androgen receptor	DrugBank
MOL000373	(2S)-4-methoxy-7-methyl-2-[1-methyl-1-[(2S,3R,4S,5S,6R)-3,4,5-trihydroxy-6-methylol-tetrahydropyran-2-yl]oxy-ethyl]-2,3-dihydrofuro[3,2-g]chromen-5-one	Coagulation factor Xa	DrugBank
MOL000373	(2S)-4-methoxy-7-methyl-2-[1-methyl-1-[(2S,3R,4S,5S,6R)-3,4,5-trihydroxy-6-methylol-tetrahydropyran-2-yl]oxy-ethyl]-2,3-dihydrofuro[3,2-g]chromen-5-one	DNA topoisomerase II	DrugBank
MOL000373	(2S)-4-methoxy-7-methyl-2-[1-methyl-1-[(2S,3R,4S,5S,6R)-3,4,5-trihydroxy-6-methylol-tetrahydropyran-2-yl]oxy-ethyl]-2,3-dihydrofuro[3,2-g]chromen-5-one	Nuclear receptor coactivator 2	DrugBank
MOL000375	5'-hydroxyiso-muronulatol-2',5'-di-O-glucoside_qt	DNA topoisomerase II	DrugBank
MOL000376	7,2'-dihydroxy-3',4'-dimethoxyisoflavone-7-O-尾-D-glucoside	DNA topoisomerase II	DrugBank
MOL000376	7,2'-dihydroxy-3',4'-dimethoxyisoflavone-7-O-尾-D-glucoside	Nuclear receptor coactivator 2	DrugBank
MOL000378	7-O-methylisomucronulatol	Nitric oxide synthase, inducible	DrugBank
MOL000378	7-O-methylisomucronulatol	Prostaglandin G/H synthase 1	DrugBank
MOL000378	7-O-methylisomucronulatol	Dopamine D1 receptor	DrugBank
MOL000378	7-O-methylisomucronulatol	Muscarinic acetylcholine receptor M3	DrugBank
MOL000378	7-O-methylisomucronulatol	Thrombin	DrugBank
MOL000378	7-O-methylisomucronulatol	Potassium voltage-gated channel subfamily H member 2	DrugBank
MOL000378	7-O-methylisomucronulatol	Muscarinic acetylcholine receptor M1	DrugBank
MOL000378	7-O-methylisomucronulatol	Estrogen receptor	DrugBank
MOL000378	7-O-methylisomucronulatol	Androgen receptor	DrugBank
MOL000378	7-O-methylisomucronulatol	Beta-1 adrenergic receptor	DrugBank
MOL000378	7-O-methylisomucronulatol	Sodium channel protein type 5 subunit alpha	DrugBank
MOL000378	7-O-methylisomucronulatol	Peroxisome proliferator activated receptor gamma	DrugBank
MOL000378	7-O-methylisomucronulatol	Coagulation factor Xa	DrugBank
MOL000378	7-O-methylisomucronulatol	Muscarinic acetylcholine receptor M5	DrugBank
MOL000378	7-O-methylisomucronulatol	Prostaglandin G/H synthase 2	DrugBank
MOL000378	7-O-methylisomucronulatol	Nitric-oxide synthase, endothelial	DrugBank
MOL000378	7-O-methylisomucronulatol	Alpha-2C adrenergic receptor	DrugBank
MOL000378	7-O-methylisomucronulatol	Muscarinic acetylcholine receptor M4	DrugBank
MOL000378	7-O-methylisomucronulatol	Retinoic acid receptor RXR-alpha	DrugBank
MOL000378	7-O-methylisomucronulatol	Delta-type opioid receptor	DrugBank
MOL000378	7-O-methylisomucronulatol	CGMP-inhibited 3',5'-cyclic phosphodiesterase A	DrugBank
MOL000378	7-O-methylisomucronulatol	5-hydroxytryptamine 2A receptor	DrugBank
MOL000378	7-O-methylisomucronulatol	Alpha-1A adrenergic receptor	DrugBank
MOL000378	7-O-methylisomucronulatol	Muscarinic acetylcholine receptor M2	DrugBank
MOL000378	7-O-methylisomucronulatol	Alpha-1B adrenergic receptor	DrugBank
MOL000378	7-O-methylisomucronulatol	Sodium-dependent dopamine transporter	DrugBank
MOL000378	7-O-methylisomucronulatol	Beta-2 adrenergic receptor	DrugBank
MOL000378	7-O-methylisomucronulatol	Alpha-1D adrenergic receptor	DrugBank
MOL000378	7-O-methylisomucronulatol	Sodium-dependent serotonin transporter	DrugBank
MOL000378	7-O-methylisomucronulatol	Estrogen receptor beta	DrugBank
MOL000379	9,10-dimethoxypterocarpan-3-O-尾-D-glucoside	Prostaglandin G/H synthase 2	DrugBank
MOL000379	9,10-dimethoxypterocarpan-3-O-尾-D-glucoside	DNA topoisomerase II	DrugBank
MOL000379	9,10-dimethoxypterocarpan-3-O-尾-D-glucoside	Nuclear receptor coactivator 2	DrugBank
MOL000380	(6aR,11aR)-9,10-dimethoxy-6a,11a-dihydro-6H-benzofurano[3,2-c]chromen-3-ol	Nitric oxide synthase, inducible	DrugBank
MOL000380	(6aR,11aR)-9,10-dimethoxy-6a,11a-dihydro-6H-benzofurano[3,2-c]chromen-3-ol	Prostaglandin G/H synthase 1	DrugBank
MOL000380	(6aR,11aR)-9,10-dimethoxy-6a,11a-dihydro-6H-benzofurano[3,2-c]chromen-3-ol	Muscarinic acetylcholine receptor M3	DrugBank
MOL000380	(6aR,11aR)-9,10-dimethoxy-6a,11a-dihydro-6H-benzofurano[3,2-c]chromen-3-ol	Thrombin	DrugBank
MOL000380	(6aR,11aR)-9,10-dimethoxy-6a,11a-dihydro-6H-benzofurano[3,2-c]chromen-3-ol	Muscarinic acetylcholine receptor M1	DrugBank
MOL000380	(6aR,11aR)-9,10-dimethoxy-6a,11a-dihydro-6H-benzofurano[3,2-c]chromen-3-ol	Estrogen receptor	DrugBank
MOL000380	(6aR,11aR)-9,10-dimethoxy-6a,11a-dihydro-6H-benzofurano[3,2-c]chromen-3-ol	Sodium channel protein type 5 subunit alpha	DrugBank
MOL000380	(6aR,11aR)-9,10-dimethoxy-6a,11a-dihydro-6H-benzofurano[3,2-c]chromen-3-ol	Prostaglandin G/H synthase 2	DrugBank
MOL000380	(6aR,11aR)-9,10-dimethoxy-6a,11a-dihydro-6H-benzofurano[3,2-c]chromen-3-ol	5-hydroxytryptamine receptor 3A	DrugBank
MOL000380	(6aR,11aR)-9,10-dimethoxy-6a,11a-dihydro-6H-benzofurano[3,2-c]chromen-3-ol	Retinoic acid receptor RXR-alpha	DrugBank
MOL000380	(6aR,11aR)-9,10-dimethoxy-6a,11a-dihydro-6H-benzofurano[3,2-c]chromen-3-ol	Acetylcholinesterase	DrugBank
MOL000380	(6aR,11aR)-9,10-dimethoxy-6a,11a-dihydro-6H-benzofurano[3,2-c]chromen-3-ol	Alpha-1B adrenergic receptor	DrugBank
MOL000380	(6aR,11aR)-9,10-dimethoxy-6a,11a-dihydro-6H-benzofurano[3,2-c]chromen-3-ol	Beta-2 adrenergic receptor	DrugBank
MOL000380	(6aR,11aR)-9,10-dimethoxy-6a,11a-dihydro-6H-benzofurano[3,2-c]chromen-3-ol	Alpha-1D adrenergic receptor	DrugBank
MOL000380	(6aR,11aR)-9,10-dimethoxy-6a,11a-dihydro-6H-benzofurano[3,2-c]chromen-3-ol	Gamma-aminobutyric acid receptor subunit alpha-1	DrugBank
MOL000380	(6aR,11aR)-9,10-dimethoxy-6a,11a-dihydro-6H-benzofurano[3,2-c]chromen-3-ol	Heat shock protein HSP 90	DrugBank
MOL000380	(6aR,11aR)-9,10-dimethoxy-6a,11a-dihydro-6H-benzofurano[3,2-c]chromen-3-ol	Neuronal acetylcholine receptor protein, alpha-7 chain	DrugBank
MOL000380	(6aR,11aR)-9,10-dimethoxy-6a,11a-dihydro-6H-benzofurano[3,2-c]chromen-3-ol	Trypsin-1	DrugBank
MOL000380	(6aR,11aR)-9,10-dimethoxy-6a,11a-dihydro-6H-benzofurano[3,2-c]chromen-3-ol	Nuclear receptor coactivator 2	DrugBank
MOL000380	(6aR,11aR)-9,10-dimethoxy-6a,11a-dihydro-6H-benzofurano[3,2-c]chromen-3-ol	Nuclear receptor coactivator 1	DrugBank
MOL000380	(6aR,11aR)-9,10-dimethoxy-6a,11a-dihydro-6H-benzofurano[3,2-c]chromen-3-ol	Calmodulin	DrugBank
MOL000380	(6aR,11aR)-9,10-dimethoxy-6a,11a-dihydro-6H-benzofurano[3,2-c]chromen-3-ol	Muscarinic acetylcholine receptor M4	DrugBank
MOL000381	13-hydroxy-9,11-octadecadienoic acid	Prostaglandin G/H synthase 1	DrugBank
MOL000381	13-hydroxy-9,11-octadecadienoic acid	Prostaglandin G/H synthase 2	DrugBank
MOL000381	13-hydroxy-9,11-octadecadienoic acid	Nuclear receptor coactivator 2	DrugBank
MOL000382	Arabinose,d	Ferrichrome-iron receptor	DrugBank
MOL000382	Arabinose,d	Bacillolysin	DrugBank
MOL005928	isoferulic acid	Prostaglandin G/H synthase 1	DrugBank
MOL005928	isoferulic acid	Beta-1 adrenergic receptor	DrugBank
MOL005928	isoferulic acid	Prostaglandin G/H synthase 2	DrugBank
MOL005928	isoferulic acid	Nitric-oxide synthase, endothelial	DrugBank
MOL005928	isoferulic acid	Alpha-2A adrenergic receptor	DrugBank
MOL005928	isoferulic acid	Alpha-2C adrenergic receptor	DrugBank
MOL005928	isoferulic acid	Sodium-dependent dopamine transporter	DrugBank
MOL005928	isoferulic acid	Beta-2 adrenergic receptor	DrugBank
MOL005928	isoferulic acid	Leukotriene A-4 hydrolase	DrugBank
MOL005928	isoferulic acid	Amine oxidase [flavin-containing] B	DrugBank
MOL005928	isoferulic acid	Amine oxidase [flavin-containing] A	DrugBank
MOL005928	isoferulic acid	Alpha-1A adrenergic receptor	DrugBank
MOL000386	Fucopyranose, L-	Ferrichrome-iron receptor	DrugBank
MOL000386	Fucopyranose, L-	Bacillolysin	DrugBank
MOL000387	Bifendate	Prostaglandin G/H synthase 2	DrugBank
MOL000387	Bifendate	Vascular endothelial growth factor receptor 2	DrugBank
MOL000387	Bifendate	Hepatocyte growth factor receptor	DrugBank
MOL000387	Bifendate	Heat shock protein HSP 90	DrugBank
MOL000387	Bifendate	Calcium-activated potassium channel subunit alpha 1	DrugBank
MOL000387	Bifendate	Prostaglandin G/H synthase 1	DrugBank
MOL000387	Bifendate	DNA topoisomerase II	DrugBank
MOL000388	gamma-aminobutyric acid	Cathepsin D	DrugBank
MOL000388	gamma-aminobutyric acid	Cholinesterase	DrugBank
MOL000388	gamma-aminobutyric acid	Alcohol dehydrogenase 1B	DrugBank
MOL000388	gamma-aminobutyric acid	Alcohol dehydrogenase 1C	DrugBank
MOL000388	gamma-aminobutyric acid	Cytochrome P450-cam	DrugBank
MOL000388	gamma-aminobutyric acid	Aspartate aminotransferase	DrugBank
MOL000388	gamma-aminobutyric acid	Ferrichrome-iron receptor	DrugBank
MOL000388	gamma-aminobutyric acid	Bacillolysin	DrugBank
MOL000388	gamma-aminobutyric acid	2-hydroxy-6-oxo-7-methylocta-2,4-dienoate hydrolase	DrugBank
MOL000388	gamma-aminobutyric acid	1-aminocyclopropane-1-carboxylate deaminase	DrugBank
MOL000388	gamma-aminobutyric acid	Glycine amidinotransferase, mitochondrial	DrugBank
MOL000388	gamma-aminobutyric acid	Trypsin-3	DrugBank
MOL000388	gamma-aminobutyric acid	4-aminobutyrate aminotransferase, mitochondrial	DrugBank
MOL000388	gamma-aminobutyric acid	mRNA of PKA Catalytic Subunit C-alpha	DrugBank
MOL000388	gamma-aminobutyric acid	Alcohol dehydrogenase 1A	DrugBank
MOL000388	gamma-aminobutyric acid	Haloalkane dehalogenase	DrugBank
MOL000388	gamma-aminobutyric acid	Interleukin-6	DrugBank
MOL000388	gamma-aminobutyric acid	Transitional endoplasmic reticulum ATPase	N/A
MOL000388	gamma-aminobutyric acid	Sodium- and chloride-dependent GABA transporter 1	DrugBank
MOL000389	FERULIC ACID (CIS)	Prostaglandin G/H synthase 1	DrugBank
MOL000389	FERULIC ACID (CIS)	Prostaglandin G/H synthase 2	DrugBank
MOL000389	FERULIC ACID (CIS)	Nitric-oxide synthase, endothelial	DrugBank
MOL000389	FERULIC ACID (CIS)	Alpha-2A adrenergic receptor	DrugBank
MOL000389	FERULIC ACID (CIS)	Sodium-dependent noradrenaline transporter	DrugBank
MOL000389	FERULIC ACID (CIS)	Alpha-2B adrenergic receptor	DrugBank
MOL000389	FERULIC ACID (CIS)	Sodium-dependent dopamine transporter	DrugBank
MOL000389	FERULIC ACID (CIS)	Beta-2 adrenergic receptor	DrugBank
MOL000389	FERULIC ACID (CIS)	Leukotriene A-4 hydrolase	DrugBank
MOL000389	FERULIC ACID (CIS)	Amine oxidase [flavin-containing] B	DrugBank
MOL000389	FERULIC ACID (CIS)	Amine oxidase [flavin-containing] A	DrugBank
MOL000389	FERULIC ACID (CIS)	mRNA of PKA Catalytic Subunit C-alpha	DrugBank
MOL000389	FERULIC ACID (CIS)	Chymotrypsinogen B	DrugBank
MOL000389	FERULIC ACID (CIS)	Muscarinic acetylcholine receptor M2	DrugBank
MOL000390	daidzein	Prostaglandin G/H synthase 1	DrugBank
MOL000390	daidzein	Estrogen receptor	DrugBank
MOL000390	daidzein	Peroxisome proliferator activated receptor gamma	DrugBank
MOL000390	daidzein	Prostaglandin G/H synthase 2	DrugBank
MOL000390	daidzein	Retinoic acid receptor RXR-alpha	DrugBank
MOL000390	daidzein	Beta-2 adrenergic receptor	DrugBank
MOL000390	daidzein	Mitogen-activated protein kinase 14	DrugBank
MOL000390	daidzein	Heat shock protein HSP 90	DrugBank
MOL000390	daidzein	Cell division protein kinase 2	DrugBank
MOL000390	daidzein	Serine/threonine-protein kinase Chk1	DrugBank
MOL000390	daidzein	mRNA of PKA Catalytic Subunit C-alpha	DrugBank
MOL000390	daidzein	Trypsin-1	DrugBank
MOL000390	daidzein	CGMP-inhibited 3',5'-cyclic phosphodiesterase A	DrugBank
MOL000390	daidzein	Transcription factor p65	N/A
MOL000390	daidzein	Vascular endothelial growth factor A	DrugBank
MOL000390	daidzein	Proto-oncogene c-Fos	N/A
MOL000390	daidzein	Cyclin-dependent kinase inhibitor 1	N/A
MOL000390	daidzein	Eukaryotic translation initiation factor 6	N/A
MOL000390	daidzein	Apoptosis regulator BAX	N/A
MOL000390	daidzein	Tumor necrosis factor	DrugBank
MOL000390	daidzein	Transcription factor AP-1	DrugBank
MOL000390	daidzein	Interleukin-6	DrugBank
MOL000390	daidzein	Nitric oxide synthase, inducible	DrugBank
MOL000390	daidzein	Caspase-3	N/A
MOL000390	daidzein	Cellular tumor antigen p53	DrugBank
MOL000390	daidzein	Low-density lipoprotein receptor	DrugBank
MOL000390	daidzein	Catalase	DrugBank
MOL000390	daidzein	Insulin-like growth factor 1 receptor	N/A
MOL000390	daidzein	Signal transducer and activator of transcription 1-alpha/beta	N/A
MOL000390	daidzein	Peroxisome proliferator-activated receptor gamma	N/A
MOL000390	daidzein	Cytochrome P450 3A4	DrugBank
MOL000390	daidzein	Caveolin-1	N/A
MOL000390	daidzein	Intercellular adhesion molecule 1	N/A
MOL000390	daidzein	Microsomal triglyceride transfer protein large subunit	N/A
MOL000390	daidzein	Apolipoprotein B-100	N/A
MOL000390	daidzein	Vascular cell adhesion protein 1	DrugBank
MOL000390	daidzein	Superoxide dismutase [Mn], mitochondrial	N/A
MOL000390	daidzein	Nitric oxide synthase, endothelial	N/A
MOL000390	daidzein	Endothelin-converting enzyme 1	DrugBank
MOL000390	daidzein	Gamma-aminobutyric acid type B receptor subunit 1	N/A
MOL000390	daidzein	Interleukin-4	N/A
MOL000390	daidzein	Carnitine O-palmitoyltransferase 1, liver isoform	N/A
MOL000390	daidzein	Calmodulin	DrugBank
MOL000390	daidzein	Aryl hydrocarbon receptor	DrugBank
MOL000390	daidzein	Transforming protein RhoA	N/A
MOL000390	daidzein	Metallothionein-2	N/A
MOL000390	daidzein	Low affinity immunoglobulin epsilon Fc receptor	N/A
MOL000390	daidzein	Antigen KI-67	N/A
MOL000390	daidzein	Histone acetyltransferase p300	N/A
MOL000390	daidzein	ATP synthase subunit beta, mitochondrial	DrugBank
MOL000390	daidzein	NADH-ubiquinone oxidoreductase chain 6	DrugBank
MOL000390	daidzein	3 beta-hydroxysteroid dehydrogenase/Delta 5-->4-isomerase type 2	N/A
MOL000390	daidzein	3 beta-hydroxysteroid dehydrogenase/Delta 5-->4-isomerase type 1	N/A
MOL000390	daidzein	Trefoil factor 1	N/A
MOL000390	daidzein	Transient receptor potential cation channel subfamily M member 2	N/A
MOL000390	daidzein	Somatotropin	N/A
MOL000390	daidzein	Insulin-like growth factor IA	N/A
MOL000390	daidzein	Peroxisome proliferator-activated receptor gamma coactivator 1-beta	N/A
MOL000390	daidzein	Beta-1,4-galactosyltransferase 4	DrugBank
MOL000390	daidzein	Growth hormone receptor	DrugBank
MOL000390	daidzein	Transforming growth factor beta-1-induced transcript 1 protein	N/A
MOL000390	daidzein	CD5 antigen-like	N/A
MOL000390	daidzein	Protein disulfide-isomerase	DrugBank
MOL000390	daidzein	Leucyl-tRNA synthetase, cytoplasmic	DrugBank
MOL000390	daidzein	Steroid 21-hydroxylase	N/A
MOL000390	daidzein	Growth arrest and DNA damage-inducible protein GADD45 alpha	N/A
MOL000390	daidzein	BRCA1-associated RING domain protein 1	N/A
MOL000390	daidzein	RNA-binding protein 45	N/A
MOL000390	daidzein	Ubiquitin carboxyl-terminal hydrolase BAP1	N/A
MOL000390	daidzein	DNA repair protein RAD51 homolog 1	DrugBank
MOL000391	Ononin	Nitric oxide synthase, inducible	DrugBank
MOL000391	Ononin	Thrombin	DrugBank
MOL000391	Ononin	Estrogen receptor	DrugBank
MOL000391	Ononin	Androgen receptor	DrugBank
MOL000391	Ononin	Prostaglandin G/H synthase 2	DrugBank
MOL000391	Ononin	Coagulation factor VII	DrugBank
MOL000391	Ononin	Vascular endothelial growth factor receptor 2	DrugBank
MOL000391	Ononin	Dipeptidyl peptidase IV	DrugBank
MOL000391	Ononin	Calmodulin	DrugBank
MOL000391	Ononin	Peroxisome proliferator activated receptor gamma	DrugBank
MOL000392	formononetin	Nitric oxide synthase, inducible	DrugBank
MOL000392	formononetin	Prostaglandin G/H synthase 1	DrugBank
MOL000392	formononetin	Muscarinic acetylcholine receptor M1	DrugBank
MOL000392	formononetin	Estrogen receptor	DrugBank
MOL000392	formononetin	Androgen receptor	DrugBank
MOL000392	formononetin	Peroxisome proliferator activated receptor gamma	DrugBank
MOL000392	formononetin	Prostaglandin G/H synthase 2	DrugBank
MOL000392	formononetin	Retinoic acid receptor RXR-alpha	DrugBank
MOL000392	formononetin	CGMP-inhibited 3',5'-cyclic phosphodiesterase A	DrugBank
MOL000392	formononetin	Alpha-1A adrenergic receptor	DrugBank
MOL000392	formononetin	Sodium-dependent dopamine transporter	DrugBank
MOL000392	formononetin	Beta-2 adrenergic receptor	DrugBank
MOL000392	formononetin	Sodium-dependent serotonin transporter	DrugBank
MOL000392	formononetin	Estrogen receptor beta	DrugBank
MOL000392	formononetin	Dipeptidyl peptidase IV	DrugBank
MOL000392	formononetin	Mitogen-activated protein kinase 14	DrugBank
MOL000392	formononetin	Glycogen synthase kinase-3 beta	DrugBank
MOL000392	formononetin	Heat shock protein HSP 90	DrugBank
MOL000392	formononetin	Cell division protein kinase 2	DrugBank
MOL000392	formononetin	Amine oxidase [flavin-containing] B	DrugBank
MOL000392	formononetin	Serine/threonine-protein kinase Chk1	DrugBank
MOL000392	formononetin	mRNA of PKA Catalytic Subunit C-alpha	DrugBank
MOL000392	formononetin	Trypsin-1	DrugBank
MOL000392	formononetin	Proto-oncogene serine/threonine-protein kinase Pim-1	DrugBank
MOL000392	formononetin	Cyclin-A2	DrugBank
MOL000392	formononetin	Calmodulin	DrugBank
MOL000392	formononetin	cAMP-dependent protein kinase inhibitor alpha	DrugBank
MOL000392	formononetin	Thrombin	DrugBank
MOL000392	formononetin	Nitric-oxide synthase, endothelial	DrugBank
MOL000392	formononetin	Acetylcholinesterase	DrugBank
MOL000392	formononetin	Beta-lactamase	DrugBank
MOL000392	formononetin	Transcription factor AP-1	DrugBank
MOL000392	formononetin	Peroxisome proliferator-activated receptor gamma	N/A
MOL000392	formononetin	Interleukin-4	N/A
MOL000392	formononetin	NAD-dependent deacetylase sirtuin-1	N/A
MOL000392	formononetin	ATP synthase subunit beta, mitochondrial	DrugBank
MOL000392	formononetin	NADH-ubiquinone oxidoreductase chain 6	DrugBank
MOL000392	formononetin	3 beta-hydroxysteroid dehydrogenase/Delta 5-->4-isomerase type 2	N/A
MOL000392	formononetin	3 beta-hydroxysteroid dehydrogenase/Delta 5-->4-isomerase type 1	N/A
MOL000396	(+)-Syringaresinol	Potassium voltage-gated channel subfamily H member 2	DrugBank
MOL000396	(+)-Syringaresinol	Sodium channel protein type 5 subunit alpha	DrugBank
MOL000396	(+)-Syringaresinol	Coagulation factor Xa	DrugBank
MOL000396	(+)-Syringaresinol	Prostaglandin G/H synthase 2	DrugBank
MOL000396	(+)-Syringaresinol	DNA topoisomerase II	DrugBank
MOL000396	(+)-Syringaresinol	Nuclear receptor coactivator 2	DrugBank
MOL000396	(+)-Syringaresinol	Calmodulin	DrugBank
MOL000396	(+)-Syringaresinol	Heat shock protein HSP 90	DrugBank
MOL000397	cis-p-Coumarate	Prostaglandin G/H synthase 1	DrugBank
MOL000397	cis-p-Coumarate	Prostaglandin G/H synthase 2	DrugBank
MOL000397	cis-p-Coumarate	Amine oxidase [flavin-containing] B	DrugBank
MOL000397	cis-p-Coumarate	Amine oxidase [flavin-containing] A	DrugBank
MOL000397	cis-p-Coumarate	Thermolysin	DrugBank
MOL000397	cis-p-Coumarate	Chymotrypsinogen B	DrugBank
MOL000397	cis-p-Coumarate	Muscarinic acetylcholine receptor M3	DrugBank
MOL000397	cis-p-Coumarate	Muscarinic acetylcholine receptor M1	DrugBank
MOL000397	cis-p-Coumarate	Gamma-aminobutyric-acid receptor alpha-2 subunit	DrugBank
MOL000397	cis-p-Coumarate	Gamma-aminobutyric-acid receptor alpha-3 subunit	DrugBank
MOL000397	cis-p-Coumarate	Muscarinic acetylcholine receptor M2	DrugBank
MOL000397	cis-p-Coumarate	Gamma-aminobutyric acid receptor subunit alpha-1	DrugBank
MOL000397	cis-p-Coumarate	Neuronal acetylcholine receptor protein, alpha-7 chain	DrugBank
MOL000397	cis-p-Coumarate	Gamma-aminobutyric-acid receptor subunit alpha-6	DrugBank
MOL000400	Flavaxin	Prostaglandin G/H synthase 2	DrugBank
MOL000411	Astraisoflavanin	Thrombin	DrugBank
MOL000411	Astraisoflavanin	Prostaglandin G/H synthase 2	DrugBank
MOL000411	Astraisoflavanin	DNA topoisomerase II	DrugBank
MOL000412	Mucronulatol	Nitric oxide synthase, inducible	DrugBank
MOL000412	Mucronulatol	Prostaglandin G/H synthase 1	DrugBank
MOL000412	Mucronulatol	Estrogen receptor	DrugBank
MOL000412	Mucronulatol	Androgen receptor	DrugBank
MOL000412	Mucronulatol	Sodium channel protein type 5 subunit alpha	DrugBank
MOL000412	Mucronulatol	Peroxisome proliferator activated receptor gamma	DrugBank
MOL000412	Mucronulatol	Prostaglandin G/H synthase 2	DrugBank
MOL000412	Mucronulatol	Retinoic acid receptor RXR-alpha	DrugBank
MOL000412	Mucronulatol	CGMP-inhibited 3',5'-cyclic phosphodiesterase A	DrugBank
MOL000412	Mucronulatol	Alpha-1B adrenergic receptor	DrugBank
MOL000412	Mucronulatol	Sodium-dependent dopamine transporter	DrugBank
MOL000412	Mucronulatol	Alpha-1D adrenergic receptor	DrugBank
MOL000412	Mucronulatol	Estrogen receptor beta	DrugBank
MOL000412	Mucronulatol	Dipeptidyl peptidase IV	DrugBank
MOL000412	Mucronulatol	Mitogen-activated protein kinase 14	DrugBank
MOL000412	Mucronulatol	Glycogen synthase kinase-3 beta	DrugBank
MOL000412	Mucronulatol	Heat shock protein HSP 90	DrugBank
MOL000412	Mucronulatol	Cell division protein kinase 2	DrugBank
MOL000412	Mucronulatol	Serine/threonine-protein kinase Chk1	DrugBank
MOL000412	Mucronulatol	Trypsin-1	DrugBank
MOL000412	Mucronulatol	Proto-oncogene serine/threonine-protein kinase Pim-1	DrugBank
MOL000412	Mucronulatol	Cyclin-A2	DrugBank
MOL000412	Mucronulatol	Nuclear receptor coactivator 2	DrugBank
MOL000412	Mucronulatol	Calmodulin	DrugBank
MOL000414	Caffeate	Prostaglandin G/H synthase 1	DrugBank
MOL000414	Caffeate	Beta-1 adrenergic receptor	DrugBank
MOL000414	Caffeate	Prostaglandin G/H synthase 2	DrugBank
MOL000414	Caffeate	Alpha-2A adrenergic receptor	DrugBank
MOL000414	Caffeate	Alpha-2C adrenergic receptor	DrugBank
MOL000414	Caffeate	Beta-2 adrenergic receptor	DrugBank
MOL000414	Caffeate	Amine oxidase [flavin-containing] B	DrugBank
MOL000414	Caffeate	Amine oxidase [flavin-containing] A	DrugBank
MOL000414	Caffeate	Chymotrypsinogen B	DrugBank
MOL000415	rutin	DNA topoisomerase II	DrugBank
MOL000415	rutin	Transcription factor p65	N/A
MOL000415	rutin	Tumor necrosis factor	DrugBank
MOL000415	rutin	Interleukin-6	DrugBank
MOL000415	rutin	Caspase-3	N/A
MOL000415	rutin	NADPH--cytochrome P450 reductase	DrugBank
MOL000415	rutin	Superoxide dismutase [Cu-Zn]	DrugBank
MOL000415	rutin	Catalase	DrugBank
MOL000415	rutin	Interleukin-1 beta	DrugBank
MOL000415	rutin	Interleukin-8	N/A
MOL000415	rutin	Protein kinase C beta type	N/A
MOL000415	rutin	Arachidonate 5-lipoxygenase	DrugBank
MOL000415	rutin	3-hydroxy-3-methylglutaryl-coenzyme A reductase	DrugBank
MOL000415	rutin	Hyaluronan synthase 2	N/A
MOL000415	rutin	Glutathione S-transferase P	DrugBank
MOL000415	rutin	Type I iodothyronine deiodinase	N/A
MOL000415	rutin	C5a anaphylatoxin chemotactic receptor	N/A
MOL000415	rutin	Insulin	DrugBank
MOL000415	rutin	Low affinity immunoglobulin epsilon Fc receptor	N/A
MOL000415	rutin	Integrin beta-2	DrugBank
MOL000415	rutin	Thromboxane A2 receptor	DrugBank
MOL000416	Lariciresinol	Sodium channel protein type 5 subunit alpha	DrugBank
MOL000416	Lariciresinol	Coagulation factor Xa	DrugBank
MOL000416	Lariciresinol	Prostaglandin G/H synthase 2	DrugBank
MOL000416	Lariciresinol	Beta-2 adrenergic receptor	DrugBank
MOL000416	Lariciresinol	Heat shock protein HSP 90	DrugBank
MOL000416	Lariciresinol	mRNA of PKA Catalytic Subunit C-alpha	DrugBank
MOL000416	Lariciresinol	Calmodulin	DrugBank
MOL000416	Lariciresinol	Potassium voltage-gated channel subfamily H member 2	DrugBank
MOL000416	Lariciresinol	Alpha-1B adrenergic receptor	DrugBank
MOL000417	Calycosin	Nitric oxide synthase, inducible	DrugBank
MOL000417	Calycosin	Prostaglandin G/H synthase 1	DrugBank
MOL000417	Calycosin	Estrogen receptor	DrugBank
MOL000417	Calycosin	Androgen receptor	DrugBank
MOL000417	Calycosin	Peroxisome proliferator activated receptor gamma	DrugBank
MOL000417	Calycosin	Prostaglandin G/H synthase 2	DrugBank
MOL000417	Calycosin	Retinoic acid receptor RXR-alpha	DrugBank
MOL000417	Calycosin	CGMP-inhibited 3',5'-cyclic phosphodiesterase A	DrugBank
MOL000417	Calycosin	Estrogen receptor beta	DrugBank
MOL000417	Calycosin	Dipeptidyl peptidase IV	DrugBank
MOL000417	Calycosin	Mitogen-activated protein kinase 14	DrugBank
MOL000417	Calycosin	Glycogen synthase kinase-3 beta	DrugBank
MOL000417	Calycosin	Heat shock protein HSP 90	DrugBank
MOL000417	Calycosin	Cell division protein kinase 2	DrugBank
MOL000417	Calycosin	Serine/threonine-protein kinase Chk1	DrugBank
MOL000417	Calycosin	mRNA of PKA Catalytic Subunit C-alpha	DrugBank
MOL000417	Calycosin	Trypsin-1	DrugBank
MOL000417	Calycosin	Proto-oncogene serine/threonine-protein kinase Pim-1	DrugBank
MOL000417	Calycosin	Cyclin-A2	DrugBank
MOL000417	Calycosin	Nuclear receptor coactivator 2	DrugBank
MOL000417	Calycosin	Calmodulin	DrugBank
MOL000417	Calycosin	Beta-2 adrenergic receptor	DrugBank
MOL000418	3'-Hydroxy-4'-methoxyisoflavone-7-O-beta-D-glucoside	Thrombin	DrugBank
MOL000418	3'-Hydroxy-4'-methoxyisoflavone-7-O-beta-D-glucoside	Prostaglandin G/H synthase 2	DrugBank
MOL000418	3'-Hydroxy-4'-methoxyisoflavone-7-O-beta-D-glucoside	Coagulation factor VII	DrugBank
MOL000420	XLS	Ferrichrome-iron receptor	DrugBank
MOL000420	XLS	Bacillolysin	DrugBank
MOL000421	nicotinic acid	Prostaglandin G/H synthase 1	DrugBank
MOL000421	nicotinic acid	Prostaglandin G/H synthase 2	DrugBank
MOL000421	nicotinic acid	Alcohol dehydrogenase 1B	DrugBank
MOL000421	nicotinic acid	Alcohol dehydrogenase 1C	DrugBank
MOL000421	nicotinic acid	Alcohol dehydrogenase 1A	DrugBank
MOL000421	nicotinic acid	Lysozyme	DrugBank
MOL000421	nicotinic acid	Nicotinate-nucleotide--dimethylbenzimidazole phosphoribosyltransferase	DrugBank
MOL000421	nicotinic acid	Trypsin-3	DrugBank
MOL000421	nicotinic acid	Apolipoprotein B-100	N/A
MOL000421	nicotinic acid	Lipoprotein lipase	DrugBank
MOL000421	nicotinic acid	Nitric oxide synthase, endothelial	N/A
MOL000421	nicotinic acid	Peroxisome proliferator-activated receptor alpha	N/A
MOL000421	nicotinic acid	ATP synthase subunit beta, mitochondrial	DrugBank
MOL000421	nicotinic acid	Haptoglobin	N/A
MOL000421	nicotinic acid	Pyruvate dehydrogenase protein X component, mitochondrial	N/A
MOL000421	nicotinic acid	2-acylglycerol O-acyltransferase 2	N/A
MOL000421	nicotinic acid	Peroxisome proliferator-activated receptor gamma coactivator 1-alpha	N/A
MOL000422	kaempferol	Nitric oxide synthase, inducible	DrugBank
MOL000422	kaempferol	Prostaglandin G/H synthase 1	DrugBank
MOL000422	kaempferol	Androgen receptor	DrugBank
MOL000422	kaempferol	Peroxisome proliferator activated receptor gamma	DrugBank
MOL000422	kaempferol	Prostaglandin G/H synthase 2	DrugBank
MOL000422	kaempferol	Heat shock protein HSP 90	DrugBank
MOL000422	kaempferol	Phosphatidylinositol-4,5-bisphosphate 3-kinase catalytic subunit, gamma isoform	DrugBank
MOL000422	kaempferol	mRNA of PKA Catalytic Subunit C-alpha	DrugBank
MOL000422	kaempferol	Nuclear receptor coactivator 2	DrugBank
MOL000422	kaempferol	Dipeptidyl peptidase IV	DrugBank
MOL000422	kaempferol	Trypsin-1	DrugBank
MOL000422	kaempferol	Progesterone receptor	DrugBank
MOL000422	kaempferol	Thrombin	DrugBank
MOL000422	kaempferol	Muscarinic acetylcholine receptor M1	DrugBank
MOL000422	kaempferol	Nitric-oxide synthase, endothelial	DrugBank
MOL000422	kaempferol	Gamma-aminobutyric-acid receptor alpha-2 subunit	DrugBank
MOL000422	kaempferol	Acetylcholinesterase	DrugBank
MOL000422	kaempferol	Sodium-dependent noradrenaline transporter	DrugBank
MOL000422	kaempferol	Muscarinic acetylcholine receptor M2	DrugBank
MOL000422	kaempferol	Alpha-1B adrenergic receptor	DrugBank
MOL000422	kaempferol	Gamma-aminobutyric acid receptor subunit alpha-1	DrugBank
MOL000422	kaempferol	DNA topoisomerase II	DrugBank
MOL000422	kaempferol	Coagulation factor VII	DrugBank
MOL000422	kaempferol	Calmodulin	DrugBank
MOL000422	kaempferol	Transcription factor p65	N/A
MOL000422	kaempferol	Inhibitor of nuclear factor kappa-B kinase subunit beta	N/A
MOL000422	kaempferol	RAC-alpha serine/threonine-protein kinase	N/A
MOL000422	kaempferol	Apoptosis regulator Bcl-2	DrugBank
MOL000422	kaempferol	Apoptosis regulator BAX	N/A
MOL000422	kaempferol	Tumor necrosis factor	DrugBank
MOL000422	kaempferol	Transcription factor AP-1	DrugBank
MOL000422	kaempferol	Activator of 90 kDa heat shock protein ATPase homolog 1	N/A
MOL000422	kaempferol	Caspase-3	N/A
MOL000422	kaempferol	Mitogen-activated protein kinase 8	DrugBank
MOL000422	kaempferol	Xanthine dehydrogenase/oxidase	DrugBank
MOL000422	kaempferol	Interstitial collagenase	DrugBank
MOL000422	kaempferol	Signal transducer and activator of transcription 1-alpha/beta	N/A
MOL000422	kaempferol	Cell division control protein 2 homolog	DrugBank
MOL000422	kaempferol	Peroxisome proliferator-activated receptor gamma	N/A
MOL000422	kaempferol	Heme oxygenase 1	DrugBank
MOL000422	kaempferol	Cytochrome P450 3A4	DrugBank
MOL000422	kaempferol	Cytochrome P450 1A2	DrugBank
MOL000422	kaempferol	Cytochrome P450 1A1	N/A
MOL000422	kaempferol	Intercellular adhesion molecule 1	N/A
MOL000422	kaempferol	E-selectin	DrugBank
MOL000422	kaempferol	Vascular cell adhesion protein 1	DrugBank
MOL000422	kaempferol	Nuclear receptor subfamily 1 group I member 2	N/A
MOL000422	kaempferol	Cytochrome P450 1B1	N/A
MOL000422	kaempferol	Arachidonate 5-lipoxygenase	DrugBank
MOL000422	kaempferol	Hyaluronan synthase 2	N/A
MOL000422	kaempferol	Glutathione S-transferase P	DrugBank
MOL000422	kaempferol	Aryl hydrocarbon receptor	DrugBank
MOL000422	kaempferol	26S proteasome non-ATPase regulatory subunit 3	N/A
MOL000422	kaempferol	Solute carrier family 2, facilitated glucose transporter member 4	N/A
MOL000422	kaempferol	Nuclear receptor subfamily 1 group I member 3	N/A
MOL000422	kaempferol	Insulin receptor	DrugBank
MOL000422	kaempferol	Type I iodothyronine deiodinase	N/A
MOL000422	kaempferol	Serine/threonine-protein phosphatase 2B catalytic subunit alpha isoform	DrugBank
MOL000422	kaempferol	Peroxidase C1A	N/A
MOL000422	kaempferol	Glutathione S-transferase Mu 1	DrugBank
MOL000422	kaempferol	Glutathione S-transferase Mu 2	DrugBank
MOL000422	kaempferol	Aldo-keto reductase family 1 member C3	DrugBank
MOL000422	kaempferol	Antileukoproteinase	N/A
MOL000423	rhamnocitrin-3-O-glucoside	Coagulation factor Xa	DrugBank
MOL000423	rhamnocitrin-3-O-glucoside	DNA topoisomerase II	DrugBank
MOL000424	RAM	Prostaglandin G/H synthase 1	DrugBank
MOL000424	RAM	Prostaglandin G/H synthase 2	DrugBank
MOL000424	RAM	Glutamate [NMDA] receptor subunit epsilon 1	DrugBank
MOL000424	RAM	Gamma-aminobutyric acid receptor subunit alpha-1	DrugBank
MOL000424	RAM	Cholinesterase	DrugBank
MOL000424	RAM	Cytochrome P450-cam	DrugBank
MOL000424	RAM	Ig gamma-1 chain C region	DrugBank
MOL000424	RAM	Neuraminidase	DrugBank
MOL000424	RAM	Ferrichrome-iron receptor	DrugBank
MOL000424	RAM	Cyclomaltodextrin glucanotransferase	DrugBank
MOL000424	RAM	Endoglucanase G	DrugBank
MOL000424	RAM	Bacillolysin	DrugBank
MOL000424	RAM	Gamma-aminobutyric-acid receptor subunit alpha-6	DrugBank
MOL000424	RAM	Glutamate receptor, ionotropic kainate 2	DrugBank
MOL000424	RAM	Alpha-mannosidase 2	DrugBank
MOL000424	RAM	Cathepsin D	DrugBank
MOL000429	Crystal VI	4-aminobutyrate aminotransferase, mitochondrial	DrugBank
MOL000429	Crystal VI	Aspartate aminotransferase, cytoplasmic	DrugBank
MOL000429	Crystal VI	mRNA of Protein-tyrosine phosphatase, non-receptor type 1	DrugBank
MOL000429	Crystal VI	Aldose reductase	DrugBank
MOL000429	Crystal VI	Gamma-aminobutyric acid receptor subunit alpha-1	DrugBank
MOL000429	Crystal VI	Cathepsin D	DrugBank
MOL000429	Crystal VI	Cholinesterase	DrugBank
MOL000429	Crystal VI	mRNA of PKA Catalytic Subunit C-alpha	DrugBank
MOL000429	Crystal VI	Alcohol dehydrogenase 1B	DrugBank
MOL000429	Crystal VI	Alcohol dehydrogenase 1C	DrugBank
MOL000429	Crystal VI	Aspartate aminotransferase	DrugBank
MOL000429	Crystal VI	Ferrichrome-iron receptor	DrugBank
MOL000429	Crystal VI	Bacillolysin	DrugBank
MOL000429	Crystal VI	Nicotinate-nucleotide--dimethylbenzimidazole phosphoribosyltransferase	DrugBank
MOL000429	Crystal VI	Growth-inhibiting protein 18	DrugBank
MOL000429	Crystal VI	Aspartate aminotransferase, mitochondrial	DrugBank
MOL000429	Crystal VI	Glycine amidinotransferase, mitochondrial	DrugBank
MOL000429	Crystal VI	Triosephosphate isomerase	DrugBank
MOL000429	Crystal VI	NAD-dependent malic enzyme, mitochondrial	DrugBank
MOL000429	Crystal VI	Nitric-oxide synthase, brain	DrugBank
MOL000429	Crystal VI	System N amino acid transporter 1	DrugBank
MOL000430	betaine	Prostaglandin G/H synthase 1	DrugBank
MOL000430	betaine	4-aminobutyrate aminotransferase, mitochondrial	DrugBank
MOL000430	betaine	Gamma-aminobutyric-acid receptor alpha-2 subunit	DrugBank
MOL000430	betaine	Glycine receptor alpha-1 chain	DrugBank
MOL000430	betaine	Gamma-aminobutyric-acid receptor alpha-3 subunit	DrugBank
MOL000430	betaine	Aspartate aminotransferase, cytoplasmic	DrugBank
MOL000430	betaine	mRNA of Protein-tyrosine phosphatase, non-receptor type 1	DrugBank
MOL000430	betaine	Aldose reductase	DrugBank
MOL000430	betaine	Gamma-aminobutyric acid receptor subunit alpha-1	DrugBank
MOL000430	betaine	Cathepsin D	DrugBank
MOL000430	betaine	Cholinesterase	DrugBank
MOL000430	betaine	Alcohol dehydrogenase 1B	DrugBank
MOL000430	betaine	Alcohol dehydrogenase 1C	DrugBank
MOL000430	betaine	Cytochrome P450-cam	DrugBank
MOL000430	betaine	Aspartate aminotransferase	DrugBank
MOL000430	betaine	Subtilisin BPN'	DrugBank
MOL000430	betaine	Ferrichrome-iron receptor	DrugBank
MOL000430	betaine	Glycine betaine-binding periplasmic protein precursor	DrugBank
MOL000430	betaine	Gag-Pol polyprotein	DrugBank
MOL000430	betaine	Bacillolysin	DrugBank
MOL000430	betaine	1-aminocyclopropane-1-carboxylate deaminase	DrugBank
MOL000430	betaine	Glycine amidinotransferase, mitochondrial	DrugBank
MOL000430	betaine	Triosephosphate isomerase	DrugBank
MOL000430	betaine	NAD-dependent malic enzyme, mitochondrial	DrugBank
MOL000430	betaine	Nitric-oxide synthase, brain	DrugBank
MOL000430	betaine	Prostaglandin G/H synthase 2	DrugBank
MOL000430	betaine	Glutamate receptor 1	DrugBank
MOL000430	betaine	M-phase inducer phosphatase 2	DrugBank
MOL000430	betaine	Amine oxidase [flavin-containing] B	DrugBank
MOL000430	betaine	D-alanyl-D-alanine carboxypeptidase	DrugBank
MOL000430	betaine	Haloalkane dehalogenase	DrugBank
MOL000430	betaine	Aspartate aminotransferase, mitochondrial	DrugBank
MOL000431	coumarin	Thrombin	DrugBank
MOL000431	coumarin	Prostaglandin G/H synthase 2	DrugBank
MOL000431	coumarin	Acetylcholinesterase	DrugBank
MOL000431	coumarin	Amine oxidase [flavin-containing] B	DrugBank
MOL000431	coumarin	Amine oxidase [flavin-containing] A	DrugBank
MOL000431	coumarin	Apoptosis regulator BAX	N/A
MOL000431	coumarin	Xanthine dehydrogenase/oxidase	DrugBank
MOL000431	coumarin	Cytochrome P450 3A4	DrugBank
MOL000431	coumarin	Gamma-glutamyltransferase 5	N/A
MOL000431	coumarin	Arachidonate 5-lipoxygenase	DrugBank
MOL000431	coumarin	Glutamate--cysteine ligase catalytic subunit	DrugBank
MOL000431	coumarin	Glutathione S-transferase P	DrugBank
MOL000431	coumarin	Glutathione S-transferase A2	DrugBank
MOL000431	coumarin	Aldo-keto reductase family 1 member C1	DrugBank
MOL000431	coumarin	Antizyme inhibitor 1	N/A
MOL000431	coumarin	Cytochrome P450 2A6	DrugBank
MOL000432	linolenic acid	Prostaglandin G/H synthase 1	DrugBank
MOL000432	linolenic acid	Prostaglandin G/H synthase 2	DrugBank
MOL000432	linolenic acid	Retinoic acid receptor RXR-alpha	DrugBank
MOL000432	linolenic acid	Nuclear receptor coactivator 2	DrugBank
MOL000432	linolenic acid	Retinoic acid receptor RXR-gamma	DrugBank
MOL000432	linolenic acid	Transient receptor potential cation channel subfamily V member 1	DrugBank
MOL000432	linolenic acid	Transcription factor p65	N/A
MOL000432	linolenic acid	Proliferating cell nuclear antigen	N/A
MOL000432	linolenic acid	Serum albumin	N/A
MOL000432	linolenic acid	Myc proto-oncogene protein	N/A
MOL000432	linolenic acid	Calmodulin	DrugBank
MOL000432	linolenic acid	Hepatocyte nuclear factor 4-alpha	DrugBank
MOL000432	linolenic acid	Mitochondrial uncoupling protein 2	N/A
MOL000432	linolenic acid	Hepatocyte nuclear factor 1-alpha	N/A
MOL000432	linolenic acid	Actin, cytoplasmic 1	N/A
MOL000432	linolenic acid	Tripartite motif-containing protein 26	N/A
MOL000433	FA	Cell division protein kinase 2	DrugBank
MOL000433	FA	Thrombin	DrugBank
MOL000433	FA	Glycogen synthase kinase-3 beta	DrugBank
MOL000436	(Z)-1-(2,4-dihydroxyphenyl)-3-(4-hydroxyphenyl)prop-2-en-1-one	Nitric oxide synthase, inducible	DrugBank
MOL000436	(Z)-1-(2,4-dihydroxyphenyl)-3-(4-hydroxyphenyl)prop-2-en-1-one	Prostaglandin G/H synthase 1	DrugBank
MOL000436	(Z)-1-(2,4-dihydroxyphenyl)-3-(4-hydroxyphenyl)prop-2-en-1-one	Estrogen receptor	DrugBank
MOL000436	(Z)-1-(2,4-dihydroxyphenyl)-3-(4-hydroxyphenyl)prop-2-en-1-one	Peroxisome proliferator activated receptor gamma	DrugBank
MOL000436	(Z)-1-(2,4-dihydroxyphenyl)-3-(4-hydroxyphenyl)prop-2-en-1-one	Prostaglandin G/H synthase 2	DrugBank
MOL000436	(Z)-1-(2,4-dihydroxyphenyl)-3-(4-hydroxyphenyl)prop-2-en-1-one	Carbonic anhydrase II	DrugBank
MOL000436	(Z)-1-(2,4-dihydroxyphenyl)-3-(4-hydroxyphenyl)prop-2-en-1-one	Beta-2 adrenergic receptor	DrugBank
MOL000436	(Z)-1-(2,4-dihydroxyphenyl)-3-(4-hydroxyphenyl)prop-2-en-1-one	Gamma-aminobutyric acid receptor subunit alpha-1	DrugBank
MOL000436	(Z)-1-(2,4-dihydroxyphenyl)-3-(4-hydroxyphenyl)prop-2-en-1-one	Mitogen-activated protein kinase 14	DrugBank
MOL000436	(Z)-1-(2,4-dihydroxyphenyl)-3-(4-hydroxyphenyl)prop-2-en-1-one	Glycogen synthase kinase-3 beta	DrugBank
MOL000436	(Z)-1-(2,4-dihydroxyphenyl)-3-(4-hydroxyphenyl)prop-2-en-1-one	Heat shock protein HSP 90	DrugBank
MOL000436	(Z)-1-(2,4-dihydroxyphenyl)-3-(4-hydroxyphenyl)prop-2-en-1-one	Cell division protein kinase 2	DrugBank
MOL000436	(Z)-1-(2,4-dihydroxyphenyl)-3-(4-hydroxyphenyl)prop-2-en-1-one	Phosphatidylinositol-4,5-bisphosphate 3-kinase catalytic subunit, gamma isoform	DrugBank
MOL000436	(Z)-1-(2,4-dihydroxyphenyl)-3-(4-hydroxyphenyl)prop-2-en-1-one	Beta-lactamase	DrugBank
MOL000436	(Z)-1-(2,4-dihydroxyphenyl)-3-(4-hydroxyphenyl)prop-2-en-1-one	Amine oxidase [flavin-containing] B	DrugBank
MOL000436	(Z)-1-(2,4-dihydroxyphenyl)-3-(4-hydroxyphenyl)prop-2-en-1-one	Serine/threonine-protein kinase Chk1	DrugBank
MOL000436	(Z)-1-(2,4-dihydroxyphenyl)-3-(4-hydroxyphenyl)prop-2-en-1-one	mRNA of PKA Catalytic Subunit C-alpha	DrugBank
MOL000436	(Z)-1-(2,4-dihydroxyphenyl)-3-(4-hydroxyphenyl)prop-2-en-1-one	Proto-oncogene serine/threonine-protein kinase Pim-1	DrugBank
MOL000436	(Z)-1-(2,4-dihydroxyphenyl)-3-(4-hydroxyphenyl)prop-2-en-1-one	Cyclin-A2	DrugBank
MOL000436	(Z)-1-(2,4-dihydroxyphenyl)-3-(4-hydroxyphenyl)prop-2-en-1-one	Nuclear receptor coactivator 2	DrugBank
MOL000436	(Z)-1-(2,4-dihydroxyphenyl)-3-(4-hydroxyphenyl)prop-2-en-1-one	cAMP-dependent protein kinase inhibitor alpha	DrugBank
MOL000436	(Z)-1-(2,4-dihydroxyphenyl)-3-(4-hydroxyphenyl)prop-2-en-1-one	Aldose reductase	DrugBank
MOL000437	Hirsutrin	DNA topoisomerase II	DrugBank
MOL000437	Hirsutrin	mRNA of Protein-tyrosine phosphatase, non-receptor type 1	DrugBank
MOL000437	Hirsutrin	Coagulation factor Xa	DrugBank
MOL000439	isomucronulatol-7,2'-di-O-glucosiole	DNA topoisomerase II	DrugBank
MOL000442	1,7-Dihydroxy-3,9-dimethoxy pterocarpene	Prostaglandin G/H synthase 2	DrugBank
MOL000442	1,7-Dihydroxy-3,9-dimethoxy pterocarpene	Retinoic acid receptor RXR-alpha	DrugBank
MOL000442	1,7-Dihydroxy-3,9-dimethoxy pterocarpene	Heat shock protein HSP 90	DrugBank
MOL000442	1,7-Dihydroxy-3,9-dimethoxy pterocarpene	Trypsin-1	DrugBank
MOL000054	L-	Nitric-oxide synthase, brain	DrugBank
MOL000054	L-	Prostaglandin G/H synthase 2	DrugBank
MOL000061	Prolinum	Gamma-aminobutyric-acid receptor alpha-2 subunit	DrugBank
MOL000061	Prolinum	Gamma-aminobutyric acid receptor subunit alpha-1	DrugBank
MOL000061	Prolinum	Cathepsin D	DrugBank
MOL000061	Prolinum	Peptidyl-prolyl cis-trans isomerase A	DrugBank
MOL000061	Prolinum	Cholinesterase	DrugBank
MOL000061	Prolinum	Alcohol dehydrogenase 1B	DrugBank
MOL000061	Prolinum	Alcohol dehydrogenase 1C	DrugBank
MOL000061	Prolinum	Cytochrome P450-cam	DrugBank
MOL000061	Prolinum	Lysozyme	DrugBank
MOL000061	Prolinum	Ferrichrome-iron receptor	DrugBank
MOL000061	Prolinum	Bacillolysin	DrugBank
MOL000061	Prolinum	1-aminocyclopropane-1-carboxylate deaminase	DrugBank
MOL000061	Prolinum	D-amino-acid oxidase	DrugBank
MOL000061	Prolinum	Peptidyl-prolyl cis-trans isomerase, mitochondrial	DrugBank
MOL000061	Prolinum	Glycine amidinotransferase, mitochondrial	DrugBank
MOL000061	Prolinum	Prolyl 4-hydroxylase subunit alpha-1	DrugBank
MOL000061	Prolinum	Trypsin-3	DrugBank
MOL000061	Prolinum	Gamma-aminobutyric-acid receptor subunit alpha-6	DrugBank
MOL000061	Prolinum	Prostaglandin G/H synthase 2	DrugBank
MOL000061	Prolinum	Alcohol dehydrogenase 1A	DrugBank
MOL000069	palmitic acid	Cathepsin D	DrugBank
MOL000069	palmitic acid	Alcohol dehydrogenase 1B	DrugBank
MOL000069	palmitic acid	Alcohol dehydrogenase 1C	DrugBank
MOL000069	palmitic acid	Prostaglandin G/H synthase 1	DrugBank
MOL000069	palmitic acid	Prostaglandin G/H synthase 2	DrugBank
MOL000069	palmitic acid	Rhodopsin	DrugBank
MOL000069	palmitic acid	Ig gamma-1 chain C region	DrugBank
MOL000069	palmitic acid	Ferrichrome-iron receptor	DrugBank
MOL000069	palmitic acid	Nuclear receptor coactivator 2	DrugBank
MOL000069	palmitic acid	Apoptosis regulator Bcl-2	DrugBank
MOL000069	palmitic acid	Interleukin-10	N/A
MOL000069	palmitic acid	Tumor necrosis factor	DrugBank
MOL000069	palmitic acid	Collagen alpha-1(I) chain	DrugBank
MOL000069	palmitic acid	Phosphatidylinositol-3,4,5-trisphosphate 3-phosphatase and dual-specificity protein phosphatase PTEN	N/A
MOL000069	palmitic acid	Putative beta-glucuronidase-like protein SMA3	N/A
MOL000069	palmitic acid	Solute carrier family 22 member 5	N/A
MOL000069	palmitic acid	Choline-phosphate cytidylyltransferase A	DrugBank
MOL000098	quercetin	Prostaglandin G/H synthase 1	DrugBank
MOL000098	quercetin	Androgen receptor	DrugBank
MOL000098	quercetin	Peroxisome proliferator activated receptor gamma	DrugBank
MOL000098	quercetin	Prostaglandin G/H synthase 2	DrugBank
MOL000098	quercetin	Heat shock protein HSP 90	DrugBank
MOL000098	quercetin	Phosphatidylinositol-4,5-bisphosphate 3-kinase catalytic subunit, gamma isoform	DrugBank
MOL000098	quercetin	Nuclear receptor coactivator 2	DrugBank
MOL000098	quercetin	Dipeptidyl peptidase IV	DrugBank
MOL000098	quercetin	Aldose reductase	DrugBank
MOL000098	quercetin	Trypsin-1	DrugBank
MOL000098	quercetin	DNA topoisomerase II	DrugBank
MOL000098	quercetin	Thrombin	DrugBank
MOL000098	quercetin	Potassium voltage-gated channel subfamily H member 2	DrugBank
MOL000098	quercetin	Sodium channel protein type 5 subunit alpha	DrugBank
MOL000098	quercetin	Coagulation factor Xa	DrugBank
MOL000098	quercetin	Beta-2 adrenergic receptor	DrugBank
MOL000098	quercetin	Stromelysin-1	DrugBank
MOL000098	quercetin	mRNA of PKA Catalytic Subunit C-alpha	DrugBank
MOL000098	quercetin	Coagulation factor VII	DrugBank
MOL000098	quercetin	Nitric-oxide synthase, endothelial	DrugBank
MOL000098	quercetin	Retinoic acid receptor RXR-alpha	DrugBank
MOL000098	quercetin	Acetylcholinesterase	DrugBank
MOL000098	quercetin	Gamma-aminobutyric acid receptor subunit alpha-1	DrugBank
MOL000098	quercetin	Amine oxidase [flavin-containing] B	DrugBank
MOL000098	quercetin	Transcription factor p65	N/A
MOL000098	quercetin	Epidermal growth factor receptor	DrugBank
MOL000098	quercetin	RAC-alpha serine/threonine-protein kinase	N/A
MOL000098	quercetin	Vascular endothelial growth factor A	DrugBank
MOL000098	quercetin	G1/S-specific cyclin-D1	N/A
MOL000098	quercetin	Apoptosis regulator Bcl-2	DrugBank
MOL000098	quercetin	Bcl-2-like protein 1	N/A
MOL000098	quercetin	Proto-oncogene c-Fos	N/A
MOL000098	quercetin	Cyclin-dependent kinase inhibitor 1	N/A
MOL000098	quercetin	Eukaryotic translation initiation factor 6	N/A
MOL000098	quercetin	Apoptosis regulator BAX	N/A
MOL000098	quercetin	Caspase-9	N/A
MOL000098	quercetin	Urokinase-type plasminogen activator	DrugBank
MOL000098	quercetin	72 kDa type IV collagenase	DrugBank
MOL000098	quercetin	Matrix metalloproteinase-9	N/A
MOL000098	quercetin	Mitogen-activated protein kinase 1	DrugBank
MOL000098	quercetin	Interleukin-10	N/A
MOL000098	quercetin	Pro-epidermal growth factor	DrugBank
MOL000098	quercetin	Retinoblastoma-associated protein	DrugBank
MOL000098	quercetin	Tumor necrosis factor	DrugBank
MOL000098	quercetin	Transcription factor AP-1	DrugBank
MOL000098	quercetin	Interleukin-6	DrugBank
MOL000098	quercetin	Cyclin-dependent kinase inhibitor 2A, isoforms 1/2/3	N/A
MOL000098	quercetin	Activator of 90 kDa heat shock protein ATPase homolog 1	N/A
MOL000098	quercetin	Caspase-3	N/A
MOL000098	quercetin	Cellular tumor antigen p53	DrugBank
MOL000098	quercetin	ETS domain-containing protein Elk-1	N/A
MOL000098	quercetin	NF-kappa-B inhibitor alpha	N/A
MOL000098	quercetin	NADPH--cytochrome P450 reductase	DrugBank
MOL000098	quercetin	Ornithine decarboxylase	DrugBank
MOL000098	quercetin	Xanthine dehydrogenase/oxidase	DrugBank
MOL000098	quercetin	Caspase-8	N/A
MOL000098	quercetin	DNA topoisomerase 1	DrugBank
MOL000098	quercetin	RAF proto-oncogene serine/threonine-protein kinase	N/A
MOL000098	quercetin	Superoxide dismutase [Cu-Zn]	DrugBank
MOL000098	quercetin	Protein kinase C alpha type	N/A
MOL000098	quercetin	Interstitial collagenase	DrugBank
MOL000098	quercetin	Hypoxia-inducible factor 1-alpha	N/A
MOL000098	quercetin	Signal transducer and activator of transcription 1-alpha/beta	N/A
MOL000098	quercetin	Protein CBFA2T1	N/A
MOL000098	quercetin	Probable E3 ubiquitin-protein ligase HERC5	N/A
MOL000098	quercetin	Cell division control protein 2 homolog	DrugBank
MOL000098	quercetin	78 kDa glucose-regulated protein	DrugBank
MOL000098	quercetin	Receptor tyrosine-protein kinase erbB-2	N/A
MOL000098	quercetin	Peroxisome proliferator-activated receptor gamma	N/A
MOL000098	quercetin	Acetyl-CoA carboxylase 1	DrugBank
MOL000098	quercetin	Heme oxygenase 1	DrugBank
MOL000098	quercetin	Cytochrome P450 3A4	DrugBank
MOL000098	quercetin	Cytochrome P450 1A2	DrugBank
MOL000098	quercetin	Caveolin-1	N/A
MOL000098	quercetin	Myc proto-oncogene protein	N/A
MOL000098	quercetin	Tissue factor	DrugBank
MOL000098	quercetin	Gap junction alpha-1 protein	DrugBank
MOL000098	quercetin	Cytochrome P450 1A1	N/A
MOL000098	quercetin	Intercellular adhesion molecule 1	N/A
MOL000098	quercetin	Interleukin-1 beta	DrugBank
MOL000098	quercetin	C-C motif chemokine 2	DrugBank
MOL000098	quercetin	E-selectin	DrugBank
MOL000098	quercetin	Vascular cell adhesion protein 1	DrugBank
MOL000098	quercetin	Prostaglandin E2 receptor EP3 subtype	DrugBank
MOL000098	quercetin	Interleukin-8	N/A
MOL000098	quercetin	Protein kinase C beta type	N/A
MOL000098	quercetin	Baculoviral IAP repeat-containing protein 5	N/A
MOL000098	quercetin	Dual oxidase 2	N/A
MOL000098	quercetin	Nitric oxide synthase, endothelial	N/A
MOL000098	quercetin	Heat shock protein beta-1	N/A
MOL000098	quercetin	Transforming growth factor beta-1	N/A
MOL000098	quercetin	Estrogen sulfotransferase	DrugBank
MOL000098	quercetin	Maltase-glucoamylase, intestinal	DrugBank
MOL000098	quercetin	Interleukin-2	DrugBank
MOL000098	quercetin	Nuclear receptor subfamily 1 group I member 2	N/A
MOL000098	quercetin	Cytochrome P450 1B1	N/A
MOL000098	quercetin	G2/mitotic-specific cyclin-B1	N/A
MOL000098	quercetin	Tissue-type plasminogen activator	DrugBank
MOL000098	quercetin	Thrombomodulin	DrugBank
MOL000098	quercetin	Plasminogen activator inhibitor 1	N/A
MOL000098	quercetin	Collagen alpha-1(I) chain	DrugBank
MOL000098	quercetin	Interferon gamma	DrugBank
MOL000098	quercetin	Arachidonate 5-lipoxygenase	DrugBank
MOL000098	quercetin	Phosphatidylinositol-3,4,5-trisphosphate 3-phosphatase and dual-specificity protein phosphatase PTEN	N/A
MOL000098	quercetin	Interleukin-1 alpha	N/A
MOL000098	quercetin	Myeloperoxidase	DrugBank
MOL000098	quercetin	DNA topoisomerase 2-alpha	N/A
MOL000098	quercetin	Neutrophil cytosol factor 1	N/A
MOL000098	quercetin	ATP-binding cassette sub-family G member 2	N/A
MOL000098	quercetin	Hyaluronan synthase 2	N/A
MOL000098	quercetin	Glutathione S-transferase P	DrugBank
MOL000098	quercetin	Nuclear factor erythroid 2-related factor 2	N/A
MOL000098	quercetin	NAD(P)H dehydrogenase [quinone] 1	DrugBank
MOL000098	quercetin	Poly [ADP-ribose] polymerase 1	N/A
MOL000098	quercetin	Aryl hydrocarbon receptor	DrugBank
MOL000098	quercetin	26S proteasome non-ATPase regulatory subunit 3	N/A
MOL000098	quercetin	Solute carrier family 2, facilitated glucose transporter member 4	N/A
MOL000098	quercetin	Collagen alpha-1(III) chain	DrugBank
MOL000098	quercetin	DNA gyrase subunit B	DrugBank
MOL000098	quercetin	C-X-C motif chemokine 11	N/A
MOL000098	quercetin	C-X-C motif chemokine 2	N/A
MOL000098	quercetin	DDB1- and CUL4-associated factor 5	N/A
MOL000098	quercetin	Nuclear receptor subfamily 1 group I member 3	N/A
MOL000098	quercetin	Serine/threonine-protein kinase Chk2	N/A
MOL000098	quercetin	Insulin receptor	DrugBank
MOL000098	quercetin	Claudin-4	N/A
MOL000098	quercetin	Peroxisome proliferator-activated receptor alpha	N/A
MOL000098	quercetin	Peroxisome proliferator-activated receptor delta	N/A
MOL000098	quercetin	Heat shock factor protein 1	N/A
MOL000098	quercetin	C-reactive protein	N/A
MOL000098	quercetin	C-X-C motif chemokine 10	N/A
MOL000098	quercetin	Inhibitor of nuclear factor kappa-B kinase subunit alpha	N/A
MOL000098	quercetin	Osteopontin	N/A
MOL000098	quercetin	Runt-related transcription factor 2	N/A
MOL000098	quercetin	Ras association domain-containing protein 1	N/A
MOL000098	quercetin	Transcription factor E2F1	N/A
MOL000098	quercetin	Transcription factor E2F2	N/A
MOL000098	quercetin	Prostatic acid phosphatase	DrugBank
MOL000098	quercetin	Cathepsin D	DrugBank
MOL000098	quercetin	Insulin-like growth factor-binding protein 3	N/A
MOL000098	quercetin	Insulin-like growth factor II	N/A
MOL000098	quercetin	CD40 ligand	N/A
MOL000098	quercetin	Interferon regulatory factor 1	N/A
MOL000098	quercetin	Receptor tyrosine-protein kinase erbB-3	N/A
MOL000098	quercetin	Serum paraoxonase/arylesterase 1	DrugBank
MOL000098	quercetin	Type I iodothyronine deiodinase	N/A
MOL000098	quercetin	Procollagen C-endopeptidase enhancer 1	N/A
MOL000098	quercetin	Puromycin-sensitive aminopeptidase	N/A
MOL000098	quercetin	Hexokinase-2	N/A
MOL000098	quercetin	Homeobox protein Nkx-3.1	N/A
MOL000098	quercetin	Ras GTPase-activating protein 1	N/A
MOL000098	quercetin	Peroxidase C1A	N/A
MOL000098	quercetin	Glutathione S-transferase Mu 1	DrugBank
MOL000098	quercetin	Glutathione S-transferase Mu 2	DrugBank
MOL001323	Sitosterol alpha1	Progesterone receptor	DrugBank
MOL001323	Sitosterol alpha1	Prostaglandin G/H synthase 2	DrugBank
MOL001323	Sitosterol alpha1	Gamma-aminobutyric acid receptor subunit alpha-1	DrugBank
MOL001323	Sitosterol alpha1	Alcohol dehydrogenase 1C	DrugBank
MOL001323	Sitosterol alpha1	Cytochrome P450-cam	DrugBank
MOL001323	Sitosterol alpha1	Mineralocorticoid receptor	DrugBank
MOL003578	Cycloartenol	Mineralocorticoid receptor	DrugBank
MOL001494	Mandenol	Prostaglandin G/H synthase 1	DrugBank
MOL001494	Mandenol	Prostaglandin G/H synthase 2	DrugBank
MOL001494	Mandenol	Nuclear receptor coactivator 2	DrugBank
MOL001979	LAN	Progesterone receptor	DrugBank
MOL001979	LAN	Mineralocorticoid receptor	DrugBank
MOL001979	LAN	Nuclear receptor coactivator 2	DrugBank
MOL001495	Ethyl linolenate	Prostaglandin G/H synthase 1	DrugBank
MOL001495	Ethyl linolenate	Nuclear receptor coactivator 2	DrugBank
MOL000449	Stigmasterol	Progesterone receptor	DrugBank
MOL000449	Stigmasterol	Mineralocorticoid receptor	DrugBank
MOL000449	Stigmasterol	Nuclear receptor coactivator 2	DrugBank
MOL000449	Stigmasterol	Alcohol dehydrogenase 1C	DrugBank
MOL000449	Stigmasterol	Ig gamma-1 chain C region	DrugBank
MOL000449	Stigmasterol	Retinoic acid receptor RXR-alpha	DrugBank
MOL000449	Stigmasterol	Nuclear receptor coactivator 1	DrugBank
MOL000449	Stigmasterol	Prostaglandin G/H synthase 1	DrugBank
MOL000449	Stigmasterol	Prostaglandin G/H synthase 2	DrugBank
MOL000449	Stigmasterol	Alpha-2A adrenergic receptor	DrugBank
MOL000449	Stigmasterol	Sodium-dependent noradrenaline transporter	DrugBank
MOL000449	Stigmasterol	Sodium-dependent dopamine transporter	DrugBank
MOL000449	Stigmasterol	Beta-2 adrenergic receptor	DrugBank
MOL000449	Stigmasterol	Aldose reductase	DrugBank
MOL000449	Stigmasterol	Urokinase-type plasminogen activator	DrugBank
MOL000449	Stigmasterol	Leukotriene A-4 hydrolase	DrugBank
MOL000449	Stigmasterol	Amine oxidase [flavin-containing] B	DrugBank
MOL000449	Stigmasterol	Amine oxidase [flavin-containing] A	DrugBank
MOL000449	Stigmasterol	mRNA of PKA Catalytic Subunit C-alpha	DrugBank
MOL000449	Stigmasterol	Chymotrypsinogen B	DrugBank
MOL000449	Stigmasterol	Muscarinic acetylcholine receptor M3	DrugBank
MOL000449	Stigmasterol	Muscarinic acetylcholine receptor M1	DrugBank
MOL000449	Stigmasterol	Beta-1 adrenergic receptor	DrugBank
MOL000449	Stigmasterol	Sodium channel protein type 5 subunit alpha	DrugBank
MOL000449	Stigmasterol	5-hydroxytryptamine 2A receptor	DrugBank
MOL000449	Stigmasterol	Alpha-1A adrenergic receptor	DrugBank
MOL000449	Stigmasterol	Gamma-aminobutyric-acid receptor alpha-3 subunit	DrugBank
MOL000449	Stigmasterol	Muscarinic acetylcholine receptor M2	DrugBank
MOL000449	Stigmasterol	Alpha-1B adrenergic receptor	DrugBank
MOL000449	Stigmasterol	Gamma-aminobutyric acid receptor subunit alpha-1	DrugBank
MOL000449	Stigmasterol	Neuronal acetylcholine receptor protein, alpha-7 chain	DrugBank
MOL000358	beta-sitosterol	Progesterone receptor	DrugBank
MOL000358	beta-sitosterol	Nuclear receptor coactivator 2	DrugBank
MOL000358	beta-sitosterol	Prostaglandin G/H synthase 1	DrugBank
MOL000358	beta-sitosterol	Prostaglandin G/H synthase 2	DrugBank
MOL000358	beta-sitosterol	Heat shock protein HSP 90	DrugBank
MOL000358	beta-sitosterol	Phosphatidylinositol-4,5-bisphosphate 3-kinase catalytic subunit, gamma isoform	DrugBank
MOL000358	beta-sitosterol	Potassium voltage-gated channel subfamily H member 2	DrugBank
MOL000358	beta-sitosterol	mRNA of PKA Catalytic Subunit C-alpha	DrugBank
MOL000358	beta-sitosterol	Dopamine D1 receptor	DrugBank
MOL000358	beta-sitosterol	Muscarinic acetylcholine receptor M3	DrugBank
MOL000358	beta-sitosterol	Muscarinic acetylcholine receptor M1	DrugBank
MOL000358	beta-sitosterol	Sodium channel protein type 5 subunit alpha	DrugBank
MOL000358	beta-sitosterol	Gamma-aminobutyric-acid receptor alpha-2 subunit	DrugBank
MOL000358	beta-sitosterol	Muscarinic acetylcholine receptor M4	DrugBank
MOL000358	beta-sitosterol	CGMP-inhibited 3',5'-cyclic phosphodiesterase A	DrugBank
MOL000358	beta-sitosterol	5-hydroxytryptamine 2A receptor	DrugBank
MOL000358	beta-sitosterol	Gamma-aminobutyric-acid receptor alpha-5 subunit	DrugBank
MOL000358	beta-sitosterol	Alpha-1A adrenergic receptor	DrugBank
MOL000358	beta-sitosterol	Gamma-aminobutyric-acid receptor alpha-3 subunit	DrugBank
MOL000358	beta-sitosterol	Muscarinic acetylcholine receptor M2	DrugBank
MOL000358	beta-sitosterol	Alpha-1B adrenergic receptor	DrugBank
MOL000358	beta-sitosterol	Beta-2 adrenergic receptor	DrugBank
MOL000358	beta-sitosterol	Neuronal acetylcholine receptor subunit alpha-2	DrugBank
MOL000358	beta-sitosterol	Sodium-dependent serotonin transporter	DrugBank
MOL000358	beta-sitosterol	Mu-type opioid receptor	DrugBank
MOL000358	beta-sitosterol	Gamma-aminobutyric acid receptor subunit alpha-1	DrugBank
MOL000358	beta-sitosterol	Neuronal acetylcholine receptor protein, alpha-7 chain	DrugBank
MOL000358	beta-sitosterol	Cytochrome P450-cam	DrugBank
MOL000358	beta-sitosterol	Apoptosis regulator Bcl-2	DrugBank
MOL000358	beta-sitosterol	Apoptosis regulator BAX	N/A
MOL000358	beta-sitosterol	Caspase-9	N/A
MOL000358	beta-sitosterol	Transcription factor AP-1	DrugBank
MOL000358	beta-sitosterol	Caspase-3	N/A
MOL000358	beta-sitosterol	Caspase-8	N/A
MOL000358	beta-sitosterol	Protein kinase C alpha type	N/A
MOL000358	beta-sitosterol	Transforming growth factor beta-1	N/A
MOL000358	beta-sitosterol	Serum paraoxonase/arylesterase 1	DrugBank
MOL000358	beta-sitosterol	Microtubule-associated protein 2	DrugBank
MOL005406	atropine	Dopamine D1 receptor	DrugBank
MOL005406	atropine	Muscarinic acetylcholine receptor M3	DrugBank
MOL005406	atropine	Muscarinic acetylcholine receptor M1	DrugBank
MOL005406	atropine	Beta-1 adrenergic receptor	DrugBank
MOL005406	atropine	Muscarinic acetylcholine receptor M5	DrugBank
MOL005406	atropine	Alpha-2A adrenergic receptor	DrugBank
MOL005406	atropine	Alpha-2C adrenergic receptor	DrugBank
MOL005406	atropine	Muscarinic acetylcholine receptor M4	DrugBank
MOL005406	atropine	Delta-type opioid receptor	DrugBank
MOL005406	atropine	5-hydroxytryptamine 2A receptor	DrugBank
MOL005406	atropine	Sodium-dependent noradrenaline transporter	DrugBank
MOL005406	atropine	Alpha-1A adrenergic receptor	DrugBank
MOL005406	atropine	5-hydroxytryptamine 2C receptor	DrugBank
MOL005406	atropine	Muscarinic acetylcholine receptor M2	DrugBank
MOL005406	atropine	Alpha-2B adrenergic receptor	DrugBank
MOL005406	atropine	Alpha-1B adrenergic receptor	DrugBank
MOL005406	atropine	Sodium-dependent dopamine transporter	DrugBank
MOL005406	atropine	Beta-2 adrenergic receptor	DrugBank
MOL005406	atropine	Sodium-dependent serotonin transporter	DrugBank
MOL005406	atropine	D(2) dopamine receptor	DrugBank
MOL005406	atropine	Mu-type opioid receptor	DrugBank
MOL005406	atropine	Gamma-aminobutyric acid receptor subunit alpha-1	DrugBank
MOL005406	atropine	5-hydroxytryptamine 1B receptor	DrugBank
MOL005406	atropine	Histamine H1 receptor	DrugBank
MOL005406	atropine	5-hydroxytryptamine 1A receptor	DrugBank
MOL005438	campesterol	Progesterone receptor	DrugBank
MOL006209	cyanin	Prostaglandin G/H synthase 2	DrugBank
MOL006209	cyanin	Heat shock protein HSP 90	DrugBank
MOL007449	24-methylidenelophenol	Progesterone receptor	DrugBank
MOL007449	24-methylidenelophenol	Nuclear receptor coactivator 2	DrugBank
MOL007449	24-methylidenelophenol	Mineralocorticoid receptor	DrugBank
MOL008173	daucosterol_qt	Progesterone receptor	DrugBank
MOL008173	daucosterol_qt	Nuclear receptor coactivator 2	DrugBank
MOL008400	glycitein	Prostaglandin G/H synthase 1	DrugBank
MOL008400	glycitein	Estrogen receptor	DrugBank
MOL008400	glycitein	Androgen receptor	DrugBank
MOL008400	glycitein	Peroxisome proliferator activated receptor gamma	DrugBank
MOL008400	glycitein	Prostaglandin G/H synthase 2	DrugBank
MOL008400	glycitein	Retinoic acid receptor RXR-alpha	DrugBank
MOL008400	glycitein	CGMP-inhibited 3',5'-cyclic phosphodiesterase A	DrugBank
MOL008400	glycitein	Estrogen receptor beta	DrugBank
MOL008400	glycitein	Mitogen-activated protein kinase 14	DrugBank
MOL008400	glycitein	Glycogen synthase kinase-3 beta	DrugBank
MOL008400	glycitein	Heat shock protein HSP 90	DrugBank
MOL008400	glycitein	Cell division protein kinase 2	DrugBank
MOL008400	glycitein	Serine/threonine-protein kinase Chk1	DrugBank
MOL008400	glycitein	Trypsin-1	DrugBank
MOL008400	glycitein	Proto-oncogene serine/threonine-protein kinase Pim-1	DrugBank
MOL008400	glycitein	Cyclin-A2	DrugBank
MOL008400	glycitein	Calmodulin	DrugBank
MOL008400	glycitein	mRNA of PKA Catalytic Subunit C-alpha	DrugBank
MOL008400	glycitein	Nuclear receptor coactivator 1	DrugBank
MOL008400	glycitein	Nitric oxide synthase, inducible	DrugBank
MOL008400	glycitein	Amyloid beta A4 protein	DrugBank
MOL008400	glycitein	Collagenase 3	DrugBank
MOL008400	glycitein	Neutrophil collagenase	DrugBank
MOL000953	CLR	Progesterone receptor	DrugBank
MOL000953	CLR	Mineralocorticoid receptor	DrugBank
MOL000953	CLR	Cytochrome P450-cam	DrugBank
MOL000953	CLR	Nuclear receptor coactivator 2	DrugBank
MOL009604	14b-pregnane	Prostaglandin G/H synthase 2	DrugBank
MOL009604	14b-pregnane	Progesterone receptor	DrugBank
MOL009604	14b-pregnane	Nuclear receptor coactivator 2	DrugBank
MOL009617	24-ethylcholest-22-enol	Progesterone receptor	DrugBank
MOL009618	24-ethylcholesta-5,22-dienol	Progesterone receptor	DrugBank
MOL009618	24-ethylcholesta-5,22-dienol	Mineralocorticoid receptor	DrugBank
MOL009620	24-methyl-31-norlanost-9(11)-enol	Progesterone receptor	DrugBank
MOL009621	24-methylenelanost-8-enol	Progesterone receptor	DrugBank
MOL009622	Fucosterol	Progesterone receptor	DrugBank
MOL009622	Fucosterol	Mineralocorticoid receptor	DrugBank
MOL009622	Fucosterol	Nuclear receptor coactivator 2	DrugBank
MOL009633	31-norlanost-9(11)-enol	Progesterone receptor	DrugBank
MOL009634	31-norlanosterol	Progesterone receptor	DrugBank
MOL009634	31-norlanosterol	Mineralocorticoid receptor	DrugBank
MOL009634	31-norlanosterol	Nuclear receptor coactivator 2	DrugBank
MOL009635	4,24-methyllophenol	Progesterone receptor	DrugBank
MOL009639	Lophenol	Progesterone receptor	DrugBank
MOL009640	4alpha,14alpha,24-trimethylcholesta-8,24-dienol	Progesterone receptor	DrugBank
MOL009641	4alpha,24-dimethylcholesta-7,24-dienol	Progesterone receptor	DrugBank
MOL009641	4alpha,24-dimethylcholesta-7,24-dienol	Mineralocorticoid receptor	DrugBank
MOL009641	4alpha,24-dimethylcholesta-7,24-dienol	Nuclear receptor coactivator 2	DrugBank
MOL009644	6-Fluoroindole-7-Dehydrocholesterol	Progesterone receptor	DrugBank
MOL009644	6-Fluoroindole-7-Dehydrocholesterol	Mineralocorticoid receptor	DrugBank
MOL009644	6-Fluoroindole-7-Dehydrocholesterol	Glucocorticoid receptor	DrugBank
MOL009646	7-O-Methylluteolin-6-C-beta-glucoside_qt	Prostaglandin G/H synthase 2	DrugBank
MOL009646	7-O-Methylluteolin-6-C-beta-glucoside_qt	DNA topoisomerase II	DrugBank
MOL009646	7-O-Methylluteolin-6-C-beta-glucoside_qt	Heat shock protein HSP 90	DrugBank
MOL009646	7-O-Methylluteolin-6-C-beta-glucoside_qt	Nuclear receptor coactivator 2	DrugBank
MOL009646	7-O-Methylluteolin-6-C-beta-glucoside_qt	Calmodulin	DrugBank
MOL009650	Atropine	Dopamine D1 receptor	DrugBank
MOL009650	Atropine	Muscarinic acetylcholine receptor M3	DrugBank
MOL009650	Atropine	Muscarinic acetylcholine receptor M1	DrugBank
MOL009650	Atropine	D(1B) dopamine receptor	DrugBank
MOL009650	Atropine	Beta-1 adrenergic receptor	DrugBank
MOL009650	Atropine	Sodium channel protein type 5 subunit alpha	DrugBank
MOL009650	Atropine	Muscarinic acetylcholine receptor M5	DrugBank
MOL009650	Atropine	Alpha-2A adrenergic receptor	DrugBank
MOL009650	Atropine	5-hydroxytryptamine 1A receptor	DrugBank
MOL009650	Atropine	Alpha-2C adrenergic receptor	DrugBank
MOL009650	Atropine	Muscarinic acetylcholine receptor M4	DrugBank
MOL009650	Atropine	Delta-type opioid receptor	DrugBank
MOL009650	Atropine	Histamine H1 receptor	DrugBank
MOL009650	Atropine	5-hydroxytryptamine 2A receptor	DrugBank
MOL009650	Atropine	Sodium-dependent noradrenaline transporter	DrugBank
MOL009650	Atropine	Alpha-1A adrenergic receptor	DrugBank
MOL009650	Atropine	5-hydroxytryptamine 2C receptor	DrugBank
MOL009650	Atropine	Muscarinic acetylcholine receptor M2	DrugBank
MOL009650	Atropine	Alpha-2B adrenergic receptor	DrugBank
MOL009650	Atropine	Alpha-1B adrenergic receptor	DrugBank
MOL009650	Atropine	Sodium-dependent dopamine transporter	DrugBank
MOL009650	Atropine	Beta-2 adrenergic receptor	DrugBank
MOL009650	Atropine	Sodium-dependent serotonin transporter	DrugBank
MOL009650	Atropine	D(2) dopamine receptor	DrugBank
MOL009650	Atropine	Mu-type opioid receptor	DrugBank
MOL009650	Atropine	Gamma-aminobutyric acid receptor subunit alpha-1	DrugBank
MOL009650	Atropine	5-hydroxytryptamine 1B receptor	DrugBank
MOL009656	(E,E)-1-ethyl octadeca-3,13-dienoate	Nuclear receptor coactivator 2	DrugBank
MOL009665	Physcion-8-O-beta-D-gentiobioside	DNA topoisomerase II	DrugBank
MOL009677	lanost-8-en-3beta-ol	Progesterone receptor	DrugBank
MOL009677	lanost-8-en-3beta-ol	Mineralocorticoid receptor	DrugBank
MOL009678	lanost-8-enol	Progesterone receptor	DrugBank
MOL009678	lanost-8-enol	Mineralocorticoid receptor	DrugBank
MOL009681	Obtusifoliol	Progesterone receptor	DrugBank
MOL009681	Obtusifoliol	Mineralocorticoid receptor	DrugBank
MOL009681	Obtusifoliol	Nuclear receptor coactivator 2	DrugBank
MOL001792	DFV	Prostaglandin G/H synthase 1	DrugBank
MOL001792	DFV	Estrogen receptor	DrugBank
MOL001792	DFV	Prostaglandin G/H synthase 2	DrugBank
MOL001792	DFV	Retinoic acid receptor RXR-alpha	DrugBank
MOL001792	DFV	Beta-2 adrenergic receptor	DrugBank
MOL001792	DFV	Heat shock protein HSP 90	DrugBank
MOL001792	DFV	Phosphatidylinositol-4,5-bisphosphate 3-kinase catalytic subunit, gamma isoform	DrugBank
MOL001792	DFV	mRNA of PKA Catalytic Subunit C-alpha	DrugBank
MOL001792	DFV	Beta-lactamase	DrugBank
MOL001792	DFV	Amine oxidase [flavin-containing] B	DrugBank
MOL001792	DFV	Sodium-dependent serotonin transporter	DrugBank
MOL001792	DFV	cAMP-dependent protein kinase inhibitor alpha	DrugBank
MOL002714	baicalein	Prostaglandin G/H synthase 1	DrugBank
MOL002714	baicalein	Androgen receptor	DrugBank
MOL002714	baicalein	Prostaglandin G/H synthase 2	DrugBank
MOL002714	baicalein	Heat shock protein HSP 90	DrugBank
MOL002714	baicalein	mRNA of PKA Catalytic Subunit C-alpha	DrugBank
MOL002714	baicalein	Dipeptidyl peptidase IV	DrugBank
MOL002714	baicalein	Phosphatidylinositol-4,5-bisphosphate 3-kinase catalytic subunit, gamma isoform	DrugBank
MOL002714	baicalein	CGMP-inhibited 3',5'-cyclic phosphodiesterase A	DrugBank
MOL002714	baicalein	Trypsin-1	DrugBank
MOL002714	baicalein	Nuclear receptor coactivator 2	DrugBank
MOL002714	baicalein	Nuclear receptor coactivator 1	DrugBank
MOL002714	baicalein	Calmodulin	DrugBank
MOL002714	baicalein	Transcription factor p65	N/A
MOL002714	baicalein	RAC-alpha serine/threonine-protein kinase	N/A
MOL002714	baicalein	Vascular endothelial growth factor A	DrugBank
MOL002714	baicalein	Apoptosis regulator Bcl-2	DrugBank
MOL002714	baicalein	Proto-oncogene c-Fos	N/A
MOL002714	baicalein	Apoptosis regulator BAX	N/A
MOL002714	baicalein	Matrix metalloproteinase-9	N/A
MOL002714	baicalein	Caspase-3	N/A
MOL002714	baicalein	Cellular tumor antigen p53	DrugBank
MOL002714	baicalein	Hypoxia-inducible factor 1-alpha	N/A
MOL002714	baicalein	Fos-related antigen 1	N/A
MOL002714	baicalein	Fos-related antigen 2	N/A
MOL002714	baicalein	Cell division control protein 2 homolog	DrugBank
MOL002714	baicalein	G2/mitotic-specific cyclin-B1	N/A
MOL002714	baicalein	Myeloperoxidase	DrugBank
MOL002714	baicalein	Aryl hydrocarbon receptor	DrugBank
MOL002714	baicalein	Insulin-like growth factor II	N/A
MOL002714	baicalein	Cytochrome c	DrugBank
MOL002714	baicalein	Arachidonate 12-lipoxygenase, 12S-type	N/A
MOL002714	baicalein	Nuclear factor of activated T-cells, cytoplasmic 1	N/A
MOL002714	baicalein	Tudor domain-containing protein 7	N/A
MOL002714	baicalein	Egl nine homolog 1	DrugBank
MOL002714	baicalein	NADPH oxidase 5	N/A
MOL002714	baicalein	Fatty acid-binding protein, epidermal	N/A
MOL002714	baicalein	Apolipoprotein D	N/A
MOL002959	3'-Methoxydaidzein	Nitric oxide synthase, inducible	DrugBank
MOL002959	3'-Methoxydaidzein	Prostaglandin G/H synthase 1	DrugBank
MOL002959	3'-Methoxydaidzein	Estrogen receptor	DrugBank
MOL002959	3'-Methoxydaidzein	Androgen receptor	DrugBank
MOL002959	3'-Methoxydaidzein	Peroxisome proliferator activated receptor gamma	DrugBank
MOL002959	3'-Methoxydaidzein	Prostaglandin G/H synthase 2	DrugBank
MOL002959	3'-Methoxydaidzein	Retinoic acid receptor RXR-alpha	DrugBank
MOL002959	3'-Methoxydaidzein	Estrogen receptor beta	DrugBank
MOL002959	3'-Methoxydaidzein	Mitogen-activated protein kinase 14	DrugBank
MOL002959	3'-Methoxydaidzein	Glycogen synthase kinase-3 beta	DrugBank
MOL002959	3'-Methoxydaidzein	Heat shock protein HSP 90	DrugBank
MOL002959	3'-Methoxydaidzein	Cell division protein kinase 2	DrugBank
MOL002959	3'-Methoxydaidzein	Serine/threonine-protein kinase Chk1	DrugBank
MOL002959	3'-Methoxydaidzein	mRNA of PKA Catalytic Subunit C-alpha	DrugBank
MOL002959	3'-Methoxydaidzein	Trypsin-1	DrugBank
MOL002959	3'-Methoxydaidzein	Proto-oncogene serine/threonine-protein kinase Pim-1	DrugBank
MOL002959	3'-Methoxydaidzein	Cyclin-A2	DrugBank
MOL002959	3'-Methoxydaidzein	Nuclear receptor coactivator 1	DrugBank
MOL002959	3'-Methoxydaidzein	Calmodulin	DrugBank
MOL000358	beta-sitosterol	Progesterone receptor	DrugBank
MOL000358	beta-sitosterol	Nuclear receptor coactivator 2	DrugBank
MOL000358	beta-sitosterol	Prostaglandin G/H synthase 1	DrugBank
MOL000358	beta-sitosterol	Prostaglandin G/H synthase 2	DrugBank
MOL000358	beta-sitosterol	Heat shock protein HSP 90	DrugBank
MOL000358	beta-sitosterol	Phosphatidylinositol-4,5-bisphosphate 3-kinase catalytic subunit, gamma isoform	DrugBank
MOL000358	beta-sitosterol	Potassium voltage-gated channel subfamily H member 2	DrugBank
MOL000358	beta-sitosterol	mRNA of PKA Catalytic Subunit C-alpha	DrugBank
MOL000358	beta-sitosterol	Dopamine D1 receptor	DrugBank
MOL000358	beta-sitosterol	Muscarinic acetylcholine receptor M3	DrugBank
MOL000358	beta-sitosterol	Muscarinic acetylcholine receptor M1	DrugBank
MOL000358	beta-sitosterol	Sodium channel protein type 5 subunit alpha	DrugBank
MOL000358	beta-sitosterol	Gamma-aminobutyric-acid receptor alpha-2 subunit	DrugBank
MOL000358	beta-sitosterol	Muscarinic acetylcholine receptor M4	DrugBank
MOL000358	beta-sitosterol	CGMP-inhibited 3',5'-cyclic phosphodiesterase A	DrugBank
MOL000358	beta-sitosterol	5-hydroxytryptamine 2A receptor	DrugBank
MOL000358	beta-sitosterol	Gamma-aminobutyric-acid receptor alpha-5 subunit	DrugBank
MOL000358	beta-sitosterol	Alpha-1A adrenergic receptor	DrugBank
MOL000358	beta-sitosterol	Gamma-aminobutyric-acid receptor alpha-3 subunit	DrugBank
MOL000358	beta-sitosterol	Muscarinic acetylcholine receptor M2	DrugBank
MOL000358	beta-sitosterol	Alpha-1B adrenergic receptor	DrugBank
MOL000358	beta-sitosterol	Beta-2 adrenergic receptor	DrugBank
MOL000358	beta-sitosterol	Neuronal acetylcholine receptor subunit alpha-2	DrugBank
MOL000358	beta-sitosterol	Sodium-dependent serotonin transporter	DrugBank
MOL000358	beta-sitosterol	Mu-type opioid receptor	DrugBank
MOL000358	beta-sitosterol	Gamma-aminobutyric acid receptor subunit alpha-1	DrugBank
MOL000358	beta-sitosterol	Neuronal acetylcholine receptor protein, alpha-7 chain	DrugBank
MOL000358	beta-sitosterol	Cytochrome P450-cam	DrugBank
MOL000358	beta-sitosterol	Apoptosis regulator Bcl-2	DrugBank
MOL000358	beta-sitosterol	Apoptosis regulator BAX	N/A
MOL000358	beta-sitosterol	Caspase-9	N/A
MOL000358	beta-sitosterol	Transcription factor AP-1	DrugBank
MOL000358	beta-sitosterol	Caspase-3	N/A
MOL000358	beta-sitosterol	Caspase-8	N/A
MOL000358	beta-sitosterol	Protein kinase C alpha type	N/A
MOL000358	beta-sitosterol	Transforming growth factor beta-1	N/A
MOL000358	beta-sitosterol	Serum paraoxonase/arylesterase 1	DrugBank
MOL000358	beta-sitosterol	Microtubule-associated protein 2	DrugBank
MOL000359	sitosterol	Progesterone receptor	DrugBank
MOL000359	sitosterol	Nuclear receptor coactivator 2	DrugBank
MOL000359	sitosterol	Mineralocorticoid receptor	DrugBank
MOL004941	(2R)-7-hydroxy-2-(4-hydroxyphenyl)chroman-4-one	Prostaglandin G/H synthase 1	DrugBank
MOL004941	(2R)-7-hydroxy-2-(4-hydroxyphenyl)chroman-4-one	Estrogen receptor	DrugBank
MOL004941	(2R)-7-hydroxy-2-(4-hydroxyphenyl)chroman-4-one	Prostaglandin G/H synthase 2	DrugBank
MOL004941	(2R)-7-hydroxy-2-(4-hydroxyphenyl)chroman-4-one	Retinoic acid receptor RXR-alpha	DrugBank
MOL004941	(2R)-7-hydroxy-2-(4-hydroxyphenyl)chroman-4-one	CGMP-inhibited 3',5'-cyclic phosphodiesterase A	DrugBank
MOL004941	(2R)-7-hydroxy-2-(4-hydroxyphenyl)chroman-4-one	Beta-2 adrenergic receptor	DrugBank
MOL004941	(2R)-7-hydroxy-2-(4-hydroxyphenyl)chroman-4-one	Heat shock protein HSP 90	DrugBank
MOL004941	(2R)-7-hydroxy-2-(4-hydroxyphenyl)chroman-4-one	Phosphatidylinositol-4,5-bisphosphate 3-kinase catalytic subunit, gamma isoform	DrugBank
MOL004941	(2R)-7-hydroxy-2-(4-hydroxyphenyl)chroman-4-one	Beta-lactamase	DrugBank
MOL004941	(2R)-7-hydroxy-2-(4-hydroxyphenyl)chroman-4-one	Amine oxidase [flavin-containing] B	DrugBank
MOL004941	(2R)-7-hydroxy-2-(4-hydroxyphenyl)chroman-4-one	mRNA of PKA Catalytic Subunit C-alpha	DrugBank
MOL004941	(2R)-7-hydroxy-2-(4-hydroxyphenyl)chroman-4-one	cAMP-dependent protein kinase inhibitor alpha	DrugBank
MOL004941	(2R)-7-hydroxy-2-(4-hydroxyphenyl)chroman-4-one	Calmodulin	DrugBank
MOL004941	(2R)-7-hydroxy-2-(4-hydroxyphenyl)chroman-4-one	Gamma-aminobutyric acid receptor subunit alpha-1	DrugBank
MOL004941	(2R)-7-hydroxy-2-(4-hydroxyphenyl)chroman-4-one	Sodium-dependent serotonin transporter	DrugBank
MOL000546	diosgenin	Progesterone receptor	DrugBank
MOL000546	diosgenin	Mineralocorticoid receptor	DrugBank
MOL000546	diosgenin	Transcription factor p65	N/A
MOL000546	diosgenin	RAC-alpha serine/threonine-protein kinase	N/A
MOL000546	diosgenin	Vascular endothelial growth factor A	DrugBank
MOL000546	diosgenin	Cyclin-dependent kinase inhibitor 1	N/A
MOL000546	diosgenin	Cellular tumor antigen p53	DrugBank
MOL000546	diosgenin	Prostaglandin G/H synthase 2	DrugBank
MOL000546	diosgenin	Fatty acid synthase	DrugBank
MOL000546	diosgenin	Superoxide dismutase [Cu-Zn]	DrugBank
MOL000546	diosgenin	Catalase	DrugBank
MOL000546	diosgenin	Hypoxia-inducible factor 1-alpha	N/A
MOL000546	diosgenin	Nuclear receptor subfamily 1 group I member 2	N/A
MOL000546	diosgenin	Cytosolic phospholipase A2	DrugBank
MOL000546	diosgenin	Canalicular multispecific organic anion transporter 1	N/A
MOL000546	diosgenin	Serine/threonine-protein kinase mTOR	DrugBank
MOL006331	4',5-Dihydroxyflavone	Prostaglandin G/H synthase 1	DrugBank
MOL006331	4',5-Dihydroxyflavone	Androgen receptor	DrugBank
MOL006331	4',5-Dihydroxyflavone	Prostaglandin G/H synthase 2	DrugBank
MOL006331	4',5-Dihydroxyflavone	Dipeptidyl peptidase IV	DrugBank
MOL006331	4',5-Dihydroxyflavone	Heat shock protein HSP 90	DrugBank
MOL006331	4',5-Dihydroxyflavone	Phosphatidylinositol-4,5-bisphosphate 3-kinase catalytic subunit, gamma isoform	DrugBank
MOL006331	4',5-Dihydroxyflavone	Amine oxidase [flavin-containing] B	DrugBank
MOL006331	4',5-Dihydroxyflavone	mRNA of PKA Catalytic Subunit C-alpha	DrugBank
MOL009763	(+)-Syringaresinol-O-beta-D-glucoside	DNA topoisomerase II	DrugBank
MOL002879	Diop	Sodium channel protein type 5 subunit alpha	DrugBank
MOL002879	Diop	Beta-2 adrenergic receptor	DrugBank
MOL002879	Diop	Muscarinic acetylcholine receptor M3	DrugBank
MOL000449	Stigmasterol	Progesterone receptor	DrugBank
MOL000449	Stigmasterol	Mineralocorticoid receptor	DrugBank
MOL000449	Stigmasterol	Nuclear receptor coactivator 2	DrugBank
MOL000449	Stigmasterol	Alcohol dehydrogenase 1C	DrugBank
MOL000449	Stigmasterol	Ig gamma-1 chain C region	DrugBank
MOL000449	Stigmasterol	Retinoic acid receptor RXR-alpha	DrugBank
MOL000449	Stigmasterol	Nuclear receptor coactivator 1	DrugBank
MOL000449	Stigmasterol	Prostaglandin G/H synthase 1	DrugBank
MOL000449	Stigmasterol	Prostaglandin G/H synthase 2	DrugBank
MOL000449	Stigmasterol	Alpha-2A adrenergic receptor	DrugBank
MOL000449	Stigmasterol	Sodium-dependent noradrenaline transporter	DrugBank
MOL000449	Stigmasterol	Sodium-dependent dopamine transporter	DrugBank
MOL000449	Stigmasterol	Beta-2 adrenergic receptor	DrugBank
MOL000449	Stigmasterol	Aldose reductase	DrugBank
MOL000449	Stigmasterol	Urokinase-type plasminogen activator	DrugBank
MOL000449	Stigmasterol	Leukotriene A-4 hydrolase	DrugBank
MOL000449	Stigmasterol	Amine oxidase [flavin-containing] B	DrugBank
MOL000449	Stigmasterol	Amine oxidase [flavin-containing] A	DrugBank
MOL000449	Stigmasterol	mRNA of PKA Catalytic Subunit C-alpha	DrugBank
MOL000449	Stigmasterol	Chymotrypsinogen B	DrugBank
MOL000449	Stigmasterol	Muscarinic acetylcholine receptor M3	DrugBank
MOL000449	Stigmasterol	Muscarinic acetylcholine receptor M1	DrugBank
MOL000449	Stigmasterol	Beta-1 adrenergic receptor	DrugBank
MOL000449	Stigmasterol	Sodium channel protein type 5 subunit alpha	DrugBank
MOL000449	Stigmasterol	5-hydroxytryptamine 2A receptor	DrugBank
MOL000449	Stigmasterol	Alpha-1A adrenergic receptor	DrugBank
MOL000449	Stigmasterol	Gamma-aminobutyric-acid receptor alpha-3 subunit	DrugBank
MOL000449	Stigmasterol	Muscarinic acetylcholine receptor M2	DrugBank
MOL000449	Stigmasterol	Alpha-1B adrenergic receptor	DrugBank
MOL000449	Stigmasterol	Gamma-aminobutyric acid receptor subunit alpha-1	DrugBank
MOL000449	Stigmasterol	Neuronal acetylcholine receptor protein, alpha-7 chain	DrugBank
MOL000358	beta-sitosterol	Progesterone receptor	DrugBank
MOL000358	beta-sitosterol	Nuclear receptor coactivator 2	DrugBank
MOL000358	beta-sitosterol	Prostaglandin G/H synthase 1	DrugBank
MOL000358	beta-sitosterol	Prostaglandin G/H synthase 2	DrugBank
MOL000358	beta-sitosterol	Heat shock protein HSP 90	DrugBank
MOL000358	beta-sitosterol	Phosphatidylinositol-4,5-bisphosphate 3-kinase catalytic subunit, gamma isoform	DrugBank
MOL000358	beta-sitosterol	Potassium voltage-gated channel subfamily H member 2	DrugBank
MOL000358	beta-sitosterol	mRNA of PKA Catalytic Subunit C-alpha	DrugBank
MOL000358	beta-sitosterol	Dopamine D1 receptor	DrugBank
MOL000358	beta-sitosterol	Muscarinic acetylcholine receptor M3	DrugBank
MOL000358	beta-sitosterol	Muscarinic acetylcholine receptor M1	DrugBank
MOL000358	beta-sitosterol	Sodium channel protein type 5 subunit alpha	DrugBank
MOL000358	beta-sitosterol	Gamma-aminobutyric-acid receptor alpha-2 subunit	DrugBank
MOL000358	beta-sitosterol	Muscarinic acetylcholine receptor M4	DrugBank
MOL000358	beta-sitosterol	CGMP-inhibited 3',5'-cyclic phosphodiesterase A	DrugBank
MOL000358	beta-sitosterol	5-hydroxytryptamine 2A receptor	DrugBank
MOL000358	beta-sitosterol	Gamma-aminobutyric-acid receptor alpha-5 subunit	DrugBank
MOL000358	beta-sitosterol	Alpha-1A adrenergic receptor	DrugBank
MOL000358	beta-sitosterol	Gamma-aminobutyric-acid receptor alpha-3 subunit	DrugBank
MOL000358	beta-sitosterol	Muscarinic acetylcholine receptor M2	DrugBank
MOL000358	beta-sitosterol	Alpha-1B adrenergic receptor	DrugBank
MOL000358	beta-sitosterol	Beta-2 adrenergic receptor	DrugBank
MOL000358	beta-sitosterol	Neuronal acetylcholine receptor subunit alpha-2	DrugBank
MOL000358	beta-sitosterol	Sodium-dependent serotonin transporter	DrugBank
MOL000358	beta-sitosterol	Mu-type opioid receptor	DrugBank
MOL000358	beta-sitosterol	Gamma-aminobutyric acid receptor subunit alpha-1	DrugBank
MOL000358	beta-sitosterol	Neuronal acetylcholine receptor protein, alpha-7 chain	DrugBank
MOL000358	beta-sitosterol	Cytochrome P450-cam	DrugBank
MOL000358	beta-sitosterol	Apoptosis regulator Bcl-2	DrugBank
MOL000358	beta-sitosterol	Apoptosis regulator BAX	N/A
MOL000358	beta-sitosterol	Caspase-9	N/A
MOL000358	beta-sitosterol	Transcription factor AP-1	DrugBank
MOL000358	beta-sitosterol	Caspase-3	N/A
MOL000358	beta-sitosterol	Caspase-8	N/A
MOL000358	beta-sitosterol	Protein kinase C alpha type	N/A
MOL000358	beta-sitosterol	Transforming growth factor beta-1	N/A
MOL000358	beta-sitosterol	Serum paraoxonase/arylesterase 1	DrugBank
MOL000358	beta-sitosterol	Microtubule-associated protein 2	DrugBank
MOL003648	Inermin	Prostaglandin G/H synthase 1	DrugBank
MOL003648	Inermin	Muscarinic acetylcholine receptor M3	DrugBank
MOL003648	Inermin	Sodium channel protein type 5 subunit alpha	DrugBank
MOL003648	Inermin	Prostaglandin G/H synthase 2	DrugBank
MOL003648	Inermin	5-hydroxytryptamine receptor 3A	DrugBank
MOL003648	Inermin	Retinoic acid receptor RXR-alpha	DrugBank
MOL003648	Inermin	Alpha-1B adrenergic receptor	DrugBank
MOL003648	Inermin	Beta-2 adrenergic receptor	DrugBank
MOL003648	Inermin	Alpha-1D adrenergic receptor	DrugBank
MOL003648	Inermin	Sodium-dependent serotonin transporter	DrugBank
MOL003648	Inermin	Heat shock protein HSP 90	DrugBank
MOL003648	Inermin	Phosphatidylinositol-4,5-bisphosphate 3-kinase catalytic subunit, gamma isoform	DrugBank
MOL003648	Inermin	Neuronal acetylcholine receptor protein, alpha-7 chain	DrugBank
MOL003648	Inermin	mRNA of PKA Catalytic Subunit C-alpha	DrugBank
MOL003648	Inermin	Ig gamma-1 chain C region	DrugBank
MOL003648	Inermin	Trypsin-1	DrugBank
MOL003648	Inermin	Nuclear receptor coactivator 1	DrugBank
MOL003648	Inermin	Calmodulin	DrugBank
MOL000422	kaempferol	Nitric oxide synthase, inducible	DrugBank
MOL000422	kaempferol	Prostaglandin G/H synthase 1	DrugBank
MOL000422	kaempferol	Androgen receptor	DrugBank
MOL000422	kaempferol	Peroxisome proliferator activated receptor gamma	DrugBank
MOL000422	kaempferol	Prostaglandin G/H synthase 2	DrugBank
MOL000422	kaempferol	Heat shock protein HSP 90	DrugBank
MOL000422	kaempferol	Phosphatidylinositol-4,5-bisphosphate 3-kinase catalytic subunit, gamma isoform	DrugBank
MOL000422	kaempferol	mRNA of PKA Catalytic Subunit C-alpha	DrugBank
MOL000422	kaempferol	Nuclear receptor coactivator 2	DrugBank
MOL000422	kaempferol	Dipeptidyl peptidase IV	DrugBank
MOL000422	kaempferol	Trypsin-1	DrugBank
MOL000422	kaempferol	Progesterone receptor	DrugBank
MOL000422	kaempferol	Thrombin	DrugBank
MOL000422	kaempferol	Muscarinic acetylcholine receptor M1	DrugBank
MOL000422	kaempferol	Nitric-oxide synthase, endothelial	DrugBank
MOL000422	kaempferol	Gamma-aminobutyric-acid receptor alpha-2 subunit	DrugBank
MOL000422	kaempferol	Acetylcholinesterase	DrugBank
MOL000422	kaempferol	Sodium-dependent noradrenaline transporter	DrugBank
MOL000422	kaempferol	Muscarinic acetylcholine receptor M2	DrugBank
MOL000422	kaempferol	Alpha-1B adrenergic receptor	DrugBank
MOL000422	kaempferol	Gamma-aminobutyric acid receptor subunit alpha-1	DrugBank
MOL000422	kaempferol	DNA topoisomerase II	DrugBank
MOL000422	kaempferol	Coagulation factor VII	DrugBank
MOL000422	kaempferol	Calmodulin	DrugBank
MOL000422	kaempferol	Transcription factor p65	N/A
MOL000422	kaempferol	Inhibitor of nuclear factor kappa-B kinase subunit beta	N/A
MOL000422	kaempferol	RAC-alpha serine/threonine-protein kinase	N/A
MOL000422	kaempferol	Apoptosis regulator Bcl-2	DrugBank
MOL000422	kaempferol	Apoptosis regulator BAX	N/A
MOL000422	kaempferol	Tumor necrosis factor	DrugBank
MOL000422	kaempferol	Transcription factor AP-1	DrugBank
MOL000422	kaempferol	Activator of 90 kDa heat shock protein ATPase homolog 1	N/A
MOL000422	kaempferol	Caspase-3	N/A
MOL000422	kaempferol	Mitogen-activated protein kinase 8	DrugBank
MOL000422	kaempferol	Xanthine dehydrogenase/oxidase	DrugBank
MOL000422	kaempferol	Interstitial collagenase	DrugBank
MOL000422	kaempferol	Signal transducer and activator of transcription 1-alpha/beta	N/A
MOL000422	kaempferol	Cell division control protein 2 homolog	DrugBank
MOL000422	kaempferol	Peroxisome proliferator-activated receptor gamma	N/A
MOL000422	kaempferol	Heme oxygenase 1	DrugBank
MOL000422	kaempferol	Cytochrome P450 3A4	DrugBank
MOL000422	kaempferol	Cytochrome P450 1A2	DrugBank
MOL000422	kaempferol	Cytochrome P450 1A1	N/A
MOL000422	kaempferol	Intercellular adhesion molecule 1	N/A
MOL000422	kaempferol	E-selectin	DrugBank
MOL000422	kaempferol	Vascular cell adhesion protein 1	DrugBank
MOL000422	kaempferol	Nuclear receptor subfamily 1 group I member 2	N/A
MOL000422	kaempferol	Cytochrome P450 1B1	N/A
MOL000422	kaempferol	Arachidonate 5-lipoxygenase	DrugBank
MOL000422	kaempferol	Hyaluronan synthase 2	N/A
MOL000422	kaempferol	Glutathione S-transferase P	DrugBank
MOL000422	kaempferol	Aryl hydrocarbon receptor	DrugBank
MOL000422	kaempferol	26S proteasome non-ATPase regulatory subunit 3	N/A
MOL000422	kaempferol	Solute carrier family 2, facilitated glucose transporter member 4	N/A
MOL000422	kaempferol	Nuclear receptor subfamily 1 group I member 3	N/A
MOL000422	kaempferol	Insulin receptor	DrugBank
MOL000422	kaempferol	Type I iodothyronine deiodinase	N/A
MOL000422	kaempferol	Serine/threonine-protein phosphatase 2B catalytic subunit alpha isoform	DrugBank
MOL000422	kaempferol	Peroxidase C1A	N/A
MOL000422	kaempferol	Glutathione S-transferase Mu 1	DrugBank
MOL000422	kaempferol	Glutathione S-transferase Mu 2	DrugBank
MOL000422	kaempferol	Aldo-keto reductase family 1 member C3	DrugBank
MOL000422	kaempferol	Antileukoproteinase	N/A
MOL005308	Aposiopolamine	Muscarinic acetylcholine receptor M3	DrugBank
MOL005308	Aposiopolamine	Muscarinic acetylcholine receptor M1	DrugBank
MOL005308	Aposiopolamine	Sodium-dependent noradrenaline transporter	DrugBank
MOL005308	Aposiopolamine	Sodium-dependent dopamine transporter	DrugBank
MOL005308	Aposiopolamine	Beta-2 adrenergic receptor	DrugBank
MOL005308	Aposiopolamine	Sodium-dependent serotonin transporter	DrugBank
MOL005308	Aposiopolamine	Gamma-aminobutyric acid receptor subunit alpha-1	DrugBank
MOL005308	Aposiopolamine	Dipeptidyl peptidase IV	DrugBank
MOL005317	Deoxyharringtonine	Androgen receptor	DrugBank
MOL005317	Deoxyharringtonine	Mineralocorticoid receptor	DrugBank
MOL005318	Dianthramine	Prostaglandin G/H synthase 1	DrugBank
MOL005318	Dianthramine	Prostaglandin G/H synthase 2	DrugBank
MOL005318	Dianthramine	Heat shock protein HSP 90	DrugBank
MOL005320	arachidonate	Prostaglandin G/H synthase 1	DrugBank
MOL005320	arachidonate	Prostaglandin G/H synthase 2	DrugBank
MOL005320	arachidonate	Retinoic acid receptor RXR-gamma	DrugBank
MOL005320	arachidonate	Nuclear receptor coactivator 2	DrugBank
MOL005321	Frutinone A	Prostaglandin G/H synthase 1	DrugBank
MOL005321	Frutinone A	Thrombin	DrugBank
MOL005321	Frutinone A	Androgen receptor	DrugBank
MOL005321	Frutinone A	Sodium channel protein type 5 subunit alpha	DrugBank
MOL005321	Frutinone A	Peroxisome proliferator activated receptor gamma	DrugBank
MOL005321	Frutinone A	Prostaglandin G/H synthase 2	DrugBank
MOL005321	Frutinone A	Retinoic acid receptor RXR-alpha	DrugBank
MOL005321	Frutinone A	CGMP-inhibited 3',5'-cyclic phosphodiesterase A	DrugBank
MOL005321	Frutinone A	Beta-2 adrenergic receptor	DrugBank
MOL005321	Frutinone A	Gamma-aminobutyric acid receptor subunit alpha-1	DrugBank
MOL005321	Frutinone A	Dipeptidyl peptidase IV	DrugBank
MOL005321	Frutinone A	Heat shock protein HSP 90	DrugBank
MOL005321	Frutinone A	Phosphatidylinositol-4,5-bisphosphate 3-kinase catalytic subunit, gamma isoform	DrugBank
MOL005321	Frutinone A	Neuronal acetylcholine receptor protein, alpha-7 chain	DrugBank
MOL005321	Frutinone A	mRNA of PKA Catalytic Subunit C-alpha	DrugBank
MOL005321	Frutinone A	Acetylcholinesterase	DrugBank
MOL005344	ginsenoside rh2	Apoptosis regulator BAX	N/A
MOL005344	ginsenoside rh2	Tumor necrosis factor	DrugBank
MOL005344	ginsenoside rh2	Caspase-3	N/A
MOL005344	ginsenoside rh2	Prostaglandin G/H synthase 2	DrugBank
MOL005344	ginsenoside rh2	NF-kappa-B inhibitor alpha	N/A
MOL005344	ginsenoside rh2	Interleukin-1 beta	DrugBank
MOL005344	ginsenoside rh2	Caspase-1	N/A
MOL005344	ginsenoside rh2	Interferon gamma	DrugBank
MOL005344	ginsenoside rh2	Pituitary adenylate cyclase-activating polypeptide	DrugBank
MOL005344	ginsenoside rh2	Proteasome assembly chaperone 1	N/A
MOL005344	ginsenoside rh2	Dual specificity mitogen-activated protein kinase kinase 4	N/A
MOL005344	ginsenoside rh2	Solute carrier family 2, facilitated glucose transporter member 4	N/A
MOL005348	Ginsenoside-Rh4_qt	Mineralocorticoid receptor	DrugBank
MOL005348	Ginsenoside-Rh4_qt	Nuclear receptor coactivator 2	DrugBank
MOL005356	Girinimbin	Prostaglandin G/H synthase 1	DrugBank
MOL005356	Girinimbin	Sodium channel protein type 5 subunit alpha	DrugBank
MOL005356	Girinimbin	Prostaglandin G/H synthase 2	DrugBank
MOL005356	Girinimbin	Retinoic acid receptor RXR-alpha	DrugBank
MOL005356	Girinimbin	Beta-2 adrenergic receptor	DrugBank
MOL005356	Girinimbin	Gamma-aminobutyric acid receptor subunit alpha-1	DrugBank
MOL005356	Girinimbin	Phosphatidylinositol-4,5-bisphosphate 3-kinase catalytic subunit, gamma isoform	DrugBank
MOL005356	Girinimbin	Neuronal acetylcholine receptor protein, alpha-7 chain	DrugBank
MOL005356	Girinimbin	mRNA of PKA Catalytic Subunit C-alpha	DrugBank
MOL005356	Girinimbin	Nuclear receptor coactivator 2	DrugBank
MOL005376	Panaxadiol	Glucocorticoid receptor	DrugBank
MOL005384	suchilactone	Potassium voltage-gated channel subfamily H member 2	DrugBank
MOL005384	suchilactone	Sodium channel protein type 5 subunit alpha	DrugBank
MOL005384	suchilactone	Coagulation factor Xa	DrugBank
MOL005384	suchilactone	Prostaglandin G/H synthase 2	DrugBank
MOL005384	suchilactone	Coagulation factor VII	DrugBank
MOL005384	suchilactone	mRNA of Protein-tyrosine phosphatase, non-receptor type 1	DrugBank
MOL005384	suchilactone	Beta-2 adrenergic receptor	DrugBank
MOL005384	suchilactone	Heat shock protein HSP 90	DrugBank
MOL005384	suchilactone	Nuclear receptor coactivator 1	DrugBank
MOL005384	suchilactone	Calcium-activated potassium channel subunit alpha 1	DrugBank
MOL005384	suchilactone	Calmodulin	DrugBank
MOL005384	suchilactone	Prostaglandin G/H synthase 1	DrugBank
MOL005384	suchilactone	Retinoic acid receptor RXR-alpha	DrugBank
MOL005384	suchilactone	CGMP-inhibited 3',5'-cyclic phosphodiesterase A	DrugBank
MOL005384	suchilactone	Alpha-1D adrenergic receptor	DrugBank
MOL005384	suchilactone	mRNA of PKA Catalytic Subunit C-alpha	DrugBank
MOL005399	alexandrin_qt	Progesterone receptor	DrugBank
MOL000787	Fumarine	Prostaglandin G/H synthase 1	DrugBank
MOL000787	Fumarine	Muscarinic acetylcholine receptor M3	DrugBank
MOL000787	Fumarine	Potassium voltage-gated channel subfamily H member 2	DrugBank
MOL000787	Fumarine	Muscarinic acetylcholine receptor M1	DrugBank
MOL000787	Fumarine	Sodium channel protein type 5 subunit alpha	DrugBank
MOL000787	Fumarine	Coagulation factor Xa	DrugBank
MOL000787	Fumarine	Muscarinic acetylcholine receptor M5	DrugBank
MOL000787	Fumarine	Prostaglandin G/H synthase 2	DrugBank
MOL000787	Fumarine	5-hydroxytryptamine receptor 3A	DrugBank
MOL000787	Fumarine	Coagulation factor VII	DrugBank
MOL000787	Fumarine	Muscarinic acetylcholine receptor M4	DrugBank
MOL000787	Fumarine	Delta-type opioid receptor	DrugBank
MOL000787	Fumarine	5-hydroxytryptamine 2A receptor	DrugBank
MOL000787	Fumarine	Alpha-1B adrenergic receptor	DrugBank
MOL000787	Fumarine	Beta-2 adrenergic receptor	DrugBank
MOL000787	Fumarine	Alpha-1D adrenergic receptor	DrugBank
MOL000787	Fumarine	Mu-type opioid receptor	DrugBank
MOL000787	Fumarine	Heat shock protein HSP 90	DrugBank
MOL000787	Fumarine	mRNA of PKA Catalytic Subunit C-alpha	DrugBank
MOL000787	Fumarine	Calmodulin	DrugBank
MOL000787	Fumarine	Sodium-dependent serotonin transporter	DrugBank
MOL000787	Fumarine	Voltage-dependent L-type calcium channel subunit alpha-1S	DrugBank
MOL000787	Fumarine	CGMP-inhibited 3',5'-cyclic phosphodiesterase A	DrugBank
MOL000787	Fumarine	Sodium-dependent dopamine transporter	DrugBank
MOL000787	Fumarine	Type IV phosphodiesterase	DrugBank
MOL000787	Fumarine	DNA topoisomerase II	DrugBank
MOL000787	Fumarine	Dopamine D1 receptor	DrugBank
MOL000787	Fumarine	Vascular endothelial growth factor receptor 2	DrugBank
