# Supplementary material for: Integrating Network Pharmacology and Pharmacological Validation for Deciphering the Mechanism of Qishen Yixin Granules in Suppressing myocardial fibrosis
Source: Research Square preprint supplement (doi:10.21203/rs.3.rs-1526523/v1), 2022-04-08
Supplement: Supplementary file 3 [file 73e6e8093a12dcb36ae27c6f.xlsx]

## Sheet: BP
ID	Description	GeneRatio	BgRatio	pvalue	p.adjust	qvalue	geneID	Count
GO:0032496	response to lipopolysaccharide	19/59	330/18670	2.20025e-19	3.68177e-16	1.57313e-16	PTGS2/CASP3/MAPK14/NOS2/AKT1/FOS/MPO/MAPK8/ICAM1/SELE/VCAM1/IL6/IL1B/CCL2/NOS3/THBD/SERPINE1/CXCL10/CASP1	19
GO:0070482	response to oxygen levels	20/59	394/18670	2.5012e-19	3.68177e-16	1.57313e-16	PTGS2/SLC6A4/CASP3/PPARG/NOS2/DPP4/AKT1/VEGFA/HIF1A/CAT/F7/HMOX1/ICAM1/VCAM1/MMP2/RAF1/CAV1/PLAT/COL1A1/PPARA	20
GO:0002237	response to molecule of bacterial origin	19/59	343/18670	4.55478e-19	4.46976e-16	1.90981e-16	PTGS2/CASP3/MAPK14/NOS2/AKT1/FOS/MPO/MAPK8/ICAM1/SELE/VCAM1/IL6/IL1B/CCL2/NOS3/THBD/SERPINE1/CXCL10/CASP1	19
GO:0031667	response to nutrient levels	21/59	499/18670	1.23602e-18	9.09707e-16	3.88694e-16	PTGS2/ADRB2/SLC6A4/PON1/ADRB1/PPARG/AKT1/MPO/SOD1/CAT/F7/MAPK8/STAT1/HMOX1/ICAM1/VCAM1/IL1B/COL1A1/PPARA/CXCL10/SPP1	21
GO:0001666	response to hypoxia	18/59	359/18670	2.67077e-17	1.57255e-14	6.71909e-15	PTGS2/SLC6A4/CASP3/NOS2/DPP4/AKT1/VEGFA/HIF1A/CAT/F7/HMOX1/ICAM1/VCAM1/MMP2/RAF1/CAV1/PLAT/PPARA	18
GO:0036293	response to decreased oxygen levels	18/59	370/18670	4.55131e-17	2.23318e-14	9.54178e-15	PTGS2/SLC6A4/CASP3/NOS2/DPP4/AKT1/VEGFA/HIF1A/CAT/F7/HMOX1/ICAM1/VCAM1/MMP2/RAF1/CAV1/PLAT/PPARA	18
GO:0006979	response to oxidative stress	19/59	451/18670	7.47211e-17	3.14256e-14	1.34273e-14	PTGS1/PTGS2/CASP3/AKT1/FOS/MMP9/HIF1A/MPO/CYCS/SOD1/CAT/MAPK8/STAT1/HMOX1/MMP3/MMP2/IL6/NOS3/COL1A1	19
GO:0000302	response to reactive oxygen species	15/59	232/18670	4.05675e-16	1.49288e-13	6.3787e-14	CASP3/AKT1/FOS/MMP9/MPO/SOD1/CAT/MAPK8/STAT1/HMOX1/MMP3/MMP2/IL6/NOS3/COL1A1	15
GO:0009612	response to mechanical stimulus	14/59	210/18670	2.85764e-15	9.34766e-13	3.99401e-13	PTGS2/PPARG/MAPK14/AKT1/FOS/MPO/MAPK8/STAT1/RAF1/IL1B/COL1A1/COL3A1/CXCL10/CASP1	14
GO:0050900	leukocyte migration	18/59	499/18670	8.41489e-15	2.47734e-12	1.05851e-12	MAPK14/AKT1/VEGFA/F7/OLR1/MMP1/HMOX1/ICAM1/SELE/VCAM1/IL6/CAV1/IL1B/CCL2/THBD/SERPINE1/COL1A1/CXCL10	18
GO:0007584	response to nutrient	13/59	219/18670	1.4006e-13	3.74851e-11	1.60164e-11	PTGS2/SLC6A4/PPARG/SOD1/CAT/F7/STAT1/HMOX1/VCAM1/IL1B/COL1A1/CXCL10/SPP1	13
GO:0072593	reactive oxygen species metabolic process	14/59	284/18670	1.85879e-13	4.56023e-11	1.94847e-11	PTGS2/MAPK14/NOS2/AKT1/HIF1A/MPO/SOD1/CAT/ICAM1/MMP3/CAV1/IL1B/NOS3/CRP	14
GO:0003018	vascular process in circulatory system	12/59	173/18670	2.09244e-13	4.73857e-11	2.02467e-11	PTGS2/ADRB2/SLC6A4/ADRB1/AKT1/VEGFA/SOD1/HMOX1/ICAM1/CAV1/NOS3/CRP	12
GO:0010038	response to metal ion	15/59	364/18670	3.07457e-13	6.46539e-11	2.76249e-11	PTGS2/SCN5A/CASP3/AKT1/FOS/MMP9/HIF1A/SOD1/CAT/MAPK8/HMOX1/ICAM1/VCAM1/CAV1/IL1A	15
GO:0034599	cellular response to oxidative stress	14/59	302/18670	4.30143e-13	8.44227e-11	3.60716e-11	AKT1/FOS/MMP9/HIF1A/MPO/CYCS/SOD1/CAT/MAPK8/HMOX1/MMP3/MMP2/IL6/NOS3	14
GO:0035296	regulation of tube diameter	11/59	143/18670	7.36942e-13	1.20531e-10	5.14997e-11	PTGS2/ADRB2/SLC6A4/ADRB1/AKT1/SOD1/HMOX1/ICAM1/CAV1/NOS3/CRP	11
GO:0050880	regulation of blood vessel size	11/59	143/18670	7.36942e-13	1.20531e-10	5.14997e-11	PTGS2/ADRB2/SLC6A4/ADRB1/AKT1/SOD1/HMOX1/ICAM1/CAV1/NOS3/CRP	11
GO:0097746	regulation of blood vessel diameter	11/59	143/18670	7.36942e-13	1.20531e-10	5.14997e-11	PTGS2/ADRB2/SLC6A4/ADRB1/AKT1/SOD1/HMOX1/ICAM1/CAV1/NOS3/CRP	11
GO:0035150	regulation of tube size	11/59	144/18670	7.96002e-13	1.23338e-10	5.26993e-11	PTGS2/ADRB2/SLC6A4/ADRB1/AKT1/SOD1/HMOX1/ICAM1/CAV1/NOS3/CRP	11
GO:0022407	regulation of cell-cell adhesion	15/59	403/18670	1.33416e-12	1.96388e-10	8.39115e-11	CASP3/MAPK14/DPP4/AKT1/VEGFA/IL4/ICAM1/VCAM1/IL6/CAV1/IL1B/CCL2/IL2/PPARA/CD40LG	15
GO:0071222	cellular response to lipopolysaccharide	12/59	205/18670	1.58329e-12	2.21962e-10	9.48387e-11	MAPK14/NOS2/AKT1/MAPK8/ICAM1/IL6/IL1B/CCL2/NOS3/SERPINE1/CXCL10/CASP1	12
GO:0007159	leukocyte cell-cell adhesion	14/59	337/18670	1.9039e-12	2.54776e-10	1.08859e-10	CASP3/DPP4/AKT1/IL4/ICAM1/SELE/VCAM1/IL6/CAV1/IL1B/CCL2/IL2/PPARA/CD40LG	14
GO:0071219	cellular response to molecule of bacterial origin	12/59	212/18670	2.3562e-12	2.96365e-10	1.26629e-10	MAPK14/NOS2/AKT1/MAPK8/ICAM1/IL6/IL1B/CCL2/NOS3/SERPINE1/CXCL10/CASP1	12
GO:0001101	response to acid chemical	14/59	343/18670	2.41602e-12	2.96365e-10	1.26629e-10	PTGS2/SLC6A4/CASP3/PON1/PPARG/AKT1/VEGFA/CAT/F7/KDR/ICAM1/MMP2/COL1A1/COL3A1	14
GO:0071216	cellular response to biotic stimulus	12/59	236/18670	8.33526e-12	9.8156e-10	4.19395e-10	MAPK14/NOS2/AKT1/MAPK8/ICAM1/IL6/IL1B/CCL2/NOS3/SERPINE1/CXCL10/CASP1	12
GO:1903037	regulation of leukocyte cell-cell adhesion	13/59	304/18670	9.0616e-12	1.02605e-09	4.38405e-10	CASP3/DPP4/AKT1/IL4/ICAM1/VCAM1/IL6/CAV1/IL1B/CCL2/IL2/PPARA/CD40LG	13
GO:0045765	regulation of angiogenesis	14/59	383/18670	1.06269e-11	1.15873e-09	4.95093e-10	PTGS2/PPARG/VEGFA/HIF1A/KDR/STAT1/HMOX1/IL6/F3/IL1B/NOS3/SERPINE1/IL1A/CXCL10	14
GO:0050727	regulation of inflammatory response	15/59	485/18670	1.86669e-11	1.96269e-09	8.38606e-10	PTGS2/ESR1/PPARG/MAPK14/NOS2/MMP9/SOD1/IL4/SELE/MMP3/IL6/IL1B/IL2/SERPINE1/PPARA	15
GO:2001233	regulation of apoptotic signaling pathway	14/59	406/18670	2.31268e-11	2.34776e-09	1.00314e-09	PTGS2/AKT1/MMP9/HIF1A/SOD1/MAPK8/HMOX1/ICAM1/RAF1/CAV1/IL1B/NOS3/SERPINE1/IL1A	14
GO:0043062	extracellular structure organization	14/59	422/18670	3.86354e-11	3.66912e-09	1.56772e-09	DPP4/MMP9/MPO/KDR/MMP1/ICAM1/VCAM1/MMP3/MMP2/IL6/SERPINE1/COL1A1/COL3A1/SPP1	14
GO:1901342	regulation of vasculature development	14/59	422/18670	3.86354e-11	3.66912e-09	1.56772e-09	PTGS2/PPARG/VEGFA/HIF1A/KDR/STAT1/HMOX1/IL6/F3/IL1B/NOS3/SERPINE1/IL1A/CXCL10	14
GO:0062013	positive regulation of small molecule metabolic process	10/59	153/18670	4.52349e-11	4.16161e-09	1.77815e-09	PTGS2/PPARG/NOS2/AKT1/HIF1A/IL4/EGF/IL1B/NOS3/PPARA	10
GO:0051090	regulation of DNA-binding transcription factor activity	14/59	432/18670	5.26803e-11	4.69972e-09	2.00807e-09	ESR1/PPARG/MAPK14/AKT1/VEGFA/FOS/CAT/MAPK8/HMOX1/ICAM1/IL6/CAV1/IL1B/CD40LG	14
GO:1903039	positive regulation of leukocyte cell-cell adhesion	11/59	218/18670	7.3172e-11	6.33583e-09	2.70714e-09	DPP4/AKT1/IL4/ICAM1/VCAM1/IL6/CAV1/IL1B/CCL2/IL2/CD40LG	11
GO:0044706	multi-multicellular organism process	11/59	222/18670	8.8944e-11	7.48146e-09	3.19663e-09	PTGS2/SLC6A4/ESR1/AKT1/FOS/MMP9/SOD1/MMP2/IL1B/THBD/SPP1	11
GO:0097191	extrinsic apoptotic signaling pathway	11/59	224/18670	9.7924e-11	7.79822e-09	3.33198e-09	CASP3/AKT1/HMOX1/ICAM1/RAF1/CAV1/IL1B/NOS3/IL2/SERPINE1/IL1A	11
GO:0030198	extracellular matrix organization	13/59	368/18670	9.80075e-11	7.79822e-09	3.33198e-09	DPP4/MMP9/KDR/MMP1/ICAM1/VCAM1/MMP3/MMP2/IL6/SERPINE1/COL1A1/COL3A1/SPP1	13
GO:0034614	cellular response to reactive oxygen species	10/59	168/18670	1.1426e-10	8.85211e-09	3.78228e-09	AKT1/FOS/MMP9/MPO/SOD1/MAPK8/MMP3/MMP2/IL6/NOS3	10
GO:2001234	negative regulation of apoptotic signaling pathway	11/59	230/18670	1.2997e-10	9.81106e-09	4.19201e-09	PTGS2/AKT1/MMP9/HIF1A/HMOX1/ICAM1/RAF1/IL1B/NOS3/SERPINE1/IL1A	11
GO:0001819	positive regulation of cytokine production	14/59	464/18670	1.35114e-10	9.94438e-09	4.24897e-09	PTGS2/MAPK14/HIF1A/SOD1/IL4/STAT1/HMOX1/IL6/IL1B/IL2/SERPINE1/IL1A/CD40LG/CASP1	14
GO:1903409	reactive oxygen species biosynthetic process	9/59	122/18670	1.53845e-10	1.10468e-08	4.72001e-09	PTGS2/NOS2/AKT1/MPO/SOD1/ICAM1/CAV1/IL1B/NOS3	9
GO:0001936	regulation of endothelial cell proliferation	10/59	176/18670	1.80749e-10	1.26696e-08	5.4134e-09	PPARG/AKT1/VEGFA/HIF1A/KDR/STAT1/HMOX1/CAV1/F3/CCL2	10
GO:0034612	response to tumor necrosis factor	12/59	312/18670	2.13175e-10	1.45951e-08	6.23609e-09	PTGS2/CASP3/MAPK14/AKT1/STAT1/ICAM1/SELE/VCAM1/CCL2/COL1A1/CD40LG/CASP1	12
GO:0050863	regulation of T cell activation	12/59	314/18670	2.294e-10	1.52943e-08	6.53487e-09	CASP3/DPP4/AKT1/SOD1/IL4/VCAM1/IL6/CAV1/IL1B/CCL2/IL2/CD40LG	12
GO:0009266	response to temperature stimulus	11/59	243/18670	2.33779e-10	1.52943e-08	6.53487e-09	PTGS2/ADRB2/ADRB1/PPARG/AKT1/FOS/SOD1/HMOX1/NOS3/IL1A/CXCL10	11
GO:0008217	regulation of blood pressure	10/59	182/18670	2.51304e-10	1.60835e-08	6.87205e-09	PTGS1/PTGS2/ADRB2/ADRB1/PPARG/NOS2/SOD1/HMOX1/NOS3/PPARA	10
GO:0048872	homeostasis of number of cells	11/59	246/18670	2.66414e-10	1.66877e-08	7.13024e-09	CASP3/MAPK14/AKT1/VEGFA/HIF1A/SOD1/STAT1/HMOX1/IL6/NOS3/IL2	11
GO:0045785	positive regulation of cell adhesion	13/59	403/18670	2.99946e-10	1.83967e-08	7.86043e-09	DPP4/AKT1/VEGFA/KDR/IL4/ICAM1/VCAM1/IL6/CAV1/IL1B/CCL2/IL2/CD40LG	13
GO:0032103	positive regulation of response to external stimulus	12/59	323/18670	3.17159e-10	1.88947e-08	8.0732e-09	PTGS2/MAPK14/VEGFA/F7/KDR/IL6/F3/IL1B/IL2/THBD/SERPINE1/CXCL10	12
GO:1904035	regulation of epithelial cell apoptotic process	8/59	88/18670	3.20901e-10	1.88947e-08	8.0732e-09	KDR/IL4/HMOX1/ICAM1/IL6/CCL2/SERPINE1/CD40LG	8
GO:0022409	positive regulation of cell-cell adhesion	11/59	255/18670	3.90337e-10	2.25324e-08	9.62751e-09	DPP4/AKT1/IL4/ICAM1/VCAM1/IL6/CAV1/IL1B/CCL2/IL2/CD40LG	11
GO:0001935	endothelial cell proliferation	10/59	191/18670	4.03338e-10	2.28351e-08	9.75687e-09	PPARG/AKT1/VEGFA/HIF1A/KDR/STAT1/HMOX1/CAV1/F3/CCL2	10
GO:0007565	female pregnancy	10/59	192/18670	4.24479e-10	2.35786e-08	1.00745e-08	PTGS2/ESR1/AKT1/FOS/MMP9/SOD1/MMP2/IL1B/THBD/SPP1	10
GO:2000377	regulation of reactive oxygen species metabolic process	10/59	195/18670	4.93945e-10	2.66512e-08	1.13874e-08	PTGS2/MAPK14/AKT1/HIF1A/SOD1/ICAM1/MMP3/CAV1/IL1B/CRP	10
GO:0007596	blood coagulation	12/59	336/18670	4.979e-10	2.66512e-08	1.13874e-08	F7/IL6/RAF1/CAV1/F3/NOS3/PLAT/THBD/SERPINE1/COL1A1/COL3A1/CD40LG	12
GO:0002685	regulation of leukocyte migration	10/59	196/18670	5.19252e-10	2.72978e-08	1.16637e-08	MAPK14/AKT1/VEGFA/F7/HMOX1/ICAM1/IL6/CCL2/SERPINE1/CXCL10	10
GO:0071496	cellular response to external stimulus	12/59	339/18670	5.51026e-10	2.846e-08	1.21602e-08	PTGS2/PPARG/AKT1/FOS/SOD1/MAPK8/HMOX1/ICAM1/VCAM1/IL1B/COL1A1/CASP1	12
GO:0007599	hemostasis	12/59	341/18670	5.89237e-10	2.99089e-08	1.27793e-08	F7/IL6/RAF1/CAV1/F3/NOS3/PLAT/THBD/SERPINE1/COL1A1/COL3A1/CD40LG	12
GO:0050817	coagulation	12/59	342/18670	6.09227e-10	3.03994e-08	1.29889e-08	F7/IL6/RAF1/CAV1/F3/NOS3/PLAT/THBD/SERPINE1/COL1A1/COL3A1/CD40LG	12
GO:0050870	positive regulation of T cell activation	10/59	202/18670	6.96834e-10	3.41913e-08	1.46091e-08	DPP4/AKT1/IL4/VCAM1/IL6/CAV1/IL1B/CCL2/IL2/CD40LG	10
GO:0050673	epithelial cell proliferation	13/59	434/18670	7.41716e-10	3.57969e-08	1.52951e-08	SCN5A/ESR1/PPARG/AKT1/VEGFA/HIF1A/KDR/STAT1/HMOX1/CAV1/F3/CCL2/IGFBP3	13
GO:0045766	positive regulation of angiogenesis	10/59	204/18670	7.67024e-10	3.64213e-08	1.55619e-08	PTGS2/VEGFA/HIF1A/KDR/HMOX1/F3/IL1B/NOS3/SERPINE1/IL1A	10
GO:0014074	response to purine-containing compound	9/59	149/18670	9.2125e-10	4.30502e-08	1.83942e-08	PTGS2/SLC6A4/PPARG/FOS/SOD1/STAT1/IL1B/THBD/COL1A1	9
GO:0046686	response to cadmium ion	7/59	63/18670	1.05054e-09	4.83248e-08	2.06479e-08	AKT1/FOS/MMP9/SOD1/CAT/MAPK8/HMOX1	7
GO:0009314	response to radiation	13/59	448/18670	1.09096e-09	4.94122e-08	2.11126e-08	PTGS2/CASP3/MAPK14/AKT1/FOS/HIF1A/CAT/MAPK8/ICAM1/VCAM1/THBD/COL3A1/CXCL10	13
GO:0045807	positive regulation of endocytosis	9/59	153/18670	1.16565e-09	5.19949e-08	2.22161e-08	PPARG/VEGFA/SOD1/IL4/SELE/EGF/IL1B/CCL2/SERPINE1	9
GO:2001237	negative regulation of extrinsic apoptotic signaling pathway	8/59	104/18670	1.23679e-09	5.43449e-08	2.32201e-08	AKT1/HMOX1/ICAM1/RAF1/IL1B/NOS3/SERPINE1/IL1A	8
GO:2001236	regulation of extrinsic apoptotic signaling pathway	9/59	155/18670	1.30796e-09	5.66269e-08	2.41952e-08	AKT1/HMOX1/ICAM1/RAF1/CAV1/IL1B/NOS3/SERPINE1/IL1A	9
GO:0042136	neurotransmitter biosynthetic process	8/59	106/18670	1.44104e-09	6.07595e-08	2.5961e-08	PTGS2/SLC6A4/NOS2/AKT1/ICAM1/CAV1/IL1B/NOS3	8
GO:0062012	regulation of small molecule metabolic process	13/59	459/18670	1.46378e-09	6.07595e-08	2.5961e-08	PTGS2/PPARG/NOS2/AKT1/HIF1A/SOD1/IL4/EGF/CAV1/IL1B/NOS3/PPARA/IGFBP3	13
GO:1905952	regulation of lipid localization	9/59	157/18670	1.46533e-09	6.07595e-08	2.5961e-08	PON1/PPARG/AKT1/EGF/IL6/IL1B/PPARA/CRP/SPP1	9
GO:0031649	heat generation	5/59	17/18670	1.5929e-09	6.51319e-08	2.78292e-08	PTGS2/ADRB2/ADRB1/IL1B/IL1A	5
GO:0071276	cellular response to cadmium ion	6/59	37/18670	1.65256e-09	6.63892e-08	2.83664e-08	AKT1/FOS/MMP9/SOD1/MAPK8/HMOX1	6
GO:0042110	T cell activation	13/59	464/18670	1.66875e-09	6.63892e-08	2.83664e-08	CASP3/DPP4/AKT1/SOD1/IL4/ICAM1/VCAM1/IL6/CAV1/IL1B/CCL2/IL2/CD40LG	13
GO:1904019	epithelial cell apoptotic process	8/59	111/18670	2.08421e-09	8.18123e-08	3.49563e-08	KDR/IL4/HMOX1/ICAM1/IL6/CCL2/SERPINE1/CD40LG	8
GO:0048545	response to steroid hormone	12/59	385/18670	2.33102e-09	9.02962e-08	3.85812e-08	PTGS2/CASP3/NR3C2/ESR1/PPARG/FOS/ICAM1/IL6/CAV1/COL1A1/PPARA/SPP1	12
GO:1904018	positive regulation of vasculature development	10/59	230/18670	2.45356e-09	9.38089e-08	4.00821e-08	PTGS2/VEGFA/HIF1A/KDR/HMOX1/F3/IL1B/NOS3/SERPINE1/IL1A	10
GO:0032963	collagen metabolic process	8/59	115/18670	2.76501e-09	1.04361e-07	4.45909e-08	PPARG/MMP9/HIF1A/MMP1/MMP3/MMP2/IL6/COL1A1	8
GO:0048660	regulation of smooth muscle cell proliferation	9/59	169/18670	2.80878e-09	1.04671e-07	4.47234e-08	PTGS2/PPARG/AKT1/MMP9/STAT1/HMOX1/MMP2/IL6/IGFBP3	9
GO:0048659	smooth muscle cell proliferation	9/59	171/18670	3.11542e-09	1.14648e-07	4.89859e-08	PTGS2/PPARG/AKT1/MMP9/STAT1/HMOX1/MMP2/IL6/IGFBP3	9
GO:0150077	regulation of neuroinflammatory response	6/59	41/18670	3.16523e-09	1.15043e-07	4.91547e-08	PTGS2/MMP9/IL4/MMP3/IL6/IL1B	6
GO:0033002	muscle cell proliferation	10/59	239/18670	3.55128e-09	1.275e-07	5.44773e-08	PTGS2/PPARG/MAPK14/AKT1/MMP9/STAT1/HMOX1/MMP2/IL6/IGFBP3	10
GO:0006809	nitric oxide biosynthetic process	7/59	77/18670	4.41272e-09	1.56519e-07	6.68763e-08	PTGS2/NOS2/AKT1/ICAM1/CAV1/IL1B/NOS3	7
GO:0048771	tissue remodeling	9/59	179/18670	4.6562e-09	1.63189e-07	6.97264e-08	ADRB2/HIF1A/MMP2/IL6/CAV1/NOS3/IL2/IL1A/SPP1	9
GO:0030193	regulation of blood coagulation	7/59	79/18670	5.29317e-09	1.81199e-07	7.74215e-08	F7/CAV1/F3/NOS3/PLAT/THBD/SERPINE1	7
GO:0043536	positive regulation of blood vessel endothelial cell migration	7/59	79/18670	5.29317e-09	1.81199e-07	7.74215e-08	PTGS2/AKT1/VEGFA/HIF1A/KDR/HMOX1/NOS3	7
GO:1900046	regulation of hemostasis	7/59	80/18670	5.78658e-09	1.95813e-07	8.36656e-08	F7/CAV1/F3/NOS3/PLAT/THBD/SERPINE1	7
GO:0046209	nitric oxide metabolic process	7/59	82/18670	6.89138e-09	2.30548e-07	9.85072e-08	PTGS2/NOS2/AKT1/ICAM1/CAV1/IL1B/NOS3	7
GO:0050818	regulation of coagulation	7/59	84/18670	8.1703e-09	2.67171e-07	1.14155e-07	F7/CAV1/F3/NOS3/PLAT/THBD/SERPINE1	7
GO:0048608	reproductive structure development	12/59	431/18670	8.25443e-09	2.67171e-07	1.14155e-07	PTGS2/CASP3/ESR1/PPARG/MAPK14/AKT1/VEGFA/HIF1A/SOD1/ICAM1/NOS3/SPP1	12
GO:0051091	positive regulation of DNA-binding transcription factor activity	10/59	261/18670	8.25836e-09	2.67171e-07	1.14155e-07	ESR1/PPARG/AKT1/VEGFA/CAT/ICAM1/IL6/CAV1/IL1B/CD40LG	10
GO:2001057	reactive nitrogen species metabolic process	7/59	85/18670	8.88181e-09	2.82281e-07	1.20611e-07	PTGS2/NOS2/AKT1/ICAM1/CAV1/IL1B/NOS3	7
GO:0061458	reproductive system development	12/59	434/18670	8.91717e-09	2.82281e-07	1.20611e-07	PTGS2/CASP3/ESR1/PPARG/MAPK14/AKT1/VEGFA/HIF1A/SOD1/ICAM1/NOS3/SPP1	12
GO:0046683	response to organophosphorus	8/59	134/18670	9.29976e-09	2.9126e-07	1.24448e-07	PTGS2/SLC6A4/FOS/SOD1/STAT1/IL1B/THBD/COL1A1	8
GO:0050921	positive regulation of chemotaxis	8/59	135/18670	9.8615e-09	3.05603e-07	1.30576e-07	MAPK14/VEGFA/F7/KDR/IL6/F3/SERPINE1/CXCL10	8
GO:0010631	epithelial cell migration	11/59	351/18670	1.10857e-08	3.39963e-07	1.45257e-07	PTGS2/PPARG/DPP4/AKT1/VEGFA/MMP9/HIF1A/KDR/IL4/HMOX1/NOS3	11
GO:0090132	epithelium migration	11/59	354/18670	1.21032e-08	3.67339e-07	1.56954e-07	PTGS2/PPARG/DPP4/AKT1/VEGFA/MMP9/HIF1A/KDR/IL4/HMOX1/NOS3	11
GO:0007566	embryo implantation	6/59	51/18670	1.23726e-08	3.71683e-07	1.58811e-07	PTGS2/MMP9/SOD1/MMP2/IL1B/SPP1	6
GO:0052547	regulation of peptidase activity	12/59	452/18670	1.40028e-08	4.16405e-07	1.77919e-07	PTGS2/PPARG/MAPK14/AKT1/VEGFA/MMP9/CYCS/RAF1/CAV1/F3/SERPINE1/CASP1	12
GO:0090130	tissue migration	11/59	360/18670	1.4392e-08	4.23699e-07	1.81036e-07	PTGS2/PPARG/DPP4/AKT1/VEGFA/MMP9/HIF1A/KDR/IL4/HMOX1/NOS3	11
GO:0031331	positive regulation of cellular catabolic process	11/59	361/18670	1.48089e-08	4.31657e-07	1.84436e-07	ADRB2/AKT1/HIF1A/KDR/IL4/HMOX1/EGF/IL6/CAV1/IL1B/PPARA	11
GO:0032102	negative regulation of response to external stimulus	11/59	365/18670	1.65866e-08	4.73232e-07	2.022e-07	PPARG/SOD1/IL4/CCL2/NOS3/IL2/PLAT/THBD/SERPINE1/PPARA/SPP1	11
GO:0030100	regulation of endocytosis	10/59	281/18670	1.66762e-08	4.73232e-07	2.022e-07	PPARG/VEGFA/SOD1/IL4/SELE/EGF/CAV1/IL1B/CCL2/SERPINE1	10
GO:0033273	response to vitamin	7/59	93/18670	1.67174e-08	4.73232e-07	2.022e-07	PTGS2/PPARG/CAT/F7/COL1A1/CXCL10/SPP1	7
GO:1904645	response to amyloid-beta	6/59	54/18670	1.76142e-08	4.93868e-07	2.11017e-07	ADRB2/MMP9/ICAM1/VCAM1/MMP3/MMP2	6
GO:0002262	myeloid cell homeostasis	8/59	147/18670	1.92634e-08	5.35014e-07	2.28598e-07	CASP3/MAPK14/VEGFA/HIF1A/SOD1/STAT1/HMOX1/IL6	8
GO:0043281	regulation of cysteine-type endopeptidase activity involved in apoptotic process	9/59	215/18670	2.29854e-08	6.32421e-07	2.70217e-07	PTGS2/PPARG/AKT1/VEGFA/MMP9/CYCS/RAF1/F3/CASP1	9
GO:0010632	regulation of epithelial cell migration	10/59	291/18670	2.32246e-08	6.33084e-07	2.705e-07	PTGS2/PPARG/AKT1/VEGFA/MMP9/HIF1A/KDR/IL4/HMOX1/NOS3	10
GO:0050678	regulation of epithelial cell proliferation	11/59	378/18670	2.3755e-08	6.41604e-07	2.74141e-07	SCN5A/PPARG/AKT1/VEGFA/HIF1A/KDR/STAT1/HMOX1/CAV1/F3/CCL2	11
GO:0050920	regulation of chemotaxis	9/59	217/18670	2.49015e-08	6.6045e-07	2.82193e-07	MAPK14/VEGFA/F7/KDR/IL6/F3/CCL2/SERPINE1/CXCL10	9
GO:0071241	cellular response to inorganic substance	9/59	217/18670	2.49015e-08	6.6045e-07	2.82193e-07	PTGS2/SCN5A/AKT1/FOS/MMP9/SOD1/MAPK8/HMOX1/MMP3	9
GO:0042133	neurotransmitter metabolic process	8/59	153/18670	2.63469e-08	6.88403e-07	2.94137e-07	PTGS2/SLC6A4/NOS2/AKT1/ICAM1/CAV1/IL1B/NOS3	8
GO:0048511	rhythmic process	10/59	295/18670	2.64231e-08	6.88403e-07	2.94137e-07	SLC6A4/CASP3/ESR1/PPARG/NOS2/F7/MAPK8/NOS3/SERPINE1/PPARA	10
GO:0002526	acute inflammatory response	9/59	220/18670	2.80375e-08	7.24056e-07	3.0937e-07	PTGS2/PPARG/ICAM1/VCAM1/IL6/F3/IL1B/IL1A/CRP	9
GO:0010575	positive regulation of vascular endothelial growth factor production	5/59	29/18670	2.96972e-08	7.52238e-07	3.21412e-07	PTGS2/HIF1A/IL6/IL1B/IL1A	5
GO:0048661	positive regulation of smooth muscle cell proliferation	7/59	101/18670	2.97636e-08	7.52238e-07	3.21412e-07	PTGS2/AKT1/MMP9/STAT1/HMOX1/MMP2/IL6	7
GO:2000351	regulation of endothelial cell apoptotic process	6/59	59/18670	3.03572e-08	7.52238e-07	3.21412e-07	KDR/IL4/ICAM1/CCL2/SERPINE1/CD40LG	6
GO:0048871	multicellular organismal homeostasis	12/59	485/18670	3.04749e-08	7.52238e-07	3.21412e-07	PTGS2/ADRB2/ADRB1/VEGFA/SOD1/IL4/IL6/CAV1/IL1B/NOS3/IL1A/SPP1	12
GO:0051249	regulation of lymphocyte activation	12/59	485/18670	3.04749e-08	7.52238e-07	3.21412e-07	CASP3/DPP4/AKT1/SOD1/IL4/VCAM1/IL6/CAV1/IL1B/CCL2/IL2/CD40LG	12
GO:0043535	regulation of blood vessel endothelial cell migration	8/59	156/18670	3.06619e-08	7.52238e-07	3.21412e-07	PTGS2/PPARG/AKT1/VEGFA/HIF1A/KDR/HMOX1/NOS3	8
GO:2000379	positive regulation of reactive oxygen species metabolic process	7/59	102/18670	3.18788e-08	7.75628e-07	3.31406e-07	PTGS2/MAPK14/AKT1/SOD1/ICAM1/IL1B/CRP	7
GO:0060326	cell chemotaxis	10/59	304/18670	3.50821e-08	8.46571e-07	3.61718e-07	MAPK14/VEGFA/F7/KDR/VCAM1/IL6/IL1B/CCL2/SERPINE1/CXCL10	10
GO:1905953	negative regulation of lipid localization	6/59	61/18670	3.72281e-08	8.91053e-07	3.80724e-07	PPARG/AKT1/EGF/IL6/PPARA/CRP	6
GO:0001503	ossification	11/59	398/18670	4.02291e-08	9.55117e-07	4.08097e-07	PTGS2/ADRB2/MAPK14/AKT1/HIF1A/CAT/MMP2/IL6/COL1A1/SPP1/IGFBP3	11
GO:0010876	lipid localization	11/59	400/18670	4.23366e-08	9.97112e-07	4.2604e-07	PON1/PPARG/NOS2/AKT1/EGF/IL6/CAV1/IL1B/PPARA/CRP/SPP1	11
GO:0097305	response to alcohol	9/59	233/18670	4.59734e-08	1.07417e-06	4.58965e-07	PPARG/AKT1/FOS/SOD1/CAT/F7/ICAM1/VCAM1/IL2	9
GO:0072577	endothelial cell apoptotic process	6/59	65/18670	5.4843e-08	1.27132e-06	5.43202e-07	KDR/IL4/ICAM1/CCL2/SERPINE1/CD40LG	6
GO:2000116	regulation of cysteine-type endopeptidase activity	9/59	239/18670	5.71855e-08	1.31527e-06	5.61979e-07	PTGS2/PPARG/AKT1/VEGFA/MMP9/CYCS/RAF1/F3/CASP1	9
GO:0007568	aging	10/59	321/18670	5.84898e-08	1.33484e-06	5.70341e-07	PTGS2/MAPK14/AKT1/FOS/MPO/SOD1/CAT/ICAM1/VCAM1/SERPINE1	10
GO:0010634	positive regulation of epithelial cell migration	8/59	171/18670	6.2624e-08	1.40737e-06	6.01332e-07	PTGS2/AKT1/VEGFA/MMP9/HIF1A/KDR/HMOX1/NOS3	8
GO:0016241	regulation of macroautophagy	8/59	171/18670	6.2624e-08	1.40737e-06	6.01332e-07	ADRB2/CASP3/AKT1/HIF1A/KDR/IL4/MAPK8/HMOX1	8
GO:0001659	temperature homeostasis	8/59	173/18670	6.85282e-08	1.51546e-06	6.47517e-07	PTGS2/ADRB2/ADRB1/VEGFA/IL4/CAV1/IL1B/IL1A	8
GO:0010574	regulation of vascular endothelial growth factor production	5/59	34/18670	6.87496e-08	1.51546e-06	6.47517e-07	PTGS2/HIF1A/IL6/IL1B/IL1A	5
GO:0002688	regulation of leukocyte chemotaxis	7/59	114/18670	6.89782e-08	1.51546e-06	6.47517e-07	MAPK14/VEGFA/F7/IL6/CCL2/SERPINE1/CXCL10	7
GO:0046677	response to antibiotic	10/59	327/18670	6.95607e-08	1.51694e-06	6.48148e-07	CASP3/SOD1/CAT/STAT1/HMOX1/ICAM1/VCAM1/IL6/IL2/COL1A1	10
GO:0019915	lipid storage	6/59	68/18670	7.21442e-08	1.56171e-06	6.67278e-07	PPARG/IL6/CAV1/IL1B/PPARA/CRP	6
GO:0009896	positive regulation of catabolic process	11/59	423/18670	7.46827e-08	1.60486e-06	6.85715e-07	ADRB2/AKT1/HIF1A/KDR/IL4/HMOX1/EGF/IL6/CAV1/IL1B/PPARA	11
GO:0097237	cellular response to toxic substance	9/59	247/18670	7.58078e-08	1.61723e-06	6.91001e-07	PTGS1/PTGS2/MPO/SOD1/CAT/KDR/HMOX1/IL6/NOS3	9
GO:0032147	activation of protein kinase activity	10/59	333/18670	8.2441e-08	1.74609e-06	7.46058e-07	ADRB2/MAPK14/AKT1/VEGFA/SOD1/IL4/EGF/RAF1/IL1B/CD40LG	10
GO:0051251	positive regulation of lymphocyte activation	10/59	334/18670	8.47807e-08	1.78282e-06	7.61752e-07	DPP4/AKT1/IL4/VCAM1/IL6/CAV1/IL1B/CCL2/IL2/CD40LG	10
GO:1903034	regulation of response to wounding	8/59	179/18670	8.92062e-08	1.86258e-06	7.9583e-07	F7/CAV1/F3/NOS3/PLAT/THBD/SERPINE1/SPP1	8
GO:0010573	vascular endothelial growth factor production	5/59	36/18670	9.26963e-08	1.91726e-06	8.19197e-07	PTGS2/HIF1A/IL6/IL1B/IL1A	5
GO:0043534	blood vessel endothelial cell migration	8/59	180/18670	9.31279e-08	1.91726e-06	8.19197e-07	PTGS2/PPARG/AKT1/VEGFA/HIF1A/KDR/HMOX1/NOS3	8
GO:0043434	response to peptide hormone	11/59	436/18670	1.01399e-07	2.07304e-06	8.85757e-07	PTGS2/PPARG/AKT1/CAT/F7/STAT1/ICAM1/CAV1/IL1B/COL1A1/PPARA	11
GO:0150076	neuroinflammatory response	6/59	75/18670	1.30478e-07	2.64916e-06	1.13192e-06	PTGS2/MMP9/IL4/MMP3/IL6/IL1B	6
GO:1902042	negative regulation of extrinsic apoptotic signaling pathway via death domain receptors	5/59	39/18670	1.40549e-07	2.82886e-06	1.2087e-06	HMOX1/ICAM1/RAF1/NOS3/SERPINE1	5
GO:0071248	cellular response to metal ion	8/59	190/18670	1.41251e-07	2.82886e-06	1.2087e-06	PTGS2/SCN5A/AKT1/FOS/MMP9/SOD1/MAPK8/HMOX1	8
GO:0032368	regulation of lipid transport	7/59	127/18670	1.45113e-07	2.88658e-06	1.23336e-06	PON1/PPARG/AKT1/EGF/IL1B/PPARA/SPP1	7
GO:0031668	cellular response to extracellular stimulus	9/59	268/18670	1.51908e-07	2.9856e-06	1.27567e-06	PTGS2/PPARG/FOS/SOD1/MAPK8/HMOX1/ICAM1/VCAM1/COL1A1	9
GO:0002687	positive regulation of leukocyte migration	7/59	128/18670	1.53134e-07	2.9856e-06	1.27567e-06	MAPK14/VEGFA/F7/ICAM1/IL6/SERPINE1/CXCL10	7
GO:0010595	positive regulation of endothelial cell migration	7/59	128/18670	1.53134e-07	2.9856e-06	1.27567e-06	PTGS2/AKT1/VEGFA/HIF1A/KDR/HMOX1/NOS3	7
GO:0001667	ameboidal-type cell migration	11/59	461/18670	1.77591e-07	3.40987e-06	1.45695e-06	PTGS2/PPARG/DPP4/AKT1/VEGFA/MMP9/HIF1A/KDR/IL4/HMOX1/NOS3	11
GO:0043542	endothelial cell migration	9/59	273/18670	1.77685e-07	3.40987e-06	1.45695e-06	PTGS2/PPARG/DPP4/AKT1/VEGFA/HIF1A/KDR/HMOX1/NOS3	9
GO:0071260	cellular response to mechanical stimulus	6/59	79/18670	1.7837e-07	3.40987e-06	1.45695e-06	PTGS2/AKT1/MAPK8/IL1B/COL1A1/CASP1	6
GO:0022617	extracellular matrix disassembly	6/59	80/18670	1.92363e-07	3.65365e-06	1.56111e-06	DPP4/MMP9/MMP1/MMP3/MMP2/IL6	6
GO:0032355	response to estradiol	7/59	134/18670	2.09541e-07	3.95441e-06	1.68962e-06	PTGS2/SLC6A4/CASP3/ESR1/CAT/F7/COL1A1	7
GO:0050708	regulation of protein secretion	11/59	472/18670	2.24831e-07	4.21595e-06	1.80137e-06	MAPK14/NOS2/DPP4/HIF1A/IL6/IL1B/IL2/IL1A/CRP/CD40LG/CASP1	11
GO:0051098	regulation of binding	10/59	373/18670	2.36202e-07	4.40112e-06	1.88049e-06	ADRB2/PON1/PPARG/AKT1/MMP9/MAPK8/HMOX1/EGF/CAV1/PPARA	10
GO:0097756	negative regulation of blood vessel diameter	6/59	84/18670	2.57683e-07	4.77118e-06	2.0386e-06	PTGS2/SLC6A4/AKT1/ICAM1/CAV1/CRP	6
GO:0060749	mammary gland alveolus development	4/59	18/18670	2.66246e-07	4.86849e-06	2.08018e-06	ESR1/VEGFA/HIF1A/EGF	4
GO:0061377	mammary gland lobule development	4/59	18/18670	2.66246e-07	4.86849e-06	2.08018e-06	ESR1/VEGFA/HIF1A/EGF	4
GO:0002700	regulation of production of molecular mediator of immune response	7/59	139/18670	2.69068e-07	4.88973e-06	2.08925e-06	MAPK14/IL4/HMOX1/IL6/IL1B/IL2/CD40LG	7
GO:0002696	positive regulation of leukocyte activation	10/59	380/18670	2.80332e-07	5.06317e-06	2.16336e-06	DPP4/AKT1/IL4/VCAM1/IL6/CAV1/IL1B/CCL2/IL2/CD40LG	10
GO:0071229	cellular response to acid chemical	8/59	209/18670	2.93068e-07	5.26094e-06	2.24786e-06	SLC6A4/PPARG/AKT1/VEGFA/KDR/MMP2/COL1A1/COL3A1	8
GO:0006631	fatty acid metabolic process	10/59	383/18670	3.01361e-07	5.37702e-06	2.29746e-06	PTGS1/PTGS2/PON1/PPARG/MAPK14/AKT1/ALOX5/CAV1/IL1B/PPARA	10
GO:0071356	cellular response to tumor necrosis factor	9/59	291/18670	3.04682e-07	5.40352e-06	2.30879e-06	MAPK14/AKT1/STAT1/ICAM1/VCAM1/CCL2/COL1A1/CD40LG/CASP1	9
GO:0002690	positive regulation of leukocyte chemotaxis	6/59	87/18670	3.17794e-07	5.60232e-06	2.39372e-06	MAPK14/VEGFA/F7/IL6/SERPINE1/CXCL10	6
GO:0045776	negative regulation of blood pressure	5/59	46/18670	3.29015e-07	5.73148e-06	2.44891e-06	ADRB2/ADRB1/NOS2/NOS3/PPARA	5
GO:1904036	negative regulation of epithelial cell apoptotic process	5/59	46/18670	3.29015e-07	5.73148e-06	2.44891e-06	KDR/IL4/HMOX1/ICAM1/SERPINE1	5
GO:0010888	negative regulation of lipid storage	4/59	19/18670	3.3645e-07	5.82652e-06	2.48952e-06	PPARG/IL6/PPARA/CRP	4
GO:0006953	acute-phase response	5/59	47/18670	3.67297e-07	6.32351e-06	2.70187e-06	PTGS2/IL6/IL1B/IL1A/CRP	5
GO:0042542	response to hydrogen peroxide	7/59	146/18670	3.75877e-07	6.43361e-06	2.74891e-06	CASP3/SOD1/CAT/STAT1/HMOX1/IL6/COL1A1	7
GO:0010959	regulation of metal ion transport	10/59	394/18670	3.90817e-07	6.61244e-06	2.82532e-06	PTGS2/SCN5A/ADRB2/AKT1/ICAM1/EGF/CAV1/CCL2/NOS3/CXCL10	10
GO:0050867	positive regulation of cell activation	10/59	394/18670	3.90817e-07	6.61244e-06	2.82532e-06	DPP4/AKT1/IL4/VCAM1/IL6/CAV1/IL1B/CCL2/IL2/CD40LG	10
GO:0002791	regulation of peptide secretion	11/59	500/18670	3.98933e-07	6.7112e-06	2.86752e-06	MAPK14/NOS2/DPP4/HIF1A/IL6/IL1B/IL2/IL1A/CRP/CD40LG/CASP1	11
GO:0061041	regulation of wound healing	7/59	148/18670	4.12245e-07	6.89573e-06	2.94637e-06	F7/CAV1/F3/NOS3/PLAT/THBD/SERPINE1	7
GO:0001890	placenta development	7/59	152/18670	4.93916e-07	8.21093e-06	3.50832e-06	PTGS2/PPARG/MAPK14/AKT1/HIF1A/SOD1/SPP1	7
GO:0030595	leukocyte chemotaxis	8/59	224/18670	4.96449e-07	8.21093e-06	3.50832e-06	MAPK14/VEGFA/F7/IL6/IL1B/CCL2/SERPINE1/CXCL10	8
GO:0009409	response to cold	5/59	50/18670	5.03673e-07	8.28388e-06	3.53949e-06	ADRB2/ADRB1/PPARG/FOS/CXCL10	5
GO:0030168	platelet activation	7/59	153/18670	5.16334e-07	8.41031e-06	3.59351e-06	IL6/RAF1/NOS3/THBD/COL1A1/COL3A1/CD40LG	7
GO:0055093	response to hyperoxia	4/59	21/18670	5.17074e-07	8.41031e-06	3.59351e-06	PPARG/CAT/CAV1/COL1A1	4
GO:0042102	positive regulation of T cell proliferation	6/59	95/18670	5.36391e-07	8.67656e-06	3.70727e-06	IL4/VCAM1/IL6/IL1B/IL2/CD40LG	6
GO:0048260	positive regulation of receptor-mediated endocytosis	5/59	51/18670	5.57075e-07	8.91321e-06	3.80838e-06	VEGFA/IL4/SELE/EGF/SERPINE1	5
GO:0050999	regulation of nitric-oxide synthase activity	5/59	51/18670	5.57075e-07	8.91321e-06	3.80838e-06	AKT1/HIF1A/CAV1/IL1B/NOS3	5
GO:0008585	female gonad development	6/59	96/18670	5.70758e-07	9.03394e-06	3.85997e-06	CASP3/ESR1/VEGFA/SOD1/ICAM1/NOS3	6
GO:0019217	regulation of fatty acid metabolic process	6/59	96/18670	5.70758e-07	9.03394e-06	3.85997e-06	PTGS2/PPARG/AKT1/CAV1/IL1B/PPARA	6
GO:0010594	regulation of endothelial cell migration	8/59	229/18670	5.86795e-07	9.17138e-06	3.91869e-06	PTGS2/PPARG/AKT1/VEGFA/HIF1A/KDR/HMOX1/NOS3	8
GO:0007259	JAK-STAT cascade	7/59	156/18670	5.88788e-07	9.17138e-06	3.91869e-06	IL4/STAT1/EGF/IL6/CAV1/CCL2/IL2	7
GO:0042129	regulation of T cell proliferation	7/59	156/18670	5.88788e-07	9.17138e-06	3.91869e-06	CASP3/IL4/VCAM1/IL6/IL1B/IL2/CD40LG	7
GO:0031281	positive regulation of cyclase activity	4/59	22/18670	6.30491e-07	9.7693e-06	4.17417e-06	MAPK14/NOS2/MAPK8/NOS3	4
GO:0071453	cellular response to oxygen levels	8/59	234/18670	6.90859e-07	1.06486e-05	4.54988e-06	PTGS2/PPARG/AKT1/VEGFA/HIF1A/HMOX1/ICAM1/CAV1	8
GO:0046545	development of primary female sexual characteristics	6/59	101/18670	7.70821e-07	1.18193e-05	5.05006e-06	CASP3/ESR1/VEGFA/SOD1/ICAM1/NOS3	6
GO:0052548	regulation of endopeptidase activity	10/59	425/18670	7.79908e-07	1.18966e-05	5.08312e-06	PTGS2/PPARG/AKT1/VEGFA/MMP9/CYCS/RAF1/F3/SERPINE1/CASP1	10
GO:0031214	biomineral tissue development	7/59	163/18670	7.91685e-07	1.2014e-05	5.13328e-06	PTGS2/ADRB2/HIF1A/NOS3/COL1A1/PPARA/SPP1	7
GO:0098869	cellular oxidant detoxification	6/59	102/18670	8.17005e-07	1.23347e-05	5.27029e-06	PTGS1/PTGS2/MPO/SOD1/CAT/NOS3	6
GO:0097696	STAT cascade	7/59	166/18670	8.95056e-07	1.34441e-05	5.74432e-06	IL4/STAT1/EGF/IL6/CAV1/CCL2/IL2	7
GO:0071902	positive regulation of protein serine/threonine kinase activity	9/59	334/18670	9.64225e-07	1.44095e-05	6.15682e-06	ADRB2/MAPK14/AKT1/VEGFA/SOD1/EGF/RAF1/IL1B/CD40LG	9
GO:0033138	positive regulation of peptidyl-serine phosphorylation	6/59	105/18670	9.69345e-07	1.44129e-05	6.15825e-06	PTGS2/AKT1/VEGFA/IL6/RAF1/CAV1	6
GO:0031663	lipopolysaccharide-mediated signaling pathway	5/59	58/18670	1.06846e-06	1.57277e-05	6.72002e-06	MAPK14/AKT1/IL1B/CCL2/NOS3	5
GO:1902041	regulation of extrinsic apoptotic signaling pathway via death domain receptors	5/59	58/18670	1.06846e-06	1.57277e-05	6.72002e-06	HMOX1/ICAM1/RAF1/NOS3/SERPINE1	5
GO:0050927	positive regulation of positive chemotaxis	4/59	25/18670	1.08264e-06	1.58572e-05	6.77535e-06	VEGFA/F7/KDR/F3	4
GO:0097755	positive regulation of blood vessel diameter	5/59	59/18670	1.16458e-06	1.69728e-05	7.25205e-06	ADRB2/ADRB1/SOD1/HMOX1/NOS3	5
GO:0030194	positive regulation of blood coagulation	4/59	26/18670	1.27647e-06	1.83314e-05	7.83251e-06	F7/F3/THBD/SERPINE1	4
GO:0050926	regulation of positive chemotaxis	4/59	26/18670	1.27647e-06	1.83314e-05	7.83251e-06	VEGFA/F7/KDR/F3	4
GO:1900048	positive regulation of hemostasis	4/59	26/18670	1.27647e-06	1.83314e-05	7.83251e-06	F7/F3/THBD/SERPINE1	4
GO:0048638	regulation of developmental growth	9/59	347/18670	1.32275e-06	1.88469e-05	8.05279e-06	ADRB2/SLC6A4/ADRB1/MAPK14/AKT1/VEGFA/SOD1/PPARA/SPP1	9
GO:0009408	response to heat	7/59	176/18670	1.32517e-06	1.88469e-05	8.05279e-06	PTGS2/AKT1/SOD1/HMOX1/NOS3/IL1A/CXCL10	7
GO:0001938	positive regulation of endothelial cell proliferation	6/59	112/18670	1.41664e-06	1.9955e-05	8.52625e-06	AKT1/VEGFA/HIF1A/KDR/HMOX1/F3	6
GO:1990748	cellular detoxification	6/59	112/18670	1.41664e-06	1.9955e-05	8.52625e-06	PTGS1/PTGS2/MPO/SOD1/CAT/NOS3	6
GO:0043200	response to amino acid	6/59	113/18670	1.49244e-06	2.08583e-05	8.91219e-06	CASP3/F7/ICAM1/MMP2/COL1A1/COL3A1	6
GO:0050820	positive regulation of coagulation	4/59	27/18670	1.49494e-06	2.08583e-05	8.91219e-06	F7/F3/THBD/SERPINE1	4
GO:0071346	cellular response to interferon-gamma	7/59	180/18670	1.54002e-06	2.13859e-05	9.13766e-06	PPARG/NOS2/STAT1/ICAM1/VCAM1/CCL2/CASP1	7
GO:0046660	female sex differentiation	6/59	115/18670	1.65399e-06	2.28608e-05	9.76785e-06	CASP3/ESR1/VEGFA/SOD1/ICAM1/NOS3	6
GO:0036296	response to increased oxygen levels	4/59	28/18670	1.73999e-06	2.3937e-05	1.02277e-05	PPARG/CAT/CAV1/COL1A1	4
GO:0032768	regulation of monooxygenase activity	5/59	64/18670	1.75235e-06	2.3995e-05	1.02524e-05	AKT1/HIF1A/CAV1/IL1B/NOS3	5
GO:0042098	T cell proliferation	7/59	184/18670	1.78331e-06	2.43058e-05	1.03853e-05	CASP3/IL4/VCAM1/IL6/IL1B/IL2/CD40LG	7
GO:0045862	positive regulation of proteolysis	9/59	363/18670	1.91771e-06	2.60173e-05	1.11165e-05	PPARG/MAPK14/AKT1/CYCS/EGF/CAV1/F3/IL1B/CASP1	9
GO:0043491	protein kinase B signaling	8/59	269/18670	1.96548e-06	2.6543e-05	1.13411e-05	ESR1/AKT1/F7/KDR/EGF/F3/IL1B/CCL2	8
GO:0006869	lipid transport	9/59	365/18670	2.00625e-06	2.69699e-05	1.15235e-05	PON1/PPARG/NOS2/AKT1/EGF/CAV1/IL1B/PPARA/SPP1	9
GO:0045428	regulation of nitric oxide biosynthetic process	5/59	66/18670	2.04411e-06	2.73539e-05	1.16876e-05	PTGS2/AKT1/ICAM1/CAV1/IL1B	5
GO:0035690	cellular response to drug	9/59	369/18670	2.19397e-06	2.92265e-05	1.24877e-05	PTGS2/NOS2/SOD1/KDR/HMOX1/ICAM1/MMP3/IL6/IL1B	9
GO:0043270	positive regulation of ion transport	8/59	275/18670	2.31608e-06	3.07141e-05	1.31233e-05	SCN5A/ADRB2/SLC6A4/AKT1/CAV1/IL1B/CCL2/CXCL10	8
GO:0034101	erythrocyte homeostasis	6/59	122/18670	2.33591e-06	3.07733e-05	1.31486e-05	CASP3/MAPK14/VEGFA/HIF1A/STAT1/HMOX1	6
GO:0043112	receptor metabolic process	7/59	192/18670	2.36719e-06	3.07733e-05	1.31486e-05	PPARG/VEGFA/HIF1A/SELE/EGF/CAV1/PPARA	7
GO:0016239	positive regulation of macroautophagy	5/59	68/18670	2.3728e-06	3.07733e-05	1.31486e-05	ADRB2/HIF1A/KDR/IL4/HMOX1	5
GO:0035924	cellular response to vascular endothelial growth factor stimulus	5/59	68/18670	2.3728e-06	3.07733e-05	1.31486e-05	MAPK14/AKT1/VEGFA/KDR/VCAM1	5
GO:0050918	positive chemotaxis	5/59	68/18670	2.3728e-06	3.07733e-05	1.31486e-05	VEGFA/F7/KDR/F3/CXCL10	5
GO:1901654	response to ketone	7/59	193/18670	2.45028e-06	3.16388e-05	1.35184e-05	PPARG/AKT1/FOS/F7/ICAM1/CAV1/SPP1	7
GO:0034341	response to interferon-gamma	7/59	199/18670	3.00175e-06	3.8581e-05	1.64847e-05	PPARG/NOS2/STAT1/ICAM1/VCAM1/CCL2/CASP1	7
GO:0042311	vasodilation	4/59	32/18670	3.02725e-06	3.8581e-05	1.64847e-05	ADRB2/ADRB1/SOD1/NOS3	4
GO:0045907	positive regulation of vasoconstriction	4/59	32/18670	3.02725e-06	3.8581e-05	1.64847e-05	PTGS2/AKT1/ICAM1/CAV1	4
GO:0038034	signal transduction in absence of ligand	5/59	72/18670	3.15429e-06	3.9855e-05	1.7029e-05	CASP3/AKT1/IL1B/IL2/IL1A	5
GO:0097192	extrinsic apoptotic signaling pathway in absence of ligand	5/59	72/18670	3.15429e-06	3.9855e-05	1.7029e-05	CASP3/AKT1/IL1B/IL2/IL1A	5
GO:0097193	intrinsic apoptotic signaling pathway	8/59	289/18670	3.34661e-06	4.18064e-05	1.78628e-05	PTGS2/CASP3/AKT1/MMP9/HIF1A/SOD1/HMOX1/CAV1	8
GO:0006801	superoxide metabolic process	5/59	73/18670	3.37807e-06	4.18064e-05	1.78628e-05	NOS2/MPO/SOD1/NOS3/CRP	5
GO:0043627	response to estrogen	5/59	73/18670	3.37807e-06	4.18064e-05	1.78628e-05	ESR1/PPARG/F7/HMOX1/CAV1	5
GO:1903524	positive regulation of blood circulation	5/59	73/18670	3.37807e-06	4.18064e-05	1.78628e-05	PTGS2/ADRB1/AKT1/ICAM1/CAV1	5
GO:0050671	positive regulation of lymphocyte proliferation	6/59	130/18670	3.37973e-06	4.18064e-05	1.78628e-05	IL4/VCAM1/IL6/IL1B/IL2/CD40LG	6
GO:2000352	negative regulation of endothelial cell apoptotic process	4/59	33/18670	3.43669e-06	4.23331e-05	1.80878e-05	KDR/IL4/ICAM1/SERPINE1	4
GO:0032946	positive regulation of mononuclear cell proliferation	6/59	131/18670	3.53334e-06	4.30774e-05	1.84059e-05	IL4/VCAM1/IL6/IL1B/IL2/CD40LG	6
GO:0098754	detoxification	6/59	131/18670	3.53334e-06	4.30774e-05	1.84059e-05	PTGS1/PTGS2/MPO/SOD1/CAT/NOS3	6
GO:0001660	fever generation	3/59	10/18670	3.54101e-06	4.30774e-05	1.84059e-05	PTGS2/IL1B/IL1A	3
GO:0031670	cellular response to nutrient	5/59	74/18670	3.61414e-06	4.37861e-05	1.87087e-05	PTGS2/PPARG/SOD1/HMOX1/COL1A1	5
GO:0050679	positive regulation of epithelial cell proliferation	7/59	206/18670	3.77255e-06	4.5518e-05	1.94487e-05	SCN5A/AKT1/VEGFA/HIF1A/KDR/HMOX1/F3	7
GO:0016236	macroautophagy	8/59	295/18670	3.89496e-06	4.66141e-05	1.9917e-05	ADRB2/CASP3/AKT1/HIF1A/KDR/IL4/MAPK8/HMOX1	8
GO:0070555	response to interleukin-1	7/59	207/18670	3.89506e-06	4.66141e-05	1.9917e-05	HIF1A/ICAM1/SELE/IL6/IL1B/CCL2/IL1A	7
GO:0007623	circadian rhythm	7/59	208/18670	4.02087e-06	4.77316e-05	2.03945e-05	SLC6A4/PPARG/NOS2/F7/MAPK8/SERPINE1/PPARA	7
GO:0050670	regulation of lymphocyte proliferation	7/59	208/18670	4.02087e-06	4.77316e-05	2.03945e-05	CASP3/IL4/VCAM1/IL6/IL1B/IL2/CD40LG	7
GO:1903522	regulation of blood circulation	8/59	297/18670	4.09392e-06	4.84036e-05	2.06816e-05	PTGS2/SCN5A/ADRB1/AKT1/ICAM1/CAV1/NOS3/IL2	8
GO:0042310	vasoconstriction	5/59	76/18670	4.12506e-06	4.85069e-05	2.07258e-05	PTGS2/SLC6A4/AKT1/ICAM1/CAV1	5
GO:0032944	regulation of mononuclear cell proliferation	7/59	209/18670	4.15005e-06	4.85069e-05	2.07258e-05	CASP3/IL4/VCAM1/IL6/IL1B/IL2/CD40LG	7
GO:1903532	positive regulation of secretion by cell	9/59	399/18670	4.15209e-06	4.85069e-05	2.07258e-05	SLC6A4/MAPK14/HIF1A/IL6/IL1B/IL2/IL1A/SPP1/CASP1	9
GO:0097529	myeloid leukocyte migration	7/59	210/18670	4.28268e-06	4.98348e-05	2.12931e-05	MAPK14/VEGFA/IL6/IL1B/CCL2/SERPINE1/CXCL10	7
GO:0018105	peptidyl-serine phosphorylation	8/59	299/18670	4.30144e-06	4.9856e-05	2.13022e-05	PTGS2/MAPK14/AKT1/VEGFA/MAPK8/IL6/RAF1/CAV1	8
GO:0010742	macrophage derived foam cell differentiation	4/59	36/18670	4.91232e-06	5.64917e-05	2.41374e-05	PPARG/STAT1/PPARA/CRP	4
GO:0090077	foam cell differentiation	4/59	36/18670	4.91232e-06	5.64917e-05	2.41374e-05	PPARG/STAT1/PPARA/CRP	4
GO:0033135	regulation of peptidyl-serine phosphorylation	6/59	139/18670	4.97884e-06	5.68128e-05	2.42747e-05	PTGS2/AKT1/VEGFA/IL6/RAF1/CAV1	6
GO:0070665	positive regulation of leukocyte proliferation	6/59	139/18670	4.97884e-06	5.68128e-05	2.42747e-05	IL4/VCAM1/IL6/IL1B/IL2/CD40LG	6
GO:0045923	positive regulation of fatty acid metabolic process	4/59	37/18670	5.4948e-06	6.2218e-05	2.65841e-05	PTGS2/PPARG/IL1B/PPARA	4
GO:0090050	positive regulation of cell migration involved in sprouting angiogenesis	4/59	37/18670	5.4948e-06	6.2218e-05	2.65841e-05	PTGS2/VEGFA/KDR/HMOX1	4
GO:0030099	myeloid cell differentiation	9/59	416/18670	5.82094e-06	6.56585e-05	2.80542e-05	CASP3/PPARG/MAPK14/VEGFA/FOS/MMP9/HIF1A/IL4/STAT1	9
GO:0030879	mammary gland development	6/59	143/18670	5.8637e-06	6.58883e-05	2.81524e-05	ESR1/AKT1/VEGFA/HIF1A/EGF/CAV1	6
GO:1901214	regulation of neuron death	8/59	313/18670	6.01995e-06	6.73868e-05	2.87926e-05	CASP3/AKT1/FOS/HIF1A/SOD1/HMOX1/CCL2/PPARA	8
GO:0070663	regulation of leukocyte proliferation	7/59	222/18670	6.17033e-06	6.88086e-05	2.94001e-05	CASP3/IL4/VCAM1/IL6/IL1B/IL2/CD40LG	7
GO:0045444	fat cell differentiation	7/59	223/18670	6.35475e-06	7.05976e-05	3.01645e-05	PTGS2/ADRB2/ADRB1/PPARG/MAPK14/AKT1/IL6	7
GO:0033197	response to vitamin E	3/59	12/18670	6.4627e-06	7.1527e-05	3.05616e-05	PPARG/CAT/COL1A1	3
GO:0043154	negative regulation of cysteine-type endopeptidase activity involved in apoptotic process	5/59	84/18670	6.7615e-06	7.45538e-05	3.18549e-05	PTGS2/AKT1/VEGFA/MMP9/RAF1	5
GO:0010212	response to ionizing radiation	6/59	147/18670	6.87229e-06	7.54927e-05	3.22561e-05	CASP3/MAPK14/ICAM1/VCAM1/THBD/CXCL10	6
GO:0051047	positive regulation of secretion	9/59	428/18670	7.32014e-06	8.01133e-05	3.42304e-05	SLC6A4/MAPK14/HIF1A/IL6/IL1B/IL2/IL1A/SPP1/CASP1	9
GO:0018209	peptidyl-serine modification	8/59	322/18670	7.40691e-06	8.07628e-05	3.45078e-05	PTGS2/MAPK14/AKT1/VEGFA/MAPK8/IL6/RAF1/CAV1	8
GO:0001776	leukocyte homeostasis	5/59	86/18670	7.5909e-06	8.18593e-05	3.49764e-05	CASP3/AKT1/HIF1A/IL6/IL2	5
GO:0008625	extrinsic apoptotic signaling pathway via death domain receptors	5/59	86/18670	7.5909e-06	8.18593e-05	3.49764e-05	HMOX1/ICAM1/RAF1/NOS3/SERPINE1	5
GO:0070542	response to fatty acid	5/59	86/18670	7.5909e-06	8.18593e-05	3.49764e-05	PTGS2/PON1/PPARG/AKT1/CAT	5
GO:0009743	response to carbohydrate	7/59	230/18670	7.77852e-06	8.35765e-05	3.57101e-05	PTGS2/CASP3/HIF1A/CAT/ICAM1/RAF1/IL1B	7
GO:0048732	gland development	9/59	434/18670	8.18645e-06	8.76397e-05	3.74462e-05	ESR1/AKT1/VEGFA/HIF1A/SOD1/HMOX1/EGF/RAF1/CAV1	9
GO:0010506	regulation of autophagy	8/59	327/18670	8.28805e-06	8.84058e-05	3.77735e-05	ADRB2/CASP3/AKT1/HIF1A/KDR/IL4/MAPK8/HMOX1	8
GO:0050873	brown fat cell differentiation	4/59	41/18670	8.34643e-06	8.84532e-05	3.77938e-05	PTGS2/ADRB2/ADRB1/MAPK14	4
GO:0010745	negative regulation of macrophage derived foam cell differentiation	3/59	13/18670	8.38262e-06	8.84532e-05	3.77938e-05	PPARG/PPARA/CRP	3
GO:0090594	inflammatory response to wounding	3/59	13/18670	8.38262e-06	8.84532e-05	3.77938e-05	HIF1A/HMOX1/IL1A	3
GO:0051235	maintenance of location	8/59	330/18670	8.85811e-06	9.31366e-05	3.97949e-05	PPARG/AKT1/IL6/CAV1/IL1B/PPARA/CRP/CXCL10	8
GO:0019932	second-messenger-mediated signaling	9/59	439/18670	8.97414e-06	9.40209e-05	4.01727e-05	ADRB2/ADRB1/NOS2/VEGFA/KDR/SELE/VCAM1/NOS3/CXCL10	9
GO:0071214	cellular response to abiotic stimulus	8/59	331/18670	9.05534e-06	9.42012e-05	4.02497e-05	PTGS2/CASP3/MAPK14/AKT1/MAPK8/IL1B/COL1A1/CASP1	8
GO:0104004	cellular response to environmental stimulus	8/59	331/18670	9.05534e-06	9.42012e-05	4.02497e-05	PTGS2/CASP3/MAPK14/AKT1/MAPK8/IL1B/COL1A1/CASP1	8
GO:0031669	cellular response to nutrient levels	7/59	237/18670	9.45808e-06	9.76618e-05	4.17283e-05	PTGS2/PPARG/SOD1/MAPK8/HMOX1/ICAM1/COL1A1	7
GO:0071674	mononuclear cell migration	5/59	90/18670	9.48752e-06	9.76618e-05	4.17283e-05	MAPK14/IL6/CCL2/SERPINE1/CXCL10	5
GO:1903035	negative regulation of response to wounding	5/59	90/18670	9.48752e-06	9.76618e-05	4.17283e-05	NOS3/PLAT/THBD/SERPINE1/SPP1	5
GO:0030856	regulation of epithelial cell differentiation	6/59	156/18670	9.6616e-06	9.88436e-05	4.22333e-05	VEGFA/MMP9/STAT1/CAV1/IL1B/SERPINE1	6
GO:0030336	negative regulation of cell migration	8/59	334/18670	9.66949e-06	9.88436e-05	4.22333e-05	PPARG/AKT1/IL4/HMOX1/CCL2/SERPINE1/COL3A1/IGFBP3	8
GO:0043271	negative regulation of ion transport	6/59	157/18670	1.00211e-05	0.000102083	4.36175e-05	PTGS2/AKT1/MMP9/ICAM1/CAV1/NOS3	6
GO:0031279	regulation of cyclase activity	4/59	43/18670	1.01234e-05	0.000102416	4.37598e-05	MAPK14/NOS2/MAPK8/NOS3	4
GO:0045429	positive regulation of nitric oxide biosynthetic process	4/59	43/18670	1.01234e-05	0.000102416	4.37598e-05	PTGS2/AKT1/ICAM1/IL1B	4
GO:0043405	regulation of MAP kinase activity	8/59	337/18670	1.03185e-05	0.000104033	4.44505e-05	MAPK14/VEGFA/SOD1/EGF/RAF1/CAV1/IL1B/CD40LG	8
GO:2000117	negative regulation of cysteine-type endopeptidase activity	5/59	92/18670	1.05651e-05	0.000106155	4.53575e-05	PTGS2/AKT1/VEGFA/MMP9/RAF1	5
GO:1904407	positive regulation of nitric oxide metabolic process	4/59	44/18670	1.11095e-05	0.000111246	4.75326e-05	PTGS2/AKT1/ICAM1/IL1B	4
GO:0031960	response to corticosteroid	6/59	162/18670	1.19848e-05	0.000119604	5.11038e-05	PTGS2/CASP3/FOS/ICAM1/IL6/COL1A1	6
GO:1904951	positive regulation of establishment of protein localization	9/59	456/18670	1.21575e-05	0.000120918	5.16652e-05	PTGS2/MAPK14/HIF1A/MAPK8/IL6/IL1B/IL2/IL1A/CASP1	9
GO:0002702	positive regulation of production of molecular mediator of immune response	5/59	95/18670	1.23581e-05	0.0001225	5.23409e-05	MAPK14/IL4/IL6/IL1B/IL2	5
GO:0048010	vascular endothelial growth factor receptor signaling pathway	5/59	96/18670	1.30058e-05	0.000127177	5.43393e-05	MAPK14/VEGFA/HIF1A/KDR/IL1B	5
GO:0070997	neuron death	8/59	348/18670	1.30224e-05	0.000127177	5.43393e-05	CASP3/AKT1/FOS/HIF1A/SOD1/HMOX1/CCL2/PPARA	8
GO:0045926	negative regulation of growth	7/59	249/18670	1.30349e-05	0.000127177	5.43393e-05	ADRB2/SLC6A4/ADRB1/PPARG/HIF1A/PPARA/SPP1	7
GO:0030730	sequestering of triglyceride	3/59	15/18670	1.32761e-05	0.000127177	5.43393e-05	PPARG/IL1B/PPARA	3
GO:0045073	regulation of chemokine biosynthetic process	3/59	15/18670	1.32761e-05	0.000127177	5.43393e-05	HMOX1/IL6/IL1B	3
GO:0051770	positive regulation of nitric-oxide synthase biosynthetic process	3/59	15/18670	1.32761e-05	0.000127177	5.43393e-05	KDR/STAT1/CCL2	3
GO:0010883	regulation of lipid storage	4/59	46/18670	1.32919e-05	0.000127177	5.43393e-05	PPARG/IL6/PPARA/CRP	4
GO:0030810	positive regulation of nucleotide biosynthetic process	4/59	46/18670	1.32919e-05	0.000127177	5.43393e-05	NOS2/HIF1A/IL4/NOS3	4
GO:1900373	positive regulation of purine nucleotide biosynthetic process	4/59	46/18670	1.32919e-05	0.000127177	5.43393e-05	NOS2/HIF1A/IL4/NOS3	4
GO:2000146	negative regulation of cell motility	8/59	349/18670	1.32954e-05	0.000127177	5.43393e-05	PPARG/AKT1/IL4/HMOX1/CCL2/SERPINE1/COL3A1/IGFBP3	8
GO:2001242	regulation of intrinsic apoptotic signaling pathway	6/59	165/18670	1.33052e-05	0.000127177	5.43393e-05	PTGS2/AKT1/MMP9/HIF1A/SOD1/CAV1	6
GO:0015908	fatty acid transport	5/59	97/18670	1.36797e-05	0.000129913	5.55083e-05	PPARG/NOS2/AKT1/IL1B/PPARA	5
GO:0120162	positive regulation of cold-induced thermogenesis	5/59	97/18670	1.36797e-05	0.000129913	5.55083e-05	ADRB2/ADRB1/VEGFA/IL4/CAV1	5
GO:0003012	muscle system process	9/59	465/18670	1.42031e-05	0.00013445	5.74468e-05	PTGS2/SCN5A/ADRB2/SOD1/HMOX1/CAV1/IL1B/NOS3/PPARA	9
GO:0002042	cell migration involved in sprouting angiogenesis	5/59	98/18670	1.43805e-05	0.000135692	5.79779e-05	PTGS2/AKT1/VEGFA/KDR/HMOX1	5
GO:0030574	collagen catabolic process	4/59	47/18670	1.44942e-05	0.000135894	5.80641e-05	MMP9/MMP1/MMP3/MMP2	4
GO:0061614	pri-miRNA transcription by RNA polymerase II	4/59	47/18670	1.44942e-05	0.000135894	5.80641e-05	PPARG/FOS/HIF1A/PPARA	4
GO:0001505	regulation of neurotransmitter levels	8/59	354/18670	1.47338e-05	0.000137702	5.88365e-05	PTGS2/SLC6A4/NOS2/AKT1/ICAM1/CAV1/IL1B/NOS3	8
GO:0051924	regulation of calcium ion transport	7/59	254/18670	1.48243e-05	0.00013811	5.90109e-05	PTGS2/ICAM1/EGF/CAV1/CCL2/NOS3/CXCL10	7
GO:0051100	negative regulation of binding	6/59	169/18670	1.52463e-05	0.000141593	6.0499e-05	ADRB2/AKT1/MAPK8/HMOX1/CAV1/PPARA	6
GO:0050730	regulation of peptidyl-tyrosine phosphorylation	7/59	256/18670	1.55948e-05	0.000144375	6.16876e-05	VEGFA/IL4/ICAM1/EGF/IL6/CAV1/IL2	7
GO:0019372	lipoxygenase pathway	3/59	16/18670	1.63031e-05	0.000149057	6.36882e-05	PTGS2/PON1/ALOX5	3
GO:0042033	chemokine biosynthetic process	3/59	16/18670	1.63031e-05	0.000149057	6.36882e-05	HMOX1/IL6/IL1B	3
GO:0045986	negative regulation of smooth muscle contraction	3/59	16/18670	1.63031e-05	0.000149057	6.36882e-05	PTGS2/ADRB2/SOD1	3
GO:0050755	chemokine metabolic process	3/59	16/18670	1.63031e-05	0.000149057	6.36882e-05	HMOX1/IL6/IL1B	3
GO:0043406	positive regulation of MAP kinase activity	7/59	258/18670	1.63982e-05	0.000149462	6.38613e-05	MAPK14/VEGFA/SOD1/EGF/RAF1/IL1B/CD40LG	7
GO:1903426	regulation of reactive oxygen species biosynthetic process	5/59	101/18670	1.66521e-05	0.000151308	6.465e-05	PTGS2/AKT1/ICAM1/CAV1/IL1B	5
GO:0090257	regulation of muscle system process	7/59	259/18670	1.68126e-05	0.000152296	6.50721e-05	PTGS2/SCN5A/ADRB2/SOD1/CAV1/NOS3/PPARA	7
GO:0030857	negative regulation of epithelial cell differentiation	4/59	49/18670	1.71364e-05	0.00015428	6.592e-05	VEGFA/MMP9/STAT1/CAV1	4
GO:0035094	response to nicotine	4/59	49/18670	1.71364e-05	0.00015428	6.592e-05	CASP3/HMOX1/VCAM1/PPARA	4
GO:0002367	cytokine production involved in immune response	5/59	102/18670	1.74683e-05	0.000156789	6.69919e-05	MAPK14/IL4/HMOX1/IL6/IL1B	5
GO:0018108	peptidyl-tyrosine phosphorylation	8/59	363/18670	1.76542e-05	0.000157976	6.74989e-05	VEGFA/KDR/IL4/ICAM1/EGF/IL6/CAV1/IL2	8
GO:0032091	negative regulation of protein binding	5/59	103/18670	1.83154e-05	0.000162902	6.96039e-05	ADRB2/AKT1/MAPK8/CAV1/PPARA	5
GO:0048259	regulation of receptor-mediated endocytosis	5/59	103/18670	1.83154e-05	0.000162902	6.96039e-05	VEGFA/IL4/SELE/EGF/SERPINE1	5
GO:0018212	peptidyl-tyrosine modification	8/59	366/18670	1.873e-05	0.000166087	7.09648e-05	VEGFA/KDR/IL4/ICAM1/EGF/IL6/CAV1/IL2	8
GO:0071887	leukocyte apoptotic process	5/59	104/18670	1.91942e-05	0.000169693	7.25053e-05	CASP3/AKT1/HIF1A/IL6/IL2	5
GO:0001959	regulation of cytokine-mediated signaling pathway	6/59	177/18670	1.98155e-05	0.000174661	7.46282e-05	PPARG/HIF1A/STAT1/IL6/CAV1/CASP1	6
GO:0050714	positive regulation of protein secretion	7/59	268/18670	2.09472e-05	0.000184085	7.86549e-05	MAPK14/HIF1A/IL6/IL1B/IL2/IL1A/CASP1	7
GO:0071347	cellular response to interleukin-1	6/59	179/18670	2.11149e-05	0.000185007	7.90487e-05	HIF1A/ICAM1/IL6/IL1B/CCL2/IL1A	6
GO:0051341	regulation of oxidoreductase activity	5/59	107/18670	2.20288e-05	0.000192441	8.22251e-05	AKT1/HIF1A/CAV1/IL1B/NOS3	5
GO:0010565	regulation of cellular ketone metabolic process	6/59	181/18670	2.24822e-05	0.000195821	8.36694e-05	PTGS2/PPARG/AKT1/CAV1/IL1B/PPARA	6
GO:0032868	response to insulin	7/59	272/18670	2.3037e-05	0.000199474	8.52299e-05	PPARG/AKT1/CAT/STAT1/ICAM1/IL1B/PPARA	7
GO:0046651	lymphocyte proliferation	7/59	272/18670	2.3037e-05	0.000199474	8.52299e-05	CASP3/IL4/VCAM1/IL6/IL1B/IL2/CD40LG	7
GO:0030195	negative regulation of blood coagulation	4/59	53/18670	2.34616e-05	0.000202554	8.65461e-05	NOS3/PLAT/THBD/SERPINE1	4
GO:0035994	response to muscle stretch	3/59	18/18670	2.36494e-05	0.000202985	8.673e-05	MAPK14/FOS/RAF1	3
GO:0051023	regulation of immunoglobulin secretion	3/59	18/18670	2.36494e-05	0.000202985	8.673e-05	IL6/IL2/CD40LG	3
GO:0032943	mononuclear cell proliferation	7/59	274/18670	2.41448e-05	0.000206635	8.82896e-05	CASP3/IL4/VCAM1/IL6/IL1B/IL2/CD40LG	7
GO:0006636	unsaturated fatty acid biosynthetic process	4/59	54/18670	2.5279e-05	0.00021509	9.19025e-05	PTGS1/PTGS2/ALOX5/IL1B	4
GO:1900047	negative regulation of hemostasis	4/59	54/18670	2.5279e-05	0.00021509	9.19025e-05	NOS3/PLAT/THBD/SERPINE1	4
GO:1903708	positive regulation of hemopoiesis	6/59	185/18670	2.5431e-05	0.000215761	9.21889e-05	MAPK14/FOS/HIF1A/IL4/STAT1/IL2	6
GO:0051271	negative regulation of cellular component movement	8/59	384/18670	2.6412e-05	0.000223439	9.54698e-05	PPARG/AKT1/IL4/HMOX1/CCL2/SERPINE1/COL3A1/IGFBP3	8
GO:1901653	cellular response to peptide	8/59	385/18670	2.69066e-05	0.000226971	9.69788e-05	ADRB2/PPARG/AKT1/STAT1/ICAM1/VCAM1/CAV1/IL1B	8
GO:0001541	ovarian follicle development	4/59	55/18670	2.71975e-05	0.000228118	9.74691e-05	ESR1/VEGFA/SOD1/ICAM1	4
GO:0046456	icosanoid biosynthetic process	4/59	55/18670	2.71975e-05	0.000228118	9.74691e-05	PTGS1/PTGS2/ALOX5/IL1B	4
GO:0030949	positive regulation of vascular endothelial growth factor receptor signaling pathway	3/59	19/18670	2.80205e-05	0.000234353	0.000100133	VEGFA/HIF1A/IL1B	3
GO:0046620	regulation of organ growth	5/59	113/18670	2.86686e-05	0.000238419	0.00010187	SLC6A4/MAPK14/AKT1/SOD1/PPARA	5
GO:0048640	negative regulation of developmental growth	5/59	113/18670	2.86686e-05	0.000238419	0.00010187	ADRB2/SLC6A4/ADRB1/PPARA/SPP1	5
GO:0031295	T cell costimulation	4/59	56/18670	2.92208e-05	0.000242327	0.00010354	DPP4/AKT1/CAV1/CD40LG	4
GO:0060759	regulation of response to cytokine stimulus	6/59	190/18670	2.95471e-05	0.000244345	0.000104402	PPARG/HIF1A/STAT1/IL6/CAV1/CASP1	6
GO:0006690	icosanoid metabolic process	5/59	114/18670	2.99116e-05	0.000245291	0.000104807	PTGS1/PTGS2/PON1/ALOX5/IL1B	5
GO:0030218	erythrocyte differentiation	5/59	114/18670	2.99116e-05	0.000245291	0.000104807	CASP3/MAPK14/VEGFA/HIF1A/STAT1	5
GO:0042035	regulation of cytokine biosynthetic process	5/59	114/18670	2.99116e-05	0.000245291	0.000104807	IL4/HMOX1/IL6/IL1B/IL1A	5
GO:0050731	positive regulation of peptidyl-tyrosine phosphorylation	6/59	192/18670	3.13365e-05	0.000251502	0.00010746	VEGFA/IL4/ICAM1/EGF/IL6/IL2	6
GO:0031294	lymphocyte costimulation	4/59	57/18670	3.13523e-05	0.000251502	0.00010746	DPP4/AKT1/CAV1/CD40LG	4
GO:0042743	hydrogen peroxide metabolic process	4/59	57/18670	3.13523e-05	0.000251502	0.00010746	MPO/SOD1/CAT/MMP3	4
GO:0045981	positive regulation of nucleotide metabolic process	4/59	57/18670	3.13523e-05	0.000251502	0.00010746	NOS2/HIF1A/IL4/NOS3	4
GO:0048008	platelet-derived growth factor receptor signaling pathway	4/59	57/18670	3.13523e-05	0.000251502	0.00010746	VEGFA/F7/F3/PLAT	4
GO:0050819	negative regulation of coagulation	4/59	57/18670	3.13523e-05	0.000251502	0.00010746	NOS3/PLAT/THBD/SERPINE1	4
GO:1900544	positive regulation of purine nucleotide metabolic process	4/59	57/18670	3.13523e-05	0.000251502	0.00010746	NOS2/HIF1A/IL4/NOS3	4
GO:1903428	positive regulation of reactive oxygen species biosynthetic process	4/59	57/18670	3.13523e-05	0.000251502	0.00010746	PTGS2/AKT1/ICAM1/IL1B	4
GO:0002440	production of molecular mediator of immune response	7/59	286/18670	3.17548e-05	0.000254039	0.000108544	MAPK14/IL4/HMOX1/IL6/IL1B/IL2/CD40LG	7
GO:0040013	negative regulation of locomotion	8/59	396/18670	3.28805e-05	0.000261002	0.00011152	PPARG/AKT1/IL4/HMOX1/CCL2/SERPINE1/COL3A1/IGFBP3	8
GO:0051767	nitric-oxide synthase biosynthetic process	3/59	20/18670	3.28913e-05	0.000261002	0.00011152	KDR/STAT1/CCL2	3
GO:0051769	regulation of nitric-oxide synthase biosynthetic process	3/59	20/18670	3.28913e-05	0.000261002	0.00011152	KDR/STAT1/CCL2	3
GO:0002793	positive regulation of peptide secretion	7/59	288/18670	3.31968e-05	0.000262719	0.000112253	MAPK14/HIF1A/IL6/IL1B/IL2/IL1A/CASP1	7
GO:0019229	regulation of vasoconstriction	4/59	58/18670	3.35955e-05	0.000264453	0.000112994	PTGS2/AKT1/ICAM1/CAV1	4
GO:0032722	positive regulation of chemokine production	4/59	58/18670	3.35955e-05	0.000264453	0.000112994	HIF1A/HMOX1/IL6/IL1B	4
GO:0010508	positive regulation of autophagy	5/59	117/18670	3.38931e-05	0.000265021	0.000113236	ADRB2/HIF1A/KDR/IL4/HMOX1	5
GO:1900371	regulation of purine nucleotide biosynthetic process	5/59	117/18670	3.38931e-05	0.000265021	0.000113236	NOS2/HIF1A/IL4/NOS3/PPARA	5
GO:0007162	negative regulation of cell adhesion	7/59	289/18670	3.39378e-05	0.000265021	0.000113236	CASP3/AKT1/VEGFA/IL2/SERPINE1/COL1A1/PPARA	7
GO:0030808	regulation of nucleotide biosynthetic process	5/59	118/18670	3.53077e-05	0.000274989	0.000117496	NOS2/HIF1A/IL4/NOS3/PPARA	5
GO:0010952	positive regulation of peptidase activity	6/59	197/18670	3.61938e-05	0.000281146	0.000120126	PPARG/MAPK14/CYCS/CAV1/F3/CASP1	6
GO:0035162	embryonic hemopoiesis	3/59	21/18670	3.8287e-05	0.000295845	0.000126407	VEGFA/HIF1A/KDR	3
GO:0035743	CD4-positive, alpha-beta T cell cytokine production	3/59	21/18670	3.8287e-05	0.000295845	0.000126407	IL4/IL6/IL1B	3
GO:0045123	cellular extravasation	4/59	61/18670	4.10321e-05	0.000315401	0.000134763	ICAM1/SELE/VCAM1/CCL2	4
GO:0090303	positive regulation of wound healing	4/59	61/18670	4.10321e-05	0.000315401	0.000134763	F7/F3/THBD/SERPINE1	4
GO:0070661	leukocyte proliferation	7/59	298/18670	4.12405e-05	0.000316177	0.000135094	CASP3/IL4/VCAM1/IL6/IL1B/IL2/CD40LG	7
GO:0042089	cytokine biosynthetic process	5/59	123/18670	4.30817e-05	0.000329435	0.000140759	IL4/HMOX1/IL6/IL1B/IL1A	5
GO:0002260	lymphocyte homeostasis	4/59	62/18670	4.37588e-05	0.000333746	0.000142601	CASP3/AKT1/HIF1A/IL2	4
GO:0002573	myeloid leukocyte differentiation	6/59	204/18670	4.39921e-05	0.000333796	0.000142622	PPARG/MAPK14/VEGFA/FOS/MMP9/IL4	6
GO:0035265	organ growth	6/59	204/18670	4.39921e-05	0.000333796	0.000142622	SLC6A4/ESR1/MAPK14/AKT1/SOD1/PPARA	6
GO:0010869	regulation of receptor biosynthetic process	3/59	22/18670	4.42327e-05	0.0003339	0.000142667	PPARG/HIF1A/PPARA	3
GO:0048305	immunoglobulin secretion	3/59	22/18670	4.42327e-05	0.0003339	0.000142667	IL6/IL2/CD40LG	3
GO:0042107	cytokine metabolic process	5/59	124/18670	4.4784e-05	0.000336337	0.000143708	IL4/HMOX1/IL6/IL1B/IL1A	5
GO:0051101	regulation of DNA binding	5/59	124/18670	4.4784e-05	0.000336337	0.000143708	PPARG/MMP9/MAPK8/HMOX1/EGF	5
GO:0045471	response to ethanol	5/59	125/18670	4.65379e-05	0.000348317	0.000148827	SOD1/CAT/ICAM1/VCAM1/IL2	5
GO:0002637	regulation of immunoglobulin production	4/59	63/18670	4.66157e-05	0.000348317	0.000148827	IL4/IL6/IL2/CD40LG	4
GO:0002064	epithelial cell development	6/59	207/18670	4.77218e-05	0.000353886	0.000151206	ESR1/VEGFA/HIF1A/SOD1/ICAM1/IL1B	6
GO:0034284	response to monosaccharide	6/59	207/18670	4.77218e-05	0.000353886	0.000151206	PTGS2/CASP3/HIF1A/CAT/ICAM1/RAF1	6
GO:0071456	cellular response to hypoxia	6/59	207/18670	4.77218e-05	0.000353886	0.000151206	PTGS2/AKT1/VEGFA/HIF1A/HMOX1/ICAM1	6
GO:0051222	positive regulation of protein transport	8/59	418/18670	4.82006e-05	0.000356539	0.00015234	PTGS2/MAPK14/HIF1A/IL6/IL1B/IL2/IL1A/CASP1	8
GO:1901215	negative regulation of neuron death	6/59	208/18670	4.90198e-05	0.00036169	0.000154541	AKT1/HIF1A/SOD1/HMOX1/CCL2/PPARA	6
GO:0045600	positive regulation of fat cell differentiation	4/59	64/18670	4.96066e-05	0.000363288	0.000155224	PTGS2/PPARG/MAPK14/AKT1	4
GO:0060135	maternal process involved in female pregnancy	4/59	64/18670	4.96066e-05	0.000363288	0.000155224	PTGS2/ESR1/AKT1/SPP1	4
GO:1903672	positive regulation of sprouting angiogenesis	4/59	64/18670	4.96066e-05	0.000363288	0.000155224	PTGS2/VEGFA/KDR/HMOX1	4
GO:0002548	monocyte chemotaxis	4/59	65/18670	5.27354e-05	0.000384289	0.000164197	IL6/CCL2/SERPINE1/CXCL10	4
GO:0006940	regulation of smooth muscle contraction	4/59	65/18670	5.27354e-05	0.000384289	0.000164197	PTGS2/ADRB2/SOD1/CAV1	4
GO:0046879	hormone secretion	7/59	312/18670	5.51341e-05	0.000400777	0.000171242	NOS2/DPP4/HIF1A/IL6/RAF1/IL1B/SPP1	7
GO:0009416	response to light stimulus	7/59	314/18670	5.73998e-05	0.00041622	0.00017784	PTGS2/CASP3/AKT1/FOS/HIF1A/CAT/MAPK8	7
GO:0002092	positive regulation of receptor internalization	3/59	24/18670	5.78737e-05	0.000418625	0.000178867	VEGFA/SELE/EGF	3
GO:0042108	positive regulation of cytokine biosynthetic process	4/59	67/18670	5.94218e-05	0.000428769	0.000183202	HMOX1/IL6/IL1B/IL1A	4
GO:0006898	receptor-mediated endocytosis	7/59	316/18670	5.97414e-05	0.000430021	0.000183737	ADRB2/VEGFA/IL4/SELE/EGF/CAV1/SERPINE1	7
GO:0003158	endothelium development	5/59	132/18670	6.03529e-05	0.000431997	0.000184581	VEGFA/KDR/ICAM1/IL1B/CXCL10	5
GO:0045598	regulation of fat cell differentiation	5/59	132/18670	6.03529e-05	0.000431997	0.000184581	PTGS2/PPARG/MAPK14/AKT1/IL6	5
GO:0002699	positive regulation of immune effector process	6/59	216/18670	6.04562e-05	0.000431997	0.000184581	MAPK14/IL4/HMOX1/IL6/IL1B/IL2	6
GO:0008406	gonad development	6/59	217/18670	6.20242e-05	0.000439998	0.000188	CASP3/ESR1/VEGFA/SOD1/ICAM1/NOS3	6
GO:0036294	cellular response to decreased oxygen levels	6/59	217/18670	6.20242e-05	0.000439998	0.000188	PTGS2/AKT1/VEGFA/HIF1A/HMOX1/ICAM1	6
GO:0043393	regulation of protein binding	6/59	217/18670	6.20242e-05	0.000439998	0.000188	ADRB2/AKT1/MMP9/MAPK8/CAV1/PPARA	6
GO:0019430	removal of superoxide radicals	3/59	25/18670	6.56179e-05	0.000464373	0.000198415	MPO/SOD1/NOS3	3
GO:0009914	hormone transport	7/59	322/18670	6.72406e-05	0.000474715	0.000202834	NOS2/DPP4/HIF1A/IL6/RAF1/IL1B/SPP1	7
GO:0050766	positive regulation of phagocytosis	4/59	70/18670	7.05831e-05	0.000497121	0.000212407	PPARG/SOD1/IL1B/CCL2	4
GO:0046425	regulation of JAK-STAT cascade	5/59	137/18670	7.20171e-05	0.000505594	0.000216027	IL4/EGF/IL6/CAV1/IL2	5
GO:0045137	development of primary sexual characteristics	6/59	223/18670	7.21295e-05	0.000505594	0.000216027	CASP3/ESR1/VEGFA/SOD1/ICAM1/NOS3	6
GO:0032800	receptor biosynthetic process	3/59	26/18670	7.40103e-05	0.000517545	0.000221133	PPARG/HIF1A/PPARA	3
GO:0016485	protein processing	7/59	328/18670	7.54938e-05	0.000526668	0.000225032	CASP3/F7/F3/IL1B/PLAT/SERPINE1/CASP1	7
GO:0001649	osteoblast differentiation	6/59	225/18670	7.57757e-05	0.000527384	0.000225338	AKT1/CAT/IL6/COL1A1/SPP1/IGFBP3	6
GO:0002532	production of molecular mediator involved in inflammatory response	4/59	72/18670	7.88253e-05	0.000547315	0.000233854	MAPK14/NOS2/ALOX5/SERPINE1	4
GO:0001894	tissue homeostasis	6/59	227/18670	7.95676e-05	0.000551169	0.0002355	ADRB2/VEGFA/SOD1/IL6/NOS3/SPP1	6
GO:0008202	steroid metabolic process	7/59	331/18670	7.99209e-05	0.000552317	0.000235991	PON1/ESR1/SOD1/CAT/IL4/IL1B/SPP1	7
GO:0009411	response to UV	5/59	141/18670	8.25409e-05	0.000566139	0.000241896	PTGS2/CASP3/AKT1/CAT/MAPK8	5
GO:0002026	regulation of the force of heart contraction	3/59	27/18670	8.30747e-05	0.000566139	0.000241896	ADRB1/CAV1/NOS3	3
GO:0045932	negative regulation of muscle contraction	3/59	27/18670	8.30747e-05	0.000566139	0.000241896	PTGS2/ADRB2/SOD1	3
GO:0071450	cellular response to oxygen radical	3/59	27/18670	8.30747e-05	0.000566139	0.000241896	MPO/SOD1/NOS3	3
GO:0071451	cellular response to superoxide	3/59	27/18670	8.30747e-05	0.000566139	0.000241896	MPO/SOD1/NOS3	3
GO:1902175	regulation of oxidative stress-induced intrinsic apoptotic signaling pathway	3/59	27/18670	8.30747e-05	0.000566139	0.000241896	AKT1/HIF1A/SOD1	3
GO:1900542	regulation of purine nucleotide metabolic process	5/59	142/18670	8.53478e-05	0.000580286	0.000247941	NOS2/HIF1A/IL4/NOS3/PPARA	5
GO:1903036	positive regulation of response to wounding	4/59	74/18670	8.77467e-05	0.000595222	0.000254323	F7/F3/THBD/SERPINE1	4
GO:0106106	cold-induced thermogenesis	5/59	143/18670	8.82276e-05	0.000595739	0.000254544	ADRB2/ADRB1/VEGFA/IL4/CAV1	5
GO:0120161	regulation of cold-induced thermogenesis	5/59	143/18670	8.82276e-05	0.000595739	0.000254544	ADRB2/ADRB1/VEGFA/IL4/CAV1	5
GO:0002697	regulation of immune effector process	8/59	458/18670	9.13332e-05	0.000615298	0.000262901	MAPK14/IL4/STAT1/HMOX1/IL6/IL1B/IL2/CD40LG	8
GO:1903201	regulation of oxidative stress-induced cell death	4/59	75/18670	9.24726e-05	0.000618339	0.0002642	AKT1/HIF1A/SOD1/MMP3	4
GO:0001516	prostaglandin biosynthetic process	3/59	28/18670	9.28349e-05	0.000618339	0.0002642	PTGS1/PTGS2/IL1B	3
GO:0032770	positive regulation of monooxygenase activity	3/59	28/18670	9.28349e-05	0.000618339	0.0002642	AKT1/HIF1A/IL1B	3
GO:0042730	fibrinolysis	3/59	28/18670	9.28349e-05	0.000618339	0.0002642	PLAT/THBD/SERPINE1	3
GO:0046457	prostanoid biosynthetic process	3/59	28/18670	9.28349e-05	0.000618339	0.0002642	PTGS1/PTGS2/IL1B	3
GO:0006140	regulation of nucleotide metabolic process	5/59	146/18670	9.73179e-05	0.000639931	0.000273426	NOS2/HIF1A/IL4/NOS3/PPARA	5
GO:0045834	positive regulation of lipid metabolic process	5/59	146/18670	9.73179e-05	0.000639931	0.000273426	PTGS2/PPARG/AKT1/IL1B/PPARA	5
GO:0051384	response to glucocorticoid	5/59	146/18670	9.73179e-05	0.000639931	0.000273426	PTGS2/CASP3/FOS/ICAM1/IL6	5
GO:1904892	regulation of STAT cascade	5/59	146/18670	9.73179e-05	0.000639931	0.000273426	IL4/EGF/IL6/CAV1/IL2	5
GO:0001937	negative regulation of endothelial cell proliferation	4/59	76/18670	9.73808e-05	0.000639931	0.000273426	PPARG/STAT1/CAV1/CCL2	4
GO:0061045	negative regulation of wound healing	4/59	76/18670	9.73808e-05	0.000639931	0.000273426	NOS3/PLAT/THBD/SERPINE1	4
GO:0002683	negative regulation of immune system process	8/59	463/18670	9.84755e-05	0.000645684	0.000275884	CASP3/PPARG/AKT1/IL4/HMOX1/CCL2/IL2/COL3A1	8
GO:0043122	regulation of I-kappaB kinase/NF-kappaB signaling	6/59	237/18670	0.000100864	0.000659874	0.000281947	ESR1/AKT1/STAT1/HMOX1/IL1B/CASP1	6
GO:0010721	negative regulation of cell development	7/59	344/18670	0.000101631	0.000663416	0.00028346	SLC6A4/VEGFA/IL6/IL1B/COL3A1/PPARA/SPP1	7
GO:0000303	response to superoxide	3/59	29/18670	0.000103314	0.000671429	0.000286884	MPO/SOD1/NOS3	3
GO:0007263	nitric oxide mediated signal transduction	3/59	29/18670	0.000103314	0.000671429	0.000286884	NOS2/VEGFA/NOS3	3
GO:0051092	positive regulation of NF-kappaB transcription factor activity	5/59	149/18670	0.000107112	0.000694576	0.000296774	CAT/ICAM1/CAV1/IL1B/CD40LG	5
GO:0050663	cytokine secretion	6/59	240/18670	0.000108067	0.000699229	0.000298762	MAPK14/NOS2/IL1B/IL1A/CRP/CASP1	6
GO:0000305	response to oxygen radical	3/59	30/18670	0.000114536	0.000736232	0.000314573	MPO/SOD1/NOS3	3
GO:0010743	regulation of macrophage derived foam cell differentiation	3/59	30/18670	0.000114536	0.000736232	0.000314573	PPARG/PPARA/CRP	3
GO:0046320	regulation of fatty acid oxidation	3/59	30/18670	0.000114536	0.000736232	0.000314573	PPARG/AKT1/PPARA	3
GO:0002449	lymphocyte mediated immunity	7/59	352/18670	0.000117228	0.000751891	0.000321263	IL4/ICAM1/IL6/IL1B/IL2/CRP/CD40LG	7
GO:0000187	activation of MAPK activity	5/59	152/18670	0.000117646	0.000752937	0.00032171	MAPK14/SOD1/EGF/IL1B/CD40LG	5
GO:0050729	positive regulation of inflammatory response	5/59	153/18670	0.000121329	0.00077482	0.000331061	PTGS2/IL6/IL1B/IL2/SERPINE1	5
GO:1990845	adaptive thermogenesis	5/59	154/18670	0.000125099	0.000797169	0.00034061	ADRB2/ADRB1/VEGFA/IL4/CAV1	5
GO:0002675	positive regulation of acute inflammatory response	3/59	31/18670	0.000126523	0.000797612	0.000340799	PTGS2/IL6/IL1B	3
GO:0033198	response to ATP	3/59	31/18670	0.000126523	0.000797612	0.000340799	PTGS2/SOD1/IL1B	3
GO:0043457	regulation of cellular respiration	3/59	31/18670	0.000126523	0.000797612	0.000340799	NOS2/HIF1A/IL4	3
GO:0045648	positive regulation of erythrocyte differentiation	3/59	31/18670	0.000126523	0.000797612	0.000340799	MAPK14/HIF1A/STAT1	3
GO:0045742	positive regulation of epidermal growth factor receptor signaling pathway	3/59	31/18670	0.000126523	0.000797612	0.000340799	AKT1/MMP9/EGF	3
GO:0042180	cellular ketone metabolic process	6/59	248/18670	0.000129293	0.000813327	0.000347514	PTGS2/PPARG/AKT1/CAV1/IL1B/PPARA	6
GO:0032637	interleukin-8 production	4/59	82/18670	0.000130899	0.000818187	0.00034959	NOS2/IL1B/SERPINE1/CRP	4
GO:0032642	regulation of chemokine production	4/59	82/18670	0.000130899	0.000818187	0.00034959	HIF1A/HMOX1/IL6/IL1B	4
GO:0090049	regulation of cell migration involved in sprouting angiogenesis	4/59	82/18670	0.000130899	0.000818187	0.00034959	PTGS2/VEGFA/KDR/HMOX1	4
GO:0010951	negative regulation of endopeptidase activity	6/59	250/18670	0.000135084	0.000840777	0.000359242	PTGS2/AKT1/VEGFA/MMP9/RAF1/SERPINE1	6
GO:0030072	peptide hormone secretion	6/59	250/18670	0.000135084	0.000840777	0.000359242	NOS2/DPP4/HIF1A/IL6/RAF1/IL1B	6
GO:0002460	adaptive immune response based on somatic recombination of immune receptors built from immunoglobulin superfamily domains	7/59	361/18670	0.00013705	0.000848589	0.00036258	IL4/ICAM1/IL6/IL1B/IL2/CRP/CD40LG	7
GO:0042509	regulation of tyrosine phosphorylation of STAT protein	4/59	83/18670	0.000137204	0.000848589	0.00036258	IL4/IL6/CAV1/IL2	4
GO:0045913	positive regulation of carbohydrate metabolic process	4/59	83/18670	0.000137204	0.000848589	0.00036258	AKT1/HIF1A/EGF/PPARA	4
GO:0043467	regulation of generation of precursor metabolites and energy	5/59	158/18670	0.000141087	0.000870778	0.000372061	NOS2/AKT1/HIF1A/IL4/PPARA	5
GO:0045861	negative regulation of proteolysis	7/59	363/18670	0.000141805	0.000873378	0.000373172	PTGS2/AKT1/VEGFA/MMP9/RAF1/PLAT/SERPINE1	7
GO:0002718	regulation of cytokine production involved in immune response	4/59	84/18670	0.000143726	0.00088336	0.000377437	MAPK14/HMOX1/IL6/IL1B	4
GO:0002028	regulation of sodium ion transport	4/59	85/18670	0.00015047	0.000919051	0.000392687	SCN5A/ADRB2/AKT1/NOS3	4
GO:1904705	regulation of vascular smooth muscle cell proliferation	4/59	85/18670	0.00015047	0.000919051	0.000392687	PPARG/MMP9/HMOX1/MMP2	4
GO:1990874	vascular smooth muscle cell proliferation	4/59	85/18670	0.00015047	0.000919051	0.000392687	PPARG/MMP9/HMOX1/MMP2	4
GO:1901186	positive regulation of ERBB signaling pathway	3/59	33/18670	0.000152885	0.000929945	0.000397341	AKT1/MMP9/EGF	3
GO:1901890	positive regulation of cell junction assembly	3/59	33/18670	0.000152885	0.000929945	0.000397341	VEGFA/KDR/CAV1	3
GO:0006919	activation of cysteine-type endopeptidase activity involved in apoptotic process	4/59	86/18670	0.000157439	0.000953707	0.000407494	PPARG/CYCS/F3/CASP1	4
GO:0007260	tyrosine phosphorylation of STAT protein	4/59	86/18670	0.000157439	0.000953707	0.000407494	IL4/IL6/CAV1/IL2	4
GO:0006914	autophagy	8/59	496/18670	0.000158204	0.00095441	0.000407795	ADRB2/CASP3/AKT1/HIF1A/KDR/IL4/MAPK8/HMOX1	8
GO:0061919	process utilizing autophagic mechanism	8/59	496/18670	0.000158204	0.00095441	0.000407795	ADRB2/CASP3/AKT1/HIF1A/KDR/IL4/MAPK8/HMOX1	8
GO:0015718	monocarboxylic acid transport	5/59	162/18670	0.000158596	0.000954822	0.00040797	PPARG/NOS2/AKT1/IL1B/PPARA	5
GO:0051781	positive regulation of cell division	4/59	87/18670	0.00016464	0.000989182	0.000422652	VEGFA/CAT/IL1B/IL1A	4
GO:0097194	execution phase of apoptosis	4/59	88/18670	0.000172075	0.00102756	0.000439051	CASP3/AKT1/IL6/CASP1	4
GO:1900407	regulation of cellular response to oxidative stress	4/59	88/18670	0.000172075	0.00102756	0.000439051	AKT1/HIF1A/SOD1/MMP3	4
GO:2000177	regulation of neural precursor cell proliferation	4/59	88/18670	0.000172075	0.00102756	0.000439051	SLC6A4/VEGFA/HIF1A/EGF	4
GO:0010466	negative regulation of peptidase activity	6/59	262/18670	0.000174304	0.00103667	0.000442942	PTGS2/AKT1/VEGFA/MMP9/RAF1/SERPINE1	6
GO:0015850	organic hydroxy compound transport	6/59	262/18670	0.000174304	0.00103667	0.000442942	SLC6A4/PON1/PPARG/EGF/CAV1/SPP1	6
GO:0032602	chemokine production	4/59	89/18670	0.00017975	0.0010669	0.00045586	HIF1A/HMOX1/IL6/IL1B	4
GO:0001893	maternal placenta development	3/59	35/18670	0.000182579	0.00108046	0.000461651	PTGS2/AKT1/SPP1	3
GO:1901568	fatty acid derivative metabolic process	5/59	167/18670	0.000182768	0.00108046	0.000461651	PTGS1/PTGS2/PON1/ALOX5/IL1B	5
GO:0050728	negative regulation of inflammatory response	5/59	169/18670	0.000193186	0.00113976	0.00048699	PPARG/SOD1/IL4/IL2/PPARA	5
GO:0045639	positive regulation of myeloid cell differentiation	4/59	91/18670	0.000195837	0.00115079	0.000491702	MAPK14/FOS/HIF1A/STAT1	4
GO:0060333	interferon-gamma-mediated signaling pathway	4/59	91/18670	0.000195837	0.00115079	0.000491702	PPARG/STAT1/ICAM1/VCAM1	4
GO:0030947	regulation of vascular endothelial growth factor receptor signaling pathway	3/59	36/18670	0.00019873	0.00116084	0.000495995	VEGFA/HIF1A/IL1B	3
GO:1901099	negative regulation of signal transduction in absence of ligand	3/59	36/18670	0.00019873	0.00116084	0.000495995	AKT1/IL1B/IL1A	3
GO:2001240	negative regulation of extrinsic apoptotic signaling pathway in absence of ligand	3/59	36/18670	0.00019873	0.00116084	0.000495995	AKT1/IL1B/IL1A	3
GO:0007249	I-kappaB kinase/NF-kappaB signaling	6/59	269/18670	0.000201038	0.00117199	0.00050076	ESR1/AKT1/STAT1/HMOX1/IL1B/CASP1	6
GO:0006937	regulation of muscle contraction	5/59	171/18670	0.000204052	0.00118721	0.000507266	PTGS2/SCN5A/ADRB2/SOD1/CAV1	5
GO:0007548	sex differentiation	6/59	270/18670	0.000205107	0.001191	0.000508882	CASP3/ESR1/VEGFA/SOD1/ICAM1/NOS3	6
GO:0036473	cell death in response to oxidative stress	4/59	93/18670	0.000212938	0.00123161	0.000526235	AKT1/HIF1A/SOD1/MMP3	4
GO:1901655	cellular response to ketone	4/59	93/18670	0.000212938	0.00123161	0.000526235	PPARG/AKT1/ICAM1/SPP1	4
GO:0030212	hyaluronan metabolic process	3/59	37/18670	0.00021578	0.00123351	0.000527047	AKT1/EGF/IL1B	3
GO:0033280	response to vitamin D	3/59	37/18670	0.00021578	0.00123351	0.000527047	PTGS2/CXCL10/SPP1	3
GO:0034405	response to fluid shear stress	3/59	37/18670	0.00021578	0.00123351	0.000527047	PTGS2/AKT1/NOS3	3
GO:0038083	peptidyl-tyrosine autophosphorylation	3/59	37/18670	0.00021578	0.00123351	0.000527047	VEGFA/KDR/CAV1	3
GO:0043029	T cell homeostasis	3/59	37/18670	0.00021578	0.00123351	0.000527047	CASP3/AKT1/IL2	3
GO:2000273	positive regulation of signaling receptor activity	3/59	37/18670	0.00021578	0.00123351	0.000527047	ADRB2/EGF/CCL2	3
GO:0042100	B cell proliferation	4/59	95/18670	0.00023109	0.00131847	0.000563347	CASP3/IL4/IL2/CD40LG	4
GO:0007190	activation of adenylate cyclase activity	3/59	38/18670	0.000233751	0.00132594	0.000566539	ADRB2/ADRB1/RAF1	3
GO:0032094	response to food	3/59	38/18670	0.000233751	0.00132594	0.000566539	AKT1/MPO/PPARA	3
GO:1904037	positive regulation of epithelial cell apoptotic process	3/59	38/18670	0.000233751	0.00132594	0.000566539	IL6/CCL2/CD40LG	3
GO:0060485	mesenchyme development	6/59	278/18670	0.000240062	0.00135912	0.000580716	HIF1A/STAT1/IL6/IL1B/NOS3/COL1A1	6
GO:0051604	protein maturation	7/59	397/18670	0.000245445	0.00138693	0.000592598	CASP3/F7/F3/IL1B/PLAT/SERPINE1/CASP1	7
GO:0060047	heart contraction	6/59	280/18670	0.000249494	0.00140644	0.000600935	SCN5A/ADRB1/SOD1/CAV1/NOS3/IL2	6
GO:0051591	response to cAMP	4/59	97/18670	0.000250331	0.00140644	0.000600935	FOS/STAT1/THBD/COL1A1	4
GO:1902882	regulation of response to oxidative stress	4/59	97/18670	0.000250331	0.00140644	0.000600935	AKT1/HIF1A/SOD1/MMP3	4
GO:0051099	positive regulation of binding	5/59	179/18670	0.000252251	0.00141453	0.000604392	PON1/PPARG/MMP9/EGF/CAV1	5
GO:0050764	regulation of phagocytosis	4/59	98/18670	0.000260371	0.00145452	0.00062148	PPARG/SOD1/IL1B/CCL2	4
GO:2001243	negative regulation of intrinsic apoptotic signaling pathway	4/59	98/18670	0.000260371	0.00145452	0.00062148	PTGS2/AKT1/MMP9/HIF1A	4
GO:0032409	regulation of transporter activity	6/59	283/18670	0.000264188	0.00147305	0.000629395	ADRB2/PON1/PPARG/MMP9/CAV1/CCL2	6
GO:0002285	lymphocyte activation involved in immune response	5/59	181/18670	0.000265551	0.00147506	0.000630254	IL4/ICAM1/IL6/IL2/CD40LG	5
GO:0022408	negative regulation of cell-cell adhesion	5/59	181/18670	0.000265551	0.00147506	0.000630254	CASP3/AKT1/VEGFA/IL2/PPARA	5
GO:0019395	fatty acid oxidation	4/59	99/18670	0.000270698	0.001498	0.000640056	PPARG/MAPK14/AKT1/PPARA	4
GO:1901570	fatty acid derivative biosynthetic process	4/59	99/18670	0.000270698	0.001498	0.000640056	PTGS1/PTGS2/ALOX5/IL1B	4
GO:0010821	regulation of mitochondrion organization	5/59	182/18670	0.000272397	0.00150252	0.000641989	AKT1/MMP9/HIF1A/KDR/MAPK8	5
GO:0002369	T cell cytokine production	3/59	40/18670	0.000272536	0.00150252	0.000641989	IL4/IL6/IL1B	3
GO:0015980	energy derivation by oxidation of organic compounds	6/59	285/18670	0.000274357	0.00150973	0.000645068	NOS2/AKT1/HIF1A/CYCS/CAT/IL4	6
GO:0002040	sprouting angiogenesis	5/59	183/18670	0.000279376	0.00153261	0.000654843	PTGS2/AKT1/VEGFA/KDR/HMOX1	5
GO:0051403	stress-activated MAPK cascade	6/59	286/18670	0.000279555	0.00153261	0.000654843	MAPK14/AKT1/VEGFA/MAPK8/IL1B/CD40LG	6
GO:0002824	positive regulation of adaptive immune response based on somatic recombination of immune receptors built from immunoglobulin superfamily domains	4/59	100/18670	0.000281316	0.00153654	0.000656524	IL4/IL6/IL1B/IL2	4
GO:0030301	cholesterol transport	4/59	100/18670	0.000281316	0.00153654	0.000656524	PON1/PPARG/EGF/CAV1	4
GO:0034440	lipid oxidation	4/59	101/18670	0.00029223	0.0015932	0.000680731	PPARG/MAPK14/AKT1/PPARA	4
GO:0061028	establishment of endothelial barrier	3/59	41/18670	0.000293393	0.00159364	0.000680919	VEGFA/ICAM1/IL1B	3
GO:1902893	regulation of pri-miRNA transcription by RNA polymerase II	3/59	41/18670	0.000293393	0.00159364	0.000680919	FOS/HIF1A/PPARA	3
GO:0019216	regulation of lipid metabolic process	7/59	410/18670	0.000298428	0.001618	0.000691328	PTGS2/PPARG/AKT1/SOD1/CAV1/IL1B/PPARA	7
GO:0003015	heart process	6/59	290/18670	0.00030113	0.00162666	0.000695028	SCN5A/ADRB1/SOD1/CAV1/NOS3/IL2	6
GO:0042063	gliogenesis	6/59	290/18670	0.00030113	0.00162666	0.000695028	PPARG/AKT1/SOD1/IL6/IL1B/CCL2	6
GO:0002639	positive regulation of immunoglobulin production	3/59	42/18670	0.000315254	0.00169983	0.000726294	IL4/IL6/IL2	3
GO:0051146	striated muscle cell differentiation	6/59	293/18670	0.000318154	0.00171233	0.000731635	CASP3/MAPK14/AKT1/VEGFA/PPARA/CXCL10	6
GO:0001558	regulation of cell growth	7/59	416/18670	0.000325806	0.00175032	0.000747865	PPARG/AKT1/VEGFA/IL2/PPARA/SPP1/IGFBP3	7
GO:0006692	prostanoid metabolic process	3/59	43/18670	0.000338139	0.00180117	0.000769592	PTGS1/PTGS2/IL1B	3
GO:0006693	prostaglandin metabolic process	3/59	43/18670	0.000338139	0.00180117	0.000769592	PTGS1/PTGS2/IL1B	3
GO:0008631	intrinsic apoptotic signaling pathway in response to oxidative stress	3/59	43/18670	0.000338139	0.00180117	0.000769592	AKT1/HIF1A/SOD1	3
GO:1904646	cellular response to amyloid-beta	3/59	43/18670	0.000338139	0.00180117	0.000769592	ADRB2/ICAM1/VCAM1	3
GO:0002708	positive regulation of lymphocyte mediated immunity	4/59	105/18670	0.000338942	0.00180117	0.000769592	IL4/IL6/IL1B/IL2	4
GO:0002821	positive regulation of adaptive immune response	4/59	105/18670	0.000338942	0.00180117	0.000769592	IL4/IL6/IL1B/IL2	4
GO:0002456	T cell mediated immunity	4/59	106/18670	0.000351409	0.00186405	0.00079646	IL4/ICAM1/IL6/IL1B	4
GO:0045333	cellular respiration	5/59	193/18670	0.000356895	0.00188974	0.000807439	NOS2/HIF1A/CYCS/CAT/IL4	5
GO:0046688	response to copper ion	3/59	44/18670	0.000362068	0.00191027	0.000816207	SOD1/ICAM1/IL1A	3
GO:0061756	leukocyte adhesion to vascular endothelial cell	3/59	44/18670	0.000362068	0.00191027	0.000816207	ICAM1/SELE/VCAM1	3
GO:0006939	smooth muscle contraction	4/59	110/18670	0.000404574	0.0021269	0.000908771	PTGS2/ADRB2/SOD1/CAV1	4
GO:0033559	unsaturated fatty acid metabolic process	4/59	110/18670	0.000404574	0.0021269	0.000908771	PTGS1/PTGS2/ALOX5/IL1B	4
GO:0050866	negative regulation of cell activation	5/59	199/18670	0.00041063	0.00215271	0.000919795	CASP3/HMOX1/NOS3/IL2/THBD	5
GO:0007157	heterophilic cell-cell adhesion via plasma membrane cell adhesion molecules	3/59	46/18670	0.000413138	0.00215271	0.000919795	ICAM1/SELE/VCAM1	3
GO:0022602	ovulation cycle process	3/59	46/18670	0.000413138	0.00215271	0.000919795	CASP3/ESR1/NOS3	3
GO:0071354	cellular response to interleukin-6	3/59	46/18670	0.000413138	0.00215271	0.000919795	STAT1/ICAM1/IL6	3
GO:0071675	regulation of mononuclear cell migration	3/59	46/18670	0.000413138	0.00215271	0.000919795	MAPK14/SERPINE1/CXCL10	3
GO:0009895	negative regulation of catabolic process	6/59	308/18670	0.000414953	0.00215834	0.000922203	MAPK14/NOS2/AKT1/HMOX1/IL1B/PPARA	6
GO:0031623	receptor internalization	4/59	111/18670	0.000418715	0.00217024	0.000927288	VEGFA/SELE/EGF/CAV1	4
GO:0072676	lymphocyte migration	4/59	111/18670	0.000418715	0.00217024	0.000927288	AKT1/ICAM1/CCL2/CXCL10	4
GO:0006816	calcium ion transport	7/59	434/18670	0.000420282	0.00217072	0.000927493	PTGS2/ICAM1/EGF/CAV1/CCL2/NOS3/CXCL10	7
GO:0042391	regulation of membrane potential	7/59	434/18670	0.000420282	0.00217072	0.000927493	SCN5A/ADRB2/ADRB1/AKT1/SOD1/KDR/CAV1	7
GO:0042113	B cell activation	6/59	310/18670	0.000429429	0.00219871	0.000939451	CASP3/IL4/VCAM1/IL6/IL2/CD40LG	6
GO:0002703	regulation of leukocyte mediated immunity	5/59	201/18670	0.000429834	0.00219871	0.000939451	IL4/HMOX1/IL6/IL1B/IL2	5
GO:0015918	sterol transport	4/59	112/18670	0.000433206	0.00219871	0.000939451	PON1/PPARG/EGF/CAV1	4
GO:0021924	cell proliferation in external granule layer	2/59	10/18670	0.000434663	0.00219871	0.000939451	SLC6A4/EGF	2
GO:0021930	cerebellar granule cell precursor proliferation	2/59	10/18670	0.000434663	0.00219871	0.000939451	SLC6A4/EGF	2
GO:0021936	regulation of cerebellar granule cell precursor proliferation	2/59	10/18670	0.000434663	0.00219871	0.000939451	SLC6A4/EGF	2
GO:0031284	positive regulation of guanylate cyclase activity	2/59	10/18670	0.000434663	0.00219871	0.000939451	NOS2/NOS3	2
GO:0033483	gas homeostasis	2/59	10/18670	0.000434663	0.00219871	0.000939451	HIF1A/CAV1	2
GO:0048304	positive regulation of isotype switching to IgG isotypes	2/59	10/18670	0.000434663	0.00219871	0.000939451	IL4/IL2	2
GO:0051918	negative regulation of fibrinolysis	2/59	10/18670	0.000434663	0.00219871	0.000939451	THBD/SERPINE1	2
GO:0060346	bone trabecula formation	2/59	10/18670	0.000434663	0.00219871	0.000939451	MMP2/COL1A1	2
GO:0090336	positive regulation of brown fat cell differentiation	2/59	10/18670	0.000434663	0.00219871	0.000939451	PTGS2/MAPK14	2
GO:0060249	anatomical structure homeostasis	7/59	437/18670	0.000437969	0.00220084	0.000940364	ADRB2/VEGFA/HIF1A/SOD1/IL6/NOS3/SPP1	7
GO:0009746	response to hexose	5/59	202/18670	0.000439687	0.00220084	0.000940364	PTGS2/CASP3/HIF1A/ICAM1/RAF1	5
GO:0002204	somatic recombination of immunoglobulin genes involved in immune response	3/59	47/18670	0.000440318	0.00220084	0.000940364	IL4/IL2/CD40LG	3
GO:0002208	somatic diversification of immunoglobulins involved in immune response	3/59	47/18670	0.000440318	0.00220084	0.000940364	IL4/IL2/CD40LG	3
GO:0045190	isotype switching	3/59	47/18670	0.000440318	0.00220084	0.000940364	IL4/IL2/CD40LG	3
GO:0045646	regulation of erythrocyte differentiation	3/59	47/18670	0.000440318	0.00220084	0.000940364	MAPK14/HIF1A/STAT1	3
GO:2001239	regulation of extrinsic apoptotic signaling pathway in absence of ligand	3/59	47/18670	0.000440318	0.00220084	0.000940364	AKT1/IL1B/IL1A	3
GO:0034764	positive regulation of transmembrane transport	5/59	204/18670	0.000459903	0.00229484	0.000980526	ADRB2/MAPK14/AKT1/CCL2/CXCL10	5
GO:0045446	endothelial cell differentiation	4/59	114/18670	0.000463256	0.00230766	0.000986003	VEGFA/KDR/ICAM1/IL1B	4
GO:0031098	stress-activated protein kinase signaling cascade	6/59	315/18670	0.000467353	0.00232259	0.000992384	MAPK14/AKT1/VEGFA/MAPK8/IL1B/CD40LG	6
GO:0007595	lactation	3/59	48/18670	0.000468621	0.00232259	0.000992384	VEGFA/HIF1A/CAV1	3
GO:0060324	face development	3/59	48/18670	0.000468621	0.00232259	0.000992384	MMP2/RAF1/COL1A1	3
GO:0006109	regulation of carbohydrate metabolic process	5/59	206/18670	0.000480814	0.00237902	0.00101649	AKT1/HIF1A/EGF/PPARA/IGFBP3	5
GO:0030073	insulin secretion	5/59	207/18670	0.000491534	0.00242798	0.00103741	NOS2/DPP4/HIF1A/RAF1/IL1B	5
GO:0007569	cell aging	4/59	116/18670	0.000494766	0.00243577	0.00104074	MAPK14/SOD1/ICAM1/SERPINE1	4
GO:0021782	glial cell development	4/59	116/18670	0.000494766	0.00243577	0.00104074	AKT1/SOD1/IL6/IL1B	4
GO:0002686	negative regulation of leukocyte migration	3/59	49/18670	0.000498066	0.00244384	0.00104419	AKT1/HMOX1/CCL2	3
GO:0003044	regulation of systemic arterial blood pressure mediated by a chemical signal	3/59	49/18670	0.000498066	0.00244384	0.00104419	ADRB2/ADRB1/NOS3	3
GO:0010822	positive regulation of mitochondrion organization	4/59	117/18670	0.00051108	0.00250352	0.00106969	MMP9/HIF1A/KDR/MAPK8	4
GO:0043523	regulation of neuron apoptotic process	5/59	210/18670	0.000524777	0.00253795	0.0010844	CASP3/HIF1A/SOD1/HMOX1/CCL2	5
GO:0050707	regulation of cytokine secretion	5/59	210/18670	0.000524777	0.00253795	0.0010844	MAPK14/IL1B/IL1A/CRP/CASP1	5
GO:0060562	epithelial tube morphogenesis	6/59	322/18670	0.000524789	0.00253795	0.0010844	CASP3/ESR1/VEGFA/HIF1A/EGF/CXCL10	6
GO:0010718	positive regulation of epithelial to mesenchymal transition	3/59	50/18670	0.000528671	0.00253795	0.0010844	IL6/IL1B/COL1A1	3
GO:0070741	response to interleukin-6	3/59	50/18670	0.000528671	0.00253795	0.0010844	STAT1/ICAM1/IL6	3
GO:0019371	cyclooxygenase pathway	2/59	11/18670	0.000530176	0.00253795	0.0010844	PTGS1/PTGS2	2
GO:0021534	cell proliferation in hindbrain	2/59	11/18670	0.000530176	0.00253795	0.0010844	SLC6A4/EGF	2
GO:0031652	positive regulation of heat generation	2/59	11/18670	0.000530176	0.00253795	0.0010844	PTGS2/IL1B	2
GO:0040015	negative regulation of multicellular organism growth	2/59	11/18670	0.000530176	0.00253795	0.0010844	ADRB2/ADRB1	2
GO:0043619	regulation of transcription from RNA polymerase II promoter in response to oxidative stress	2/59	11/18670	0.000530176	0.00253795	0.0010844	HIF1A/HMOX1	2
GO:0046886	positive regulation of hormone biosynthetic process	2/59	11/18670	0.000530176	0.00253795	0.0010844	HIF1A/IL1B	2
GO:0051024	positive regulation of immunoglobulin secretion	2/59	11/18670	0.000530176	0.00253795	0.0010844	IL6/IL2	2
GO:0070673	response to interleukin-18	2/59	11/18670	0.000530176	0.00253795	0.0010844	AKT1/ALOX5	2
GO:0072683	T cell extravasation	2/59	11/18670	0.000530176	0.00253795	0.0010844	ICAM1/CCL2	2
GO:1903829	positive regulation of cellular protein localization	6/59	324/18670	0.00054217	0.00259115	0.00110713	PTGS2/MAPK14/AKT1/MAPK8/EGF/IL1B	6
GO:0097366	response to bronchodilator	3/59	51/18670	0.000560456	0.0026742	0.00114262	SOD1/ICAM1/MMP3	3
GO:0016447	somatic recombination of immunoglobulin gene segments	3/59	52/18670	0.000593438	0.00282243	0.00120595	IL4/IL2/CD40LG	3
GO:2000179	positive regulation of neural precursor cell proliferation	3/59	52/18670	0.000593438	0.00282243	0.00120595	VEGFA/HIF1A/EGF	3
GO:0043500	muscle adaptation	4/59	122/18670	0.000598446	0.00284165	0.00121416	HMOX1/IL1B/NOS3/PPARA	4
GO:0023061	signal release	7/59	462/18670	0.000609768	0.0028861	0.00123316	NOS2/DPP4/HIF1A/IL6/RAF1/IL1B/SPP1	7
GO:0046394	carboxylic acid biosynthetic process	7/59	462/18670	0.000609768	0.0028861	0.00123316	PTGS1/PTGS2/HIF1A/ALOX5/EGF/IL1B/PPARA	7
GO:0071621	granulocyte chemotaxis	4/59	123/18670	0.000617114	0.00291388	0.00124503	MAPK14/IL1B/CCL2/CXCL10	4
GO:0016053	organic acid biosynthetic process	7/59	463/18670	0.000617617	0.00291388	0.00124503	PTGS1/PTGS2/HIF1A/ALOX5/EGF/IL1B/PPARA	7
GO:0010001	glial cell differentiation	5/59	218/18670	0.000621718	0.00292519	0.00124986	PPARG/AKT1/SOD1/IL6/IL1B	5
GO:0032964	collagen biosynthetic process	3/59	53/18670	0.000627637	0.00292519	0.00124986	PPARG/IL6/COL1A1	3
GO:0038066	p38MAPK cascade	3/59	53/18670	0.000627637	0.00292519	0.00124986	MAPK14/VEGFA/IL1B	3
GO:0045661	regulation of myoblast differentiation	3/59	53/18670	0.000627637	0.00292519	0.00124986	MAPK14/CXCL10/IGFBP3	3
GO:0045840	positive regulation of mitotic nuclear division	3/59	53/18670	0.000627637	0.00292519	0.00124986	EGF/IL1B/IL1A	3
GO:0048762	mesenchymal cell differentiation	5/59	219/18670	0.000634719	0.00292519	0.00124986	HIF1A/STAT1/IL6/IL1B/COL1A1	5
GO:0002024	diet induced thermogenesis	2/59	12/18670	0.000634918	0.00292519	0.00124986	ADRB2/ADRB1	2
GO:0006527	arginine catabolic process	2/59	12/18670	0.000634918	0.00292519	0.00124986	NOS2/NOS3	2
GO:0010623	programmed cell death involved in cell development	2/59	12/18670	0.000634918	0.00292519	0.00124986	IL1B/IL1A	2
GO:0010889	regulation of sequestering of triglyceride	2/59	12/18670	0.000634918	0.00292519	0.00124986	PPARG/PPARA	2
GO:0031282	regulation of guanylate cyclase activity	2/59	12/18670	0.000634918	0.00292519	0.00124986	NOS2/NOS3	2
GO:0031392	regulation of prostaglandin biosynthetic process	2/59	12/18670	0.000634918	0.00292519	0.00124986	PTGS2/IL1B	2
GO:0045080	positive regulation of chemokine biosynthetic process	2/59	12/18670	0.000634918	0.00292519	0.00124986	HMOX1/IL1B	2
GO:0048302	regulation of isotype switching to IgG isotypes	2/59	12/18670	0.000634918	0.00292519	0.00124986	IL4/IL2	2
GO:0150065	regulation of deacetylase activity	2/59	12/18670	0.000634918	0.00292519	0.00124986	VEGFA/MAPK8	2
GO:0051346	negative regulation of hydrolase activity	7/59	466/18670	0.000641647	0.00295158	0.00126113	PTGS2/AKT1/VEGFA/MMP9/RAF1/NOS3/SERPINE1	7
GO:0042326	negative regulation of phosphorylation	7/59	468/18670	0.000658078	0.00302243	0.00129141	CASP3/AKT1/CAV1/IL1B/IL2/PPARA/IGFBP3	7
GO:0002720	positive regulation of cytokine production involved in immune response	3/59	54/18670	0.00066307	0.00303118	0.00129514	MAPK14/IL6/IL1B	3
GO:0050994	regulation of lipid catabolic process	3/59	54/18670	0.00066307	0.00303118	0.00129514	AKT1/IL1B/PPARA	3
GO:0051353	positive regulation of oxidoreductase activity	3/59	54/18670	0.00066307	0.00303118	0.00129514	AKT1/HIF1A/IL1B	3
GO:0002090	regulation of receptor internalization	3/59	55/18670	0.000699755	0.00319392	0.00136468	VEGFA/SELE/EGF	3
GO:0002576	platelet degranulation	4/59	128/18670	0.000716703	0.00325778	0.00139196	VEGFA/SOD1/EGF/SERPINE1	4
GO:0034763	negative regulation of transmembrane transport	4/59	128/18670	0.000716703	0.00325778	0.00139196	AKT1/MMP9/CAV1/IL1B	4
GO:0007160	cell-matrix adhesion	5/59	225/18670	0.000717065	0.00325778	0.00139196	VEGFA/KDR/VCAM1/SERPINE1/COL3A1	5
GO:1903706	regulation of hemopoiesis	7/59	475/18670	0.00071824	0.00325809	0.0013921	MAPK14/FOS/HIF1A/SOD1/IL4/STAT1/IL2	7
GO:1904062	regulation of cation transmembrane transport	6/59	342/18670	0.000719615	0.0032593	0.00139261	SCN5A/ADRB2/MMP9/CAV1/CCL2/CXCL10	6
GO:0072330	monocarboxylic acid biosynthetic process	6/59	343/18670	0.00073065	0.0033042	0.0014118	PTGS1/PTGS2/HIF1A/ALOX5/IL1B/PPARA	6
GO:0002381	immunoglobulin production involved in immunoglobulin mediated immune response	3/59	56/18670	0.000737709	0.00332171	0.00141928	IL4/IL2/CD40LG	3
GO:0090183	regulation of kidney development	3/59	56/18670	0.000737709	0.00332171	0.00141928	VEGFA/MMP9/STAT1	3
GO:1903038	negative regulation of leukocyte cell-cell adhesion	4/59	129/18670	0.000737906	0.00332171	0.00141928	CASP3/AKT1/IL2/PPARA	4
GO:0007171	activation of transmembrane receptor protein tyrosine kinase activity	2/59	13/18670	0.000748834	0.00333016	0.00142289	ADRB2/EGF	2
GO:0031650	regulation of heat generation	2/59	13/18670	0.000748834	0.00333016	0.00142289	PTGS2/IL1B	2
GO:0035745	T-helper 2 cell cytokine production	2/59	13/18670	0.000748834	0.00333016	0.00142289	IL4/IL6	2
GO:0045086	positive regulation of interleukin-2 biosynthetic process	2/59	13/18670	0.000748834	0.00333016	0.00142289	IL1B/IL1A	2
GO:0048291	isotype switching to IgG isotypes	2/59	13/18670	0.000748834	0.00333016	0.00142289	IL4/IL2	2
GO:0061430	bone trabecula morphogenesis	2/59	13/18670	0.000748834	0.00333016	0.00142289	MMP2/COL1A1	2
GO:1901550	regulation of endothelial cell development	2/59	13/18670	0.000748834	0.00333016	0.00142289	VEGFA/IL1B	2
GO:1903140	regulation of establishment of endothelial barrier	2/59	13/18670	0.000748834	0.00333016	0.00142289	VEGFA/IL1B	2
GO:0034765	regulation of ion transmembrane transport	7/59	483/18670	0.000792268	0.00351271	0.00150089	SCN5A/ADRB2/AKT1/MMP9/CAV1/CCL2/CXCL10	7
GO:0070838	divalent metal ion transport	7/59	483/18670	0.000792268	0.00351271	0.00150089	PTGS2/ICAM1/EGF/CAV1/CCL2/NOS3/CXCL10	7
GO:0016049	cell growth	7/59	484/18670	0.000801932	0.00354948	0.0015166	PPARG/AKT1/VEGFA/IL2/PPARA/SPP1/IGFBP3	7
GO:0042476	odontogenesis	4/59	132/18670	0.00080418	0.00354948	0.0015166	SCN5A/SERPINE1/COL1A1/PPARA	4
GO:0043280	positive regulation of cysteine-type endopeptidase activity involved in apoptotic process	4/59	132/18670	0.00080418	0.00354948	0.0015166	PPARG/CYCS/F3/CASP1	4
GO:0002705	positive regulation of leukocyte mediated immunity	4/59	133/18670	0.000827176	0.00364552	0.00155764	IL4/IL6/IL1B/IL2	4
GO:0030098	lymphocyte differentiation	6/59	353/18670	0.000848376	0.00373336	0.00159517	SOD1/IL4/VCAM1/IL6/IL2/CD40LG	6
GO:0072511	divalent inorganic cation transport	7/59	489/18670	0.000851664	0.00374224	0.00159896	PTGS2/ICAM1/EGF/CAV1/CCL2/NOS3/CXCL10	7
GO:0001885	endothelial cell development	3/59	59/18670	0.000859367	0.00376484	0.00160862	VEGFA/ICAM1/IL1B	3
GO:0043388	positive regulation of DNA binding	3/59	59/18670	0.000859367	0.00376484	0.00160862	PPARG/MMP9/EGF	3
GO:0031589	cell-substrate adhesion	6/59	354/18670	0.000860909	0.003766	0.00160911	VEGFA/KDR/VCAM1/SERPINE1/COL1A1/COL3A1	6
GO:0014854	response to inactivity	2/59	14/18670	0.000871865	0.00377466	0.00161282	SCN5A/CAT	2
GO:0020027	hemoglobin metabolic process	2/59	14/18670	0.000871865	0.00377466	0.00161282	HIF1A/CAT	2
GO:0030213	hyaluronan biosynthetic process	2/59	14/18670	0.000871865	0.00377466	0.00161282	EGF/IL1B	2
GO:0032310	prostaglandin secretion	2/59	14/18670	0.000871865	0.00377466	0.00161282	NOS2/IL1B	2
GO:0036295	cellular response to increased oxygen levels	2/59	14/18670	0.000871865	0.00377466	0.00161282	PPARG/CAV1	2
GO:0051917	regulation of fibrinolysis	2/59	14/18670	0.000871865	0.00377466	0.00161282	THBD/SERPINE1	2
GO:2001279	regulation of unsaturated fatty acid biosynthetic process	2/59	14/18670	0.000871865	0.00377466	0.00161282	PTGS2/IL1B	2
GO:0034605	cellular response to heat	4/59	137/18670	0.00092382	0.00398787	0.00170391	PTGS2/HMOX1/IL1A/CXCL10	4
GO:1903670	regulation of sprouting angiogenesis	4/59	137/18670	0.00092382	0.00398787	0.00170391	PTGS2/VEGFA/KDR/HMOX1	4
GO:0031348	negative regulation of defense response	5/59	239/18670	0.000940155	0.00404652	0.00172897	PPARG/SOD1/IL4/IL2/PPARA	5
GO:0051402	neuron apoptotic process	5/59	239/18670	0.000940155	0.00404652	0.00172897	CASP3/HIF1A/SOD1/HMOX1/CCL2	5
GO:0006879	cellular iron ion homeostasis	3/59	61/18670	0.000947136	0.00405876	0.0017342	HIF1A/SOD1/HMOX1	3
GO:0030888	regulation of B cell proliferation	3/59	61/18670	0.000947136	0.00405876	0.0017342	CASP3/IL4/IL2	3
GO:0032370	positive regulation of lipid transport	3/59	61/18670	0.000947136	0.00405876	0.0017342	PON1/IL1B/SPP1	3
GO:0002446	neutrophil mediated immunity	7/59	499/18670	0.000958455	0.00410129	0.00175238	MAPK14/MMP9/MPO/CAT/OLR1/ALOX5/IL6	7
GO:0050715	positive regulation of cytokine secretion	4/59	139/18670	0.000975009	0.00416346	0.00177894	MAPK14/IL1B/IL1A/CASP1	4
GO:0042593	glucose homeostasis	5/59	241/18670	0.000975811	0.00416346	0.00177894	PPARG/AKT1/HIF1A/ICAM1/RAF1	5
GO:0002562	somatic diversification of immune receptors via germline recombination within a single locus	3/59	62/18670	0.000993071	0.0042106	0.00179908	IL4/IL2/CD40LG	3
GO:0016444	somatic cell DNA recombination	3/59	62/18670	0.000993071	0.0042106	0.00179908	IL4/IL2/CD40LG	3
GO:0045453	bone resorption	3/59	62/18670	0.000993071	0.0042106	0.00179908	ADRB2/IL6/SPP1	3
GO:0046824	positive regulation of nucleocytoplasmic transport	3/59	62/18670	0.000993071	0.0042106	0.00179908	PTGS2/MAPK14/IL1B	3
GO:0033500	carbohydrate homeostasis	5/59	242/18670	0.000994012	0.0042106	0.00179908	PPARG/AKT1/HIF1A/ICAM1/RAF1	5
GO:0001837	epithelial to mesenchymal transition	4/59	140/18670	0.00100134	0.00421633	0.00180153	HIF1A/IL6/IL1B/COL1A1	4
GO:0032352	positive regulation of hormone metabolic process	2/59	15/18670	0.00100396	0.00421633	0.00180153	HIF1A/IL1B	2
GO:0034349	glial cell apoptotic process	2/59	15/18670	0.00100396	0.00421633	0.00180153	CASP3/CCL2	2
GO:0046321	positive regulation of fatty acid oxidation	2/59	15/18670	0.00100396	0.00421633	0.00180153	PPARG/PPARA	2
GO:2000402	negative regulation of lymphocyte migration	2/59	15/18670	0.00100396	0.00421633	0.00180153	AKT1/CCL2	2
GO:2001028	positive regulation of endothelial cell chemotaxis	2/59	15/18670	0.00100396	0.00421633	0.00180153	VEGFA/KDR	2
GO:0097530	granulocyte migration	4/59	141/18670	0.00102817	0.00431185	0.00184234	MAPK14/IL1B/CCL2/CXCL10	4
GO:0051896	regulation of protein kinase B signaling	5/59	244/18670	0.00103117	0.0043183	0.0018451	ESR1/AKT1/F7/EGF/F3	5
GO:0032371	regulation of sterol transport	3/59	63/18670	0.00104039	0.00433841	0.00185369	PON1/PPARG/EGF	3
GO:0032374	regulation of cholesterol transport	3/59	63/18670	0.00104039	0.00433841	0.00185369	PON1/PPARG/EGF	3
GO:2000401	regulation of lymphocyte migration	3/59	63/18670	0.00104039	0.00433841	0.00185369	AKT1/CCL2/CXCL10	3
GO:0016445	somatic diversification of immunoglobulins	3/59	64/18670	0.00108912	0.00452877	0.00193503	IL4/IL2/CD40LG	3
GO:2000378	negative regulation of reactive oxygen species metabolic process	3/59	64/18670	0.00108912	0.00452877	0.00193503	HIF1A/MMP3/CAV1	3
GO:0051187	cofactor catabolic process	3/59	65/18670	0.00113927	0.00468198	0.00200049	MPO/CAT/HMOX1	3
GO:0072678	T cell migration	3/59	65/18670	0.00113927	0.00468198	0.00200049	ICAM1/CCL2/CXCL10	3
GO:0002822	regulation of adaptive immune response based on somatic recombination of immune receptors built from immunoglobulin superfamily domains	4/59	145/18670	0.00114054	0.00468198	0.00200049	IL4/IL6/IL1B/IL2	4
GO:0007605	sensory perception of sound	4/59	145/18670	0.00114054	0.00468198	0.00200049	CASP3/SOD1/ICAM1/COL1A1	4
GO:0071901	negative regulation of protein serine/threonine kinase activity	4/59	145/18670	0.00114054	0.00468198	0.00200049	CASP3/AKT1/CAV1/IL1B	4
GO:0010885	regulation of cholesterol storage	2/59	16/18670	0.00114505	0.00468198	0.00200049	PPARG/PPARA	2
GO:0032225	regulation of synaptic transmission, dopaminergic	2/59	16/18670	0.00114505	0.00468198	0.00200049	PTGS2/SLC6A4	2
GO:0043217	myelin maintenance	2/59	16/18670	0.00114505	0.00468198	0.00200049	AKT1/SOD1	2
GO:0060965	negative regulation of gene silencing by miRNA	2/59	16/18670	0.00114505	0.00468198	0.00200049	ESR1/PPARG	2
GO:0071380	cellular response to prostaglandin E stimulus	2/59	16/18670	0.00114505	0.00468198	0.00200049	PPARG/AKT1	2
GO:0090335	regulation of brown fat cell differentiation	2/59	16/18670	0.00114505	0.00468198	0.00200049	PTGS2/MAPK14	2
GO:1900451	positive regulation of glutamate receptor signaling pathway	2/59	16/18670	0.00114505	0.00468198	0.00200049	ADRB2/CCL2	2
GO:0071383	cellular response to steroid hormone stimulus	5/59	250/18670	0.00114886	0.00469105	0.00200437	NR3C2/ESR1/PPARG/ICAM1/PPARA	5
GO:0008016	regulation of heart contraction	5/59	251/18670	0.00116941	0.00476173	0.00203457	SCN5A/ADRB1/CAV1/NOS3/IL2	5
GO:0045637	regulation of myeloid cell differentiation	5/59	251/18670	0.00116941	0.00476173	0.00203457	MAPK14/FOS/HIF1A/IL4/STAT1	5
GO:0040014	regulation of multicellular organism growth	3/59	66/18670	0.00119085	0.00482902	0.00206332	ADRB2/ADRB1/SOD1	3
GO:0051785	positive regulation of nuclear division	3/59	66/18670	0.00119085	0.00482902	0.00206332	EGF/IL1B/IL1A	3
GO:0051926	negative regulation of calcium ion transport	3/59	66/18670	0.00119085	0.00482902	0.00206332	PTGS2/ICAM1/NOS3	3
GO:0043524	negative regulation of neuron apoptotic process	4/59	147/18670	0.00119984	0.0048521	0.00207318	HIF1A/SOD1/HMOX1/CCL2	4
GO:0061351	neural precursor cell proliferation	4/59	147/18670	0.00119984	0.0048521	0.00207318	SLC6A4/VEGFA/HIF1A/EGF	4
GO:0048662	negative regulation of smooth muscle cell proliferation	3/59	67/18670	0.00124389	0.00502333	0.00214634	PPARG/HMOX1/IGFBP3	3
GO:0002706	regulation of lymphocyte mediated immunity	4/59	149/18670	0.00126127	0.00507959	0.00217038	IL4/IL6/IL1B/IL2	4
GO:2001056	positive regulation of cysteine-type endopeptidase activity	4/59	149/18670	0.00126127	0.00507959	0.00217038	PPARG/CYCS/F3/CASP1	4
GO:0007611	learning or memory	5/59	256/18670	0.00127625	0.00513289	0.00219315	PTGS2/SLC6A4/CASP3/FOS/HIF1A	5
GO:0008203	cholesterol metabolic process	4/59	150/18670	0.0012928	0.00513772	0.00219521	PON1/SOD1/CAT/IL4	4
GO:0008360	regulation of cell shape	4/59	150/18670	0.0012928	0.00513772	0.00219521	VEGFA/KDR/ICAM1/CCL2	4
GO:0050777	negative regulation of immune response	4/59	150/18670	0.0012928	0.00513772	0.00219521	PPARG/HMOX1/IL2/COL3A1	4
GO:0010715	regulation of extracellular matrix disassembly	2/59	17/18670	0.00129509	0.00513772	0.00219521	DPP4/IL6	2
GO:0015732	prostaglandin transport	2/59	17/18670	0.00129509	0.00513772	0.00219521	NOS2/IL1B	2
GO:0032740	positive regulation of interleukin-17 production	2/59	17/18670	0.00129509	0.00513772	0.00219521	IL6/IL2	2
GO:0032966	negative regulation of collagen biosynthetic process	2/59	17/18670	0.00129509	0.00513772	0.00219521	PPARG/IL6	2
GO:0060644	mammary gland epithelial cell differentiation	2/59	17/18670	0.00129509	0.00513772	0.00219521	AKT1/HIF1A	2
GO:0090185	negative regulation of kidney development	2/59	17/18670	0.00129509	0.00513772	0.00219521	MMP9/STAT1	2
GO:1903209	positive regulation of oxidative stress-induced cell death	2/59	17/18670	0.00129509	0.00513772	0.00219521	SOD1/MMP3	2
GO:0033627	cell adhesion mediated by integrin	3/59	68/18670	0.00129839	0.00513772	0.00219521	DPP4/ICAM1/SERPINE1	3
GO:0071230	cellular response to amino acid stimulus	3/59	68/18670	0.00129839	0.00513772	0.00219521	MMP2/COL1A1/COL3A1	3
GO:0016999	antibiotic metabolic process	4/59	151/18670	0.00132487	0.0052325	0.00223571	MPO/SOD1/CAT/MMP3	4
GO:0042692	muscle cell differentiation	6/59	385/18670	0.0013259	0.0052325	0.00223571	CASP3/MAPK14/AKT1/VEGFA/PPARA/CXCL10	6
GO:0009165	nucleotide biosynthetic process	6/59	386/18670	0.00134357	0.00529514	0.00226247	PTGS2/NOS2/HIF1A/IL4/NOS3/PPARA	6
GO:0042698	ovulation cycle	3/59	69/18670	0.00135438	0.00531638	0.00227155	CASP3/ESR1/NOS3	3
GO:0070227	lymphocyte apoptotic process	3/59	69/18670	0.00135438	0.00531638	0.00227155	AKT1/HIF1A/IL2	3
GO:0071300	cellular response to retinoic acid	3/59	69/18670	0.00135438	0.00531638	0.00227155	SLC6A4/PPARG/COL1A1	3
GO:1901293	nucleoside phosphate biosynthetic process	6/59	390/18670	0.00141606	0.00555111	0.00237185	PTGS2/NOS2/HIF1A/IL4/NOS3/PPARA	6
GO:0010713	negative regulation of collagen metabolic process	2/59	18/18670	0.00145402	0.00565473	0.00241612	PPARG/IL6	2
GO:0010878	cholesterol storage	2/59	18/18670	0.00145402	0.00565473	0.00241612	PPARG/PPARA	2
GO:0031998	regulation of fatty acid beta-oxidation	2/59	18/18670	0.00145402	0.00565473	0.00241612	AKT1/PPARA	2
GO:0071318	cellular response to ATP	2/59	18/18670	0.00145402	0.00565473	0.00241612	PTGS2/SOD1	2
GO:0090026	positive regulation of monocyte chemotaxis	2/59	18/18670	0.00145402	0.00565473	0.00241612	SERPINE1/CXCL10	2
GO:0150078	positive regulation of neuroinflammatory response	2/59	18/18670	0.00145402	0.00565473	0.00241612	IL6/IL1B	2
GO:1902652	secondary alcohol metabolic process	4/59	155/18670	0.00145875	0.00566565	0.00242079	PON1/SOD1/CAT/IL4	4
GO:0042531	positive regulation of tyrosine phosphorylation of STAT protein	3/59	71/18670	0.00147086	0.00570514	0.00243766	IL4/IL6/IL2	3
GO:0046883	regulation of hormone secretion	5/59	266/18670	0.00151142	0.00585475	0.00250158	NOS2/DPP4/HIF1A/IL1B/SPP1	5
GO:0050805	negative regulation of synaptic transmission	3/59	72/18670	0.00153138	0.00590875	0.00252466	PTGS2/SLC6A4/IL1B	3
GO:0051881	regulation of mitochondrial membrane potential	3/59	72/18670	0.00153138	0.00590875	0.00252466	AKT1/SOD1/KDR	3
GO:0061180	mammary gland epithelium development	3/59	72/18670	0.00153138	0.00590875	0.00252466	ESR1/AKT1/HIF1A	3
GO:0031334	positive regulation of protein complex assembly	5/59	268/18670	0.00156204	0.00601918	0.00257184	ESR1/VEGFA/MMP1/ICAM1/MMP3	5
GO:0002312	B cell activation involved in immune response	3/59	73/18670	0.00159344	0.00612415	0.00261669	IL4/IL2/CD40LG	3
GO:0031100	animal organ regeneration	3/59	73/18670	0.00159344	0.00612415	0.00261669	PPARG/F7/HMOX1	3
GO:0002673	regulation of acute inflammatory response	4/59	159/18670	0.00160181	0.00612905	0.00261878	PTGS2/PPARG/IL6/IL1B	4
GO:0002726	positive regulation of T cell cytokine production	2/59	19/18670	0.00162178	0.00612905	0.00261878	IL6/IL1B	2
GO:0003085	negative regulation of systemic arterial blood pressure	2/59	19/18670	0.00162178	0.00612905	0.00261878	ADRB2/ADRB1	2
GO:0010544	negative regulation of platelet activation	2/59	19/18670	0.00162178	0.00612905	0.00261878	NOS3/THBD	2
GO:0032930	positive regulation of superoxide anion generation	2/59	19/18670	0.00162178	0.00612905	0.00261878	SOD1/CRP	2
GO:0033189	response to vitamin A	2/59	19/18670	0.00162178	0.00612905	0.00261878	PPARG/CAT	2
GO:0045076	regulation of interleukin-2 biosynthetic process	2/59	19/18670	0.00162178	0.00612905	0.00261878	IL1B/IL1A	2
GO:0060149	negative regulation of posttranscriptional gene silencing	2/59	19/18670	0.00162178	0.00612905	0.00261878	ESR1/PPARG	2
GO:0060252	positive regulation of glial cell proliferation	2/59	19/18670	0.00162178	0.00612905	0.00261878	IL6/IL1B	2
GO:0060967	negative regulation of gene silencing by RNA	2/59	19/18670	0.00162178	0.00612905	0.00261878	ESR1/PPARG	2
GO:1900409	positive regulation of cellular response to oxidative stress	2/59	19/18670	0.00162178	0.00612905	0.00261878	SOD1/MMP3	2
GO:1902176	negative regulation of oxidative stress-induced intrinsic apoptotic signaling pathway	2/59	19/18670	0.00162178	0.00612905	0.00261878	AKT1/HIF1A	2
GO:2000696	regulation of epithelial cell differentiation involved in kidney development	2/59	19/18670	0.00162178	0.00612905	0.00261878	MMP9/STAT1	2
GO:0002819	regulation of adaptive immune response	4/59	160/18670	0.00163904	0.00618633	0.00264326	IL4/IL6/IL1B/IL2	4
GO:0014015	positive regulation of gliogenesis	3/59	74/18670	0.00165706	0.00623039	0.00266209	PPARG/IL6/IL1B	3
GO:0032677	regulation of interleukin-8 production	3/59	74/18670	0.00165706	0.00623039	0.00266209	IL1B/SERPINE1/CRP	3
GO:1900182	positive regulation of protein localization to nucleus	3/59	74/18670	0.00165706	0.00623039	0.00266209	PTGS2/MAPK14/AKT1	3
GO:0001960	negative regulation of cytokine-mediated signaling pathway	3/59	75/18670	0.00172226	0.00645901	0.00275977	PPARG/IL6/CAV1	3
GO:0002200	somatic diversification of immune receptors	3/59	75/18670	0.00172226	0.00645901	0.00275977	IL4/IL2/CD40LG	3
GO:0016054	organic acid catabolic process	5/59	275/18670	0.00174912	0.00654308	0.00279569	PON1/NOS2/AKT1/NOS3/PPARA	5
GO:0046395	carboxylic acid catabolic process	5/59	275/18670	0.00174912	0.00654308	0.00279569	PON1/NOS2/AKT1/NOS3/PPARA	5
GO:0045931	positive regulation of mitotic cell cycle	4/59	163/18670	0.00175436	0.00655435	0.0028005	AKT1/EGF/IL1B/IL1A	4
GO:0060537	muscle tissue development	6/59	408/18670	0.00178003	0.00664185	0.00283789	MAPK14/VEGFA/FOS/CAV1/COL3A1/PPARA	6
GO:0045454	cell redox homeostasis	3/59	76/18670	0.00178903	0.00666697	0.00284863	NOS2/MPO/NOS3	3
GO:0006633	fatty acid biosynthetic process	4/59	164/18670	0.00179402	0.00667626	0.00285259	PTGS1/PTGS2/ALOX5/IL1B	4
GO:0006525	arginine metabolic process	2/59	20/18670	0.00179833	0.00667626	0.00285259	NOS2/NOS3	2
GO:0097709	connective tissue replacement	2/59	20/18670	0.00179833	0.00667626	0.00285259	HIF1A/IL1A	2
GO:0007517	muscle organ development	6/59	410/18670	0.00182449	0.00676486	0.00289045	MAPK14/FOS/CAV1/COL3A1/PPARA/CXCL10	6
GO:0050680	negative regulation of epithelial cell proliferation	4/59	165/18670	0.0018343	0.00678413	0.00289868	PPARG/STAT1/CAV1/CCL2	4
GO:0050954	sensory perception of mechanical stimulus	4/59	165/18670	0.0018343	0.00678413	0.00289868	CASP3/SOD1/ICAM1/COL1A1	4
GO:0016125	sterol metabolic process	4/59	166/18670	0.0018752	0.00692671	0.0029596	PON1/SOD1/CAT/IL4	4
GO:0010827	regulation of glucose transmembrane transport	3/59	78/18670	0.00192739	0.00711058	0.00303817	MAPK14/AKT1/IL1B	3
GO:0051302	regulation of cell division	4/59	168/18670	0.0019589	0.00721777	0.00308396	VEGFA/CAT/IL1B/IL1A	4
GO:0030728	ovulation	2/59	21/18670	0.00198359	0.00727235	0.00310729	PTGS2/NOS3	2
GO:0046716	muscle cell cellular homeostasis	2/59	21/18670	0.00198359	0.00727235	0.00310729	HIF1A/SOD1	2
GO:1901739	regulation of myoblast fusion	2/59	21/18670	0.00198359	0.00727235	0.00310729	MAPK14/CXCL10	2
GO:1902884	positive regulation of response to oxidative stress	2/59	21/18670	0.00198359	0.00727235	0.00310729	SOD1/MMP3	2
GO:0001570	vasculogenesis	3/59	79/18670	0.001999	0.00731064	0.00312365	VEGFA/KDR/CAV1	3
GO:0055072	iron ion homeostasis	3/59	79/18670	0.001999	0.00731064	0.00312365	HIF1A/SOD1/HMOX1	3
GO:0051348	negative regulation of transferase activity	5/59	285/18670	0.00204429	0.00746698	0.00319045	CASP3/PPARG/AKT1/CAV1/IL1B	5
GO:0060761	negative regulation of response to cytokine stimulus	3/59	81/18670	0.00214715	0.00782463	0.00334326	PPARG/IL6/CAV1	3
GO:0002052	positive regulation of neuroblast proliferation	2/59	22/18670	0.00217753	0.00782463	0.00334326	VEGFA/HIF1A	2
GO:0032928	regulation of superoxide anion generation	2/59	22/18670	0.00217753	0.00782463	0.00334326	SOD1/CRP	2
GO:0035584	calcium-mediated signaling using intracellular calcium source	2/59	22/18670	0.00217753	0.00782463	0.00334326	KDR/VCAM1	2
GO:0042094	interleukin-2 biosynthetic process	2/59	22/18670	0.00217753	0.00782463	0.00334326	IL1B/IL1A	2
GO:0045663	positive regulation of myoblast differentiation	2/59	22/18670	0.00217753	0.00782463	0.00334326	MAPK14/IGFBP3	2
GO:0045723	positive regulation of fatty acid biosynthetic process	2/59	22/18670	0.00217753	0.00782463	0.00334326	PTGS2/IL1B	2
GO:0051000	positive regulation of nitric-oxide synthase activity	2/59	22/18670	0.00217753	0.00782463	0.00334326	AKT1/HIF1A	2
GO:0051195	negative regulation of cofactor metabolic process	2/59	22/18670	0.00217753	0.00782463	0.00334326	MMP3/PPARA	2
GO:0071379	cellular response to prostaglandin stimulus	2/59	22/18670	0.00217753	0.00782463	0.00334326	PPARG/AKT1	2
GO:1901522	positive regulation of transcription from RNA polymerase II promoter involved in cellular response to chemical stimulus	2/59	22/18670	0.00217753	0.00782463	0.00334326	VEGFA/HIF1A	2
GO:1903589	positive regulation of blood vessel endothelial cell proliferation involved in sprouting angiogenesis	2/59	22/18670	0.00217753	0.00782463	0.00334326	VEGFA/HMOX1	2
GO:0010469	regulation of signaling receptor activity	4/59	173/18670	0.00217941	0.00782463	0.00334326	ADRB2/EGF/CCL2/SERPINE1	4
GO:0016525	negative regulation of angiogenesis	4/59	173/18670	0.00217941	0.00782463	0.00334326	PPARG/STAT1/SERPINE1/CXCL10	4
GO:1905954	positive regulation of lipid localization	3/59	82/18670	0.00222372	0.00797398	0.00340707	PON1/IL1B/SPP1	3
GO:0009410	response to xenobiotic stimulus	5/59	292/18670	0.00227157	0.00812813	0.00347294	PTGS1/PPARG/SOD1/F7/ICAM1	5
GO:2000181	negative regulation of blood vessel morphogenesis	4/59	175/18670	0.00227223	0.00812813	0.00347294	PPARG/STAT1/SERPINE1/CXCL10	4
GO:0001933	negative regulation of protein phosphorylation	6/59	429/18670	0.00229021	0.0081825	0.00349617	CASP3/AKT1/CAV1/IL1B/IL2/IGFBP3	6
GO:0050796	regulation of insulin secretion	4/59	176/18670	0.00231965	0.00826762	0.00353254	NOS2/DPP4/HIF1A/IL1B	4
GO:0051897	positive regulation of protein kinase B signaling	4/59	176/18670	0.00231965	0.00826762	0.00353254	ESR1/F7/EGF/F3	4
GO:0050768	negative regulation of neurogenesis	5/59	295/18670	0.00237442	0.00842826	0.00360118	SLC6A4/IL6/IL1B/COL3A1/SPP1	5
GO:0034695	response to prostaglandin E	2/59	23/18670	0.00238008	0.00842826	0.00360118	PPARG/AKT1	2
GO:0050995	negative regulation of lipid catabolic process	2/59	23/18670	0.00238008	0.00842826	0.00360118	AKT1/IL1B	2
GO:0051349	positive regulation of lyase activity	2/59	23/18670	0.00238008	0.00842826	0.00360118	NOS2/NOS3	2
GO:0045445	myoblast differentiation	3/59	84/18670	0.0023819	0.00842826	0.00360118	MAPK14/CXCL10/IGFBP3	3
GO:0046889	positive regulation of lipid biosynthetic process	3/59	84/18670	0.0023819	0.00842826	0.00360118	PTGS2/AKT1/IL1B	3
GO:0050890	cognition	5/59	296/18670	0.00240944	0.00851548	0.00363844	PTGS2/SLC6A4/CASP3/FOS/HIF1A	5
GO:0010950	positive regulation of endopeptidase activity	4/59	178/18670	0.00241653	0.00852007	0.00364041	PPARG/CYCS/F3/CASP1	4
GO:2001257	regulation of cation channel activity	4/59	178/18670	0.00241653	0.00852007	0.00364041	ADRB2/MMP9/CAV1/CCL2	4
GO:2001235	positive regulation of apoptotic signaling pathway	4/59	179/18670	0.002466	0.00868409	0.00371048	MMP9/SOD1/MAPK8/CAV1	4
GO:0050804	modulation of chemical synaptic transmission	6/59	436/18670	0.0024827	0.00873245	0.00373115	PTGS2/ADRB2/SLC6A4/IL1B/CCL2/PLAT	6
GO:0099177	regulation of trans-synaptic signaling	6/59	437/18670	0.00251116	0.00882203	0.00376942	PTGS2/ADRB2/SLC6A4/IL1B/CCL2/PLAT	6
GO:1905330	regulation of morphogenesis of an epithelium	4/59	180/18670	0.00251616	0.00882905	0.00377243	ESR1/VEGFA/STAT1/CXCL10	4
GO:0042058	regulation of epidermal growth factor receptor signaling pathway	3/59	86/18670	0.00254689	0.00892625	0.00381395	AKT1/MMP9/EGF	3
GO:0006164	purine nucleotide biosynthetic process	5/59	300/18670	0.00255332	0.00893815	0.00381904	NOS2/HIF1A/IL4/NOS3/PPARA	5
GO:0010288	response to lead ion	2/59	24/18670	0.00259119	0.00898523	0.00383916	PTGS2/CAT	2
GO:0010640	regulation of platelet-derived growth factor receptor signaling pathway	2/59	24/18670	0.00259119	0.00898523	0.00383916	F7/F3	2
GO:0034505	tooth mineralization	2/59	24/18670	0.00259119	0.00898523	0.00383916	COL1A1/PPARA	2
GO:0046697	decidualization	2/59	24/18670	0.00259119	0.00898523	0.00383916	PTGS2/SPP1	2
GO:0050996	positive regulation of lipid catabolic process	2/59	24/18670	0.00259119	0.00898523	0.00383916	IL1B/PPARA	2
GO:0060343	trabecula formation	2/59	24/18670	0.00259119	0.00898523	0.00383916	MMP2/COL1A1	2
GO:0071677	positive regulation of mononuclear cell migration	2/59	24/18670	0.00259119	0.00898523	0.00383916	SERPINE1/CXCL10	2
GO:2001026	regulation of endothelial cell chemotaxis	2/59	24/18670	0.00259119	0.00898523	0.00383916	VEGFA/KDR	2
GO:0009060	aerobic respiration	3/59	87/18670	0.00263197	0.00911591	0.00389499	HIF1A/CYCS/CAT	3
GO:0043123	positive regulation of I-kappaB kinase/NF-kappaB signaling	4/59	183/18670	0.00267086	0.00923973	0.0039479	AKT1/HMOX1/IL1B/CASP1	4
GO:0034103	regulation of tissue remodeling	3/59	88/18670	0.00271879	0.00935706	0.00399803	IL6/IL2/SPP1	3
GO:0050829	defense response to Gram-negative bacterium	3/59	88/18670	0.00271879	0.00935706	0.00399803	NOS2/IL6/SERPINE1	3
GO:0070098	chemokine-mediated signaling pathway	3/59	88/18670	0.00271879	0.00935706	0.00399803	HIF1A/CCL2/CXCL10	3
GO:1901888	regulation of cell junction assembly	3/59	88/18670	0.00271879	0.00935706	0.00399803	VEGFA/KDR/CAV1	3
GO:0043401	steroid hormone mediated signaling pathway	4/59	184/18670	0.00272384	0.00935706	0.00399803	NR3C2/ESR1/PPARG/PPARA	4
GO:0050864	regulation of B cell activation	4/59	184/18670	0.00272384	0.00935706	0.00399803	CASP3/IL4/IL6/IL2	4
GO:0046427	positive regulation of JAK-STAT cascade	3/59	89/18670	0.00280736	0.00953342	0.00407338	IL4/IL6/IL2	3
GO:0002053	positive regulation of mesenchymal cell proliferation	2/59	25/18670	0.0028108	0.00953342	0.00407338	VEGFA/STAT1	2
GO:0031639	plasminogen activation	2/59	25/18670	0.0028108	0.00953342	0.00407338	PLAT/SERPINE1	2
GO:0032461	positive regulation of protein oligomerization	2/59	25/18670	0.0028108	0.00953342	0.00407338	MMP1/MMP3	2
GO:0045830	positive regulation of isotype switching	2/59	25/18670	0.0028108	0.00953342	0.00407338	IL4/IL2	2
GO:0050901	leukocyte tethering or rolling	2/59	25/18670	0.0028108	0.00953342	0.00407338	SELE/VCAM1	2
GO:0051894	positive regulation of focal adhesion assembly	2/59	25/18670	0.0028108	0.00953342	0.00407338	VEGFA/KDR	2
GO:0060330	regulation of response to interferon-gamma	2/59	25/18670	0.0028108	0.00953342	0.00407338	PPARG/STAT1	2
GO:0060334	regulation of interferon-gamma-mediated signaling pathway	2/59	25/18670	0.0028108	0.00953342	0.00407338	PPARG/STAT1	2
GO:0090025	regulation of monocyte chemotaxis	2/59	25/18670	0.0028108	0.00953342	0.00407338	SERPINE1/CXCL10	2
GO:2000353	positive regulation of endothelial cell apoptotic process	2/59	25/18670	0.0028108	0.00953342	0.00407338	CCL2/CD40LG	2
GO:1901343	negative regulation of vasculature development	4/59	187/18670	0.00288713	0.00978102	0.00417918	PPARG/STAT1/SERPINE1/CXCL10	4
GO:0010717	regulation of epithelial to mesenchymal transition	3/59	90/18670	0.0028977	0.00978305	0.00418004	IL6/IL1B/COL1A1	3
GO:0042475	odontogenesis of dentin-containing tooth	3/59	90/18670	0.0028977	0.00978305	0.00418004	SCN5A/SERPINE1/PPARA	3
GO:0046849	bone remodeling	3/59	90/18670	0.0028977	0.00978305	0.00418004	ADRB2/IL6/SPP1	3
GO:0006367	transcription initiation from RNA polymerase II promoter	4/59	188/18670	0.00294302	0.00992467	0.00424056	NR3C2/ESR1/PPARG/PPARA	4
GO:0014909	smooth muscle cell migration	3/59	91/18670	0.00298981	0.0100594	0.00429813	PLAT/SERPINE1/IGFBP3	3
GO:0051899	membrane depolarization	3/59	91/18670	0.00298981	0.0100594	0.00429813	SCN5A/KDR/CAV1	3
GO:0006309	apoptotic DNA fragmentation	2/59	26/18670	0.00303887	0.010178	0.00434878	CASP3/IL6	2
GO:0022011	myelination in peripheral nervous system	2/59	26/18670	0.00303887	0.010178	0.00434878	AKT1/SOD1	2
GO:0032292	peripheral nervous system axon ensheathment	2/59	26/18670	0.00303887	0.010178	0.00434878	AKT1/SOD1	2
GO:0072539	T-helper 17 cell differentiation	2/59	26/18670	0.00303887	0.010178	0.00434878	IL6/IL2	2
GO:0072522	purine-containing compound biosynthetic process	5/59	313/18670	0.00306426	0.0102513	0.00438013	NOS2/HIF1A/IL4/NOS3/PPARA	5
GO:0045833	negative regulation of lipid metabolic process	3/59	92/18670	0.0030837	0.010293	0.00439793	AKT1/SOD1/IL1B	3
GO:1904894	positive regulation of STAT cascade	3/59	92/18670	0.0030837	0.010293	0.00439793	IL4/IL6/IL2	3
GO:0051961	negative regulation of nervous system development	5/59	315/18670	0.00314897	0.0104989	0.00448593	SLC6A4/IL6/IL1B/COL3A1/SPP1	5
GO:0003073	regulation of systemic arterial blood pressure	3/59	93/18670	0.00317939	0.0105645	0.00451393	ADRB2/ADRB1/NOS3	3
GO:0007589	body fluid secretion	3/59	93/18670	0.00317939	0.0105645	0.00451393	VEGFA/HIF1A/CAV1	3
GO:1901184	regulation of ERBB signaling pathway	3/59	93/18670	0.00317939	0.0105645	0.00451393	AKT1/MMP9/EGF	3
GO:0002377	immunoglobulin production	4/59	193/18670	0.00323361	0.0107142	0.0045779	IL4/IL6/IL2/CD40LG	4
GO:0007219	Notch signaling pathway	4/59	193/18670	0.00323361	0.0107142	0.0045779	AKT1/STAT1/EGF/NOS3	4
GO:0070371	ERK1 and ERK2 cascade	5/59	317/18670	0.00323537	0.0107142	0.0045779	KDR/ICAM1/EGF/IL1B/CCL2	5
GO:0002021	response to dietary excess	2/59	27/18670	0.00327533	0.010743	0.00459019	ADRB2/ADRB1	2
GO:0035902	response to immobilization stress	2/59	27/18670	0.00327533	0.010743	0.00459019	PPARG/FOS	2
GO:0046885	regulation of hormone biosynthetic process	2/59	27/18670	0.00327533	0.010743	0.00459019	HIF1A/IL1B	2
GO:0048143	astrocyte activation	2/59	27/18670	0.00327533	0.010743	0.00459019	IL6/IL1B	2
GO:0072378	blood coagulation, fibrin clot formation	2/59	27/18670	0.00327533	0.010743	0.00459019	F7/F3	2
GO:1901623	regulation of lymphocyte chemotaxis	2/59	27/18670	0.00327533	0.010743	0.00459019	CCL2/CXCL10	2
GO:1905563	negative regulation of vascular endothelial cell proliferation	2/59	27/18670	0.00327533	0.010743	0.00459019	PPARG/CCL2	2
GO:2000191	regulation of fatty acid transport	2/59	27/18670	0.00327533	0.010743	0.00459019	AKT1/IL1B	2
GO:0070167	regulation of biomineral tissue development	3/59	94/18670	0.00327689	0.010743	0.00459019	ADRB2/HIF1A/NOS3	3
GO:2000060	positive regulation of ubiquitin-dependent protein catabolic process	3/59	95/18670	0.00337621	0.0110563	0.00472405	AKT1/EGF/CAV1	3
GO:0071375	cellular response to peptide hormone stimulus	5/59	321/18670	0.00341328	0.0111652	0.00477061	PPARG/AKT1/STAT1/CAV1/IL1B	5
GO:0097327	response to antineoplastic agent	3/59	96/18670	0.00347736	0.0113448	0.00484735	F7/HMOX1/ICAM1	3
GO:2001169	regulation of ATP biosynthetic process	3/59	96/18670	0.00347736	0.0113448	0.00484735	HIF1A/IL4/PPARA	3
GO:0009749	response to glucose	4/59	197/18670	0.00347975	0.0113448	0.00484735	CASP3/HIF1A/ICAM1/RAF1	4
GO:0043254	regulation of protein complex assembly	6/59	467/18670	0.00348552	0.0113511	0.00485002	ESR1/VEGFA/MMP1/ICAM1/MMP3/RAF1	6
GO:0008209	androgen metabolic process	2/59	28/18670	0.00352014	0.0114259	0.00488199	ESR1/SPP1	2
GO:0009065	glutamine family amino acid catabolic process	2/59	28/18670	0.00352014	0.0114259	0.00488199	NOS2/NOS3	2
GO:1990776	response to angiotensin	2/59	28/18670	0.00352014	0.0114259	0.00488199	PTGS2/CAV1	2
GO:0031099	regeneration	4/59	198/18670	0.00354322	0.0114629	0.0048978	PPARG/F7/HMOX1/SPP1	4
GO:0046890	regulation of lipid biosynthetic process	4/59	198/18670	0.00354322	0.0114629	0.0048978	PTGS2/AKT1/SOD1/IL1B	4
GO:0072376	protein activation cascade	4/59	198/18670	0.00354322	0.0114629	0.0048978	F7/F3/IL1B/CRP	4
GO:0030316	osteoclast differentiation	3/59	97/18670	0.00358035	0.0115323	0.00492747	MAPK14/FOS/IL4	3
GO:0043255	regulation of carbohydrate biosynthetic process	3/59	97/18670	0.00358035	0.0115323	0.00492747	AKT1/EGF/PPARA	3
GO:1990868	response to chemokine	3/59	97/18670	0.00358035	0.0115323	0.00492747	HIF1A/CCL2/CXCL10	3
GO:1990869	cellular response to chemokine	3/59	97/18670	0.00358035	0.0115323	0.00492747	HIF1A/CCL2/CXCL10	3
GO:0009615	response to virus	5/59	326/18670	0.00364547	0.0117293	0.00501161	MAPK14/STAT1/IL6/IL1B/CXCL10	5
GO:0031341	regulation of cell killing	3/59	98/18670	0.00368519	0.0118441	0.00506068	NOS2/IL4/ICAM1	3
GO:0050769	positive regulation of neurogenesis	6/59	474/18670	0.00374867	0.0120091	0.00513118	PPARG/VEGFA/HIF1A/IL6/IL1B/IL2	6
GO:0014044	Schwann cell development	2/59	29/18670	0.00377324	0.0120091	0.00513118	AKT1/SOD1	2
GO:0031063	regulation of histone deacetylation	2/59	29/18670	0.00377324	0.0120091	0.00513118	VEGFA/MAPK8	2
GO:0060142	regulation of syncytium formation by plasma membrane fusion	2/59	29/18670	0.00377324	0.0120091	0.00513118	MAPK14/CXCL10	2
GO:0070102	interleukin-6-mediated signaling pathway	2/59	29/18670	0.00377324	0.0120091	0.00513118	STAT1/IL6	2
GO:0070229	negative regulation of lymphocyte apoptotic process	2/59	29/18670	0.00377324	0.0120091	0.00513118	HIF1A/IL2	2
GO:0072538	T-helper 17 type immune response	2/59	29/18670	0.00377324	0.0120091	0.00513118	IL6/IL2	2
GO:0072606	interleukin-8 secretion	2/59	29/18670	0.00377324	0.0120091	0.00513118	NOS2/CRP	2
GO:1900027	regulation of ruffle assembly	2/59	29/18670	0.00377324	0.0120091	0.00513118	ICAM1/CAV1	2
GO:0001655	urogenital system development	5/59	330/18670	0.00383926	0.0121929	0.00520969	ESR1/VEGFA/MMP9/CAT/STAT1	5
GO:0042742	defense response to bacterium	5/59	330/18670	0.00383926	0.0121929	0.00520969	NOS2/MPO/IL6/SERPINE1/CRP	5
GO:0030278	regulation of ossification	4/59	203/18670	0.00387245	0.012285	0.00524907	ADRB2/MAPK14/HIF1A/IL6	4
GO:0070498	interleukin-1-mediated signaling pathway	3/59	100/18670	0.00390047	0.0123606	0.00528136	IL6/IL1B/IL1A	3
GO:0015849	organic acid transport	5/59	333/18670	0.00398938	0.0126152	0.00539014	PPARG/NOS2/AKT1/IL1B/PPARA	5
GO:0046942	carboxylic acid transport	5/59	333/18670	0.00398938	0.0126152	0.00539014	PPARG/NOS2/AKT1/IL1B/PPARA	5
GO:0002027	regulation of heart rate	3/59	101/18670	0.00401093	0.0126697	0.00541344	SCN5A/ADRB1/CAV1	3
GO:0001782	B cell homeostasis	2/59	30/18670	0.00403458	0.01269	0.00542209	CASP3/HIF1A	2
GO:0032743	positive regulation of interleukin-2 production	2/59	30/18670	0.00403458	0.01269	0.00542209	IL1B/IL1A	2
GO:0042759	long-chain fatty acid biosynthetic process	2/59	30/18670	0.00403458	0.01269	0.00542209	PTGS2/ALOX5	2
GO:0070168	negative regulation of biomineral tissue development	2/59	30/18670	0.00403458	0.01269	0.00542209	HIF1A/NOS3	2
GO:0043312	neutrophil degranulation	6/59	485/18670	0.00419176	0.0131703	0.00562732	MAPK14/MMP9/MPO/CAT/OLR1/ALOX5	6
GO:0090276	regulation of peptide hormone secretion	4/59	208/18670	0.00422188	0.0132507	0.0056617	NOS2/DPP4/HIF1A/IL1B	4
GO:0034766	negative regulation of ion transmembrane transport	3/59	103/18670	0.00423753	0.0132857	0.00567664	AKT1/MMP9/CAV1	3
GO:0006006	glucose metabolic process	4/59	209/18670	0.00429423	0.0133522	0.00570506	MAPK14/AKT1/PPARA/IGFBP3	4
GO:0001963	synaptic transmission, dopaminergic	2/59	31/18670	0.0043041	0.0133522	0.00570506	PTGS2/SLC6A4	2
GO:0002724	regulation of T cell cytokine production	2/59	31/18670	0.0043041	0.0133522	0.00570506	IL6/IL1B	2
GO:0010165	response to X-ray	2/59	31/18670	0.0043041	0.0133522	0.00570506	CASP3/THBD	2
GO:0010543	regulation of platelet activation	2/59	31/18670	0.0043041	0.0133522	0.00570506	NOS3/THBD	2
GO:0034694	response to prostaglandin	2/59	31/18670	0.0043041	0.0133522	0.00570506	PPARG/AKT1	2
GO:0035767	endothelial cell chemotaxis	2/59	31/18670	0.0043041	0.0133522	0.00570506	VEGFA/KDR	2
GO:0071880	adenylate cyclase-activating adrenergic receptor signaling pathway	2/59	31/18670	0.0043041	0.0133522	0.00570506	ADRB2/ADRB1	2
GO:1902895	positive regulation of pri-miRNA transcription by RNA polymerase II	2/59	31/18670	0.0043041	0.0133522	0.00570506	FOS/HIF1A	2
GO:1903393	positive regulation of adherens junction organization	2/59	31/18670	0.0043041	0.0133522	0.00570506	VEGFA/KDR	2
GO:0002283	neutrophil activation involved in immune response	6/59	488/18670	0.00431909	0.0133846	0.0057189	MAPK14/MMP9/MPO/CAT/OLR1/ALOX5	6
GO:0014812	muscle cell migration	3/59	104/18670	0.00435369	0.0134494	0.00574657	PLAT/SERPINE1/IGFBP3	3
GO:0030593	neutrophil chemotaxis	3/59	104/18670	0.00435369	0.0134494	0.00574657	IL1B/CCL2/CXCL10	3
GO:0046822	regulation of nucleocytoplasmic transport	3/59	104/18670	0.00435369	0.0134494	0.00574657	PTGS2/MAPK14/IL1B	3
GO:0007009	plasma membrane organization	3/59	105/18670	0.00447177	0.0137852	0.00589006	AKT1/SOD1/CAV1	3
GO:0008593	regulation of Notch signaling pathway	3/59	105/18670	0.00447177	0.0137852	0.00589006	AKT1/EGF/NOS3	3
GO:0001975	response to amphetamine	2/59	32/18670	0.00458175	0.0140215	0.00599102	SOD1/ICAM1	2
GO:0042744	hydrogen peroxide catabolic process	2/59	32/18670	0.00458175	0.0140215	0.00599102	MPO/CAT	2
GO:0051968	positive regulation of synaptic transmission, glutamatergic	2/59	32/18670	0.00458175	0.0140215	0.00599102	PTGS2/CCL2	2
GO:0055094	response to lipoprotein particle	2/59	32/18670	0.00458175	0.0140215	0.00599102	PPARG/AKT1	2
GO:0060325	face morphogenesis	2/59	32/18670	0.00458175	0.0140215	0.00599102	MMP2/COL1A1	2
GO:0071295	cellular response to vitamin	2/59	32/18670	0.00458175	0.0140215	0.00599102	PPARG/COL1A1	2
GO:1900745	positive regulation of p38MAPK cascade	2/59	32/18670	0.00458175	0.0140215	0.00599102	VEGFA/IL1B	2
GO:0002286	T cell activation involved in immune response	3/59	106/18670	0.00459178	0.0140376	0.00599789	ICAM1/IL6/IL2	3
GO:0007254	JNK cascade	4/59	214/18670	0.00466864	0.014243	0.00608566	AKT1/MAPK8/IL1B/CD40LG	4
GO:0045732	positive regulation of protein catabolic process	4/59	214/18670	0.00466864	0.014243	0.00608566	AKT1/EGF/CAV1/IL1B	4
GO:0043502	regulation of muscle adaptation	3/59	107/18670	0.00471373	0.0143508	0.00613172	SCN5A/NOS3/PPARA	3
GO:0062014	negative regulation of small molecule metabolic process	3/59	107/18670	0.00471373	0.0143508	0.00613172	AKT1/SOD1/PPARA	3
GO:0010810	regulation of cell-substrate adhesion	4/59	215/18670	0.00474608	0.0144343	0.00616742	VEGFA/KDR/SERPINE1/COL1A1	4
GO:0042119	neutrophil activation	6/59	498/18670	0.00476431	0.0144748	0.00618473	MAPK14/MMP9/MPO/CAT/OLR1/ALOX5	6
GO:0032869	cellular response to insulin stimulus	4/59	216/18670	0.00482437	0.0146223	0.00624774	PPARG/AKT1/STAT1/IL1B	4
GO:0032526	response to retinoic acid	3/59	108/18670	0.00483762	0.0146223	0.00624774	SLC6A4/PPARG/COL1A1	3
GO:0046916	cellular transition metal ion homeostasis	3/59	108/18670	0.00483762	0.0146223	0.00624774	HIF1A/SOD1/HMOX1	3
GO:1904659	glucose transmembrane transport	3/59	108/18670	0.00483762	0.0146223	0.00624774	MAPK14/AKT1/IL1B	3
GO:0010039	response to iron ion	2/59	33/18670	0.00486748	0.0146223	0.00624774	HIF1A/HMOX1	2
GO:0010464	regulation of mesenchymal cell proliferation	2/59	33/18670	0.00486748	0.0146223	0.00624774	VEGFA/STAT1	2
GO:0016242	negative regulation of macroautophagy	2/59	33/18670	0.00486748	0.0146223	0.00624774	AKT1/HMOX1	2
GO:0036003	positive regulation of transcription from RNA polymerase II promoter in response to stress	2/59	33/18670	0.00486748	0.0146223	0.00624774	VEGFA/HIF1A	2
GO:0045191	regulation of isotype switching	2/59	33/18670	0.00486748	0.0146223	0.00624774	IL4/IL2	2
GO:0048011	neurotrophin TRK receptor signaling pathway	2/59	33/18670	0.00486748	0.0146223	0.00624774	CASP3/RAF1	2
GO:1902692	regulation of neuroblast proliferation	2/59	33/18670	0.00486748	0.0146223	0.00624774	VEGFA/HIF1A	2
GO:0001676	long-chain fatty acid metabolic process	3/59	109/18670	0.00496348	0.0148955	0.00636446	PTGS1/PTGS2/ALOX5	3
GO:0006814	sodium ion transport	4/59	218/18670	0.00498357	0.0149254	0.00637722	SCN5A/ADRB2/AKT1/NOS3	4
GO:0016064	immunoglobulin mediated immune response	4/59	218/18670	0.00498357	0.0149254	0.00637722	IL4/IL2/CRP/CD40LG	4
GO:0000737	DNA catabolic process, endonucleolytic	2/59	34/18670	0.00516125	0.0153637	0.00656451	CASP3/IL6	2
GO:0010765	positive regulation of sodium ion transport	2/59	34/18670	0.00516125	0.0153637	0.00656451	SCN5A/AKT1	2
GO:0032660	regulation of interleukin-17 production	2/59	34/18670	0.00516125	0.0153637	0.00656451	IL6/IL2	2
GO:0043276	anoikis	2/59	34/18670	0.00516125	0.0153637	0.00656451	AKT1/CAV1	2
GO:0071402	cellular response to lipoprotein particle stimulus	2/59	34/18670	0.00516125	0.0153637	0.00656451	PPARG/AKT1	2
GO:0071875	adrenergic receptor signaling pathway	2/59	34/18670	0.00516125	0.0153637	0.00656451	ADRB2/ADRB1	2
GO:0019724	B cell mediated immunity	4/59	221/18670	0.00522894	0.0155495	0.00664389	IL4/IL2/CRP/CD40LG	4
GO:0006959	humoral immune response	5/59	356/18670	0.00528361	0.0156962	0.00670659	IL6/IL1B/CCL2/CRP/CXCL10	5
GO:0002065	columnar/cuboidal epithelial cell differentiation	3/59	112/18670	0.00535287	0.0158221	0.00676039	HIF1A/SOD1/SERPINE1	3
GO:0008645	hexose transmembrane transport	3/59	112/18670	0.00535287	0.0158221	0.00676039	MAPK14/AKT1/IL1B	3
GO:0032411	positive regulation of transporter activity	3/59	112/18670	0.00535287	0.0158221	0.00676039	ADRB2/PON1/CCL2	3
GO:0043279	response to alkaloid	3/59	112/18670	0.00535287	0.0158221	0.00676039	CASP3/PPARG/ICAM1	3
GO:1903510	mucopolysaccharide metabolic process	3/59	112/18670	0.00535287	0.0158221	0.00676039	AKT1/EGF/IL1B	3
GO:0030262	apoptotic nuclear changes	2/59	35/18670	0.00546298	0.016067	0.00686499	CASP3/IL6	2
GO:0032735	positive regulation of interleukin-12 production	2/59	35/18670	0.00546298	0.016067	0.00686499	MAPK14/CD40LG	2
GO:0042092	type 2 immune response	2/59	35/18670	0.00546298	0.016067	0.00686499	IL4/IL6	2
GO:0060251	regulation of glial cell proliferation	2/59	35/18670	0.00546298	0.016067	0.00686499	IL6/IL1B	2
GO:0071312	cellular response to alkaloid	2/59	35/18670	0.00546298	0.016067	0.00686499	CASP3/ICAM1	2
GO:0006936	muscle contraction	5/59	360/18670	0.00553584	0.016265	0.00694961	PTGS2/SCN5A/ADRB2/SOD1/CAV1	5
GO:0015749	monosaccharide transmembrane transport	3/59	114/18670	0.0056224	0.01647	0.0070372	MAPK14/AKT1/IL1B	3
GO:0030282	bone mineralization	3/59	114/18670	0.0056224	0.01647	0.0070372	PTGS2/ADRB2/HIF1A	3
GO:0042752	regulation of circadian rhythm	3/59	114/18670	0.0056224	0.01647	0.0070372	PPARG/MAPK8/PPARA	3
GO:0030111	regulation of Wnt signaling pathway	5/59	363/18670	0.00573054	0.0167701	0.00716543	ESR1/MAPK14/EGF/CAV1/COL1A1	5
GO:0030224	monocyte differentiation	2/59	36/18670	0.00577265	0.0167931	0.00717528	PPARG/VEGFA	2
GO:0042554	superoxide anion generation	2/59	36/18670	0.00577265	0.0167931	0.00717528	SOD1/CRP	2
GO:0071634	regulation of transforming growth factor beta production	2/59	36/18670	0.00577265	0.0167931	0.00717528	PTGS2/HIF1A	2
GO:0090322	regulation of superoxide metabolic process	2/59	36/18670	0.00577265	0.0167931	0.00717528	SOD1/CRP	2
GO:1903131	mononuclear cell differentiation	2/59	36/18670	0.00577265	0.0167931	0.00717528	PPARG/VEGFA	2
GO:2001171	positive regulation of ATP biosynthetic process	2/59	36/18670	0.00577265	0.0167931	0.00717528	HIF1A/IL4	2
GO:0006066	alcohol metabolic process	5/59	364/18670	0.00579651	0.0168459	0.00719783	PON1/SOD1/CAT/IL4/IL1B	5
GO:0051054	positive regulation of DNA metabolic process	4/59	228/18670	0.00583274	0.0169345	0.00723567	AKT1/IL4/IL6/IL2	4
GO:0034219	carbohydrate transmembrane transport	3/59	116/18670	0.00589997	0.017096	0.00730466	MAPK14/AKT1/IL1B	3
GO:1900180	regulation of protein localization to nucleus	3/59	116/18670	0.00589997	0.017096	0.00730466	PTGS2/MAPK14/AKT1	3
GO:0010906	regulation of glucose metabolic process	3/59	117/18670	0.00604178	0.0174242	0.0074449	AKT1/PPARA/IGFBP3	3
GO:0051153	regulation of striated muscle cell differentiation	3/59	117/18670	0.00604178	0.0174242	0.0074449	MAPK14/PPARA/CXCL10	3
GO:0002714	positive regulation of B cell mediated immunity	2/59	37/18670	0.00609018	0.0174242	0.0074449	IL4/IL2	2
GO:0002891	positive regulation of immunoglobulin mediated immune response	2/59	37/18670	0.00609018	0.0174242	0.0074449	IL4/IL2	2
GO:0006921	cellular component disassembly involved in execution phase of apoptosis	2/59	37/18670	0.00609018	0.0174242	0.0074449	CASP3/IL6	2
GO:0014037	Schwann cell differentiation	2/59	37/18670	0.00609018	0.0174242	0.0074449	AKT1/SOD1	2
GO:0014912	negative regulation of smooth muscle cell migration	2/59	37/18670	0.00609018	0.0174242	0.0074449	SERPINE1/IGFBP3	2
GO:0032885	regulation of polysaccharide biosynthetic process	2/59	37/18670	0.00609018	0.0174242	0.0074449	AKT1/EGF	2
GO:0042307	positive regulation of protein import into nucleus	2/59	37/18670	0.00609018	0.0174242	0.0074449	PTGS2/MAPK14	2
GO:0046006	regulation of activated T cell proliferation	2/59	37/18670	0.00609018	0.0174242	0.0074449	CASP3/IL2	2
GO:0050691	regulation of defense response to virus by host	2/59	37/18670	0.00609018	0.0174242	0.0074449	STAT1/IL1B	2
GO:0060323	head morphogenesis	2/59	37/18670	0.00609018	0.0174242	0.0074449	MMP2/COL1A1	2
GO:0071542	dopaminergic neuron differentiation	2/59	37/18670	0.00609018	0.0174242	0.0074449	VEGFA/HIF1A	2
GO:0006909	phagocytosis	5/59	369/18670	0.00613442	0.0175337	0.0074917	PPARG/SOD1/IL1B/CCL2/CRP	5
GO:1990266	neutrophil migration	3/59	118/18670	0.00618562	0.0176629	0.00754691	IL1B/CCL2/CXCL10	3
GO:0042445	hormone metabolic process	4/59	232/18670	0.00619786	0.0176807	0.00755451	ESR1/HIF1A/IL1B/SPP1	4
GO:0001952	regulation of cell-matrix adhesion	3/59	119/18670	0.00633151	0.0180096	0.00769504	VEGFA/KDR/SERPINE1	3
GO:0007173	epidermal growth factor receptor signaling pathway	3/59	119/18670	0.00633151	0.0180096	0.00769504	AKT1/MMP9/EGF	3
GO:0051193	regulation of cofactor metabolic process	3/59	119/18670	0.00633151	0.0180096	0.00769504	HIF1A/MMP3/PPARA	3
GO:0032350	regulation of hormone metabolic process	2/59	38/18670	0.00641554	0.018074	0.00772256	HIF1A/IL1B	2
GO:0032620	interleukin-17 production	2/59	38/18670	0.00641554	0.018074	0.00772256	IL6/IL2	2
GO:0046326	positive regulation of glucose import	2/59	38/18670	0.00641554	0.018074	0.00772256	MAPK14/AKT1	2
GO:0048009	insulin-like growth factor receptor signaling pathway	2/59	38/18670	0.00641554	0.018074	0.00772256	AKT1/IGFBP3	2
GO:0048246	macrophage chemotaxis	2/59	38/18670	0.00641554	0.018074	0.00772256	MAPK14/CCL2	2
GO:0060416	response to growth hormone	2/59	38/18670	0.00641554	0.018074	0.00772256	AKT1/F7	2
GO:0071604	transforming growth factor beta production	2/59	38/18670	0.00641554	0.018074	0.00772256	PTGS2/HIF1A	2
GO:0086005	ventricular cardiac muscle cell action potential	2/59	38/18670	0.00641554	0.018074	0.00772256	SCN5A/CAV1	2
GO:0086091	regulation of heart rate by cardiac conduction	2/59	38/18670	0.00641554	0.018074	0.00772256	SCN5A/CAV1	2
GO:1904706	negative regulation of vascular smooth muscle cell proliferation	2/59	38/18670	0.00641554	0.018074	0.00772256	PPARG/HMOX1	2
GO:1903052	positive regulation of proteolysis involved in cellular protein catabolic process	3/59	120/18670	0.00647943	0.0181902	0.00777219	AKT1/EGF/CAV1	3
GO:0006469	negative regulation of protein kinase activity	4/59	235/18670	0.00648149	0.0181902	0.00777219	CASP3/AKT1/CAV1/IL1B	4
GO:0009755	hormone-mediated signaling pathway	4/59	235/18670	0.00648149	0.0181902	0.00777219	NR3C2/ESR1/PPARG/PPARA	4
GO:0046777	protein autophosphorylation	4/59	235/18670	0.00648149	0.0181902	0.00777219	AKT1/VEGFA/KDR/CAV1	4
GO:0043618	regulation of transcription from RNA polymerase II promoter in response to stress	3/59	121/18670	0.00662941	0.0185699	0.00793445	VEGFA/HIF1A/HMOX1	3
GO:0046718	viral entry into host cell	3/59	121/18670	0.00662941	0.0185699	0.00793445	DPP4/ICAM1/CAV1	3
GO:0032872	regulation of stress-activated MAPK cascade	4/59	237/18670	0.0066753	0.0186807	0.00798177	AKT1/VEGFA/IL1B/CD40LG	4
GO:0002251	organ or tissue specific immune response	2/59	39/18670	0.00674867	0.0187435	0.0080086	NOS2/IL6	2
GO:0010874	regulation of cholesterol efflux	2/59	39/18670	0.00674867	0.0187435	0.0080086	PON1/EGF	2
GO:0038179	neurotrophin signaling pathway	2/59	39/18670	0.00674867	0.0187435	0.0080086	CASP3/RAF1	2
GO:0045911	positive regulation of DNA recombination	2/59	39/18670	0.00674867	0.0187435	0.0080086	IL4/IL2	2
GO:0060306	regulation of membrane repolarization	2/59	39/18670	0.00674867	0.0187435	0.0080086	SCN5A/CAV1	2
GO:0060969	negative regulation of gene silencing	2/59	39/18670	0.00674867	0.0187435	0.0080086	ESR1/PPARG	2
GO:1904591	positive regulation of protein import	2/59	39/18670	0.00674867	0.0187435	0.0080086	PTGS2/MAPK14	2
GO:2000648	positive regulation of stem cell proliferation	2/59	39/18670	0.00674867	0.0187435	0.0080086	VEGFA/HIF1A	2
GO:0030258	lipid modification	4/59	238/18670	0.00677364	0.0187774	0.00802309	PPARG/MAPK14/AKT1/PPARA	4
GO:0051607	defense response to virus	4/59	238/18670	0.00677364	0.0187774	0.00802309	STAT1/IL6/IL1B/CXCL10	4
GO:1903578	regulation of ATP metabolic process	3/59	122/18670	0.00678146	0.0187814	0.00802479	HIF1A/IL4/PPARA	3
GO:0070302	regulation of stress-activated protein kinase signaling cascade	4/59	239/18670	0.00687293	0.0190168	0.0081254	AKT1/VEGFA/IL1B/CD40LG	4
GO:0051928	positive regulation of calcium ion transport	3/59	123/18670	0.00693556	0.0191721	0.00819175	CAV1/CCL2/CXCL10	3
GO:0030217	T cell differentiation	4/59	240/18670	0.00697319	0.019258	0.00822845	SOD1/IL4/IL6/IL2	4
GO:0042176	regulation of protein catabolic process	5/59	381/18670	0.00700182	0.019319	0.0082545	NOS2/AKT1/EGF/CAV1/IL1B	5
GO:0042036	negative regulation of cytokine biosynthetic process	2/59	40/18670	0.00708951	0.0194215	0.0082983	IL4/IL6	2
GO:0042596	fear response	2/59	40/18670	0.00708951	0.0194215	0.0082983	ADRB1/DPP4	2
GO:0045124	regulation of bone resorption	2/59	40/18670	0.00708951	0.0194215	0.0082983	IL6/SPP1	2
GO:0046621	negative regulation of organ growth	2/59	40/18670	0.00708951	0.0194215	0.0082983	SLC6A4/PPARA	2
GO:0071470	cellular response to osmotic stress	2/59	40/18670	0.00708951	0.0194215	0.0082983	PTGS2/CASP3	2
GO:2000008	regulation of protein localization to cell surface	2/59	40/18670	0.00708951	0.0194215	0.0082983	AKT1/EGF	2
GO:0008637	apoptotic mitochondrial changes	3/59	124/18670	0.00709175	0.0194215	0.0082983	AKT1/MMP9/MAPK8	3
GO:0014013	regulation of gliogenesis	3/59	124/18670	0.00709175	0.0194215	0.0082983	PPARG/IL6/IL1B	3
GO:0018107	peptidyl-threonine phosphorylation	3/59	126/18670	0.00741036	0.0202007	0.00863124	AKT1/MAPK8/EGF	3
GO:0006308	DNA catabolic process	2/59	41/18670	0.00743803	0.0202007	0.00863124	CASP3/IL6	2
GO:0007520	myoblast fusion	2/59	41/18670	0.00743803	0.0202007	0.00863124	MAPK14/CXCL10	2
GO:0030890	positive regulation of B cell proliferation	2/59	41/18670	0.00743803	0.0202007	0.00863124	IL4/IL2	2
GO:0043267	negative regulation of potassium ion transport	2/59	41/18670	0.00743803	0.0202007	0.00863124	CAV1/NOS3	2
GO:0050798	activated T cell proliferation	2/59	41/18670	0.00743803	0.0202007	0.00863124	CASP3/IL2	2
GO:0090279	regulation of calcium ion import	2/59	41/18670	0.00743803	0.0202007	0.00863124	EGF/CCL2	2
GO:0097178	ruffle assembly	2/59	41/18670	0.00743803	0.0202007	0.00863124	ICAM1/CAV1	2
GO:1903053	regulation of extracellular matrix organization	2/59	41/18670	0.00743803	0.0202007	0.00863124	DPP4/IL6	2
GO:0035270	endocrine system development	3/59	127/18670	0.00757281	0.0205289	0.00877145	AKT1/IL6/RAF1	3
GO:0043620	regulation of DNA-templated transcription in response to stress	3/59	127/18670	0.00757281	0.0205289	0.00877145	VEGFA/HIF1A/HMOX1	3
GO:0045787	positive regulation of cell cycle	5/59	389/18670	0.00762583	0.0206536	0.00882474	SLC6A4/AKT1/EGF/IL1B/IL1A	5
GO:0014706	striated muscle tissue development	5/59	390/18670	0.00770648	0.0208528	0.00890987	MAPK14/VEGFA/FOS/CAV1/PPARA	5
GO:0010907	positive regulation of glucose metabolic process	2/59	42/18670	0.00779417	0.0210514	0.00899472	AKT1/PPARA	2
GO:0051154	negative regulation of striated muscle cell differentiation	2/59	42/18670	0.00779417	0.0210514	0.00899472	PPARA/CXCL10	2
GO:0006352	DNA-templated transcription, initiation	4/59	249/18670	0.00791942	0.021331	0.00911418	NR3C2/ESR1/PPARG/PPARA	4
GO:0019318	hexose metabolic process	4/59	249/18670	0.00791942	0.021331	0.00911418	MAPK14/AKT1/PPARA/IGFBP3	4
GO:0071560	cellular response to transforming growth factor beta stimulus	4/59	249/18670	0.00791942	0.021331	0.00911418	FOS/CAV1/COL1A1/COL3A1	4
GO:0003231	cardiac ventricle development	3/59	130/18670	0.00807277	0.0217242	0.00928218	SCN5A/HIF1A/NOS3	3
GO:0021537	telencephalon development	4/59	251/18670	0.00814061	0.0218136	0.0093204	SCN5A/CASP3/HIF1A/COL3A1	4
GO:0010863	positive regulation of phospholipase C activity	2/59	43/18670	0.00815788	0.0218136	0.0093204	ESR1/SELE	2
GO:0032459	regulation of protein oligomerization	2/59	43/18670	0.00815788	0.0218136	0.0093204	MMP1/MMP3	2
GO:0032881	regulation of polysaccharide metabolic process	2/59	43/18670	0.00815788	0.0218136	0.0093204	AKT1/EGF	2
GO:0045746	negative regulation of Notch signaling pathway	2/59	43/18670	0.00815788	0.0218136	0.0093204	AKT1/EGF	2
GO:0071364	cellular response to epidermal growth factor stimulus	2/59	43/18670	0.00815788	0.0218136	0.0093204	AKT1/COL1A1	2
GO:0086004	regulation of cardiac muscle cell contraction	2/59	43/18670	0.00815788	0.0218136	0.0093204	SCN5A/CAV1	2
GO:0030183	B cell differentiation	3/59	131/18670	0.00824366	0.022003	0.00940132	IL4/VCAM1/CD40LG	3
GO:0055076	transition metal ion homeostasis	3/59	131/18670	0.00824366	0.022003	0.00940132	HIF1A/SOD1/HMOX1	3
GO:0010463	mesenchymal cell proliferation	2/59	44/18670	0.00852911	0.0225604	0.00963946	VEGFA/STAT1	2
GO:0010828	positive regulation of glucose transmembrane transport	2/59	44/18670	0.00852911	0.0225604	0.00963946	MAPK14/AKT1	2
GO:0014002	astrocyte development	2/59	44/18670	0.00852911	0.0225604	0.00963946	IL6/IL1B	2
GO:0030225	macrophage differentiation	2/59	44/18670	0.00852911	0.0225604	0.00963946	VEGFA/MMP9	2
GO:0032965	regulation of collagen biosynthetic process	2/59	44/18670	0.00852911	0.0225604	0.00963946	PPARG/IL6	2
GO:0034105	positive regulation of tissue remodeling	2/59	44/18670	0.00852911	0.0225604	0.00963946	IL2/SPP1	2
GO:0035850	epithelial cell differentiation involved in kidney development	2/59	44/18670	0.00852911	0.0225604	0.00963946	MMP9/STAT1	2
GO:0038084	vascular endothelial growth factor signaling pathway	2/59	44/18670	0.00852911	0.0225604	0.00963946	VEGFA/KDR	2
GO:0045601	regulation of endothelial cell differentiation	2/59	44/18670	0.00852911	0.0225604	0.00963946	VEGFA/IL1B	2
GO:0090311	regulation of protein deacetylation	2/59	44/18670	0.00852911	0.0225604	0.00963946	VEGFA/MAPK8	2
GO:0071333	cellular response to glucose stimulus	3/59	133/18670	0.00859181	0.0226942	0.00969663	HIF1A/ICAM1/RAF1	3
GO:0071559	response to transforming growth factor beta	4/59	255/18670	0.00859511	0.0226942	0.00969663	FOS/CAV1/COL1A1/COL3A1	4
GO:0007187	G protein-coupled receptor signaling pathway, coupled to cyclic nucleotide second messenger	4/59	256/18670	0.00871128	0.0229803	0.00981888	ADRB2/ADRB1/CCL2/CXCL10	4
GO:0018210	peptidyl-threonine modification	3/59	134/18670	0.00876909	0.0230296	0.00983996	AKT1/MAPK8/EGF	3
GO:0030260	entry into host cell	3/59	134/18670	0.00876909	0.0230296	0.00983996	DPP4/ICAM1/CAV1	3
GO:0044409	entry into host	3/59	134/18670	0.00876909	0.0230296	0.00983996	DPP4/ICAM1/CAV1	3
GO:0051806	entry into cell of other organism involved in symbiotic interaction	3/59	134/18670	0.00876909	0.0230296	0.00983996	DPP4/ICAM1/CAV1	3
GO:0051828	entry into other organism involved in symbiotic interaction	3/59	134/18670	0.00876909	0.0230296	0.00983996	DPP4/ICAM1/CAV1	3
GO:0033673	negative regulation of kinase activity	4/59	257/18670	0.00882848	0.0231649	0.00989777	CASP3/AKT1/CAV1/IL1B	4
GO:0031018	endocrine pancreas development	2/59	45/18670	0.00890781	0.0232488	0.00993359	AKT1/IL6	2
GO:0032309	icosanoid secretion	2/59	45/18670	0.00890781	0.0232488	0.00993359	NOS2/IL1B	2
GO:0032570	response to progesterone	2/59	45/18670	0.00890781	0.0232488	0.00993359	FOS/CAV1	2
GO:0035987	endodermal cell differentiation	2/59	45/18670	0.00890781	0.0232488	0.00993359	MMP9/MMP2	2
GO:0048538	thymus development	2/59	45/18670	0.00890781	0.0232488	0.00993359	SOD1/RAF1	2
GO:1900274	regulation of phospholipase C activity	2/59	45/18670	0.00890781	0.0232488	0.00993359	ESR1/SELE	2
GO:0071331	cellular response to hexose stimulus	3/59	135/18670	0.00894851	0.0233343	0.00997014	HIF1A/ICAM1/RAF1	3
GO:0071326	cellular response to monosaccharide stimulus	3/59	136/18670	0.00913008	0.0237867	0.0101634	HIF1A/ICAM1/RAF1	3
GO:0032412	regulation of ion transmembrane transporter activity	4/59	260/18670	0.00918627	0.0239119	0.0102169	ADRB2/MMP9/CAV1/CCL2	4
GO:0014075	response to amine	2/59	46/18670	0.00929393	0.0240434	0.0102731	SOD1/ICAM1	2
GO:0032369	negative regulation of lipid transport	2/59	46/18670	0.00929393	0.0240434	0.0102731	AKT1/EGF	2
GO:0033628	regulation of cell adhesion mediated by integrin	2/59	46/18670	0.00929393	0.0240434	0.0102731	DPP4/SERPINE1	2
GO:0051339	regulation of lyase activity	2/59	46/18670	0.00929393	0.0240434	0.0102731	NOS2/NOS3	2
GO:0060443	mammary gland morphogenesis	2/59	46/18670	0.00929393	0.0240434	0.0102731	ESR1/CAV1	2
GO:1900015	regulation of cytokine production involved in inflammatory response	2/59	46/18670	0.00929393	0.0240434	0.0102731	MAPK14/NOS2	2
GO:1903587	regulation of blood vessel endothelial cell proliferation involved in sprouting angiogenesis	2/59	46/18670	0.00929393	0.0240434	0.0102731	VEGFA/HMOX1	2
GO:0034504	protein localization to nucleus	4/59	262/18670	0.00942999	0.0243739	0.0104143	PTGS2/MAPK14/AKT1/COL1A1	4
GO:0031330	negative regulation of cellular catabolic process	4/59	264/18670	0.00967791	0.0248006	0.0105966	MAPK14/AKT1/HMOX1/PPARA	4
GO:0031952	regulation of protein autophosphorylation	2/59	47/18670	0.00968743	0.0248006	0.0105966	VEGFA/CAV1	2
GO:0061383	trabecula morphogenesis	2/59	47/18670	0.00968743	0.0248006	0.0105966	MMP2/COL1A1	2
GO:0070231	T cell apoptotic process	2/59	47/18670	0.00968743	0.0248006	0.0105966	AKT1/HIF1A	2
GO:0070849	response to epidermal growth factor	2/59	47/18670	0.00968743	0.0248006	0.0105966	AKT1/COL1A1	2
GO:1900744	regulation of p38MAPK cascade	2/59	47/18670	0.00968743	0.0248006	0.0105966	VEGFA/IL1B	2
GO:1903115	regulation of actin filament-based movement	2/59	47/18670	0.00968743	0.0248006	0.0105966	SCN5A/CAV1	2
GO:1903580	positive regulation of ATP metabolic process	2/59	47/18670	0.00968743	0.0248006	0.0105966	HIF1A/IL4	2
GO:2000107	negative regulation of leukocyte apoptotic process	2/59	47/18670	0.00968743	0.0248006	0.0105966	HIF1A/IL2	2
GO:0007189	adenylate cyclase-activating G protein-coupled receptor signaling pathway	3/59	139/18670	0.00968773	0.0248006	0.0105966	ADRB2/ADRB1/CXCL10	3
GO:0045580	regulation of T cell differentiation	3/59	139/18670	0.00968773	0.0248006	0.0105966	SOD1/IL4/IL2	3
GO:0060078	regulation of postsynaptic membrane potential	3/59	140/18670	0.00987794	0.0252217	0.0107766	ADRB2/ADRB1/AKT1	3
GO:0072073	kidney epithelium development	3/59	140/18670	0.00987794	0.0252217	0.0107766	VEGFA/CAT/STAT1	3
GO:1903364	positive regulation of cellular protein catabolic process	3/59	140/18670	0.00987794	0.0252217	0.0107766	AKT1/EGF/CAV1	3
GO:0002711	positive regulation of T cell mediated immunity	2/59	48/18670	0.0100882	0.0256254	0.0109491	IL6/IL1B	2
GO:0046850	regulation of bone remodeling	2/59	48/18670	0.0100882	0.0256254	0.0109491	IL6/SPP1	2
GO:0072604	interleukin-6 secretion	2/59	48/18670	0.0100882	0.0256254	0.0109491	NOS2/IL1B	2
GO:0090199	regulation of release of cytochrome c from mitochondria	2/59	48/18670	0.0100882	0.0256254	0.0109491	AKT1/MMP9	2
GO:0101023	vascular endothelial cell proliferation	2/59	48/18670	0.0100882	0.0256254	0.0109491	PPARG/CCL2	2
GO:1905562	regulation of vascular endothelial cell proliferation	2/59	48/18670	0.0100882	0.0256254	0.0109491	PPARG/CCL2	2
GO:0022898	regulation of transmembrane transporter activity	4/59	268/18670	0.0101864	0.0258524	0.0110461	ADRB2/MMP9/CAV1/CCL2	4
GO:0010675	regulation of cellular carbohydrate metabolic process	3/59	142/18670	0.0102649	0.0259844	0.0111025	AKT1/PPARA/IGFBP3	3
GO:0038127	ERBB signaling pathway	3/59	142/18670	0.0102649	0.0259844	0.0111025	AKT1/MMP9/EGF	3
GO:0050871	positive regulation of B cell activation	3/59	142/18670	0.0102649	0.0259844	0.0111025	IL4/IL6/IL2	3
GO:0045927	positive regulation of growth	4/59	270/18670	0.0104471	0.0263213	0.0112464	MAPK14/AKT1/VEGFA/IL2	4
GO:0006606	protein import into nucleus	3/59	143/18670	0.0104616	0.0263213	0.0112464	PTGS2/MAPK14/AKT1	3
GO:0031056	regulation of histone modification	3/59	143/18670	0.0104616	0.0263213	0.0112464	VEGFA/MAPK8/IL1B	3
GO:0002534	cytokine production involved in inflammatory response	2/59	49/18670	0.0104963	0.0263213	0.0112464	MAPK14/NOS2	2
GO:0003254	regulation of membrane depolarization	2/59	49/18670	0.0104963	0.0263213	0.0112464	SCN5A/KDR	2
GO:0010712	regulation of collagen metabolic process	2/59	49/18670	0.0104963	0.0263213	0.0112464	PPARG/IL6	2
GO:0032757	positive regulation of interleukin-8 production	2/59	49/18670	0.0104963	0.0263213	0.0112464	IL1B/SERPINE1	2
GO:0043124	negative regulation of I-kappaB kinase/NF-kappaB signaling	2/59	49/18670	0.0104963	0.0263213	0.0112464	ESR1/STAT1	2
GO:0071715	icosanoid transport	2/59	49/18670	0.0104963	0.0263213	0.0112464	NOS2/IL1B	2
GO:1901571	fatty acid derivative transport	2/59	49/18670	0.0104963	0.0263213	0.0112464	NOS2/IL1B	2
GO:1904707	positive regulation of vascular smooth muscle cell proliferation	2/59	49/18670	0.0104963	0.0263213	0.0112464	MMP9/MMP2	2
GO:0071322	cellular response to carbohydrate stimulus	3/59	144/18670	0.0106606	0.026665	0.0113933	HIF1A/ICAM1/RAF1	3
GO:1902107	positive regulation of leukocyte differentiation	3/59	144/18670	0.0106606	0.026665	0.0113933	FOS/IL4/IL2	3
GO:1904064	positive regulation of cation transmembrane transport	3/59	144/18670	0.0106606	0.026665	0.0113933	ADRB2/CCL2/CXCL10	3
GO:1902105	regulation of leukocyte differentiation	4/59	272/18670	0.010712	0.026771	0.0114385	FOS/SOD1/IL4/IL2	4
GO:0098742	cell-cell adhesion via plasma-membrane adhesion molecules	4/59	273/18670	0.0108461	0.0270831	0.0115719	MAPK14/ICAM1/SELE/VCAM1	4
GO:0007612	learning	3/59	145/18670	0.0108617	0.0270859	0.0115731	PTGS2/FOS/HIF1A	3
GO:0001706	endoderm formation	2/59	50/18670	0.0109117	0.0270859	0.0115731	MMP9/MMP2	2
GO:0001961	positive regulation of cytokine-mediated signaling pathway	2/59	50/18670	0.0109117	0.0270859	0.0115731	HIF1A/CASP1	2
GO:0010171	body morphogenesis	2/59	50/18670	0.0109117	0.0270859	0.0115731	MMP2/COL1A1	2
GO:0014009	glial cell proliferation	2/59	50/18670	0.0109117	0.0270859	0.0115731	IL6/IL1B	2
GO:0045104	intermediate filament cytoskeleton organization	2/59	50/18670	0.0109117	0.0270859	0.0115731	SOD1/RAF1	2
GO:0086009	membrane repolarization	2/59	50/18670	0.0109117	0.0270859	0.0115731	SCN5A/CAV1	2
GO:0035264	multicellular organism growth	3/59	146/18670	0.011065	0.0274435	0.0117259	ADRB2/ADRB1/SOD1	3
GO:0048568	embryonic organ development	5/59	428/18670	0.0112317	0.0278335	0.0118925	AKT1/VEGFA/HIF1A/SOD1/KDR	5
GO:0019359	nicotinamide nucleotide biosynthetic process	3/59	147/18670	0.0112706	0.0278594	0.0119036	PTGS2/HIF1A/PPARA	3
GO:0019363	pyridine nucleotide biosynthetic process	3/59	147/18670	0.0112706	0.0278594	0.0119036	PTGS2/HIF1A/PPARA	3
GO:0090263	positive regulation of canonical Wnt signaling pathway	3/59	147/18670	0.0112706	0.0278594	0.0119036	EGF/CAV1/COL1A1	3
GO:0001954	positive regulation of cell-matrix adhesion	2/59	51/18670	0.0113342	0.0278603	0.011904	VEGFA/KDR	2
GO:0002712	regulation of B cell mediated immunity	2/59	51/18670	0.0113342	0.0278603	0.011904	IL4/IL2	2
GO:0002889	regulation of immunoglobulin mediated immune response	2/59	51/18670	0.0113342	0.0278603	0.011904	IL4/IL2	2
GO:0019369	arachidonic acid metabolic process	2/59	51/18670	0.0113342	0.0278603	0.011904	PTGS1/PTGS2	2
GO:0045103	intermediate filament-based process	2/59	51/18670	0.0113342	0.0278603	0.011904	SOD1/RAF1	2
GO:2001258	negative regulation of cation channel activity	2/59	51/18670	0.0113342	0.0278603	0.011904	MMP9/CAV1	2
GO:0051052	regulation of DNA metabolic process	5/59	429/18670	0.0113372	0.0278603	0.011904	PPARG/AKT1/IL4/IL6/IL2	5
GO:0008643	carbohydrate transport	3/59	148/18670	0.0114783	0.0281132	0.012012	MAPK14/AKT1/IL1B	3
GO:0014065	phosphatidylinositol 3-kinase signaling	3/59	148/18670	0.0114783	0.0281132	0.012012	AKT1/CAT/KDR	3
GO:0035148	tube formation	3/59	148/18670	0.0114783	0.0281132	0.012012	CASP3/VEGFA/HIF1A	3
GO:0051592	response to calcium ion	3/59	148/18670	0.0114783	0.0281132	0.012012	SCN5A/FOS/CAV1	3
GO:0001822	kidney development	4/59	278/18670	0.0115329	0.0282236	0.0120592	VEGFA/MMP9/CAT/STAT1	4
GO:2000058	regulation of ubiquitin-dependent protein catabolic process	3/59	149/18670	0.0116882	0.0285798	0.0122114	AKT1/EGF/CAV1	3
GO:0031529	ruffle organization	2/59	52/18670	0.0117638	0.0287407	0.0122802	ICAM1/CAV1	2
GO:0048754	branching morphogenesis of an epithelial tube	3/59	150/18670	0.0119004	0.0290263	0.0124022	ESR1/VEGFA/EGF	3
GO:0072525	pyridine-containing compound biosynthetic process	3/59	150/18670	0.0119004	0.0290263	0.0124022	PTGS2/HIF1A/PPARA	3
GO:0000186	activation of MAPKK activity	2/59	53/18670	0.0122005	0.0296111	0.0126521	EGF/RAF1	2
GO:0002043	blood vessel endothelial cell proliferation involved in sprouting angiogenesis	2/59	53/18670	0.0122005	0.0296111	0.0126521	VEGFA/HMOX1	2
GO:0031638	zymogen activation	2/59	53/18670	0.0122005	0.0296111	0.0126521	PLAT/SERPINE1	2
GO:0060563	neuroepithelial cell differentiation	2/59	53/18670	0.0122005	0.0296111	0.0126521	SOD1/SERPINE1	2
GO:0070228	regulation of lymphocyte apoptotic process	2/59	53/18670	0.0122005	0.0296111	0.0126521	HIF1A/IL2	2
GO:1905517	macrophage migration	2/59	53/18670	0.0122005	0.0296111	0.0126521	MAPK14/CCL2	2
GO:0001678	cellular glucose homeostasis	3/59	152/18670	0.0123313	0.0298794	0.0127667	HIF1A/ICAM1/RAF1	3
GO:0030902	hindbrain development	3/59	152/18670	0.0123313	0.0298794	0.0127667	SCN5A/SLC6A4/EGF	3
GO:0021700	developmental maturation	4/59	284/18670	0.0123935	0.0300052	0.0128205	PPARG/VEGFA/HIF1A/MMP2	4
GO:0090316	positive regulation of intracellular protein transport	3/59	153/18670	0.0125501	0.0303596	0.0129719	PTGS2/MAPK14/IL1B	3
GO:0010524	positive regulation of calcium ion transport into cytosol	2/59	54/18670	0.0126442	0.0304621	0.0130157	CAV1/CXCL10	2
GO:0030199	collagen fibril organization	2/59	54/18670	0.0126442	0.0304621	0.0130157	COL1A1/COL3A1	2
GO:0032655	regulation of interleukin-12 production	2/59	54/18670	0.0126442	0.0304621	0.0130157	MAPK14/CD40LG	2
GO:0032663	regulation of interleukin-2 production	2/59	54/18670	0.0126442	0.0304621	0.0130157	IL1B/IL1A	2
GO:0061005	cell differentiation involved in kidney development	2/59	54/18670	0.0126442	0.0304621	0.0130157	MMP9/STAT1	2
GO:0060828	regulation of canonical Wnt signaling pathway	4/59	286/18670	0.0126892	0.0305454	0.0130513	MAPK14/EGF/CAV1/COL1A1	4
GO:0042304	regulation of fatty acid biosynthetic process	2/59	55/18670	0.013095	0.031445	0.0134356	PTGS2/IL1B	2
GO:0042306	regulation of protein import into nucleus	2/59	55/18670	0.013095	0.031445	0.0134356	PTGS2/MAPK14	2
GO:0098900	regulation of action potential	2/59	55/18670	0.013095	0.031445	0.0134356	SCN5A/CAV1	2
GO:0044282	small molecule catabolic process	5/59	445/18670	0.0131177	0.0314739	0.013448	PON1/NOS2/AKT1/NOS3/PPARA	5
GO:0034767	positive regulation of ion transmembrane transport	3/59	156/18670	0.01322	0.0316935	0.0135418	ADRB2/CCL2/CXCL10	3
GO:0000768	syncytium formation by plasma membrane fusion	2/59	56/18670	0.0135527	0.0323069	0.0138039	MAPK14/CXCL10	2
GO:0032615	interleukin-12 production	2/59	56/18670	0.0135527	0.0323069	0.0138039	MAPK14/CD40LG	2
GO:0060688	regulation of morphogenesis of a branching structure	2/59	56/18670	0.0135527	0.0323069	0.0138039	ESR1/VEGFA	2
GO:0086002	cardiac muscle cell action potential involved in contraction	2/59	56/18670	0.0135527	0.0323069	0.0138039	SCN5A/CAV1	2
GO:0086065	cell communication involved in cardiac conduction	2/59	56/18670	0.0135527	0.0323069	0.0138039	SCN5A/CAV1	2
GO:0140253	cell-cell fusion	2/59	56/18670	0.0135527	0.0323069	0.0138039	MAPK14/CXCL10	2
GO:1903202	negative regulation of oxidative stress-induced cell death	2/59	56/18670	0.0135527	0.0323069	0.0138039	AKT1/HIF1A	2
GO:0005996	monosaccharide metabolic process	4/59	292/18670	0.0136036	0.0323759	0.0138334	MAPK14/AKT1/PPARA/IGFBP3	4
GO:0090287	regulation of cellular response to growth factor stimulus	4/59	292/18670	0.0136036	0.0323759	0.0138334	VEGFA/HIF1A/CAV1/IL1B	4
GO:0072001	renal system development	4/59	293/18670	0.01376	0.0327216	0.0139811	VEGFA/MMP9/CAT/STAT1	4
GO:0045088	regulation of innate immune response	5/59	452/18670	0.0139532	0.0331545	0.014166	ESR1/PPARG/STAT1/RAF1/CAV1	5
GO:0002066	columnar/cuboidal epithelial cell development	2/59	57/18670	0.0140172	0.0331726	0.0141738	HIF1A/SOD1	2
GO:0033344	cholesterol efflux	2/59	57/18670	0.0140172	0.0331726	0.0141738	PON1/EGF	2
GO:0060760	positive regulation of response to cytokine stimulus	2/59	57/18670	0.0140172	0.0331726	0.0141738	HIF1A/CASP1	2
GO:0071398	cellular response to fatty acid	2/59	57/18670	0.0140172	0.0331726	0.0141738	PPARG/AKT1	2
GO:1900408	negative regulation of cellular response to oxidative stress	2/59	57/18670	0.0140172	0.0331726	0.0141738	AKT1/HIF1A	2
GO:0006754	ATP biosynthetic process	3/59	160/18670	0.0141444	0.033393	0.014268	HIF1A/IL4/PPARA	3
GO:0007519	skeletal muscle tissue development	3/59	160/18670	0.0141444	0.033393	0.014268	MAPK14/FOS/CAV1	3
GO:0030203	glycosaminoglycan metabolic process	3/59	160/18670	0.0141444	0.033393	0.014268	AKT1/EGF/IL1B	3
GO:0032635	interleukin-6 production	3/59	161/18670	0.0143811	0.0339247	0.0144951	NOS2/IL6/IL1B	3
GO:0006949	syncytium formation	2/59	58/18670	0.0144886	0.0340148	0.0145336	MAPK14/CXCL10	2
GO:0017001	antibiotic catabolic process	2/59	58/18670	0.0144886	0.0340148	0.0145336	MPO/CAT	2
GO:0042093	T-helper cell differentiation	2/59	58/18670	0.0144886	0.0340148	0.0145336	IL6/IL2	2
GO:0061900	glial cell activation	2/59	58/18670	0.0144886	0.0340148	0.0145336	IL6/IL1B	2
GO:0098930	axonal transport	2/59	58/18670	0.0144886	0.0340148	0.0145336	HIF1A/SOD1	2
GO:1904589	regulation of protein import	2/59	58/18670	0.0144886	0.0340148	0.0145336	PTGS2/MAPK14	2
GO:0090068	positive regulation of cell cycle process	4/59	298/18670	0.0145591	0.0341529	0.0145926	AKT1/EGF/IL1B/IL1A	4
GO:0051170	import into nucleus	3/59	163/18670	0.0148613	0.0348342	0.0148838	PTGS2/MAPK14/AKT1	3
GO:0070372	regulation of ERK1 and ERK2 cascade	4/59	300/18670	0.0148868	0.0348661	0.0148974	KDR/ICAM1/IL1B/CCL2	4
GO:0001836	release of cytochrome c from mitochondria	2/59	59/18670	0.0149669	0.0349425	0.01493	AKT1/MMP9	2
GO:0010518	positive regulation of phospholipase activity	2/59	59/18670	0.0149669	0.0349425	0.01493	ESR1/SELE	2
GO:0032890	regulation of organic acid transport	2/59	59/18670	0.0149669	0.0349425	0.01493	AKT1/IL1B	2
GO:1902883	negative regulation of response to oxidative stress	2/59	59/18670	0.0149669	0.0349425	0.01493	AKT1/HIF1A	2
GO:0007088	regulation of mitotic nuclear division	3/59	164/18670	0.0151048	0.0352366	0.0150557	EGF/IL1B/IL1A	3
GO:0002294	CD4-positive, alpha-beta T cell differentiation involved in immune response	2/59	60/18670	0.0154518	0.0359322	0.0153529	IL6/IL2	2
GO:0046324	regulation of glucose import	2/59	60/18670	0.0154518	0.0359322	0.0153529	MAPK14/AKT1	2
GO:0051893	regulation of focal adhesion assembly	2/59	60/18670	0.0154518	0.0359322	0.0153529	VEGFA/KDR	2
GO:0090109	regulation of cell-substrate junction assembly	2/59	60/18670	0.0154518	0.0359322	0.0153529	VEGFA/KDR	2
GO:0046034	ATP metabolic process	4/59	305/18670	0.0157265	0.0365422	0.0156135	HIF1A/CYCS/IL4/PPARA	4
GO:0033209	tumor necrosis factor-mediated signaling pathway	3/59	167/18670	0.0158489	0.0367684	0.0157102	STAT1/CD40LG/CASP1	3
GO:0035051	cardiocyte differentiation	3/59	167/18670	0.0158489	0.0367684	0.0157102	VEGFA/VCAM1/PPARA	3
GO:0002287	alpha-beta T cell activation involved in immune response	2/59	61/18670	0.0159435	0.0368428	0.015742	IL6/IL2	2
GO:0002293	alpha-beta T cell differentiation involved in immune response	2/59	61/18670	0.0159435	0.0368428	0.015742	IL6/IL2	2
GO:0007405	neuroblast proliferation	2/59	61/18670	0.0159435	0.0368428	0.015742	VEGFA/HIF1A	2
GO:0034113	heterotypic cell-cell adhesion	2/59	61/18670	0.0159435	0.0368428	0.015742	VCAM1/IL1B	2
GO:2001244	positive regulation of intrinsic apoptotic signaling pathway	2/59	61/18670	0.0159435	0.0368428	0.015742	SOD1/CAV1	2
GO:0001906	cell killing	3/59	168/18670	0.0161014	0.0371493	0.0158729	NOS2/IL4/ICAM1	3
GO:0050806	positive regulation of synaptic transmission	3/59	168/18670	0.0161014	0.0371493	0.0158729	PTGS2/ADRB2/CCL2	3
GO:0030307	positive regulation of cell growth	3/59	169/18670	0.0163562	0.0376487	0.0160863	AKT1/VEGFA/IL2	3
GO:0045619	regulation of lymphocyte differentiation	3/59	169/18670	0.0163562	0.0376487	0.0160863	SOD1/IL4/IL2	3
GO:0060538	skeletal muscle organ development	3/59	169/18670	0.0163562	0.0376487	0.0160863	MAPK14/FOS/CAV1	3
GO:0010676	positive regulation of cellular carbohydrate metabolic process	2/59	62/18670	0.0164419	0.0377573	0.0161327	AKT1/PPARA	2
GO:0010830	regulation of myotube differentiation	2/59	62/18670	0.0164419	0.0377573	0.0161327	MAPK14/CXCL10	2
GO:0032623	interleukin-2 production	2/59	62/18670	0.0164419	0.0377573	0.0161327	IL1B/IL1A	2
GO:0006022	aminoglycan metabolic process	3/59	170/18670	0.0166133	0.0380916	0.0162755	AKT1/EGF/IL1B	3
GO:0043433	negative regulation of DNA-binding transcription factor activity	3/59	170/18670	0.0166133	0.0380916	0.0162755	ESR1/CAT/HMOX1	3
GO:0003205	cardiac chamber development	3/59	171/18670	0.0168727	0.0386261	0.0165039	SCN5A/HIF1A/NOS3	3
GO:0009206	purine ribonucleoside triphosphate biosynthetic process	3/59	171/18670	0.0168727	0.0386261	0.0165039	HIF1A/IL4/PPARA	3
GO:0034394	protein localization to cell surface	2/59	63/18670	0.0169468	0.0387356	0.0165507	AKT1/EGF	2
GO:0046622	positive regulation of organ growth	2/59	63/18670	0.0169468	0.0387356	0.0165507	MAPK14/AKT1	2
GO:0009145	purine nucleoside triphosphate biosynthetic process	3/59	172/18670	0.0171343	0.0390731	0.0166949	HIF1A/IL4/PPARA	3
GO:0021543	pallium development	3/59	172/18670	0.0171343	0.0390731	0.0166949	CASP3/HIF1A/COL3A1	3
GO:0032874	positive regulation of stress-activated MAPK cascade	3/59	172/18670	0.0171343	0.0390731	0.0166949	VEGFA/IL1B/CD40LG	3
GO:0070304	positive regulation of stress-activated protein kinase signaling cascade	3/59	173/18670	0.0173982	0.0396442	0.0169389	VEGFA/IL1B/CD40LG	3
GO:0035773	insulin secretion involved in cellular response to glucose stimulus	2/59	64/18670	0.0174584	0.0396585	0.0169451	HIF1A/RAF1	2
GO:0045670	regulation of osteoclast differentiation	2/59	64/18670	0.0174584	0.0396585	0.0169451	FOS/IL4	2
GO:0048247	lymphocyte chemotaxis	2/59	64/18670	0.0174584	0.0396585	0.0169451	CCL2/CXCL10	2
GO:1900449	regulation of glutamate receptor signaling pathway	2/59	64/18670	0.0174584	0.0396585	0.0169451	ADRB2/CCL2	2
GO:0002695	negative regulation of leukocyte activation	3/59	175/18670	0.0179329	0.0406784	0.0173808	CASP3/HMOX1/IL2	3
GO:0015711	organic anion transport	5/59	482/18670	0.0179422	0.0406784	0.0173808	PPARG/NOS2/AKT1/IL1B/PPARA	5
GO:0014823	response to activity	2/59	65/18670	0.0179764	0.0406784	0.0173808	HIF1A/CAT	2
GO:0032729	positive regulation of interferon-gamma production	2/59	65/18670	0.0179764	0.0406784	0.0173808	IL1B/IL2	2
GO:0051148	negative regulation of muscle cell differentiation	2/59	65/18670	0.0179764	0.0406784	0.0173808	PPARA/CXCL10	2
GO:0022604	regulation of cell morphogenesis	5/59	484/18670	0.0182324	0.0412008	0.017604	VEGFA/KDR/ICAM1/CCL2/SPP1	5
GO:0007204	positive regulation of cytosolic calcium ion concentration	4/59	319/18670	0.0182353	0.0412008	0.017604	ESR1/CAV1/IL2/CXCL10	4
GO:0009201	ribonucleoside triphosphate biosynthetic process	3/59	177/18670	0.0184766	0.0416822	0.0178097	HIF1A/IL4/PPARA	3
GO:0048469	cell maturation	3/59	177/18670	0.0184766	0.0416822	0.0178097	PPARG/VEGFA/HIF1A	3
GO:0008361	regulation of cell size	3/59	179/18670	0.0190296	0.0428365	0.0183029	AKT1/VEGFA/SPP1	3
GO:0030177	positive regulation of Wnt signaling pathway	3/59	179/18670	0.0190296	0.0428365	0.0183029	EGF/CAV1/COL1A1	3
GO:1903391	regulation of adherens junction organization	2/59	67/18670	0.019032	0.0428365	0.0183029	VEGFA/KDR	2
GO:0002292	T cell differentiation involved in immune response	2/59	68/18670	0.0195694	0.0437948	0.0187124	IL6/IL2	2
GO:0006625	protein targeting to peroxisome	2/59	68/18670	0.0195694	0.0437948	0.0187124	NOS2/CAT	2
GO:0010812	negative regulation of cell-substrate adhesion	2/59	68/18670	0.0195694	0.0437948	0.0187124	SERPINE1/COL1A1	2
GO:0046323	glucose import	2/59	68/18670	0.0195694	0.0437948	0.0187124	MAPK14/AKT1	2
GO:0072662	protein localization to peroxisome	2/59	68/18670	0.0195694	0.0437948	0.0187124	NOS2/CAT	2
GO:0072663	establishment of protein localization to peroxisome	2/59	68/18670	0.0195694	0.0437948	0.0187124	NOS2/CAT	2
GO:0051188	cofactor biosynthetic process	4/59	326/18670	0.0195781	0.0437948	0.0187124	PTGS2/HIF1A/SOD1/PPARA	4
GO:0048015	phosphatidylinositol-mediated signaling	3/59	181/18670	0.0195916	0.0437948	0.0187124	AKT1/CAT/KDR	3
GO:0051147	regulation of muscle cell differentiation	3/59	181/18670	0.0195916	0.0437948	0.0187124	MAPK14/PPARA/CXCL10	3
GO:0061138	morphogenesis of a branching epithelium	3/59	182/18670	0.0198761	0.044397	0.0189697	ESR1/VEGFA/EGF	3
GO:0019058	viral life cycle	4/59	328/18670	0.0199728	0.0445791	0.0190475	DPP4/ICAM1/CAV1/CCL2	4
GO:0008088	axo-dendritic transport	2/59	69/18670	0.0201131	0.0447566	0.0191233	HIF1A/SOD1	2
GO:0015909	long-chain fatty acid transport	2/59	69/18670	0.0201131	0.0447566	0.0191233	PPARG/AKT1	2
GO:0043574	peroxisomal transport	2/59	69/18670	0.0201131	0.0447566	0.0191233	NOS2/CAT	2
GO:0086003	cardiac muscle cell contraction	2/59	69/18670	0.0201131	0.0447566	0.0191233	SCN5A/CAV1	2
GO:0009127	purine nucleoside monophosphate biosynthetic process	3/59	183/18670	0.0201628	0.0447658	0.0191273	HIF1A/IL4/PPARA	3
GO:0009168	purine ribonucleoside monophosphate biosynthetic process	3/59	183/18670	0.0201628	0.0447658	0.0191273	HIF1A/IL4/PPARA	3
GO:0038061	NIK/NF-kappaB signaling	3/59	183/18670	0.0201628	0.0447658	0.0191273	NR3C2/AKT1/IL1B	3
GO:0043409	negative regulation of MAPK cascade	3/59	184/18670	0.0204519	0.045305	0.0193577	AKT1/CAV1/IL1B	3
GO:0048017	inositol lipid-mediated signaling	3/59	184/18670	0.0204519	0.045305	0.0193577	AKT1/CAT/KDR	3
GO:0048639	positive regulation of developmental growth	3/59	184/18670	0.0204519	0.045305	0.0193577	MAPK14/AKT1/VEGFA	3
GO:0002709	regulation of T cell mediated immunity	2/59	70/18670	0.0206631	0.0455672	0.0194697	IL6/IL1B	2
GO:0010517	regulation of phospholipase activity	2/59	70/18670	0.0206631	0.0455672	0.0194697	ESR1/SELE	2
GO:0034121	regulation of toll-like receptor signaling pathway	2/59	70/18670	0.0206631	0.0455672	0.0194697	ESR1/CAV1	2
GO:0051966	regulation of synaptic transmission, glutamatergic	2/59	70/18670	0.0206631	0.0455672	0.0194697	PTGS2/CCL2	2
GO:0072091	regulation of stem cell proliferation	2/59	70/18670	0.0206631	0.0455672	0.0194697	VEGFA/HIF1A	2
GO:2001259	positive regulation of cation channel activity	2/59	70/18670	0.0206631	0.0455672	0.0194697	ADRB2/CCL2	2
GO:0046328	regulation of JNK cascade	3/59	185/18670	0.0207432	0.0456754	0.0195159	AKT1/IL1B/CD40LG	3
GO:1902275	regulation of chromatin organization	3/59	185/18670	0.0207432	0.0456754	0.0195159	VEGFA/MAPK8/IL1B	3
GO:0016042	lipid catabolic process	4/59	333/18670	0.0209809	0.0461644	0.0197248	AKT1/IL1B/PPARA/SPP1	4
GO:0030308	negative regulation of cell growth	3/59	186/18670	0.0210369	0.0462528	0.0197626	PPARG/PPARA/SPP1	3
GO:0019933	cAMP-mediated signaling	3/59	187/18670	0.0213328	0.0468684	0.0200257	ADRB2/ADRB1/CXCL10	3
GO:0009205	purine ribonucleoside triphosphate metabolic process	4/59	335/18670	0.0213929	0.0469304	0.0200521	HIF1A/CYCS/IL4/PPARA	4
GO:0060070	canonical Wnt signaling pathway	4/59	335/18670	0.0213929	0.0469304	0.0200521	MAPK14/EGF/CAV1/COL1A1	4
GO:0009142	nucleoside triphosphate biosynthetic process	3/59	188/18670	0.021631	0.0473822	0.0202452	HIF1A/IL4/PPARA	3
GO:0051783	regulation of nuclear division	3/59	188/18670	0.021631	0.0473822	0.0202452	EGF/IL1B/IL1A	3
GO:0006635	fatty acid beta-oxidation	2/59	72/18670	0.0217819	0.0476066	0.020341	AKT1/PPARA	2
GO:0019226	transmission of nerve impulse	2/59	72/18670	0.0217819	0.0476066	0.020341	SCN5A/SOD1	2
GO:0060193	positive regulation of lipase activity	2/59	72/18670	0.0217819	0.0476066	0.020341	ESR1/SELE	2
GO:0019362	pyridine nucleotide metabolic process	3/59	189/18670	0.0219315	0.0478623	0.0204503	PTGS2/HIF1A/PPARA	3
GO:0046496	nicotinamide nucleotide metabolic process	3/59	189/18670	0.0219315	0.0478623	0.0204503	PTGS2/HIF1A/PPARA	3
GO:0032945	negative regulation of mononuclear cell proliferation	2/59	73/18670	0.0223506	0.0485969	0.0207642	CASP3/IL2	2
GO:0033555	multicellular organismal response to stress	2/59	73/18670	0.0223506	0.0485969	0.0207642	ADRB1/DPP4	2
GO:0045685	regulation of glial cell differentiation	2/59	73/18670	0.0223506	0.0485969	0.0207642	PPARG/IL6	2
GO:0050672	negative regulation of lymphocyte proliferation	2/59	73/18670	0.0223506	0.0485969	0.0207642	CASP3/IL2	2
GO:0050688	regulation of defense response to virus	2/59	73/18670	0.0223506	0.0485969	0.0207642	STAT1/IL1B	2
GO:0009167	purine ribonucleoside monophosphate metabolic process	4/59	340/18670	0.0224444	0.0487649	0.020836	HIF1A/CYCS/IL4/PPARA	4
GO:0009126	purine nucleoside monophosphate metabolic process	4/59	341/18670	0.0226585	0.0491574	0.0210037	HIF1A/CYCS/IL4/PPARA	4
GO:0009199	ribonucleoside triphosphate metabolic process	4/59	341/18670	0.0226585	0.0491574	0.0210037	HIF1A/CYCS/IL4/PPARA	4
GO:0009144	purine nucleoside triphosphate metabolic process	4/59	342/18670	0.0228738	0.0495176	0.0211576	HIF1A/CYCS/IL4/PPARA	4
GO:0009064	glutamine family amino acid metabolic process	2/59	74/18670	0.0229255	0.0495176	0.0211576	NOS2/NOS3	2
GO:0032507	maintenance of protein location in cell	2/59	74/18670	0.0229255	0.0495176	0.0211576	AKT1/CAV1	2
GO:0043367	CD4-positive, alpha-beta T cell differentiation	2/59	74/18670	0.0229255	0.0495176	0.0211576	IL6/IL2	2
GO:0086001	cardiac muscle cell action potential	2/59	74/18670	0.0229255	0.0495176	0.0211576	SCN5A/CAV1	2
GO:0099601	regulation of neurotransmitter receptor activity	2/59	74/18670	0.0229255	0.0495176	0.0211576	ADRB2/CCL2	2
GO:0006913	nucleocytoplasmic transport	4/59	343/18670	0.0230903	0.0498372	0.0212942	PTGS2/MAPK14/AKT1/IL1B	4
