# Supplementary material for: Integrating Network Pharmacology and Pharmacological Validation for Deciphering the Mechanism of Qishen Yixin Granules in Suppressing myocardial fibrosis
Source: Research Square preprint supplement (doi:10.21203/rs.3.rs-1526523/v1), 2022-04-08
Supplement: Supplementary file 4 [file c0ffdcad12b355d8af8c34f0.xlsx]

## Sheet: KEGG
ID	Description	GeneRatio	BgRatio	pvalue	p.adjust	qvalue	geneID	Count
hsa04668	TNF signaling pathway	15/55	112/6833	4.38242e-15	4.64536e-13	1.7991e-13	PTGS2/CASP3/MAPK14/AKT1/FOS/MMP9/MAPK8/ICAM1/SELE/VCAM1/MMP3/IL6/IL1B/CCL2/CXCL10	15
hsa04657	IL-17 signaling pathway	13/55	94/6833	2.43943e-13	1.2929e-11	5.00726e-12	PTGS2/CASP3/MAPK14/FOS/MMP9/IL4/MAPK8/MMP1/MMP3/IL6/IL1B/CCL2/CXCL10	13
hsa04625	C-type lectin receptor signaling pathway	10/55	104/6833	7.1256e-09	2.51771e-07	9.75081e-08	PTGS2/MAPK14/AKT1/MAPK8/STAT1/IL6/RAF1/IL1B/IL2/CASP1	10
hsa04620	Toll-like receptor signaling pathway	9/55	104/6833	1.09886e-07	2.91198e-06	1.12778e-06	MAPK14/AKT1/FOS/MAPK8/STAT1/IL6/IL1B/CXCL10/SPP1	9
hsa04659	Th17 cell differentiation	9/55	107/6833	1.4079e-07	2.9216e-06	1.1315e-06	MAPK14/FOS/HIF1A/IL4/MAPK8/STAT1/IL6/IL1B/IL2	9
hsa04066	HIF-1 signaling pathway	9/55	109/6833	1.65373e-07	2.9216e-06	1.1315e-06	NOS2/AKT1/VEGFA/HIF1A/HMOX1/EGF/IL6/NOS3/SERPINE1	9
hsa04370	VEGF signaling pathway	7/55	59/6833	3.64992e-07	5.52702e-06	2.14056e-06	PTGS2/MAPK14/AKT1/VEGFA/KDR/RAF1/NOS3	7
hsa01522	Endocrine resistance	8/55	98/6833	9.38132e-07	1.24302e-05	4.8141e-06	ESR1/MAPK14/AKT1/FOS/MMP9/MAPK8/MMP2/RAF1	8
hsa04917	Prolactin signaling pathway	7/55	70/6833	1.19824e-06	1.41126e-05	5.46567e-06	ESR1/MAPK14/AKT1/FOS/MAPK8/STAT1/RAF1	7
hsa04660	T cell receptor signaling pathway	8/55	104/6833	1.47973e-06	1.56851e-05	6.07468e-06	MAPK14/AKT1/FOS/IL4/MAPK8/RAF1/IL2/CD40LG	8
hsa04380	Osteoclast differentiation	8/55	128/6833	7.08247e-06	6.82493e-05	2.64322e-05	PPARG/MAPK14/AKT1/FOS/MAPK8/STAT1/IL1B/IL1A	8
hsa04664	Fc epsilon RI signaling pathway	6/55	68/6833	1.53445e-05	0.000135543	5.24943e-05	MAPK14/AKT1/IL4/MAPK8/ALOX5/RAF1	6
hsa04010	MAPK signaling pathway	11/55	294/6833	1.70668e-05	0.00013916	5.38952e-05	CASP3/MAPK14/AKT1/VEGFA/FOS/KDR/MAPK8/EGF/RAF1/IL1B/IL1A	11
hsa04510	Focal adhesion	9/55	199/6833	2.50486e-05	0.000189654	7.34508e-05	AKT1/VEGFA/KDR/MAPK8/EGF/RAF1/CAV1/COL1A1/SPP1	9
hsa01521	EGFR tyrosine kinase inhibitor resistance	6/55	79/6833	3.64121e-05	0.000257312	9.96541e-05	AKT1/VEGFA/KDR/EGF/IL6/RAF1	6
hsa04923	Regulation of lipolysis in adipocytes	5/55	55/6833	7.19237e-05	0.000476495	0.000184541	PTGS1/PTGS2/ADRB2/ADRB1/AKT1	5
hsa04068	FoxO signaling pathway	7/55	131/6833	7.64875e-05	0.000476922	0.000184707	MAPK14/AKT1/CAT/MAPK8/EGF/IL6/RAF1	7
hsa04658	Th1 and Th2 cell differentiation	6/55	92/6833	8.62134e-05	0.000507701	0.000196627	MAPK14/FOS/IL4/MAPK8/STAT1/IL2	6
hsa04151	PI3K-Akt signaling pathway	11/55	354/6833	9.43351e-05	0.000526291	0.000203827	AKT1/VEGFA/KDR/IL4/EGF/IL6/RAF1/NOS3/IL2/COL1A1/SPP1	11
hsa04371	Apelin signaling pathway	7/55	137/6833	0.000101568	0.000536741	0.000207874	NOS2/AKT1/RAF1/NOS3/PLAT/SERPINE1/SPP1	7
hsa04915	Estrogen signaling pathway	7/55	138/6833	0.000106335	0.000536741	0.000207874	ESR1/AKT1/FOS/MMP9/MMP2/RAF1/NOS3	7
hsa04218	Cellular senescence	7/55	160/6833	0.000267042	0.00128666	0.000498309	MAPK14/AKT1/IL6/RAF1/SERPINE1/IL1A/IGFBP3	7
hsa04630	JAK-STAT signaling pathway	7/55	162/6833	0.000288198	0.00130391	0.000504989	AKT1/IL4/STAT1/EGF/IL6/RAF1/IL2	7
hsa04726	Serotonergic synapse	6/55	115/6833	0.000295225	0.00130391	0.000504989	PTGS1/PTGS2/SLC6A4/CASP3/ALOX5/RAF1	6
hsa04611	Platelet activation	6/55	124/6833	0.000443255	0.0018794	0.000727871	PTGS1/MAPK14/AKT1/NOS3/COL1A1/COL3A1	6
hsa04621	NOD-like receptor signaling pathway	7/55	181/6833	0.000564691	0.0022174	0.000858774	MAPK14/MAPK8/STAT1/IL6/IL1B/CCL2/CASP1	7
hsa04610	Complement and coagulation cascades	5/55	85/6833	0.000564809	0.0022174	0.000858774	F7/F3/PLAT/THBD/SERPINE1	5
hsa04672	Intestinal immune network for IgA production	4/55	49/6833	0.000608542	0.00230377	0.000892223	IL4/IL6/IL2/CD40LG	4
hsa04210	Apoptosis	6/55	136/6833	0.000724476	0.00264809	0.00102557	CASP3/AKT1/FOS/CYCS/MAPK8/RAF1	6
hsa04064	NF-kappa B signaling pathway	5/55	104/6833	0.00141058	0.00498406	0.00193027	PTGS2/ICAM1/VCAM1/IL1B/CD40LG	5
hsa04623	Cytosolic DNA-sensing pathway	4/55	63/6833	0.00157413	0.00529207	0.00204956	IL6/IL1B/CXCL10/CASP1	4
hsa04024	cAMP signaling pathway	7/55	216/6833	0.00159761	0.00529207	0.00204956	ADRB2/ADRB1/AKT1/FOS/MAPK8/RAF1/PPARA	7
hsa04670	Leukocyte transendothelial migration	5/55	113/6833	0.00203837	0.0064692	0.00250545	MAPK14/MMP9/ICAM1/VCAM1/MMP2	5
hsa04215	Apoptosis - multiple species	3/55	32/6833	0.00207503	0.0064692	0.00250545	CASP3/CYCS/MAPK8	3
hsa04060	Cytokine-cytokine receptor interaction	8/55	294/6833	0.00222831	0.00674859	0.00261365	IL4/IL6/IL1B/CCL2/IL2/IL1A/CXCL10/CD40LG	8
hsa04071	Sphingolipid signaling pathway	5/55	119/6833	0.00255732	0.00718913	0.00278427	MAPK14/AKT1/MAPK8/RAF1/NOS3	5
hsa04919	Thyroid hormone signaling pathway	5/55	119/6833	0.00255732	0.00718913	0.00278427	ESR1/AKT1/HIF1A/STAT1/RAF1	5
hsa04115	p53 signaling pathway	4/55	72/6833	0.00257723	0.00718913	0.00278427	CASP3/CYCS/SERPINE1/IGFBP3	4
hsa03320	PPAR signaling pathway	4/55	76/6833	0.00313863	0.00853064	0.00330382	PPARG/OLR1/MMP1/PPARA	4
hsa04012	ErbB signaling pathway	4/55	85/6833	0.00469612	0.0124447	0.00481971	AKT1/MAPK8/EGF/RAF1	4
hsa04912	GnRH signaling pathway	4/55	93/6833	0.0064587	0.0163593	0.00633576	MAPK14/MAPK8/MMP2/RAF1	4
hsa04015	Rap1 signaling pathway	6/55	210/6833	0.00648197	0.0163593	0.00633576	MAPK14/AKT1/VEGFA/KDR/EGF/RAF1	6
hsa04261	Adrenergic signaling in cardiomyocytes	5/55	149/6833	0.0066754	0.0164556	0.00637309	SCN5A/ADRB2/ADRB1/MAPK14/AKT1	5
hsa04640	Hematopoietic cell lineage	4/55	99/6833	0.00803701	0.0189316	0.00733201	IL4/IL6/IL1B/IL1A	4
hsa04914	Progesterone-mediated oocyte maturation	4/55	99/6833	0.00803701	0.0189316	0.00733201	MAPK14/AKT1/MAPK8/RAF1	4
hsa04061	Viral protein interaction with cytokine and cytokine receptor	4/55	100/6833	0.00832259	0.0191781	0.00742748	IL6/CCL2/IL2/CXCL10	4
hsa04217	Necroptosis	5/55	159/6833	0.00873196	0.0196933	0.00762702	MAPK8/STAT1/IL1B/IL1A/CASP1	5
hsa04014	Ras signaling pathway	6/55	232/6833	0.0103676	0.022895	0.00886699	AKT1/VEGFA/KDR/MAPK8/EGF/RAF1	6
hsa04022	cGMP-PKG signaling pathway	5/55	167/6833	0.0106667	0.0230748	0.00893663	ADRB2/ADRB1/AKT1/RAF1/NOS3	5
hsa00220	Arginine biosynthesis	2/55	21/6833	0.0121125	0.0256786	0.00994503	NOS2/NOS3	2
hsa04213	Longevity regulating pathway - multiple species	3/55	62/6833	0.0133527	0.0277527	0.0107483	AKT1/SOD1/CAT	3
hsa00590	Arachidonic acid metabolism	3/55	63/6833	0.0139417	0.0284195	0.0110066	PTGS1/PTGS2/ALOX5	3
hsa04722	Neurotrophin signaling pathway	4/55	119/6833	0.0150678	0.0301355	0.0116712	MAPK14/AKT1/MAPK8/RAF1	4
hsa04062	Chemokine signaling pathway	5/55	189/6833	0.017464	0.0342748	0.0132743	AKT1/STAT1/RAF1/CCL2/CXCL10	5
hsa04920	Adipocytokine signaling pathway	3/55	69/6833	0.0177841	0.0342748	0.0132743	AKT1/MAPK8/PPARA	3
hsa04622	RIG-I-like receptor signaling pathway	3/55	70/6833	0.0184763	0.034973	0.0135447	MAPK14/MAPK8/CXCL10	3
hsa01524	Platinum drug resistance	3/55	73/6833	0.0206424	0.0383876	0.0148671	CASP3/AKT1/CYCS	3
hsa04728	Dopaminergic synapse	4/55	132/6833	0.0212406	0.0388191	0.0150342	MAPK14/AKT1/FOS/MAPK8	4
hsa04140	Autophagy - animal	4/55	137/6833	0.0239742	0.0430724	0.0166815	AKT1/HIF1A/MAPK8/RAF1	4
hsa01523	Antifolate resistance	2/55	31/6833	0.0254823	0.0450188	0.0174353	IL6/IL1B	2
hsa04662	B cell receptor signaling pathway	3/55	82/6833	0.027947	0.0485637	0.0188082	AKT1/FOS/RAF1	3
hsa04146	Peroxisome	3/55	83/6833	0.0288333	0.0492957	0.0190917	NOS2/SOD1/CAT	3
