# Supplementary material for: Integrating Network Pharmacology and Pharmacological Validation for Deciphering the Mechanism of Qishen Yixin Granules in Suppressing myocardial fibrosis
Source: Research Square preprint supplement (doi:10.21203/rs.3.rs-1526523/v1), 2022-04-08
Supplement: Supplementary file 5 [file daa4781553837e098365430c.xlsx]

## Sheet: Danggui_ingredients
Mol ID	Molecule Name	MW	AlogP	Hdon	Hacc	OB (%)	Caco-2	BBB	DL	FASA-	HL
MOL000358	beta-sitosterol	414.79	8.08	1	1	36.91	1.32	0.99	0.75	0.23	5.36
MOL000449	Stigmasterol	412.77	7.64	1	1	43.83	1.44	1	0.76	0.22	5.57
MOL000211	Mairin	456.78	6.52	2	3	55.38	0.73	0.22	0.78	0.26	8.87
MOL000239	Jaranol	314.31	2.09	2	6	50.83	0.61	-0.22	0.29	0.29	15.5
MOL000296	hederagenin	414.79	8.08	1	1	36.91	1.32	0.96	0.75	0	5.35
MOL000033	(3S,8S,9S,10R,13R,14S,17R)-10,13-dimethyl-17-[(2R,5S)-5-propan-2-yloctan-2-yl]-2,3,4,7,8,9,11,12,14,15,16,17-dodecahydro-1H-cyclopenta[a]phenanthren-3-ol	428.82	8.54	1	1	36.23	1.45	1.09	0.78	0	5.22
MOL000354	isorhamnetin	316.28	1.76	4	7	49.6	0.31	-0.54	0.31	0.32	14.34
MOL000371	3,9-di-O-methylnissolin	314.36	2.89	0	5	53.74	1.18	0.63	0.48	0	9
MOL000374	5'-hydroxyiso-muronulatol-2',5'-di-O-glucoside	642.67	-0.95	9	16	41.72	-2.47	-3.62	0.69	0	2.52
MOL000378	7-O-methylisomucronulatol	316.38	3.38	1	5	74.69	1.08	0.84	0.3	0	2.98
MOL000379	9,10-dimethoxypterocarpan-3-O-尾-D-glucoside	462.49	0.74	4	10	36.74	-0.63	-1.5	0.92	0	13.06
MOL000380	(6aR,11aR)-9,10-dimethoxy-6a,11a-dihydro-6H-benzofurano[3,2-c]chromen-3-ol	300.33	2.64	1	5	64.26	0.93	0.55	0.42	0	8.49
MOL000387	Bifendate	418.38	2.56	0	10	31.1	0.15	-0.06	0.67	0	17.96
MOL000392	formononetin	268.28	2.58	1	4	69.67	0.78	0.02	0.21	0	17.04
MOL000398	isoflavanone	316.33	2.42	2	6	109.99	0.53	0.17	0.3	0	15.51
MOL000417	Calycosin	284.28	2.32	2	5	47.75	0.52	-0.43	0.24	0	17.1
MOL000422	kaempferol	286.25	1.77	4	6	41.88	0.26	-0.55	0.24	0	14.74
MOL000433	FA	441.45	0.01	7	13	68.96	-1.5	-2.59	0.71	0	24.81
MOL000438	(3R)-3-(2-hydroxy-3,4-dimethoxyphenyl)chroman-7-ol	302.35	3.13	2	5	67.67	0.96	0.34	0.26	0	2.9
MOL000439	isomucronulatol-7,2'-di-O-glucosiole	626.67	-0.68	8	15	49.28	-2.22	-3.36	0.62	0	0.93
MOL000442	1,7-Dihydroxy-3,9-dimethoxy pterocarpene	314.31	3.11	2	6	39.05	0.89	-0.04	0.48	0	7.95
MOL000098	quercetin	302.25	1.5	5	7	46.43	0.05	-0.77	0.28	0.38	14.4
MOL001323	Sitosterol alpha1	426.8	8.15	1	1	43.28	1.41	0.97	0.78	0.24	5.64
MOL003578	Cycloartenol	426.8	7.55	1	1	38.69	1.53	1.33	0.78	0	5
MOL001494	Mandenol	308.56	6.99	0	2	42	1.46	1.14	0.19	0.25	5.39
MOL001495	Ethyl linolenate	306.54	6.55	0	2	46.1	1.54	1.12	0.2	0.25	6.2
MOL001979	LAN	426.8	8.12	1	1	42.12	1.52	1.18	0.75	0.23	5.84
MOL000449	Stigmasterol	412.77	7.64	1	1	43.83	1.44	1	0.76	0.22	5.57
MOL000358	beta-sitosterol	414.79	8.08	1	1	36.91	1.32	0.99	0.75	0.23	5.36
MOL005406	atropine	289.41	1.72	1	4	45.97	0.43	0.01	0.19	0.28	2.75
MOL005438	campesterol	400.76	7.63	1	1	37.58	1.34	0.95	0.71	0.22	4.83
MOL006209	cyanin	411.66	7.08	0	1	47.42	1.78	0.99	0.76	0.28	2.72
MOL007449	24-methylidenelophenol	412.77	7.75	1	1	44.19	1.41	1	0.75	0.24	5.1
MOL008173	daucosterol_qt	414.79	8.08	1	1	36.91	1.33	0.85	0.75	0.23	5.6
MOL008400	glycitein	284.28	2.32	2	5	50.48	0.56	-0.29	0.24	0.3	16.32
MOL010234	delta-Carotene	536.96	12.19	0	0	31.8	2.33	1.42	0.55	0.35	2.62
MOL000953	CLR	386.73	7.38	1	1	37.87	1.43	1.13	0.68	0.2	4.52
MOL009604	14b-pregnane	288.57	6.54	0	0	34.78	1.8	1.95	0.34	0.2	4.57
MOL009612	(24R)-4alpha-Methyl-24-ethylcholesta-7,25-dien-3beta-ylacetate	482.87	8.79	0	2	46.36	1.39	1	0.84	0.26	8.25
MOL009615	24-Methylenecycloartan-3beta,21-diol	456.83	6.7	2	2	37.32	0.95	0.3	0.8	0.23	5.67
MOL009617	24-ethylcholest-22-enol	414.79	7.89	1	1	37.09	1.33	0.99	0.75	0.21	5.32
MOL009618	24-ethylcholesta-5,22-dienol	412.77	7.64	1	1	43.83	1.31	0.84	0.76	0.22	5.76
MOL009620	24-methyl-31-norlanost-9(11)-enol	428.82	8.15	1	1	38	1.33	0.93	0.75	0.23	5.49
MOL009621	24-methylenelanost-8-enol	440.83	8.43	1	1	42.37	1.44	1.18	0.77	0.25	5.43
MOL009622	Fucosterol	412.77	7.83	1	1	43.78	1.34	1.01	0.76	0.24	5.44
MOL009631	31-Norcyclolaudenol	440.83	8.04	1	1	38.68	1.35	0.94	0.81	0.25	4.88
MOL009633	31-norlanost-9(11)-enol	414.79	7.9	1	1	38.35	1.34	1.03	0.72	0.22	5.37
MOL009634	31-norlanosterol	412.77	7.85	1	1	42.2	1.4	1.03	0.73	0.24	5.27
MOL009635	4,24-methyllophenol	414.79	7.95	1	1	37.83	1.43	1.1	0.75	0.22	4.9
MOL009639	Lophenol	400.76	7.7	1	1	38.13	1.36	1.1	0.71	0.2	4.76
MOL009640	4alpha,14alpha,24-trimethylcholesta-8,24-dienol	426.8	8.29	1	1	38.91	1.4	1.06	0.76	0.24	6.67
MOL009641	4alpha,24-dimethylcholesta-7,24-dienol	412.77	7.89	1	1	42.65	1.43	0.98	0.75	0.23	5.44
MOL009642	4alpha-methyl-24-ethylcholesta-7,24-dienol	426.8	8.35	1	1	42.3	1.45	1.08	0.78	0.23	5.83
MOL009644	6-Fluoroindole-7-Dehydrocholesterol	402.7	7.04	1	2	43.73	1.03	0.54	0.72	0.24	5.1
MOL009646	7-O-Methylluteolin-6-C-beta-glucoside_qt	318.3	2.01	4	7	40.77	0.33	-0.47	0.3	0.29	14.1
MOL009650	Atropine	289.41	1.72	1	4	42.16	0.57	0.39	0.19	0.26	5.27
MOL009651	Cryptoxanthin monoepoxide	568.96	9.5	1	2	46.95	1.49	-0.03	0.56	0.33	4.4
MOL009653	Cycloeucalenol	426.8	7.59	1	1	39.73	1.42	1.04	0.79	0.23	5.01
MOL009656	(E,E)-1-ethyl octadeca-3,13-dienoate	308.56	6.99	0	2	42	1.46	1.11	0.19	0.21	5.47
MOL009660	methyl (1R,4aS,7R,7aS)-4a,7-dihydroxy-7-methyl-1-[(2S,3R,4S,5S,6R)-3,4,5-trihydroxy-6-(hydroxymethyl)oxan-2-yl]oxy-1,5,6,7a-tetrahydrocyclopenta[d]pyran-4-carboxylate	406.43	-3.18	6	11	39.43	-1.43	-2.06	0.47	0.23	7.64
MOL009662	Lantadene A	552.87	7.21	1	5	38.68	0.32	-0.3	0.57	0.3	5.44
MOL009664	Physalin A	526.58	0.5	3	10	91.71	-0.78	-1.11	0.27	0.39	13.21
MOL009665	Physcion-8-O-beta-D-gentiobioside	608.6	-0.91	8	15	43.9	-2.68	-3.52	0.62	0.29	28.46
MOL009677	lanost-8-en-3beta-ol	428.82	8.37	1	1	34.23	1.48	1.25	0.74	0.22	5.48
MOL009678	lanost-8-enol	428.82	8.37	1	1	34.23	1.37	1.12	0.74	0.22	6.41
MOL009681	Obtusifoliol	426.8	8.15	1	1	42.55	1.47	1.25	0.76	0.24	5.91
MOL000098	quercetin	302.25	1.5	5	7	46.43	0.05	-0.77	0.28	0.38	14.4
MOL001792	DFV	256.27	2.57	2	4	32.76	0.51	-0.29	0.18	0.42	17.89
MOL002714	baicalein	270.25	2.33	3	5	33.52	0.63	-0.05	0.21	0.36	16.25
MOL002959	3'-Methoxydaidzein	284.28	2.32	2	5	48.57	0.56	-0.32	0.24	0.34	17.04
MOL000358	beta-sitosterol	414.79	8.08	1	1	36.91	1.32	0.99	0.75	0.23	5.36
MOL000359	sitosterol	414.79	8.08	1	1	36.91	1.32	0.87	0.75	0.22	5.37
MOL003889	methylprotodioscin_qt	446.74	4.28	2	4	35.12	0.2	-0.45	0.86	0.19	5.48
MOL004941	(2R)-7-hydroxy-2-(4-hydroxyphenyl)chroman-4-one	256.27	2.57	2	4	71.12	0.41	-0.25	0.18	0	18.09
MOL000546	diosgenin	414.69	4.63	1	3	80.88	0.82	0.27	0.81	0.19	4.14
MOL006331	4',5-Dihydroxyflavone	254.25	2.6	2	4	48.55	0.76	-0.03	0.19	0	18.01
MOL009760	sibiricoside A_qt	432.71	3.88	2	4	35.26	0.16	-0.75	0.86	0.22	5.44
MOL009763	(+)-Syringaresinol-O-beta-D-glucoside	580.64	0.2	5	13	43.35	-0.97	-1.83	0.77	0.19	3.2
MOL009766	zhonghualiaoine 1	458.75	3.57	2	4	34.72	0.31	-0.38	0.78	0.21	5.25
MOL002879	Diop	390.62	7.44	0	4	43.59	0.79	0.26	0.39	0.28	3.6
MOL000449	Stigmasterol	412.77	7.64	1	1	43.83	1.44	1	0.76	0.22	5.57
MOL000358	beta-sitosterol	414.79	8.08	1	1	36.91	1.32	0.99	0.75	0.23	5.36
MOL003648	Inermin	284.28	2.44	1	5	65.83	0.91	0.36	0.54	0.3	11.73
MOL000422	kaempferol	286.25	1.77	4	6	41.88	0.26	-0.55	0.24	0	14.74
MOL004492	Chrysanthemaxanthin	584.96	8.24	2	3	38.72	0.51	-0.98	0.58	0.3	17.47
MOL005308	Aposiopolamine	271.34	1.39	1	4	66.65	0.66	0.4	0.22	0.35	3.54
MOL005314	Celabenzine	379.55	2.29	2	5	101.88	0.77	0.05	0.49	0.35	8.15
MOL005317	Deoxyharringtonine	515.66	3.13	1	9	39.27	0.19	-0.25	0.81	0.23	7.9
MOL005318	Dianthramine	289.26	2.05	5	7	40.45	-0.23	-0.97	0.2	0.42	5.14
MOL005320	arachidonate	304.52	6.41	1	2	45.57	1.27	0.58	0.2	0.26	7.56
MOL005321	Frutinone A	264.24	2.7	0	4	65.9	0.89	0.46	0.34	0.47	19.1
MOL005344	ginsenoside rh2	622.98	4.04	6	8	36.32	-0.51	-1.38	0.56	0.24	11.08
MOL005348	Ginsenoside-Rh4_qt	458.8	5.59	3	3	31.11	0.5	-0.18	0.78	0.25	6.97
MOL005356	Girinimbin	263.36	4.6	1	1	61.22	1.72	1.22	0.31	0.33	8.17
MOL005357	Gomisin B	514.62	2.73	1	9	31.99	0.6	0.18	0.83	0.19	7.81
MOL005360	malkangunin	432.56	1.84	2	7	57.71	0.22	-0.17	0.63	0.3	4.09
MOL005376	Panaxadiol	460.82	5.46	2	3	33.09	0.82	0.23	0.79	0.22	6.34
MOL005384	suchilactone	368.41	3.73	0	6	57.52	0.82	0.28	0.56	0.28	9.03
MOL005399	alexandrin_qt	414.79	8.08	1	1	36.91	1.3	0.88	0.75	0.23	5.53
MOL005401	ginsenoside Rg5_qt	442.8	6.8	2	2	39.56	0.88	0.21	0.79	0.24	5.65
MOL000787	Fumarine	353.4	2.95	0	6	59.26	0.56	-0.13	0.83	0.3	23.46
